# Supplementary material
Source: publisher site journal article supplement (https://oneecosystem.pensoft.net/article/download/suppl/3931339/)
Supplement: Supplementary file 1

Date.Time,SoilMoist70,SoilTemp70,RelHum70,AirTemp70,AirPress70,SolarRad70,WindAvg70,WindMax70,WindDir70,Prec70,Dist70,SoilMoist35,SoilTemp35,RelHum35,AirTemp35,AirPress35,SolarRad35,WindAvg35,WindMax35,WindDir35,Prec35,Dist35,SoilMoist0,SoilTemp0,RelHum0,AirTemp0,AirPress0,SolarRad0,WindAvg0,WindMax0,WindDir0,Prec0,Dist0,SoilMoist15,SoilTemp15,RelHum15,AirTemp15,AirPress15,SolarRad15,WindAvg15,WindMax15,WindDir15,Prec15,Dist15,SoilMoist30,SoilTemp30,RelHum30,AirTemp30,AirPress30,SolarRad30,WindAvg30,WindMax30,WindDir30,Prec30,Dist30
2016-06-15 07:00:00,0.073023044,14.5,1.022221327,12.80000019,99.07816315,21.97265625,0.379999995,0.699999988,252,,-70,0.049244896,14.80000019,1.002248526,13,99.13678741,40.28320313,0.219999999,0.400000006,181,,-35,0.058268797,15.60000038,0.921135366,14.39999962,99.10747528,146.484375,0.460000008,0.800000012,281,,0,0.179245099,16.60000038,0.903768539,15.30000019,99.12213135,217.8955078,0.340000004,0.899999976,262,,15,0.132085949,17.29999924,0.933228254,14.89999962,99.00488281,194.0917969,0.230000004,0.699999988,242,,30
2016-06-15 08:00:00,0.073023044,14.39999962,0.986819267,14.80000019,99.10747528,32.95898438,0.230000004,0.600000024,237,,-70,0.049244896,14.69999981,0.962760746,14.89999962,99.18075562,38.45214844,0.25999999,0.600000024,183,,-35,0.058268797,15.5,0.902922809,15.89999962,99.13678741,53.10058594,0.50999999,1.200000048,222,,0,0.179245099,16.60000038,0.890007377,16.60000038,99.15144348,164.7949219,0.519999981,1.100000024,203,,15,0.132085949,17.29999924,0.895305037,16.60000038,99.03419495,162.9638672,0.550000012,1.399999976,191,,30
2016-06-15 09:00:00,0.073023044,14.39999962,0.906348407,16.5,99.12213135,43.9453125,0.189999998,0.600000024,225,,-70,0.049244896,14.69999981,0.884709716,16.60000038,99.19541168,45.77636719,0.289999992,0.699999988,142,,-35,0.058268797,15.5,0.841871142,17,99.16609955,58.59375,0.519999981,1.299999952,161,,0,0.179245099,16.79999924,0.820261061,17.70000076,99.16609955,190.4296875,0.340000004,1,181,,15,0.132085949,17.39999962,0.825202405,17.70000076,99.06350708,192.2607422,0.330000013,1.200000048,170,,30
2016-06-15 10:00:00,0.073023044,14.39999962,0.886295438,17.39999962,99.12213135,29.296875,0.349999994,0.800000012,206,,-70,0.049244896,14.60000038,0.881779373,17.29999924,99.21006012,32.95898438,0.419999987,1,158,,-35,0.058268797,15.5,0.861116588,17.39999962,99.18075562,34.79003906,1.00999999,3,185,,0,0.179245099,17.10000038,0.849481165,17.79999924,99.18075562,130.0048828,1,4,193,,15,0.132085949,17.60000038,0.854850411,17.70000076,99.07816315,130.0048828,1.049999952,3.200000048,183,,30
2016-06-15 11:00:00,0.073023044,14.39999962,0.937686324,16.60000038,99.16609955,27.46582031,0.340000004,0.899999976,250,0.05,-70,0.048739769,14.60000038,0.93300575,16.5,99.23937225,27.46582031,0.289999992,1,210,,-35,0.058268797,15.60000038,0.922342777,16.5,99.21006012,23.80371094,0.720000029,2.599999905,222,,0,0.178847328,17.39999962,0.915387392,16.79999924,99.21006012,106.2011719,0.810000002,2.799999952,206,,15,0.132523268,17.79999924,0.916495681,16.60000038,99.07816315,115.3564453,1.070000052,2.900000095,197,,30
2016-06-15 12:00:00,0.074479006,14.39999962,0.98601383,15.89999962,99.19541168,23.80371094,0.439999998,1.200000048,249,0.45,-70,0.046715241,14.60000038,0.981189072,15.80000019,99.26868439,27.46582031,0.389999986,0.899999976,217,0.3,-35,0.058268797,15.60000038,0.97561413,15.80000019,99.22471619,27.46582031,0.629999995,2.599999905,240,0.05,0,0.175652832,17.5,0.968029857,16.10000038,99.22471619,113.5253906,0.709999979,2.299999952,222,1.8,15,0.131648242,17.89999962,0.96322161,16,99.13678741,113.5253906,0.910000026,2.799999952,213,1.6,30
2016-06-15 13:00:00,0.075447693,14.39999962,1.007254601,16,99.18075562,47.60742188,0.430000007,1.299999952,247,0.4,-70,0.046715241,14.69999981,0.997092664,15.89999962,99.25402832,49.43847656,0.379999995,1.100000024,200,0.3,-35,0.057770859,15.69999981,0.990742207,16,99.21006012,49.43847656,0.639999986,2.900000095,223,0.05,0,0.171628788,17.60000038,0.96499449,16.5,99.22471619,199.5849609,1.059999943,4.400000095,208,1.6,15,0.132523268,18,0.961161971,16.29999924,99.10747528,205.078125,1.370000005,4.5,205,1.8,30
2016-06-15 14:00:00,0.075931452,14.39999962,0.999914289,16.20000076,99.21006012,49.43847656,0.289999992,1,238,0.35,-70,0.047728308,14.69999981,0.995375335,16.10000038,99.28334045,51.26953125,0.270000011,0.800000012,209,0.25,-35,0.057770859,15.69999981,0.971961498,16.29999924,99.22471619,49.43847656,0.360000014,1.5,262,0.15,0,0.168791428,17.79999924,0.951179504,16.89999962,99.23937225,195.9228516,0.529999971,1.799999952,220,1.4,15,0.132960245,18.10000038,0.947538912,16.70000076,99.12213135,208.7402344,0.810000002,2.599999905,197,1.6,30
2016-06-15 15:00:00,0.076414824,14.5,0.991651773,16.5,99.21006012,40.28320313,0.239999995,0.800000012,235,0.2,-70,0.048234239,14.69999981,0.981886804,16.39999962,99.29799652,43.9453125,0.280000001,0.899999976,197,0.15,-35,0.057770859,15.69999981,0.964174688,16.60000038,99.23937225,47.60742188,0.340000004,1.600000024,245,,0,0.167977631,18,0.937524021,17.29999924,99.25402832,184.9365234,0.5,1.799999952,221,1,15,0.132960245,18.29999924,0.928935051,17.10000038,99.13678741,184.9365234,0.709999979,2.799999952,202,1,30
2016-06-15 16:00:00,0.076414824,14.5,1.000844359,16.10000038,99.21006012,29.296875,0.300000012,1.100000024,239,0.15,-70,0.048234239,14.80000019,0.989906192,16.10000038,99.28334045,31.12792969,0.319999993,0.800000012,194,0.1,-35,0.057770859,15.80000019,0.984437108,16.10000038,99.23937225,31.12792969,0.360000014,1.299999952,251,0.05,0,0.168384701,18.20000076,0.964174688,16.60000038,99.25402832,137.3291016,0.550000012,1.799999952,213,0.4,15,0.133396849,18.5,0.95505929,16.39999962,99.15144348,139.1601563,0.730000019,2.099999905,204,0.6,30
2016-06-15 17:00:00,0.076414824,14.5,0.981886804,16.39999962,99.19541168,62.25585938,0.25,0.800000012,201,,-70,0.048234239,14.80000019,0.977361321,16.29999924,99.26868439,64.08691406,0.319999993,1,174,,-35,0.057770859,15.80000019,0.943668664,16.5,99.22471619,58.59375,0.529999971,2.299999952,207,,0,0.173242539,18.29999924,0.907117844,17.29999924,99.22471619,232.5439453,0.629999995,2.400000095,205,,15,0.132960245,18.60000038,0.891331196,17.39999962,99.12213135,278.3203125,0.660000026,2.099999905,192,,30
2016-06-15 18:00:00,0.076414824,14.60000038,0.923802793,17.10000038,99.18075562,58.59375,0.25999999,0.600000024,191,,-70,0.048234239,14.89999962,0.92450881,17,99.25402832,67.74902344,0.330000013,0.800000012,167,,-35,0.058268797,15.89999962,0.87761265,17.10000038,99.22471619,54.93164063,1,2.5,186,,0,0.177651957,18.39999962,0.865230381,17.60000038,99.22471619,199.5849609,0.949999988,2.400000095,191,,15,0.132960245,18.70000076,0.848054707,18.10000038,99.12213135,285.6445313,0.930000007,2.700000048,176,,30
2016-06-15 19:00:00,0.076414824,14.60000038,0.928935051,17.10000038,99.18075562,29.296875,0.270000011,0.600000024,226,,-70,0.047728308,14.89999962,0.913538337,17.10000038,99.25402832,31.12792969,0.289999992,0.699999988,197,,-35,0.058268797,15.89999962,0.872074902,17.20000076,99.22471619,31.12792969,1.049999952,2.5,199,,0,0.178847328,18.5,0.870707631,17.5,99.23937225,120.8496094,1.080000043,2.400000095,206,,15,0.133833081,18.89999962,0.859791696,17.70000076,99.12213135,140.9912109,1.090000033,2.5,192,,30
2016-06-15 20:00:00,0.076414824,14.60000038,0.961574852,16.89999962,99.19541168,16.47949219,0.25,0.800000012,219,,-70,0.047728308,14.89999962,0.946772158,16.79999924,99.26868439,18.31054688,0.310000002,0.800000012,175,,-35,0.058766339,15.89999962,0.898141623,17.10000038,99.23937225,18.31054688,0.860000014,2.200000048,181,,0,0.180039614,18.5,0.891331196,17.39999962,99.23937225,69.58007813,0.709999979,1.399999976,194,,15,0.133833081,19,0.891331196,17.39999962,99.12213135,87.890625,0.75999999,1.600000024,169,,30
2016-06-15 21:00:00,0.076414824,14.69999981,0.988160849,16.29999924,99.25402832,1.831054688,0.379999995,1.200000048,236,,-70,0.047221974,15,0.983611345,16.20000076,99.32730865,3.662109375,0.370000005,1,208,,-35,0.058766339,16,0.967308342,16.20000076,99.28334045,1.831054688,0.519999981,3.5,250,,0,0.180039614,18.39999962,0.94900012,16.5,99.28334045,21.97265625,0.629999995,2.900000095,233,,15,0.133833081,18.89999962,0.938962817,16.39999962,99.18075562,20.14160156,0.839999974,3.299999952,219,,30
2016-06-15 22:00:00,0.076414824,14.69999981,0.939134717,14.89999962,99.23937225,0,0.360000014,1,236,0.05,-70,0.047221974,15,0.933317065,14.80000019,99.31265259,0,0.419999987,0.899999976,201,,-35,0.058766339,16,0.92141521,14.89999962,99.26868439,0,0.409999996,1.299999952,249,,0,0.180039614,18.29999924,0.915500939,15,99.28334045,0,0.689999998,2.5,218,,15,0.133833081,18.79999924,0.89778918,14.89999962,99.18075562,0,1,2.5,211,,30
2016-06-15 23:00:00,0.0768978,14.69999981,0.995904982,13.60000038,99.23937225,0,0.389999986,0.899999976,237,,-70,0.047221974,15,0.989475548,13.5,99.31265259,0,0.25,0.699999988,167,0.05,-35,0.058766339,16,0.983008385,13.5,99.26868439,0,0.349999994,1,274,,0,0.179642528,18,0.983054578,13.60000038,99.28334045,0,0.409999996,1.299999952,260,,15,0.133833081,18.5,0.976541221,13.5,99.18075562,0,0.469999999,1.899999976,247,,30
2016-06-16 00:00:00,0.0768978,14.69999981,1.015471816,13.39999962,99.31265259,0,0.479999989,1.200000048,244,,-70,0.046715241,15,1.009010911,13.30000019,99.40058899,0,0.330000013,0.800000012,192,,-35,0.058766339,16,1.00245893,13.30000019,99.35662079,0,0.529999971,1.799999952,252,,0,0.179245099,17.79999924,1.002409816,13.5,99.35662079,0,0.730000019,2.599999905,226,0.2,15,0.133396849,18.20000076,0.989434063,13.39999962,99.26868439,0,1.019999981,3.099999905,212,0.2,30
2016-06-16 01:00:00,0.0768978,14.69999981,1.022114992,13.30000019,99.35662079,0,0.439999998,1,235,0.05,-70,0.047221974,15,1.015617013,13.19999981,99.44454956,0,0.379999995,1.100000024,181,,-35,0.058766339,15.89999962,1.009010911,13.30000019,99.40058899,0,0.620000005,2.299999952,232,,0,0.178847328,17.5,1.008962393,13.39999962,99.38593292,0,1.110000014,3.099999905,215,,15,0.133396849,18,0.995906889,13.30000019,99.29799652,0,1.460000038,3.200000048,207,,30
2016-06-16 02:00:00,0.0768978,14.60000038,1.029002428,12.89999962,99.35662079,0,0.409999996,0.800000012,241,,-70,0.046715241,14.89999962,1.022221327,12.80000019,99.44454956,0,0.319999993,0.600000024,182,,-35,0.058766339,15.89999962,1.008825898,12.89999962,99.41524506,0,0.50999999,2.299999952,243,,0,0.178449214,17.29999924,1.008930087,13,99.38593292,0,0.860000014,2.599999905,220,,15,0.133396849,17.70000076,0.995374858,12.89999962,99.29799652,0,1.159999967,2.599999905,214,,30
2016-06-16 03:00:00,0.0768978,14.60000038,1.021597743,12.39999962,99.35662079,0,0.419999987,0.899999976,243,,-70,0.046715241,14.89999962,1.021036863,12.19999981,99.44454956,0,0.300000012,0.600000024,178,,-35,0.058268797,15.80000019,1.014343143,12.30000019,99.40058899,0,0.439999998,1.399999976,245,,0,0.177651957,17.10000038,1.01464808,12.39999962,99.41524506,0,0.800000012,2,213,,15,0.133396849,17.39999962,1.000352144,12.30000019,99.29799652,0,1.019999981,2.599999905,211,,30
2016-06-16 04:00:00,0.0768978,14.5,1.034234524,11.89999962,99.37127686,0,0.419999987,0.899999976,242,,-70,0.046715241,14.80000019,1.026621819,11.80000019,99.44454956,0,0.310000002,0.600000024,182,,-35,0.058268797,15.69999981,1.019392133,11.80000019,99.40058899,0,0.409999996,1.100000024,255,,0,0.177252814,16.79999924,1.019870162,11.89999962,99.40058899,0,0.569999993,1.799999952,218,,15,0.133396849,17.10000038,1.004932642,11.80000019,99.29799652,0,0.779999971,2.099999905,210,,30
2016-06-16 05:00:00,0.0768978,14.5,1.032429814,11.5,99.37127686,0,0.330000013,0.699999988,231,,-70,0.046715241,14.80000019,1.024439335,11.39999962,99.44454956,0,0.349999994,0.600000024,174,,-35,0.058268797,15.69999981,1.024439335,11.39999962,99.38593292,0,0.360000014,1.5,238,,0,0.177252814,16.5,1.025055289,11.5,99.41524506,1.831054688,0.649999976,1.399999976,214,,15,0.133396849,16.79999924,1.009592414,11.39999962,99.31265259,0,0.860000014,2.099999905,204,,30
2016-06-16 06:00:00,0.0768978,14.39999962,1.032429814,11.5,99.41524506,1.831054688,0.370000005,0.899999976,232,,-70,0.046715241,14.69999981,1.024439335,11.39999962,99.47386169,9.155273438,0.360000014,0.699999988,182,,-35,0.058268797,15.60000038,1.006515741,12.10000038,99.42990112,64.08691406,0.610000014,2.400000095,245,,0,0.177252814,16.29999924,1.020691991,12.10000038,99.42990112,100.7080078,0.790000021,2.400000095,216,,15,0.133396849,16.60000038,1.012162328,11.80000019,99.32730865,71.41113281,1.100000024,2.5,205,,30
2016-06-16 07:00:00,0.0768978,14.39999962,1.033851504,11.80000019,99.42990112,9.155273438,0.409999996,0.899999976,227,,-70,0.046715241,14.60000038,1.027438283,12,99.50317383,36.62109375,0.419999987,0.899999976,186,,-35,0.058268797,15.5,0.931995571,13.69999981,99.45920563,206.9091797,1.379999995,4,213,,0,0.178847328,16.10000038,0.963606894,13.5,99.44454956,260.0097656,1.860000014,4.199999809,210,,15,0.133396849,16.39999962,0.962857723,13.19999981,99.35662079,194.0917969,2.079999924,4.099999905,202,,30
2016-06-16 08:00:00,0.0768978,14.30000019,1.035727859,12.89999962,99.44454956,21.97265625,0.419999987,1.299999952,223,,-70,0.046715241,14.5,1.00245893,13.30000019,99.53248596,43.9453125,0.370000005,1,188,,-35,0.058268797,15.39999962,0.874986112,15.30000019,99.47386169,184.9365234,1.049999952,4.099999905,230,,0,0.180436358,16.10000038,0.87525022,15.60000038,99.48851776,399.1699219,1.460000038,4.900000095,206,,15,0.133396849,16.20000076,0.892136395,15.10000038,99.40058899,318.6035156,1.870000005,4.900000095,201,,30
2016-06-16 09:00:00,0.0768978,14.19999981,0.945041239,14.89999962,99.47386169,84.22851563,0.449999988,1.5,244,,-70,0.045700561,14.5,0.909593284,15.19999981,99.54714203,106.2011719,0.370000005,1.200000048,213,,-35,0.058268797,15.39999962,0.816039205,16.89999962,99.50317383,205.078125,0.899999976,4.300000191,237,,0,0.180436358,16.5,0.800650716,17.5,99.50317383,538.3300781,1.230000019,4.800000191,202,,15,0.133396849,16.20000076,0.821233273,16.79999924,99.41524506,477.9052734,1.639999986,5.400000095,199,,30
2016-06-16 10:00:00,0.076414824,14.19999981,0.81566292,17.5,99.5178299,199.5849609,0.5,1.5,231,,-70,0.045700561,14.39999962,0.800687313,17.39999962,99.59111023,133.6669922,0.5,1.5,211,,-35,0.058268797,15.5,0.737401485,18.20000076,99.54714203,265.5029297,1.649999976,4.400000095,206,,0,0.180436358,17.10000038,0.724034846,18.79999924,99.54714203,664.6728516,1.850000024,4.400000095,198,,15,0.133396849,16.39999962,0.737663567,18.39999962,99.42990112,617.0654297,1.889999986,4.900000095,198,,30
2016-06-16 11:00:00,0.076414824,14.19999981,0.714942575,18.89999962,99.5178299,170.2880859,0.50999999,1.799999952,254,,-70,0.046208102,14.39999962,0.693004668,19.39999962,99.59111023,479.7363281,0.419999987,1.399999976,194,,-35,0.058766339,15.80000019,0.674699783,19.20000076,99.5617981,487.0605469,1.649999976,6.099999905,208,,0,0.180832773,17.89999962,0.663207114,19.89999962,99.54714203,791.015625,1.879999995,6,200,,15,0.133396849,17.20000076,0.671279728,19.60000038,99.45920563,767.2119141,2,5.5,194,,30
2016-06-16 12:00:00,0.075931452,14.19999981,0.63075453,20.5,99.5178299,318.6035156,0.529999971,1.899999976,254,,-70,0.047221974,14.39999962,0.631001115,20.60000038,99.59111023,285.6445313,0.430000007,1.399999976,197,,-35,0.058766339,16,0.622132957,20.39999962,99.5617981,556.640625,1.419999957,4.699999809,211,,0,0.181624562,18.89999962,0.612116098,21.20000076,99.5617981,849.609375,1.700000048,5.599999905,200,,15,0.133833081,18.10000038,0.61540401,20.89999962,99.45920563,847.7783203,1.769999981,5.099999905,194,,30
2016-06-16 13:00:00,0.075931452,14.39999962,0.58429265,21.20000076,99.53248596,205.078125,0.540000021,1.600000024,229,,-70,0.047728308,14.5,0.57634306,21.20000076,99.6057663,199.5849609,0.469999999,1.399999976,170,,-35,0.059263483,16.39999962,0.570317507,20.79999924,99.57645416,82.39746094,1.529999971,5,203,,0,0.182019949,20,0.558511972,21.60000038,99.5617981,778.1982422,1.75999999,4.699999809,196,,15,0.134704471,18.89999962,0.564917862,21.29999924,99.47386169,787.3535156,1.75999999,5.099999905,194,,30
2016-06-16 14:00:00,0.075931452,14.5,0.544062734,21.79999924,99.53248596,135.4980469,0.49000001,1.700000048,207,,-70,0.048234239,14.69999981,0.543542385,21.70000076,99.6057663,166.6259766,0.50999999,1.600000024,155,,-35,0.059263483,16.60000038,0.525413096,21.29999924,99.59111023,84.22851563,2.24000001,6,195,,0,0.182019949,20.70000076,0.522909462,22.10000038,99.57645416,642.7001953,2.230000019,5.5,202,,15,0.134704471,19.5,0.519147515,22.10000038,99.47386169,677.4902344,2.309999943,5.400000095,191,,30
2016-06-16 15:00:00,0.075931452,14.69999981,0.551725566,21.79999924,99.54714203,142.8222656,0.430000007,1.299999952,202,,-70,0.048234239,14.89999962,0.546876311,21.60000038,99.6057663,128.1738281,0.479999989,1.299999952,163,,-35,0.059263483,16.79999924,0.519014359,21.5,99.59111023,106.2011719,2.170000076,5.400000095,198,,0,0.182414994,21,0.518537164,22,99.57645416,468.75,2.349999905,5.900000095,203,,15,0.134704471,20,0.519147515,22.10000038,99.47386169,516.3574219,2.359999895,5.599999905,192,,30
2016-06-16 16:00:00,0.075931452,14.80000019,0.537957191,22.10000038,99.53248596,104.3701172,0.400000006,1.600000024,192,,-70,0.048234239,15.10000038,0.54075098,21.89999962,99.59111023,91.55273438,0.460000008,1.399999976,154,,-35,0.059263483,16.89999962,0.50499326,21.70000076,99.57645416,80.56640625,2.099999905,5.099999905,196,,0,0.182019949,21.10000038,0.5054304,22.29999924,99.5617981,391.8457031,2.339999914,5.300000191,203,,15,0.134704471,20.20000076,0.506059289,22.39999962,99.47386169,450.4394531,2.299999952,5.099999905,194,,30
2016-06-16 17:00:00,0.076414824,14.89999962,0.558511972,21.60000038,99.53248596,73.2421875,0.460000008,1.299999952,264,,-70,0.048234239,15.19999981,0.565842748,21.5,99.59111023,76.90429688,0.330000013,1.100000024,192,,-35,0.059263483,17,0.528122723,21.70000076,99.57645416,65.91796875,0.920000017,3.400000095,213,,0,0.182019949,21,0.51225549,22.20000076,99.5617981,247.1923828,1.200000048,3.5,210,,15,0.134704471,20.39999962,0.5054304,22.29999924,99.47386169,322.265625,1.299999952,4.300000191,198,,30
2016-06-16 18:00:00,0.076414824,15,0.624287486,21.39999962,99.54714203,42.11425781,0.280000001,0.800000012,214,,-70,0.048739769,15.39999962,0.616090894,21.20000076,99.62042236,42.11425781,0.310000002,0.800000012,156,,-35,0.059263483,17.10000038,0.539119184,21.60000038,99.59111023,40.28320313,1.25,3.900000095,198,,0,0.182019949,20.89999962,0.551725566,21.79999924,99.57645416,162.9638672,1.360000014,3.099999905,204,,15,0.134704471,20.39999962,0.552175283,21.89999962,99.48851776,186.7675781,1.309999943,3.200000048,193,,30
2016-06-16 19:00:00,0.076414824,15.10000038,0.725117981,20.79999924,99.50317383,27.46582031,0.129999995,0.300000012,204,,-70,0.049244896,15.5,0.676233649,20.79999924,99.57645416,27.46582031,0.330000013,0.600000024,131,,-35,0.059263483,17.10000038,0.616090894,21.20000076,99.5617981,25.63476563,0.939999998,2.200000048,187,,0,0.182019949,20.79999924,0.636066437,21.39999962,99.54714203,113.5253906,0.75999999,1.799999952,190,,15,0.134268954,20.39999962,0.639987648,21.5,99.45920563,124.5117188,0.430000007,1.299999952,164,,30
2016-06-16 20:00:00,0.076414824,15.10000038,0.795410454,20.10000038,99.45920563,14.6484375,0.280000001,0.600000024,252,,-70,0.049244896,15.60000038,0.752459943,20.20000076,99.53248596,16.47949219,0.209999993,0.400000006,164,,-35,0.059263483,17.10000038,0.684615612,20.60000038,99.5178299,14.6484375,0.560000002,1.399999976,220,,0,0.182019949,20.60000038,0.680307329,20.79999924,99.50317383,64.08691406,0.589999974,1.5,224,,15,0.134268954,20.29999924,0.688454688,20.79999924,99.41524506,75.07324219,0.400000006,1.299999952,219,,30
2016-06-16 21:00:00,0.076414824,15.19999981,0.818635762,19.20000076,99.45920563,3.662109375,0.340000004,0.699999988,265,,-70,0.049244896,15.60000038,0.814702094,19.10000038,99.54714203,5.493164063,0.129999995,0.400000006,197,,-35,0.059760228,17.10000038,0.782651782,19.20000076,99.5178299,5.493164063,0.319999993,0.800000012,284,,0,0.182019949,20.29999924,0.790736079,19.39999962,99.5178299,32.95898438,0.230000004,0.600000024,288,,15,0.133833081,20.20000076,0.800142646,19.29999924,99.41524506,32.95898438,0.209999993,1,33,,30
2016-06-16 22:00:00,0.076414824,15.19999981,0.795051277,18.10000038,99.45920563,0,0.300000012,0.699999988,243,,-70,0.049244896,15.69999981,0.790367067,18,99.53248596,0,0.219999999,0.5,164,,-35,0.059760228,17.10000038,0.780595839,18.10000038,99.50317383,0,0.389999986,0.899999976,252,,0,0.182019949,20,0.814611495,18,99.5178299,0,0.379999995,0.800000012,232,,15,0.133396849,20,0.835085034,17.70000076,99.40058899,0,0.379999995,0.800000012,210,,30
2016-06-16 23:00:00,0.076414824,15.19999981,0.867695391,17,99.45920563,0,0.419999987,1,264,,-70,0.049244896,15.69999981,0.868016243,16.89999962,99.5178299,0,0.200000003,0.699999988,221,,-35,0.059760228,17,0.862818539,16.89999962,99.50317383,0,0.479999989,1,279,,0,0.181624562,19.70000076,0.872860253,17,99.48851776,0,0.479999989,1,277,,15,0.133396849,19.79999924,0.884002686,16.79999924,99.40058899,0,0.430000007,1,278,,30
2016-06-17 00:00:00,0.076414824,15.19999981,0.88923347,16.79999924,99.44454956,0,0.400000006,0.899999976,263,,-70,0.049244896,15.69999981,0.879105508,16.70000076,99.50317383,0,0.25,0.699999988,195,,-35,0.059263483,17,0.852423131,16.89999962,99.47386169,0,0.479999989,1.100000024,290,,0,0.181624562,19.29999924,0.857365668,17,99.48851776,0,0.5,1.700000048,303,,15,0.133396849,19.5,0.857620835,16.89999962,99.38593292,0,0.50999999,1.799999952,320,,30
2016-06-17 01:00:00,0.076414824,15.19999981,0.911679864,16.5,99.37127686,0,0.25,0.699999988,267,,-70,0.049244896,15.60000038,0.906769812,16.39999962,99.44454956,0,0.150000006,0.699999988,170,,-35,0.059263483,16.89999962,0.874359667,16.5,99.40058899,0,0.319999993,0.899999976,290,,0,0.181228831,19.10000038,0.879412055,16.60000038,99.41524506,0,0.379999995,0.899999976,305,,15,0.132960245,19.29999924,0.885022581,16.5,99.31265259,0,0.430000007,1.5,320,,30
2016-06-17 02:00:00,0.076414824,15.19999981,0.941698611,15.89999962,99.26868439,0,0.270000011,0.899999976,286,,-70,0.049244896,15.60000038,0.936589539,15.80000019,99.34196472,0,0.159999996,0.899999976,244,,-35,0.059263483,16.79999924,0.874924958,16.20000076,99.31265259,0,0.400000006,1.600000024,326,,0,0.180832773,18.79999924,0.863845766,16.39999962,99.31265259,0,0.600000024,1.799999952,347,,15,0.132960245,19.10000038,0.874924958,16.20000076,99.21006012,0,0.779999971,2.200000048,355,,30
2016-06-17 03:00:00,0.076414824,15.10000038,0.936589539,15.80000019,99.21006012,0,0.340000004,1,272,,-70,0.049244896,15.60000038,0.931717992,15.60000038,99.28334045,0,0.189999998,0.899999976,250,,-35,0.059263483,16.79999924,0.891990066,15.80000019,99.23937225,0,0.340000004,1.600000024,291,,0,0.180436358,18.60000038,0.897172093,16,99.23937225,0,0.379999995,1.5,329,,15,0.132960245,18.89999962,0.875155628,16,99.15144348,0,0.589999974,2.400000095,355,,30
2016-06-17 04:00:00,0.076414824,15.10000038,0.943011522,15.60000038,99.13678741,0,0.419999987,0.800000012,261,0.05,-70,0.049244896,15.5,0.937708795,15.5,99.19541168,0,0.289999992,0.699999988,243,0.05,-35,0.059263483,16.70000076,0.897716463,15.69999981,99.16609955,0,0.360000014,1,281,,0,0.180436358,18.39999962,0.897383392,15.89999962,99.16609955,0,0.400000006,1.299999952,291,0.2,15,0.132960245,18.70000076,0.8807652,15.89999962,99.07816315,0,0.430000007,1.399999976,316,,30
2016-06-17 05:00:00,0.078344405,15.10000038,0.993204296,14.69999981,99.09281921,0,0.680000007,1.299999952,260,1.25,-70,0.048739769,15.5,0.981569946,14.60000038,99.15144348,0,0.469999999,1,244,1.2,-35,0.060256578,16.70000076,0.981569946,14.60000038,99.12213135,0,0.610000014,1.299999952,276,0.75,0,0.17122449,18.20000076,0.974929929,14.80000019,99.13678741,0,0.550000012,1.200000048,272,5,15,0.133833081,18.5,0.957095802,14.80000019,99.03419495,0,0.400000006,1.200000048,263,6,30
2016-06-17 06:00:00,0.078825824,15,1.012638927,14.39999962,99.01953888,0,0.75999999,1.299999952,268,0.4,-70,0.050757874,15.39999962,1.006931901,14.30000019,99.07816315,0,0.379999995,0.899999976,250,0.4,-35,0.06075253,16.60000038,1.006931901,14.30000019,99.04885101,0,0.600000024,1.200000048,281,0.35,0,0.165937051,18.10000038,1.00005281,14.5,99.04885101,0,0.589999974,1.299999952,278,1.6,15,0.135139614,18.29999924,0.988237977,14.39999962,98.96091461,0,0.319999993,1.299999952,294,1.8,30
2016-06-17 07:00:00,0.0768978,15,1.018739104,14.39999962,99.00488281,0,0.589999974,1.299999952,266,2.25,-70,0.049244896,15.39999962,1.013071775,14.30000019,99.07816315,0,0.379999995,0.899999976,247,2.3,-35,0.067163914,16.5,1.013071775,14.30000019,99.03419495,0,0.629999995,1.399999976,277,2.05,0,0.16224207,17.89999962,1.006113648,14.5,99.04885101,0,0.439999998,2.099999905,273,9.4,15,0.13644287,18.10000038,0.994338155,14.39999962,98.96091461,0,0.370000005,2.200000048,320,11.8,30
2016-06-17 08:00:00,0.061248086,14.89999962,1.025351405,14.30000019,98.97557068,0,0.419999987,1,272,2.55,-70,0.047221974,15.30000019,1.020061016,14.10000038,99.03419495,1.831054688,0.280000001,1,240,3.05,-35,0.095432103,16.29999924,1.013472676,14.19999981,98.99022675,0,0.469999999,1.200000048,283,1.95,0,0.168384701,17.70000076,1.012638927,14.39999962,99.00488281,16.47949219,0.409999996,2.299999952,324,11.6,15,0.139471114,17.89999962,0.994652212,14.30000019,98.91695404,10.98632813,0.610000014,3.299999952,20,12.2,30
2016-06-17 09:00:00,0.071076281,14.89999962,1.025351405,14.30000019,98.93161011,1.831054688,0.5,1.100000024,273,1.5,-70,0.05025395,15.19999981,1.019652367,14.19999981,99.00488281,1.831054688,0.270000011,0.800000012,251,1.7,-35,0.099626377,16.10000038,1.019652367,14.19999981,98.96091461,1.831054688,0.569999993,1.399999976,286,0.75,0,0.211089194,17.5,1.018739104,14.39999962,98.97557068,23.80371094,0.400000006,2,300,7.8,15,0.166345865,17.70000076,1.000792027,14.30000019,98.88764191,18.31054688,0.589999974,3.400000095,18,8,30
2016-06-17 10:00:00,0.101480618,14.89999962,1.024839401,14.39999962,98.93161011,3.662109375,0.479999989,1.5,263,2.4,-70,0.103328802,15.19999981,1.019211531,14.30000019,99.00488281,5.493164063,0.25999999,1.100000024,227,2.25,-35,0.106089734,16,1.019211531,14.30000019,98.94626617,3.662109375,0.469999999,1.5,277,1.55,0,0.231304511,17.29999924,1.018235564,14.5,98.96091461,36.62109375,0.439999998,2.5,321,12,15,0.224199265,17.5,1.000438452,14.39999962,98.87298584,32.95898438,0.670000017,3,38,11.8,30
2016-06-17 11:00:00,0.136876568,14.89999962,1.030939579,14.39999962,98.93161011,5.493164063,0.560000002,1.5,262,0.7,-70,0.124151386,15.10000038,1.025832057,14.19999981,99.00488281,7.32421875,0.310000002,1.100000024,238,0.15,-35,0.11111623,16,1.019211531,14.30000019,98.94626617,5.493164063,0.579999983,1.899999976,277,,0,0.239665747,17.20000076,1.011679411,14.60000038,98.96091461,40.28320313,0.370000005,1.600000024,253,3,15,0.260125607,17.39999962,0.987930954,14.5,98.87298584,40.28320313,0.49000001,3.200000048,101,3.4,30
2016-06-17 12:00:00,0.151828885,14.80000019,1.025832057,14.19999981,98.99022675,3.662109375,0.589999974,1.600000024,268,1.75,-70,0.129454285,15.10000038,1.026280999,14.10000038,99.04885101,5.493164063,0.310000002,1.200000048,247,1.45,-35,0.114743389,15.89999962,1.020061016,14.10000038,99.00488281,3.662109375,0.620000005,1.899999976,281,0.4,0,0.240010276,17.20000076,1.012638927,14.39999962,99.00488281,34.79003906,0.449999988,4,255,9,15,0.270733058,17.29999924,0.988512397,14.30000019,98.93161011,29.296875,0.649999976,4.599999905,134,9.2,30
2016-06-17 13:00:00,0.165937051,14.80000019,1.032957911,14,99.12213135,3.662109375,0.600000024,1.5,268,1.9,-70,0.134704471,15.10000038,1.02708137,13.89999962,99.18075562,5.493164063,0.340000004,1.200000048,235,1.65,-35,0.119691774,15.89999962,1.020780206,13.89999962,99.13678741,3.662109375,0.600000024,2.200000048,282,0.2,0,0.24683626,17.10000038,1.013472676,14.19999981,99.15144348,36.62109375,0.370000005,5.099999905,247,9,15,0.281333387,17.29999924,0.988961637,14.10000038,99.06350708,31.12792969,0.680000007,4.099999905,143,9.2,30
2016-06-17 14:00:00,0.176053345,14.80000019,1.026697516,14,99.22471619,3.662109375,0.49000001,1.700000048,260,1.7,-70,0.138607711,15,1.02708137,13.89999962,99.28334045,5.493164063,0.270000011,1.200000048,222,1.45,-35,0.128574133,15.69999981,1.020780206,13.89999962,99.22471619,3.662109375,0.430000007,2,277,,0,0.274512023,16.89999962,1.013472676,14.19999981,99.23937225,32.95898438,0.449999988,4.099999905,198,7.2,15,0.2883192,17.10000038,0.988961637,14.10000038,99.15144348,32.95898438,0.800000012,5.900000095,181,7.8,30
2016-06-17 15:00:00,0.178449214,14.69999981,1.027431846,13.80000019,99.31265259,18.31054688,0.430000007,1.399999976,258,0.7,-70,0.139902279,15,1.021365047,13.69999981,99.37127686,20.14160156,0.25999999,1.299999952,215,0.25,-35,0.127692536,15.69999981,1.021365047,13.69999981,99.34196472,16.47949219,0.389999986,2.400000095,265,,0,0.277629673,16.79999924,1.007621288,14.10000038,99.34196472,87.890625,0.629999995,3.099999905,194,3.2,15,0.289219558,17,0.989274681,13.89999962,99.25402832,87.890625,1.070000052,5.800000191,188,3.2,30
2016-06-17 16:00:00,0.175652832,14.69999981,1.029745102,14.60000038,99.42990112,27.46582031,0.310000002,1.200000048,252,0.2,-70,0.139902279,15,1.030357361,14.5,99.48851776,31.12792969,0.25,0.899999976,182,,-35,0.129014403,15.69999981,1.023723245,14.60000038,99.42990112,27.46582031,0.310000002,2.099999905,246,,0,0.277939886,16.70000076,1.00939846,15,99.45920563,131.8359375,0.720000029,3.400000095,192,0.8,15,0.287717611,17,0.986386776,14.89999962,99.37127686,131.8359375,1.080000043,5.5,191,1,30
2016-06-17 17:00:00,0.172032744,14.69999981,1.029537678,15.39999962,99.53248596,34.79003906,0.280000001,0.899999976,215,0.05,-70,0.138607711,14.89999962,1.031258702,15.19999981,99.59111023,38.45214844,0.319999993,1,162,,-35,0.128574133,15.69999981,1.012378693,15.39999962,99.54714203,32.95898438,0.360000014,2.200000048,230,,0,0.276697367,16.79999924,0.991553247,15.89999962,99.5617981,148.3154297,0.870000005,2.700000048,197,,15,0.285603195,17,0.970039189,15.80000019,99.47386169,157.4707031,1.059999943,3.200000048,195,,30
2016-06-17 18:00:00,0.168384701,14.69999981,0.988160849,16.29999924,99.59111023,62.25585938,0.25,1.100000024,221,,-70,0.139039591,14.89999962,0.98904562,16.20000076,99.66439056,78.73535156,0.270000011,0.899999976,160,,-35,0.127251178,15.69999981,0.961161971,16.29999924,99.62042236,49.43847656,0.479999989,3.599999905,213,,0,0.279177845,17.10000038,0.925848961,16.79999924,99.63507843,203.2470703,1.190000057,3.700000048,201,,15,0.284084558,17.20000076,0.898684502,17,99.54714203,311.2792969,1.429999948,5.400000095,198,,30
2016-06-17 19:00:00,0.165527895,14.69999981,0.96499449,16.5,99.6497345,20.14160156,0.319999993,1.100000024,211,0.8,-70,0.140333071,14.89999962,0.95505929,16.39999962,99.7230072,21.97265625,0.349999994,0.800000012,158,0.55,-35,0.127251178,15.69999981,0.905900359,16.60000038,99.69369507,18.31054688,0.610000014,2.700000048,226,0.45,0,0.280718923,17.29999924,0.883609354,16.89999962,99.69369507,64.08691406,1.149999976,3.799999952,218,4.8,15,0.281946748,17.39999962,0.856775343,17.20000076,99.6057663,113.5253906,1.330000043,4.699999809,202,5,30
2016-06-17 20:00:00,0.166754335,14.69999981,0.994338155,14.39999962,99.7230072,16.47949219,0.25,0.800000012,208,0.4,-70,0.139902279,14.89999962,0.988512397,14.30000019,99.8109436,18.31054688,0.280000001,0.699999988,161,0.35,-35,0.131210178,15.80000019,0.976037502,14.39999962,99.7669754,16.47949219,0.419999987,1.799999952,225,,0,0.277319193,17.5,0.957305312,14.69999981,99.75231934,65.91796875,0.800000012,2.5,207,1.4,15,0.283475161,17.5,0.933372676,14.69999981,99.679039,75.07324219,0.810000002,2.799999952,192,1.6,30
2016-06-17 21:00:00,0.166345865,14.69999981,1.019652367,14.19999981,99.78163147,1.831054688,0.330000013,0.800000012,191,,-70,0.141193599,15,1.020061016,14.10000038,99.88422394,1.831054688,0.400000006,0.899999976,166,,-35,0.132085949,15.80000019,1.007292986,14.19999981,99.82559967,1.831054688,0.540000021,2.400000095,217,,0,0.2782498,17.39999962,0.994338155,14.39999962,99.8109436,20.14160156,1.149999976,2.5,213,0.2,15,0.28286463,17.5,0.969937265,14.39999962,99.73766327,18.31054688,1.360000014,3,201,,30
2016-06-17 22:00:00,0.165118396,14.69999981,1.032500863,14.10000038,99.84025574,0,0.360000014,0.699999988,186,,-70,0.140763521,15,1.026280999,14.10000038,99.94284058,0,0.419999987,0.800000012,170,,-35,0.132085949,15.89999962,1.019211531,14.30000019,99.88422394,0,0.709999979,2.299999952,208,,0,0.281026304,17.20000076,1.006113648,14.5,99.88422394,0,1.330000043,2.700000048,210,,15,0.281026304,17.29999924,0.981869996,14.5,99.79628754,0,1.409999967,3.099999905,203,,30
2016-06-17 23:00:00,0.163065612,14.69999981,1.032957911,14,99.92818451,0,0.370000005,0.899999976,189,,-70,0.139902279,15,1.02708137,13.89999962,99.98680878,0,0.449999988,1,168,,-35,0.131210178,15.89999962,1.013472676,14.19999981,99.95749664,0,1,2.900000095,203,,0,0.282252967,17.10000038,1.00653863,14.39999962,99.95749664,0,1.639999986,3.400000095,207,,15,0.279177845,17.20000076,0.988512397,14.30000019,99.8549118,0,1.710000038,3.700000048,198,,30
2016-06-18 00:00:00,0.161417112,14.69999981,1.03968358,13.89999962,99.97215271,0,0.300000012,0.699999988,197,,-70,0.138607711,15,1.033774018,13.80000019,100.030777,0,0.349999994,0.800000012,167,,-35,0.130771756,15.80000019,1.013841152,14.10000038,99.98680878,0,0.600000024,2,212,,0,0.28286463,16.89999962,1.013071775,14.30000019,100.0014648,0,1.159999967,3,206,,15,0.277319193,17,0.994933486,14.19999981,99.89888,0,1.379999995,3.599999905,195,,30
2016-06-18 01:00:00,0.159762979,14.69999981,1.034456134,13.60000038,100.045433,0,0.340000004,0.800000012,191,,-70,0.138175473,14.89999962,1.02827847,13.5,100.0894012,0,0.430000007,0.899999976,163,,-35,0.130771756,15.80000019,1.021365047,13.69999981,100.0600891,0,0.709999979,2.400000095,205,,0,0.280411273,16.70000076,1.008177996,13.89999962,100.0747452,0,1.159999967,2.900000095,202,,15,0.275450319,16.79999924,0.98937881,13.80000019,99.97215271,0,1.350000024,3.200000048,193,0.2,30
2016-06-18 02:00:00,0.157687426,14.60000038,1.042186022,13.10000038,100.1040573,0,0.270000011,0.600000024,194,,-70,0.136876568,14.89999962,1.03565681,13,100.162674,0,0.360000014,0.699999988,157,,-35,0.130771756,15.69999981,1.022114992,13.30000019,100.1333694,0,0.540000021,1.799999952,209,,0,0.254536152,16.5,1.021981239,13.39999962,100.1333694,0,1.019999981,2.900000095,201,,15,0.273885071,16.70000076,0.995943487,13.39999962,100.045433,0,1.190000057,3.200000048,190,,30
2016-06-18 03:00:00,0.156020626,14.60000038,1.042530417,12.80000019,100.162674,0,0.310000002,0.600000024,193,,-70,0.13644287,14.89999962,1.035754561,12.69999981,100.2212982,0,0.400000006,0.800000012,163,,-35,0.130771756,15.69999981,1.029002428,12.89999962,100.17733,0,0.649999976,2.299999952,207,,0,0.250203609,16.29999924,1.015633464,13.10000038,100.17733,0,1.100000024,3.099999905,202,,15,0.272312641,16.5,1.002248526,13,100.0894012,0,1.320000052,3.5,192,,30
2016-06-18 04:00:00,0.15434818,14.5,1.042530417,12.80000019,100.2212982,0,0.289999992,0.800000012,208,,-70,0.135574386,14.80000019,1.035754561,12.69999981,100.2799225,0,0.389999986,0.899999976,168,,-35,0.130771756,15.69999981,1.029002428,12.89999962,100.2359543,0,0.629999995,2.200000048,214,,0,0.248186842,16.20000076,1.022271633,13.10000038,100.2506104,0,1.129999995,3.099999905,202,,15,0.271049559,16.29999924,1.002248526,13,100.162674,0,1.350000024,3.5,195,,30
2016-06-18 05:00:00,0.152670071,14.5,1.042338371,13,100.2799225,0,0.280000001,0.699999988,205,,-70,0.135139614,14.69999981,1.035727859,12.89999962,100.3532028,0,0.360000014,0.699999988,164,,-35,0.130332962,15.60000038,1.028975129,13,100.2945786,0,0.730000019,3.099999905,206,,0,0.24582015,16,1.022211909,13.19999981,100.3238907,0,1.049999952,2.400000095,198,,15,0.269464195,16.20000076,0.995719135,13.10000038,100.2212982,0,1.220000029,2.799999952,193,,30
2016-06-18 06:00:00,0.151407763,14.5,1.042567968,12.60000038,100.3238907,1.831054688,0.289999992,0.600000024,191,,-70,0.134268954,14.69999981,1.035623312,12.5,100.3825073,5.493164063,0.400000006,0.699999988,154,,-35,0.130332962,15.5,1.022221327,12.80000019,100.3385468,18.31054688,0.74000001,2.200000048,204,,0,0.244120523,16,1.015551329,12.89999962,100.3532028,42.11425781,1.120000005,2.900000095,203,,15,0.268190682,16.10000038,1.001683712,12.69999981,100.2506104,36.62109375,1.179999948,2.400000095,196,,30
2016-06-18 07:00:00,0.150142252,14.39999962,1.042530417,12.80000019,100.3825073,12.81738281,0.200000003,0.5,198,,-70,0.133833081,14.60000038,1.035760641,12.80000019,100.4411316,23.80371094,0.300000012,0.699999988,156,,-35,0.130332962,15.5,0.989447355,13.69999981,100.3971634,89.72167969,0.680000007,2.599999905,216,,0,0.242070913,15.89999962,0.989447355,13.69999981,100.3971634,148.3154297,1.019999981,2.900000095,204,,15,0.267232507,16,0.976541221,13.5,100.3092346,130.0048828,1.190000057,3.599999905,198,,30
2016-06-18 08:00:00,0.148873523,14.39999962,1.040881276,13.60000038,100.4118195,29.296875,0.25999999,0.800000012,209,,-70,0.133396849,14.60000038,1.040515661,13.69999981,100.4850998,49.43847656,0.310000002,1,166,,-35,0.129454285,15.5,0.932551026,15.30000019,100.4411316,126.3427734,0.709999979,2.5,230,,0,0.238284603,15.89999962,0.926071227,15.60000038,100.4557877,287.4755859,1.200000048,3.299999952,203,,15,0.26627174,15.89999962,0.927122116,15.10000038,100.3532028,250.8544922,1.460000038,3.799999952,201,,30
2016-06-18 09:00:00,0.147601604,14.39999962,0.991792738,15,100.4557877,69.58007813,0.319999993,1.399999976,208,,-70,0.133396849,14.5,0.961735606,15.19999981,100.5144119,91.55273438,0.340000004,1,175,,-35,0.129014403,15.5,0.885564923,16.29999924,100.4850998,184.9365234,1.110000014,4.300000191,214,,0,0.234810099,16.29999924,0.868577302,16.70000076,100.4704437,435.7910156,1.669999957,5.699999809,203,0.2,15,0.264986604,16,0.869211257,16.39999962,100.3825073,399.1699219,2,5.400000095,201,,30
2016-06-18 10:00:00,0.145900697,14.39999962,0.899695039,16.79999924,100.4704437,135.4980469,0.349999994,1.100000024,195,,-70,0.134704471,14.5,0.868310332,16.79999924,100.5437241,130.0048828,0.370000005,1.299999952,183,,-35,0.129014403,15.5,0.810531855,17.60000038,100.5144119,179.4433594,1.429999948,5.599999905,207,,0,0.232008114,16.79999924,0.800064862,18,100.4997559,565.7958984,1.980000019,6.5,201,,15,0.264019698,16.29999924,0.795467913,17.79999924,100.4118195,547.4853516,2.25999999,7,199,,30
2016-06-18 11:00:00,0.143766493,14.39999962,0.803864121,18.39999962,100.4997559,131.8359375,0.419999987,1.600000024,222,,-70,0.133833081,14.5,0.774981976,18.70000076,100.5583801,360.7177734,0.409999996,1.299999952,213,,-35,0.129014403,15.69999981,0.733265519,19,100.529068,320.4345703,1.370000005,5.5,215,,0,0.230246738,17.39999962,0.719612002,19.5,100.529068,648.1933594,1.850000024,6.199999809,199,,15,0.263050139,16.79999924,0.710741282,19.29999924,100.4411316,640.8691406,2.130000114,7.300000191,200,,30
2016-06-18 12:00:00,0.141623303,14.39999962,0.724151492,19.29999924,100.529068,157.4707031,0.460000008,1.700000048,195,,-70,0.130332962,14.5,0.710741282,19.29999924,100.5876923,157.4707031,0.479999989,1.5,178,,-35,0.129014403,16,0.670792997,19.39999962,100.5583801,258.1787109,2.119999886,7.5,203,,0,0.228477523,18.29999924,0.663207114,19.89999962,100.5583801,510.8642578,2.50999999,6.300000191,202,,15,0.262402296,17.5,0.667124569,19.70000076,100.4704437,525.5126953,2.609999895,6.900000095,197,,30
2016-06-18 13:00:00,0.140763521,14.5,0.742440343,18.89999962,100.5437241,51.26953125,0.379999995,1.399999976,227,,-70,0.12813352,14.60000038,0.737857401,18.89999962,100.6023483,54.93164063,0.430000007,1.700000048,198,,-35,0.128574133,16.20000076,0.679197788,19.20000076,100.5730362,58.59375,1.389999986,5.5,210,,0,0.22670044,18.89999962,0.671049237,19.5,100.5876923,223.3886719,1.870000005,5,205,,15,0.261428356,17.89999962,0.666350663,19.39999962,100.4997559,241.6992188,2.119999886,5.800000191,205,,30
2016-06-18 14:00:00,0.140333071,14.60000038,0.880148113,17.60000038,100.5583801,60.42480469,0.349999994,1.100000024,233,0.1,-70,0.126809448,14.80000019,0.870707631,17.5,100.6316528,64.08691406,0.400000006,1.700000048,215,,-35,0.128574133,16.39999962,0.835085034,17.70000076,100.6169968,56.76269531,0.620000005,3.799999952,244,,0,0.227056473,19.10000038,0.804163098,18.29999924,100.6023483,232.5439453,0.839999974,4.800000191,213,,15,0.260451734,18.10000038,0.790072978,18.20000076,100.4997559,252.6855469,1.269999981,4.199999809,203,,30
2016-06-18 15:00:00,0.139902279,14.69999981,0.784263194,18.70000076,100.5437241,106.2011719,0.349999994,1.200000048,220,,-70,0.125482067,14.89999962,0.775176585,18.60000038,100.6023483,135.4980469,0.419999987,1.299999952,186,,-35,0.128574133,16.5,0.719423115,18.79999924,100.5730362,78.73535156,1.330000043,4.5,205,,0,0.22598739,19.10000038,0.69321698,19.60000038,100.5876923,507.2021484,1.590000033,4.300000191,201,,15,0.259472489,18.20000076,0.688829541,19.60000038,100.4850998,536.4990234,1.74000001,4.400000095,197,,30
2016-06-18 16:00:00,0.138607711,14.80000019,0.710339785,20.10000038,100.5583801,86.05957031,0.439999998,1.299999952,261,,-70,0.124151386,15,0.710470617,20,100.6169968,95.21484375,0.319999993,1.5,222,,-35,0.12813352,16.60000038,0.689072132,20.10000038,100.6023483,54.93164063,0.730000019,4.300000191,251,,0,0.224557519,19.20000076,0.659939826,20.89999962,100.6023483,364.3798828,0.819999993,4.199999809,211,,15,0.258818179,18.5,0.643914342,21.20000076,100.5144119,532.8369141,1.029999971,4.400000095,194,,30
2016-06-18 17:00:00,0.137742862,14.89999962,0.792473316,19,100.5876923,29.296875,0.449999988,1,242,0.1,-70,0.12326242,15.10000038,0.802018881,18.89999962,100.660965,38.45214844,0.319999993,1,193,,-35,0.12813352,16.70000076,0.765146613,19,100.6316528,21.97265625,0.589999974,2.299999952,246,,0,0.223840684,19.29999924,0.746312737,19.39999962,100.6316528,98.87695313,0.790000021,2.700000048,212,,15,0.257834464,18.89999962,0.724026799,19.5,100.5437241,139.1601563,0.860000014,3,205,0.2,30
2016-06-18 18:00:00,0.138607711,14.89999962,0.948281646,16.60000038,100.5876923,31.12792969,0.25999999,0.699999988,229,0.1,-70,0.122817382,15.19999981,0.943668664,16.5,100.675621,34.79003906,0.300000012,1.200000048,197,,-35,0.127692536,16.70000076,0.921218336,16.70000076,100.6316528,29.296875,0.560000002,2.599999905,229,,0,0.22598739,19.20000076,0.909014225,17,100.6463089,117.1875,0.660000026,2.599999905,229,0.4,15,0.257177174,19.10000038,0.893009365,17.10000038,100.5437241,148.3154297,0.699999988,2.400000095,214,0.4,30
2016-06-18 19:00:00,0.138175473,15,0.965827584,17,100.5876923,25.63476563,0.25999999,0.600000024,173,,-70,0.121480055,15.30000019,0.960662782,17,100.675621,27.46582031,0.280000001,0.600000024,165,,-35,0.127692536,16.70000076,0.928935051,17.10000038,100.6463089,25.63476563,0.280000001,0.600000024,266,,0,0.225273088,19.10000038,0.900038481,17.60000038,100.6316528,82.39746094,0.330000013,0.899999976,253,,15,0.256848097,19,0.872798026,18,100.5437241,113.5253906,0.349999994,1.100000024,234,,30
2016-06-18 20:00:00,0.137742862,15,0.955497921,17,100.6023483,9.155273438,0.219999999,0.600000024,216,,-70,0.120586656,15.30000019,0.951179504,16.89999962,100.6902771,12.81738281,0.25999999,0.5,200,,-35,0.127692536,16.70000076,0.935586393,16.89999962,100.6463089,14.6484375,0.379999995,0.699999988,277,,0,0.224199265,19,0.907117844,17.29999924,100.660965,51.26953125,0.419999987,0.800000012,271,,15,0.256518722,19,0.902050138,17.29999924,100.5583801,64.08691406,0.400000006,0.800000012,266,,30
2016-06-18 21:00:00,0.137742862,15,0.985365331,16.60000038,100.660965,10.98632813,0.270000011,0.800000012,205,,-70,0.119243778,15.39999962,0.98098886,16.5,100.7195892,12.81738281,0.25999999,0.699999988,175,,-35,0.127692536,16.70000076,0.952803016,16.70000076,100.675621,10.98632813,0.469999999,2.400000095,247,,0,0.223122582,18.79999924,0.934067249,17.10000038,100.6902771,45.77636719,0.579999983,2.099999905,244,,15,0.255859047,18.79999924,0.929673612,17,100.6023483,54.93164063,0.540000021,1.899999976,230,,30
2016-06-18 22:00:00,0.137309894,15,0.976521313,16.39999962,100.675621,0,0.310000002,0.800000012,201,,-70,0.118346676,15.39999962,0.966561735,16.29999924,100.7489014,0,0.310000002,0.699999988,181,,-35,0.127251178,16.70000076,0.93300575,16.5,100.7049332,0,0.389999986,1.5,253,,0,0.222043037,18.5,0.910156608,16.79999924,100.7195892,1.831054688,0.600000024,1.700000048,234,,15,0.254867315,18.70000076,0.905900359,16.60000038,100.6169968,1.831054688,0.800000012,2.5,219,,30
2016-06-18 23:00:00,0.13644287,15,0.997661293,15,100.7342453,0,0.449999988,0.899999976,232,,-70,0.117448084,15.39999962,0.992293298,14.89999962,100.7928696,0,0.300000012,0.800000012,184,,-35,0.127251178,16.70000076,0.973769784,15.10000038,100.7635574,0,0.469999999,1.100000024,262,,0,0.221321747,18.29999924,0.961333454,15.30000019,100.7635574,0,0.560000002,1.399999976,240,,15,0.253872901,18.5,0.944354832,15.19999981,100.675621,0,0.74000001,2,225,,30
2016-06-19 00:00:00,0.136008814,15,1.007916451,14,100.7635574,0,0.389999986,0.699999988,233,,-70,0.116548009,15.30000019,1.008177996,13.89999962,100.8221817,0,0.300000012,0.600000024,179,,-35,0.127251178,16.60000038,0.99539578,14,100.7782135,0,0.409999996,0.800000012,262,,0,0.221321747,18,0.995181561,14.10000038,100.7928696,0,0.479999989,1,239,,15,0.252875805,18.20000076,0.976614714,14,100.6902771,0,0.569999993,1.399999976,232,,30
2016-06-19 01:00:00,0.135574386,14.89999962,1.022114992,13.30000019,100.7489014,0,0.330000013,0.699999988,235,,-70,0.115195103,15.30000019,1.015617013,13.19999981,100.8075256,0,0.300000012,0.600000024,173,,-35,0.127251178,16.60000038,1.009010911,13.30000019,100.7782135,0,0.340000004,0.800000012,256,,0,0.220599189,17.70000076,1.008962393,13.39999962,100.7928696,0,0.430000007,1.399999976,216,,15,0.251875997,17.89999962,0.995832264,13.19999981,100.6902771,0,0.5,1.899999976,223,,30
2016-06-19 02:00:00,0.135139614,14.89999962,1.022276878,12.89999962,100.7782135,0,0.360000014,0.800000012,245,,-70,0.114743389,15.19999981,1.022221327,12.80000019,100.8368378,0,0.270000011,0.699999988,183,,-35,0.126809448,16.5,1.015551329,12.89999962,100.8221817,0,0.449999988,0.899999976,265,,0,0.220237434,17.39999962,1.015611768,13,100.8221817,0,0.379999995,1.100000024,257,,15,0.250873476,17.60000038,0.995142639,12.80000019,100.7342453,0,0.50999999,2.400000095,239,,30
2016-06-19 03:00:00,0.134704471,14.89999962,1.035623312,12.5,100.8075256,0,0.49000001,0.899999976,255,,-70,0.113838844,15.19999981,1.028547406,12.39999962,100.8661423,0,0.25,0.5,196,,-35,0.12636736,16.39999962,1.021815062,12.5,100.8368378,0,0.469999999,0.899999976,270,,0,0.220237434,17.10000038,1.021991014,12.60000038,100.8368378,0,0.430000007,0.800000012,263,,15,0.250203609,17.39999962,1.000748873,12.39999962,100.7342453,0,0.389999986,0.899999976,228,,30
2016-06-19 04:00:00,0.134268954,14.80000019,1.027438283,12,100.8368378,0,0.50999999,0.899999976,247,,-70,0.112932801,15.10000038,1.027052402,11.89999962,100.8954544,0,0.310000002,0.5,189,,-35,0.1259249,16.29999924,1.020303249,12,100.8514862,0,0.479999989,1,262,,0,0.219875365,16.89999962,1.020691991,12.10000038,100.8514862,0,0.379999995,0.699999988,250,,15,0.249532565,17.10000038,1.0055058,11.89999962,100.7489014,0,0.469999999,0.899999976,227,,30
2016-06-19 05:00:00,0.133833081,14.69999981,1.032949805,11.60000038,100.8514862,0,0.50999999,1,248,,-70,0.111570932,15,1.025623918,11.60000038,100.9247665,0,0.300000012,0.699999988,197,,-35,0.1259249,16.20000076,1.025623918,11.60000038,100.8807983,1.831054688,0.529999971,1,265,,0,0.219875365,16.70000076,1.019870162,11.89999962,100.8807983,1.831054688,0.419999987,0.899999976,252,,15,0.248860314,16.79999924,1.010972142,11.60000038,100.7782135,1.831054688,0.5,1,226,,30
2016-06-19 06:00:00,0.133396849,14.69999981,1.032949805,11.60000038,100.8954544,1.831054688,0.449999988,1,241,,-70,0.11111623,14.89999962,1.032429814,11.5,100.9687347,7.32421875,0.330000013,0.600000024,187,,-35,0.1259249,16.10000038,0.993356705,12.30000019,100.9394226,56.76269531,0.600000024,1,265,,0,0.220599189,16.5,1.008006692,12.5,100.9247665,82.39746094,0.419999987,0.899999976,236,,15,0.248523727,16.60000038,0.999911964,12.19999981,100.8221817,65.91796875,0.519999981,1.100000024,216,,30
2016-06-19 07:00:00,0.132960245,14.60000038,1.03512013,12.19999981,100.9687347,16.47949219,0.389999986,0.899999976,237,,-70,0.110205702,14.89999962,1.03512013,12.19999981,101.0420151,27.46582031,0.319999993,0.699999988,183,,-35,0.1259249,16,0.963396311,13.39999962,100.9833908,106.2011719,0.589999974,1.200000048,269,,0,0.219150245,16.29999924,0.951642334,14.10000038,100.9980469,166.6259766,0.430000007,1.200000048,233,,15,0.247849643,16.39999962,0.957529724,13.69999981,100.8954544,150.1464844,0.49000001,1.299999952,222,,30
2016-06-19 08:00:00,0.132523268,14.5,1.038720727,14.10000038,101.0127029,25.63476563,0.389999986,0.899999976,248,,-70,0.109749876,14.80000019,1.025832057,14.19999981,101.0713272,47.60742188,0.300000012,0.800000012,200,,-35,0.125482067,15.89999962,0.931380808,15.69999981,101.0420151,150.1464844,0.670000017,1.399999976,275,,0,0.217696175,16.39999962,0.894004762,16.89999962,101.0420151,351.5625,0.469999999,2.700000048,244,,15,0.247512162,16.29999924,0.896038771,16.39999962,100.9540787,311.2792969,0.639999986,2.700000048,207,,30
2016-06-19 09:00:00,0.132523268,14.5,0.939562798,16.29999924,101.0713272,47.60742188,0.330000013,0.800000012,229,,-70,0.109293669,14.69999981,0.917011321,16.5,101.1299438,75.07324219,0.289999992,1,186,,-35,0.125038877,15.89999962,0.814611495,18,101.1006317,168.4570313,0.720000029,2.900000095,235,,0,0.216602266,16.70000076,0.769701064,19,101.0859833,384.5214844,0.730000019,3.200000048,204,,15,0.247174367,16.39999962,0.77984637,18.60000038,101.0127029,362.5488281,0.779999971,3,196,,30
2016-06-19 10:00:00,0.132085949,14.5,0.879557073,17.70000076,101.1152878,122.6806641,0.389999986,1.5,223,,-70,0.108380139,14.69999981,0.859301746,17.79999924,101.173912,97.04589844,0.449999988,1.399999976,194,,-35,0.124595322,16,0.794406891,18.39999962,101.159256,142.8222656,1.330000043,3.599999905,200,,0,0.216236979,17.29999924,0.783687055,18.89999962,101.159256,435.7910156,1.299999952,4,196,,15,0.246497869,16.60000038,0.783687055,18.89999962,101.0566711,433.9599609,1.299999952,4.199999809,190,,30
2016-06-19 11:00:00,0.131648242,14.5,0.742169797,19.20000076,101.1152878,120.8496094,0.449999988,1.399999976,235,,-70,0.107922807,14.69999981,0.724026799,19.5,101.1885681,287.4755859,0.419999987,1.799999952,192,,-35,0.124595322,16.20000076,0.69333148,19.79999924,101.173912,346.0693359,1.070000052,4,223,,0,0.216236979,17.89999962,0.672243059,20.60000038,101.159256,595.0927734,1.139999986,4.699999809,193,,15,0.24582015,17.20000076,0.66806221,20.39999962,101.0713272,589.5996094,1.100000024,3.700000048,186,,30
2016-06-19 12:00:00,0.132523268,14.5,0.710186899,20.20000076,101.159256,223.3886719,0.50999999,1.700000048,258,,-70,0.107007027,14.69999981,0.697408497,20.29999924,101.2178802,173.9501953,0.389999986,1.299999952,213,,-35,0.124595322,16.39999962,0.676413,20.39999962,101.2032242,377.1972656,1.00999999,4.800000191,237,,0,0.215505451,18.79999924,0.659876823,21.10000038,101.1885681,582.2753906,1.190000057,4.800000191,206,,15,0.245480835,18,0.659938812,20.79999924,101.1006317,595.0927734,1.360000014,5.5,194,,30
2016-06-19 13:00:00,0.133396849,14.60000038,0.697664797,19.79999924,101.173912,130.0048828,0.550000012,1.899999976,257,,-70,0.106548563,14.80000019,0.697646618,19.70000076,101.2471924,161.1328125,0.360000014,1.299999952,238,,-35,0.124151386,16.60000038,0.684739828,19.89999962,101.2325363,91.55273438,0.720000029,3.200000048,260,,0,0.214772642,19.5,0.655746281,20.60000038,101.2178802,481.5673828,0.910000026,4.199999809,201,,15,0.244801298,18.60000038,0.651503026,20.5,101.1299438,507.2021484,1.039999962,5,194,,30
2016-06-19 14:00:00,0.134268954,14.69999981,0.639880538,21.10000038,101.1885681,128.1738281,0.540000021,1.899999976,276,,-70,0.106089734,14.89999962,0.643879771,21.10000038,101.2325363,170.2880859,0.360000014,1.100000024,200,,-35,0.124151386,16.79999924,0.627882779,21.10000038,101.2325363,95.21484375,0.779999971,2.799999952,226,,0,0.214772642,19.89999962,0.598148227,22.10000038,101.2178802,613.4033203,1.019999981,4.300000191,185,,15,0.243779689,19,0.601534128,21.79999924,101.1445999,642.7001953,1.070000052,4.699999809,177,,30
2016-06-19 15:00:00,0.134268954,14.80000019,0.631990016,21.20000076,101.173912,128.1738281,0.439999998,1.700000048,259,,-70,0.105170928,15.10000038,0.635775626,21,101.2325363,137.3291016,0.289999992,1.399999976,222,,-35,0.124151386,17,0.623883545,21.10000038,101.2178802,87.890625,0.689999998,3.200000048,257,,0,0.214405745,20.29999924,0.594064474,21.89999962,101.2178802,476.0742188,0.970000029,4,188,,15,0.242755339,19.5,0.57883203,21.89999962,101.1299438,527.34375,0.970000029,3.700000048,172,,30
2016-06-19 16:00:00,0.134268954,14.89999962,0.615885019,21.10000038,101.1885681,76.90429688,0.479999989,1.5,265,,-70,0.104710966,15.19999981,0.623703957,21,101.2471924,80.56640625,0.289999992,1.200000048,251,,-35,0.124151386,17.10000038,0.615885019,21.10000038,101.2471924,62.25585938,0.579999983,2.099999905,274,,0,0.213670999,20.5,0.597702682,21.79999924,101.2325363,349.7314453,0.579999983,2.599999905,209,,15,0.242070913,19.89999962,0.57854557,21.79999924,101.1445999,397.3388672,0.699999988,4.199999809,145,,30
2016-06-19 17:00:00,0.134268954,15,0.63969624,20.89999962,101.2032242,84.22851563,0.409999996,1.100000024,271,,-70,0.103789896,15.39999962,0.65171814,20.70000076,101.2765045,87.890625,0.230000004,0.899999976,232,,-35,0.124151386,17.10000038,0.643744946,20.89999962,101.2618484,64.08691406,0.50999999,1.700000048,277,,0,0.213303134,20.5,0.612671077,21.5,101.2471924,260.0097656,0.600000024,2.799999952,187,,15,0.240698382,20.20000076,0.585661888,21.60000038,101.159256,373.5351563,0.720000029,3.599999905,122,,30
2016-06-19 18:00:00,0.134268954,15.10000038,0.676413,20.39999962,101.1885681,38.45214844,0.449999988,1.600000024,269,,-70,0.102405466,15.5,0.684804678,20.29999924,101.2618484,40.28320313,0.25999999,1,243,,-35,0.124151386,17.20000076,0.659802437,20.5,101.2471924,32.95898438,0.529999971,1.899999976,284,,0,0.21256645,20.5,0.651791453,20.79999924,101.2325363,113.5253906,0.550000012,2.5,6,,15,0.239665747,20.29999924,0.607886493,21.10000038,101.1445999,219.7265625,0.709999979,3.599999905,67,,30
2016-06-19 19:00:00,0.134268954,15.19999981,0.719658673,19.39999962,101.2178802,23.80371094,0.419999987,1.200000048,273,,-70,0.101480618,15.60000038,0.728621542,19.29999924,101.2911606,23.80371094,0.230000004,1,242,,-35,0.124151386,17.29999924,0.701889336,19.39999962,101.2618484,20.14160156,0.5,1.5,281,,0,0.212197617,20.39999962,0.706367195,19.70000076,101.2618484,93.38378906,0.349999994,2.299999952,323,,15,0.238284603,20.29999924,0.684565723,19.70000076,101.173912,111.6943359,0.529999971,2.700000048,51,,30
2016-06-19 20:00:00,0.134268954,15.19999981,0.742284119,19.10000038,101.2178802,20.14160156,0.419999987,1.200000048,275,,-70,0.100554258,15.69999981,0.751606286,18.89999962,101.2911606,20.14160156,0.230000004,1.200000048,232,,-35,0.123707086,17.29999924,0.724179626,19.10000038,101.2618484,16.47949219,0.460000008,1.600000024,278,,0,0.212197617,20.10000038,0.724151492,19.29999924,101.2765045,64.08691406,0.370000005,3,357,,15,0.2372455,20.20000076,0.688562334,19.39999962,101.1885681,80.56640625,0.560000002,3.200000048,56,,30
2016-06-19 21:00:00,0.134268954,15.19999981,0.780496359,18.20000076,101.2911606,5.493164063,0.340000004,0.899999976,262,,-70,0.099161871,15.69999981,0.805113912,17.89999962,101.3497772,7.32421875,0.189999998,0.600000024,186,,-35,0.12326242,17.29999924,0.770958841,18.10000038,101.3204727,5.493164063,0.310000002,1,268,,0,0.211458996,19.89999962,0.77570802,18.20000076,101.3351212,27.46582031,0.230000004,1.399999976,256,,15,0.236551225,20,0.737663567,18.39999962,101.2325363,32.95898438,0.340000004,2.099999905,83,,30
2016-06-19 22:00:00,0.134268954,15.19999981,0.795387447,17,101.3351212,0,0.439999998,0.899999976,260,,-70,0.097766064,15.69999981,0.800310135,16.79999924,101.3937454,0,0.230000004,0.600000024,223,,-35,0.122817382,17.29999924,0.795248389,16.89999962,101.3644333,0,0.310000002,0.800000012,275,,0,0.211089194,19.5,0.836992681,16.70000076,101.3644333,0,0.170000002,0.600000024,220,,15,0.235507473,19.70000076,0.800143957,16.70000076,101.2618484,0,0.230000004,1.299999952,197,,30
2016-06-19 23:00:00,0.134268954,15.19999981,0.829730213,15.5,101.3644333,0,0.569999993,1.100000024,261,,-70,0.09730003,15.69999981,0.829349756,15.39999962,101.4230576,0,0.360000014,0.899999976,241,,-35,0.122817382,17.20000076,0.818364024,15.5,101.3937454,0,0.389999986,1,273,,0,0.210719064,19.20000076,0.88615799,15,101.4230576,0,0.289999992,1.100000024,202,,15,0.234460935,19.39999962,0.839657784,15.10000038,101.3058167,0,0.319999993,1.600000024,170,,30
2016-06-20 00:00:00,0.134268954,15.19999981,0.884135306,14.30000019,101.4084015,0,0.560000002,1.100000024,259,,-70,0.09636683,15.69999981,0.883698702,14.19999981,101.4816818,0,0.430000007,0.699999988,241,,-35,0.122817382,17.10000038,0.866233289,14.39999962,101.4523697,0,0.419999987,0.800000012,273,,0,0.210719064,18.79999924,0.914323032,14.10000038,101.4523697,0,0.389999986,1,215,,15,0.233411595,19,0.895230174,14,101.3351212,0,0.439999998,1.200000048,192,,30
2016-06-20 01:00:00,0.134268954,15.19999981,0.905952275,13.60000038,101.4523697,0,0.74000001,1.299999952,266,,-70,0.094964169,15.60000038,0.898935258,13.5,101.52565,0,0.389999986,1,249,,-35,0.122371979,17.10000038,0.893101871,13.60000038,101.4963379,0,0.540000021,1.100000024,277,,0,0.210719064,18.39999962,0.924339712,13.39999962,101.4963379,0,0.330000013,1.200000048,246,,15,0.232710481,18.60000038,0.91073066,13.30000019,101.3937454,0,0.360000014,1.899999976,175,,30
2016-06-20 02:00:00,0.134268954,15.10000038,0.923288226,13.19999981,101.4523697,0,0.360000014,1,267,,-70,0.094495848,15.5,0.91606158,13.10000038,101.52565,0,0.219999999,0.600000024,169,,-35,0.122371979,16.89999962,0.903503478,13.19999981,101.4816818,0,0.300000012,1,286,,0,0.210348621,18.10000038,0.935431898,13,101.4816818,0,0.25,0.800000012,313,,15,0.231656462,18.29999924,0.908705294,13,101.4084015,0,0.400000006,1.700000048,17,,30
2016-06-20 03:00:00,0.134268954,15.10000038,0.945151687,12.39999962,101.3937454,0,0.379999995,0.800000012,250,,-70,0.094027147,15.39999962,0.93739295,12.30000019,101.4670258,0,0.25,0.600000024,177,,-35,0.121480055,16.79999924,0.936537266,12.19999981,101.4377136,0,0.460000008,1,261,,0,0.209977835,17.70000076,0.94438839,12.30000019,101.4377136,0,0.389999986,1.100000024,246,,15,0.230952233,17.89999962,0.941818416,12,101.3644333,0,0.379999995,1,266,,30
2016-06-20 04:00:00,0.134268954,15,0.979898512,11.39999962,101.3497772,0,0.519999981,1,255,,-70,0.093088605,15.39999962,0.971465647,11.30000019,101.4377136,0,0.300000012,0.600000024,202,,-35,0.121480055,16.70000076,0.957628071,11.39999962,101.3937454,0,0.49000001,1,264,,0,0.209606737,17.39999962,0.965051532,11.39999962,101.4084015,0,0.519999981,1,230,,15,0.230246738,17.60000038,0.961719811,11.10000038,101.3204727,0,0.439999998,1.100000024,211,,30
2016-06-20 05:00:00,0.134268954,14.89999962,0.995414019,10.69999981,101.3644333,0,0.660000026,1.100000024,263,,-70,0.092618756,15.19999981,0.987637341,10.69999981,101.4230576,0,0.280000001,0.600000024,228,,-35,0.121033542,16.60000038,0.979860663,10.69999981,101.3790894,0,0.600000024,1,276,,0,0.209606737,17.10000038,0.988810539,10.80000019,101.3937454,1.831054688,0.479999989,1.100000024,269,,15,0.22989352,17.29999924,0.978581011,10.60000038,101.3058167,0,0.340000004,0.899999976,243,,30
2016-06-20 06:00:00,0.134268954,14.80000019,1.003190756,10.69999981,101.3644333,1.831054688,0.579999983,1,261,,-70,0.091677912,15.19999981,0.995414019,10.69999981,101.4230576,5.493164063,0.289999992,0.600000024,219,,-35,0.121033542,16.5,0.957628071,11.39999962,101.3937454,58.59375,0.649999976,1.100000024,277,,0,0.209606737,16.89999962,0.947094738,11.80000019,101.3937454,78.73535156,0.449999988,1.100000024,270,,15,0.22953999,17,0.958684802,11.5,101.3204727,62.25585938,0.330000013,0.899999976,231,,30
2016-06-20 07:00:00,0.134268954,14.80000019,1.002168894,11.39999962,101.3937454,9.155273438,0.460000008,0.800000012,262,,-70,0.091206916,15.10000038,0.988182783,11.5,101.4670258,29.296875,0.219999999,0.600000024,207,,-35,0.121033542,16.29999924,0.890313625,13.19999981,101.4230576,179.4433594,0.610000014,1.100000024,283,,0,0.209606737,16.70000076,0.876449108,14,101.4230576,203.2470703,0.389999986,1.100000024,280,,15,0.228831992,16.70000076,0.875219703,13.80000019,101.3351212,172.1191406,0.300000012,1,261,,30
2016-06-20 08:00:00,0.134268954,14.69999981,0.956262767,13.19999981,101.3790894,23.80371094,0.379999995,1.200000048,273,,-70,0.091206916,15,0.930849135,13.39999962,101.4523697,47.60742188,0.230000004,1.100000024,213,,-35,0.121033542,16.20000076,0.797216117,15.80000019,101.4084015,173.9501953,0.5,2.5,296,,0,0.209606737,16.70000076,0.778393328,16.5,101.4230576,357.0556641,0.49000001,2.400000095,356,,15,0.228477523,16.60000038,0.777107298,16.20000076,101.3204727,309.4482422,0.610000014,3.400000095,22,,30
2016-06-20 09:00:00,0.134268954,14.60000038,0.784901798,15.60000038,101.3497772,62.25585938,0.330000013,1.200000048,45,,-70,0.09073554,14.89999962,0.770577312,16,101.4084015,100.7080078,0.379999995,1.299999952,116,,-35,0.120139405,16.20000076,0.706887484,16.89999962,101.3790894,217.8955078,1.190000057,2.900000095,78,,0,0.209235311,17,0.68190378,17.70000076,101.3937454,498.046875,0.879999995,2.5,56,,15,0.228122726,16.60000038,0.698679864,17.20000076,101.2911606,454.1015625,1.039999962,2.900000095,51,,30
2016-06-20 10:00:00,0.134704471,14.60000038,0.681244612,17.60000038,101.3497772,212.4023438,0.349999994,1.100000024,130,,-70,0.089791626,14.80000019,0.681244612,17.60000038,101.4084015,148.3154297,0.540000021,1.299999952,125,,-35,0.120139405,16.29999924,0.656381667,17.60000038,101.3790894,261.8408203,1.120000005,2.5,125,,0,0.209235311,17.60000038,0.618700266,18.89999962,101.3937454,648.1933594,0.75999999,2.400000095,132,,15,0.227412209,16.79999924,0.635763645,18.70000076,101.2911606,613.4033203,0.75,2.400000095,119,,30
2016-06-20 11:00:00,0.134704471,14.5,0.631801069,18.79999924,101.3058167,150.1464844,0.419999987,1.399999976,255,,-70,0.089791626,14.80000019,0.620723784,19.20000076,101.3644333,404.6630859,0.460000008,1.200000048,143,,-35,0.120139405,16.5,0.609534383,18.89999962,101.3497772,411.9873047,1.340000033,4.099999905,159,,0,0.209235311,18.29999924,0.585689425,19.89999962,101.3497772,770.8740234,1.179999948,3.400000095,163,,15,0.227056473,17.5,0.594302475,19.89999962,101.2618484,754.3945313,1.00999999,3.700000048,148,,30
2016-06-20 12:00:00,0.135139614,14.60000038,0.56997323,20.10000038,101.2618484,303.9550781,0.430000007,1.899999976,202,,-70,0.089791626,14.80000019,0.56997323,20.10000038,101.3351212,261.8408203,0.430000007,1.5,159,,-35,0.119691774,16.79999924,0.566837847,19.70000076,101.3204727,514.5263672,1.519999981,5.5,195,,0,0.209235311,19.29999924,0.556765735,20.60000038,101.3058167,856.9335938,1.5,4.5,198,,15,0.22670044,18.39999962,0.561543286,20.70000076,101.2178802,842.2851563,1.330000043,4.800000191,188,,30
2016-06-20 13:00:00,0.135574386,14.69999981,0.551273823,21,101.2471924,223.3886719,0.419999987,1.5,210,,-70,0.089319095,14.89999962,0.558722019,20.89999962,101.3058167,216.0644531,0.529999971,1.5,158,,-35,0.119691774,17.10000038,0.560672581,20,101.2911606,113.5253906,2.180000067,5.800000191,193,,0,0.209235311,20.20000076,0.555297732,21,101.2765045,807.4951172,1.99000001,4.699999809,196,,15,0.226344079,19.20000076,0.559321582,21,101.1885681,820.3125,1.879999995,4.699999809,183,,30
2016-06-20 14:00:00,0.135574386,14.80000019,0.567169547,20.29999924,101.1885681,124.5117188,0.400000006,1.5,194,,-70,0.088846177,15.10000038,0.56997323,20.10000038,101.2618484,126.3427734,0.430000007,1.200000048,167,,-35,0.119691774,17.29999924,0.547832787,20,101.2471924,95.21484375,1.50999999,5.199999809,201,,0,0.208863556,20.89999962,0.545147836,20.70000076,101.2325363,455.9326172,1.570000052,5.300000191,200,,15,0.225630403,19.79999924,0.545875311,20.79999924,101.1445999,496.2158203,1.440000057,4.699999809,191,,30
2016-06-20 15:00:00,0.136008814,14.89999962,0.556469202,21.20000076,101.1445999,181.2744141,0.389999986,1.299999952,178,,-70,0.088372879,15.19999981,0.562770724,20.89999962,101.2032242,161.1328125,0.50999999,1.299999952,151,,-35,0.119691774,17.5,0.527896404,20.60000038,101.2032242,98.87695313,2.059999943,5.5,193,,0,0.208119079,21.10000038,0.530055404,21.39999962,101.1885681,556.640625,2.059999943,6.099999905,199,,15,0.22491546,20.10000038,0.531362116,21.60000038,101.1006317,602.4169922,1.909999967,5.5,190,,30
2016-06-20 16:00:00,0.136008814,15,0.596216977,21.20000076,101.0859833,104.3701172,0.49000001,1.299999952,125,,-70,0.088372879,15.39999962,0.59111172,20.89999962,101.1445999,98.87695313,0.720000029,1.5,130,,-35,0.119691774,17.5,0.570317507,20.79999924,101.1445999,65.91796875,2.400000095,5.599999905,182,,0,0.208119079,21.20000076,0.569745064,21.5,101.1299438,379.0283203,1.960000038,5.199999809,189,,15,0.223840684,20.29999924,0.567741394,22,101.0420151,593.2617188,1.649999976,4.5,170,,30
2016-06-20 17:00:00,0.13644287,15.10000038,0.58209151,21.70000076,100.9980469,124.5117188,0.449999988,1.600000024,163,,-70,0.087899193,15.60000038,0.5662691,21.60000038,101.0566711,212.4023438,0.610000014,1.5,147,,-35,0.119691774,17.60000038,0.548519611,21.20000076,101.0420151,53.10058594,2.400000095,5.5,191,,0,0.207746357,21,0.558511972,21.60000038,101.0566711,151.9775391,2.170000076,5.300000191,200,,15,0.222763047,20.60000038,0.540448546,22.70000076,100.9687347,562.1337891,1.850000024,4.900000095,184,,30
2016-06-20 18:00:00,0.13644287,15.19999981,0.627124965,20.70000076,100.9247665,56.76269531,0.419999987,1.5,132,,-70,0.087899193,15.69999981,0.610380173,20.60000038,100.9687347,62.25585938,0.660000026,1.399999976,132,,-35,0.119243778,17.5,0.582037568,20.70000076,100.9540787,36.62109375,2.230000019,5.199999809,182,,0,0.206999913,20.79999924,0.595160425,20.89999962,100.9687347,126.3427734,1.860000014,4.199999809,189,,15,0.222043037,20.79999924,0.592571199,21.29999924,100.8807983,276.4892578,1.74000001,4.599999905,171,,30
2016-06-20 19:00:00,0.13644287,15.19999981,0.663686574,20.20000076,100.8661423,25.63476563,0.300000012,1.100000024,144,,-70,0.087899193,15.80000019,0.634389639,20.29999924,100.9101105,29.296875,0.600000024,1.799999952,135,,-35,0.119243778,17.5,0.601706624,20.5,100.8954544,20.14160156,2.49000001,4.699999809,188,,0,0.206626207,20.5,0.618305445,20.5,100.8954544,60.42480469,2.109999895,4.5,197,,15,0.220960632,20.70000076,0.623026133,20.70000076,100.8075256,109.8632813,1.769999981,4.900000095,178,,30
2016-06-20 20:00:00,0.13644287,15.30000019,0.701889336,19.39999962,100.8368378,9.155273438,0.200000003,0.600000024,187,,-70,0.086950675,15.80000019,0.679677665,19.39999962,100.8954544,10.98632813,0.430000007,0.899999976,142,,-35,0.118795417,17.5,0.628754795,19.89999962,100.8807983,9.155273438,2.210000038,4.099999905,192,,0,0.206626207,20.10000038,0.649998248,19.79999924,100.8807983,31.12792969,1.940000057,3.700000048,199,,15,0.219875365,20.5,0.66689229,19.60000038,100.7928696,47.60742188,1.5,3.299999952,185,,30
2016-06-20 21:00:00,0.13644287,15.30000019,0.746866345,18.10000038,100.8221817,0,0.230000004,0.5,205,,-70,0.086475834,15.89999962,0.741878331,18,100.9101105,0,0.340000004,0.800000012,147,,-35,0.118346676,17.39999962,0.68136543,18.5,100.8807983,0,1.690000057,2.799999952,193,,0,0.206626207,19.79999924,0.71795541,18.10000038,100.8661423,7.32421875,1.529999971,2.299999952,208,,15,0.218787208,20.10000038,0.746141076,17.70000076,100.7782135,10.98632813,1.139999986,3,202,,30
2016-06-20 22:00:00,0.136876568,15.30000019,0.779386997,16.79999924,100.8661423,0,0.25,0.5,196,,-70,0.086475834,15.89999962,0.799947083,16.60000038,100.9247665,0,0.319999993,0.899999976,148,,-35,0.117897563,17.39999962,0.724680722,17.29999924,100.8954544,0,1.649999976,2.700000048,194,,0,0.205877811,19.39999962,0.758864522,16.89999962,100.8954544,0,1.549999952,2.5,212,,15,0.217696175,19.70000076,0.804278851,16.20000076,100.7928696,0,1.120000005,2,210,,30
2016-06-20 23:00:00,0.136876568,15.30000019,0.831450462,16.20000076,100.8661423,0,0.280000001,0.699999988,141,,-70,0.086000606,15.89999962,0.809967935,16.29999924,100.9247665,0,0.639999986,1.100000024,136,,-35,0.117897563,17.29999924,0.784054101,16.60000038,100.8954544,0,2.950000048,5.300000191,191,,0,0.205503121,19,0.804825246,16.39999962,100.9101105,0,2.400000095,4.699999809,199,,15,0.216967225,19.29999924,0.820364296,16.10000038,100.7928696,0,2.109999895,4.300000191,191,,30
2016-06-21 00:00:00,0.136876568,15.30000019,0.864115357,15.80000019,100.8514862,0,0.270000011,1,186,,-70,0.085048996,15.80000019,0.852965474,15.80000019,100.9101105,0,0.519999981,1.200000048,148,,-35,0.117897563,17.20000076,0.82583338,16.10000038,100.8807983,0,2.769999981,5.5,194,,0,0.205503121,18.70000076,0.842130899,16,100.8807983,0,2.410000086,4.5,203,,15,0.216236979,19,0.852965474,15.80000019,100.7782135,0,2.230000019,4.800000191,192,,30
2016-06-21 01:00:00,0.136876568,15.19999981,0.897985578,15.39999962,100.8075256,0,0.319999993,0.699999988,201,,-70,0.084572613,15.69999981,0.880877972,15.5,100.8661423,0,0.50999999,1.100000024,163,,-35,0.117897563,17.10000038,0.858441353,15.69999981,100.8514862,0,2.220000029,4.300000191,194,,0,0.205503121,18.39999962,0.880896986,15.60000038,100.8514862,0,2.109999895,4,209,,15,0.215871379,18.60000038,0.886546314,15.39999962,100.7489014,0,1.769999981,3.5,199,,30
2016-06-21 02:00:00,0.136876568,15.19999981,0.909424901,15.39999962,100.7635574,0,0.340000004,0.800000012,187,,-70,0.084572613,15.69999981,0.897985578,15.39999962,100.8221817,0,0.579999983,1.200000048,168,,-35,0.117897563,17,0.886561036,15.5,100.8075256,0,2.200000048,4.599999905,193,,0,0.205503121,18.10000038,0.897927225,15.5,100.8075256,0,1.980000019,4.599999905,207,,15,0.215505451,18.29999924,0.903768539,15.30000019,100.7049332,0,1.730000019,4.199999809,196,,30
2016-06-21 03:00:00,0.136876568,15.10000038,0.93295306,15.10000038,100.7489014,0,0.300000012,0.699999988,205,,-70,0.084572613,15.60000038,0.921291173,15.10000038,100.8221817,0,0.610000014,1.100000024,180,,-35,0.117448084,16.89999962,0.915460229,15.10000038,100.7782135,0,1.830000043,3.5,194,,0,0.205128103,17.89999962,0.921180487,15.19999981,100.7928696,0,1.809999943,3,212,,15,0.214772642,18.10000038,0.927238166,15,100.6902771,0,1.600000024,2.900000095,201,,30
2016-06-21 04:00:00,0.13644287,15.10000038,0.944615006,15.10000038,100.7342453,0,0.370000005,0.899999976,217,,-70,0.084572613,15.5,0.93310678,15,100.8075256,0,0.610000014,1.100000024,194,,-35,0.116998233,16.79999924,0.915386915,15.19999981,100.7782135,0,1.00999999,3.400000095,205,,0,0.205128103,17.79999924,0.921038032,15.30000019,100.7782135,0,1.399999976,3.5,215,,15,0.214772642,18,0.927122116,15.10000038,100.6902771,0,1.49000001,3.200000048,209,,30
2016-06-21 05:00:00,0.13644287,15.10000038,0.950712562,15,100.7195892,0,0.330000013,0.699999988,187,,-70,0.084095843,15.5,0.938975334,15,100.7928696,0,0.610000014,1.100000024,182,,-35,0.116548009,16.70000076,0.921291173,15.10000038,100.7635574,0,1.110000014,2.599999905,197,,0,0.205128103,17.60000038,0.932767689,15.19999981,100.7635574,0,1.269999981,2.5,213,,15,0.214405745,17.79999924,0.939134717,14.89999962,100.660965,0,1.139999986,2.299999952,200,,30
2016-06-21 06:00:00,0.135574386,15,0.974573791,14.89999962,100.7195892,0,0.349999994,0.699999988,190,0.05,-70,0.083618686,15.39999962,0.963040531,14.80000019,100.7928696,0,0.589999974,1.200000048,181,0.05,-35,0.116548009,16.60000038,0.93295306,15.10000038,100.7489014,0,1.519999981,3.299999952,195,,0,0.204001084,17.5,0.95044595,15.10000038,100.7635574,3.662109375,1.559999943,2.700000048,208,,15,0.214038536,17.70000076,0.950947762,14.89999962,100.675621,3.662109375,1.5,3.599999905,198,,30
2016-06-21 07:00:00,0.135139614,15,0.986386776,14.89999962,100.7342453,0,0.370000005,1.799999952,207,,-70,0.083618686,15.30000019,0.974929929,14.80000019,100.8075256,1.831054688,0.50999999,1.700000048,179,,-35,0.116548009,16.60000038,0.926974058,15.19999981,100.7782135,1.831054688,1.559999943,5.199999809,199,,0,0.204001084,17.39999962,0.932551026,15.30000019,100.7782135,14.6484375,2.079999924,6.5,209,,15,0.213670999,17.5,0.93295306,15.10000038,100.6902771,14.6484375,2.25,7,206,,30
2016-06-21 08:00:00,0.135139614,15,0.980055511,15,100.7489014,14.6484375,0.419999987,1.200000048,215,,-70,0.083141148,15.30000019,0.968667269,14.89999962,100.8221817,18.31054688,0.600000024,1.600000024,184,,-35,0.116548009,16.5,0.944843948,15,100.7635574,18.31054688,1.960000038,5.099999905,197,,0,0.204001084,17.39999962,0.95044595,15.10000038,100.7782135,75.07324219,2.50999999,5.900000095,207,,15,0.213303134,17.5,0.950947762,14.89999962,100.6902771,78.73535156,2.710000038,7.199999809,203,,30
2016-06-21 09:00:00,0.135139614,14.89999962,0.991792738,15,100.7928696,12.81738281,0.400000006,1.299999952,199,,-70,0.083141148,15.19999981,0.992293298,14.89999962,100.8514862,16.47949219,0.460000008,1.200000048,180,,-35,0.116548009,16.5,0.986386776,14.89999962,100.8075256,14.6484375,1.580000043,5.099999905,198,,0,0.204001084,17.39999962,0.985924125,15,100.8221817,64.08691406,2.210000038,5.400000095,205,,15,0.213303134,17.39999962,0.974573791,14.89999962,100.7195892,69.58007813,2.230000019,5.699999809,203,,30
2016-06-21 10:00:00,0.135139614,14.89999962,0.994539618,15.5,100.8221817,29.296875,0.379999995,1.100000024,196,,-70,0.083141148,15.19999981,0.983780384,15.39999962,100.8954544,31.12792969,0.449999988,1.200000048,177,,-35,0.116548009,16.39999962,0.971807301,15.5,100.8514862,29.296875,1.470000029,4,200,,0,0.203624755,17.39999962,0.970655918,15.69999981,100.8514862,120.8496094,2,4.199999809,206,,15,0.213303134,17.39999962,0.959951878,15.60000038,100.7635574,130.0048828,2.109999895,4.800000191,200,,30
2016-06-21 11:00:00,0.135574386,14.89999962,0.942274809,16.70000076,100.8807983,43.9453125,0.379999995,1.299999952,209,,-70,0.083141148,15.19999981,0.937686324,16.60000038,100.9394226,47.60742188,0.540000021,1.299999952,197,,-35,0.116097413,16.39999962,0.910156608,16.79999924,100.9101105,47.60742188,1.460000038,4.400000095,198,,0,0.203624755,17.5,0.914179087,17,100.9101105,177.6123047,1.980000019,5.800000191,203,,15,0.212934956,17.5,0.90440017,16.89999962,100.8221817,190.4296875,2.099999905,6.199999809,198,,30
2016-06-21 12:00:00,0.135574386,14.89999962,0.879557073,17.70000076,100.9247665,53.10058594,0.439999998,1.399999976,232,,-70,0.083141148,15.19999981,0.870202959,17.60000038,100.9980469,54.93164063,0.449999988,1.600000024,206,,-35,0.116097413,16.39999962,0.849909067,17.70000076,100.9687347,56.76269531,0.959999979,4.199999809,218,,0,0.204001084,17.70000076,0.848553598,18,100.9687347,208.7402344,1.49000001,4.400000095,201,,15,0.21256645,17.70000076,0.844570875,17.79999924,100.8807983,225.2197266,1.929999948,5.400000095,201,,30
2016-06-21 13:00:00,0.136008814,14.89999962,0.858788192,17.89999962,100.9980469,64.08691406,0.569999993,1.799999952,248,,-70,0.082663216,15.19999981,0.854391456,17.79999924,101.0566711,65.91796875,0.460000008,2.200000048,230,,-35,0.115646444,16.39999962,0.834006965,18,101.0420151,62.25585938,0.860000014,5.5,233,,0,0.204001084,18,0.827954948,18.29999924,101.0420151,245.3613281,1.409999967,6.900000095,194,,15,0.21256645,17.89999962,0.828780711,18.10000038,100.9540787,267.3339844,1.789999962,7.099999905,193,,30
2016-06-21 14:00:00,0.136008814,14.89999962,0.867949128,18,101.0420151,133.6669922,0.519999981,2.299999952,253,,-70,0.082663216,15.19999981,0.858251393,18,101.1152878,130.0048828,0.430000007,1.799999952,236,,-35,0.115646444,16.39999962,0.843236208,18.10000038,101.0859833,78.73535156,0.709999979,4.599999905,249,,0,0.204377085,18.29999924,0.825491905,18.79999924,101.0713272,501.7089844,1.039999962,7.400000095,190,,15,0.212197617,18.10000038,0.817204237,18.60000038,100.9833908,534.6679688,1.299999952,5.800000191,189,,30
2016-06-21 15:00:00,0.136008814,15,0.79782182,18.79999924,101.0859833,53.10058594,0.540000021,1.899999976,275,,-70,0.082184896,15.30000019,0.79818505,18.70000076,101.159256,53.10058594,0.289999992,1.399999976,257,,-35,0.115646444,16.5,0.783687055,18.89999962,101.1299438,51.26953125,0.560000002,2.200000048,272,,0,0.204752758,18.60000038,0.768524408,19.39999962,101.1299438,208.7402344,0.569999993,4.400000095,194,,15,0.212197617,18.5,0.769157767,19.20000076,101.0420151,232.5439453,0.779999971,4.5,134,,30
2016-06-21 16:00:00,0.13644287,15,0.768174767,19.5,101.1299438,62.25585938,0.430000007,1.600000024,264,,-70,0.082184896,15.30000019,0.764082074,19.39999962,101.2178802,62.25585938,0.280000001,1.100000024,223,,-35,0.115195103,16.5,0.754641294,19.60000038,101.1885681,54.93164063,0.50999999,1.899999976,257,,0,0.204752758,18.89999962,0.74011451,20.10000038,101.173912,225.2197266,0.680000007,4,181,,15,0.212197617,18.79999924,0.731870353,20,101.0859833,252.6855469,0.819999993,3.700000048,172,,30
2016-06-21 17:00:00,0.13644287,15.10000038,0.700675786,20.79999924,101.159256,111.6943359,0.439999998,1.5,281,,-70,0.082184896,15.39999962,0.704749525,20.79999924,101.2178802,159.3017578,0.289999992,1.700000048,235,,-35,0.115195103,16.60000038,0.700904369,20.70000076,101.2178802,67.74902344,0.49000001,2.700000048,265,,0,0.204377085,19.10000038,0.679687321,21.20000076,101.2032242,214.2333984,0.709999979,3.599999905,164,,15,0.21182847,19.10000038,0.643679857,21.79999924,101.1299438,534.6679688,0.769999981,5.199999809,157,,30
2016-06-21 18:00:00,0.13644287,15.10000038,0.675329804,21.39999962,101.159256,78.73535156,0.370000005,1.5,284,,-70,0.081706196,15.5,0.695283532,21.29999924,101.2178802,95.21484375,0.230000004,0.899999976,182,,-35,0.115195103,16.70000076,0.684062421,21,101.2178802,31.12792969,0.389999986,1.600000024,265,,0,0.204377085,19.20000076,0.667762995,21.20000076,101.2032242,67.74902344,0.629999995,3.200000048,117,,15,0.211458996,19.39999962,0.598470271,22.79999924,101.1299438,477.9052734,0.709999979,3.400000095,96,,30
2016-06-21 19:00:00,0.13644287,15.19999981,0.70418191,21,101.173912,27.46582031,0.310000002,1.5,279,,-70,0.081706196,15.60000038,0.721044302,20.79999924,101.2471924,31.12792969,0.230000004,0.899999976,127,,-35,0.115195103,16.70000076,0.680183351,20.89999962,101.2325363,23.80371094,0.400000006,3.099999905,259,,0,0.204001084,19.10000038,0.66787529,21.10000038,101.2178802,69.58007813,0.620000005,3.299999952,170,,15,0.211089194,19.60000038,0.624495506,21.70000076,101.1445999,130.0048828,0.660000026,3.700000048,80,,30
2016-06-21 20:00:00,0.13644287,15.19999981,0.786278367,20.20000076,101.2032242,10.98632813,0.219999999,0.5,217,,-70,0.081706196,15.69999981,0.774142802,20.10000038,101.2911606,10.98632813,0.25,0.600000024,155,,-35,0.115195103,16.79999924,0.722342312,20.39999962,101.2618484,10.98632813,0.389999986,1.299999952,242,,0,0.204001084,18.89999962,0.709102094,20.70000076,101.2471924,49.43847656,0.409999996,1.200000048,219,,15,0.210719064,19.70000076,0.712896883,20.79999924,101.159256,60.42480469,0.310000002,1.100000024,198,,30
2016-06-21 21:00:00,0.13644287,15.19999981,0.813552856,19.29999924,101.2178802,1.831054688,0.239999995,0.5,231,,-70,0.081706196,15.69999981,0.823133767,19.20000076,101.3058167,3.662109375,0.230000004,0.400000006,162,,-35,0.114743389,16.79999924,0.804612756,19.29999924,101.2765045,1.831054688,0.409999996,0.800000012,249,,0,0.204001084,18.79999924,0.844843388,19.29999924,101.2911606,18.31054688,0.25999999,0.600000024,233,,15,0.209977835,19.60000038,0.844843388,19.29999924,101.1885681,20.14160156,0.25,0.600000024,204,,30
2016-06-21 22:00:00,0.13644287,15.30000019,0.851150274,18.39999962,101.2765045,0,0.25,0.5,241,,-70,0.081227101,15.69999981,0.851150274,18.39999962,101.3351212,0,0.230000004,0.5,166,,-35,0.114743389,16.89999962,0.836964428,18.39999962,101.3204727,0,0.25,0.5,260,,0,0.204001084,18.70000076,0.842230022,18.29999924,101.3204727,3.662109375,0.25,0.600000024,231,,15,0.209977835,19.5,0.867328703,18.10000038,101.2178802,3.662109375,0.289999992,0.699999988,212,,30
2016-06-21 23:00:00,0.13644287,15.30000019,0.879412055,16.60000038,101.3058167,0,0.409999996,0.699999988,250,,-70,0.081227101,15.80000019,0.874359667,16.5,101.3790894,0,0.270000011,0.5,207,,-35,0.114743389,16.89999962,0.869028211,16.5,101.3497772,0,0.430000007,0.699999988,274,,0,0.203248098,18.5,0.924277067,16.10000038,101.3497772,0,0.349999994,0.899999976,240,,15,0.209606737,19.29999924,0.913684487,16,101.2471924,0,0.370000005,1,215,,30
2016-06-22 00:00:00,0.13644287,15.30000019,0.915144563,15.39999962,101.3351212,0,0.400000006,0.800000012,249,,-70,0.081227101,15.80000019,0.909424901,15.39999962,101.3937454,0,0.370000005,0.699999988,226,,-35,0.114743389,16.89999962,0.897985578,15.39999962,101.3790894,0,0.5,0.800000012,276,,0,0.202871114,18.29999924,0.950947762,14.89999962,101.3937454,0,0.409999996,0.899999976,223,,15,0.209235311,19,0.939261734,14.80000019,101.2765045,0,0.460000008,1.100000024,202,,30
2016-06-22 01:00:00,0.13644287,15.30000019,0.950947762,14.89999962,101.3644333,0,0.460000008,1,253,,-70,0.080747627,15.69999981,0.939134717,14.89999962,101.4230576,0,0.419999987,1.100000024,226,,-35,0.114743389,16.79999924,0.933228254,14.89999962,101.4084015,0,0.620000005,1.299999952,276,,0,0.202493802,18,0.957305312,14.69999981,101.4230576,0,0.560000002,1.200000048,264,,15,0.208491489,18.70000076,0.951565385,14.5,101.3058167,0,0.50999999,1.899999976,228,,30
2016-06-22 02:00:00,0.13644287,15.30000019,0.969937265,14.39999962,101.4084015,0,0.529999971,1.100000024,256,,-70,0.080267757,15.69999981,0.951636553,14.39999962,101.4670258,0,0.310000002,0.899999976,220,,-35,0.114743389,16.79999924,0.951636553,14.39999962,101.4377136,0,0.589999974,1.100000024,277,,0,0.202493802,17.70000076,0.957626283,14.5,101.4377136,0,0.529999971,1.100000024,274,,15,0.208119079,18.39999962,0.957855225,14.19999981,101.3351212,0,0.400000006,1.299999952,237,,30
2016-06-22 03:00:00,0.13644287,15.19999981,0.982973576,13.89999962,101.4230576,0,0.579999983,1,252,,-70,0.080267757,15.60000038,0.970371306,13.89999962,101.4963379,0,0.280000001,0.800000012,199,,-35,0.114743389,16.70000076,0.964094043,14,101.4670258,0,0.560000002,1.100000024,272,,0,0.202493802,17.5,0.983036637,13.80000019,101.4523697,0,0.479999989,1.399999976,245,,15,0.207746357,18.10000038,0.976541221,13.5,101.3497772,0,0.419999987,1.899999976,208,,30
2016-06-22 04:00:00,0.13644287,15.19999981,0.98947978,13.60000038,101.4084015,0,0.460000008,0.899999976,255,,-70,0.0797875,15.5,0.976629376,13.60000038,101.4963379,0,0.200000003,0.5,190,,-35,0.114291303,16.60000038,0.963913202,13.69999981,101.4523697,0,0.5,1.200000048,280,,0,0.202116162,17.29999924,0.976680279,13.69999981,101.4523697,0,0.370000005,1.100000024,273,,15,0.207373306,17.89999962,0.969905794,13.39999962,101.3497772,0,0.200000003,1.100000024,274,,30
2016-06-22 05:00:00,0.13644287,15.10000038,0.995832264,13.19999981,101.4084015,0,0.430000007,0.899999976,250,,-70,0.0797875,15.5,0.982642412,13.19999981,101.4816818,0,0.25,0.600000024,179,,-35,0.114291303,16.5,0.982642412,13.19999981,101.4523697,0,0.49000001,1.100000024,268,,0,0.202116162,17.10000038,0.982642412,13.19999981,101.4523697,1.831054688,0.479999989,1,238,,15,0.206999913,17.60000038,0.988372922,12.80000019,101.3790894,0,0.319999993,1.100000024,206,,30
2016-06-22 06:00:00,0.13644287,15.10000038,0.995943487,13.39999962,101.4230576,0,0.379999995,0.699999988,260,,-70,0.0797875,15.39999962,0.98292464,13.39999962,101.510994,1.831054688,0.189999998,0.600000024,167,,-35,0.113838844,16.5,0.945312977,14,101.4816818,27.46582031,0.379999995,1,284,,0,0.202116162,16.89999962,0.957833707,14,101.4816818,42.11425781,0.300000012,1,270,,15,0.206999913,17.39999962,0.957667947,13.80000019,101.3790894,34.79003906,0.189999998,0.800000012,295,,30
2016-06-22 07:00:00,0.13644287,15,0.989447355,13.69999981,101.4670258,12.81738281,0.280000001,0.699999988,263,,-70,0.0797875,15.30000019,0.976694465,13.80000019,101.5403061,27.46582031,0.189999998,0.5,156,,-35,0.113838844,16.39999962,0.903768539,15.30000019,101.510994,140.9912109,0.460000008,2.299999952,252,,0,0.202493802,16.70000076,0.909130871,15.60000038,101.510994,177.6123047,0.469999999,1.799999952,245,,15,0.206626207,17.20000076,0.920659542,15.5,101.4084015,157.4707031,0.379999995,1.700000048,218,,30
2016-06-22 08:00:00,0.136008814,15,0.95709163,16.10000038,101.4816818,34.79003906,0.219999999,0.800000012,261,,-70,0.0797875,15.19999981,0.921793342,16.60000038,101.5403061,60.42480469,0.209999993,0.800000012,221,,-35,0.113386005,16.29999924,0.776131809,19.70000076,101.52565,151.9775391,1.299999952,3.700000048,200,,0,0.202493802,16.79999924,0.778949738,20,101.52565,347.9003906,1.340000033,3,199,,15,0.206626207,17.10000038,0.791789532,20,101.4377136,314.9414063,1.100000024,2.599999905,190,,30
2016-06-22 09:00:00,0.136008814,14.89999962,0.813935995,19.89999962,101.4816818,76.90429688,0.25,0.800000012,145,,-70,0.079306856,15.19999981,0.776622355,20.39999962,101.5549622,102.5390625,0.49000001,1.200000048,139,,-35,0.113386005,16.29999924,0.694620728,21.5,101.5403061,161.1328125,1.980000019,3.299999952,194,,0,0.202493802,17.29999924,0.696429491,22,101.52565,457.7636719,1.669999957,3,195,,15,0.206626207,17.29999924,0.699720562,22.10000038,101.4377136,428.4667969,1.330000043,3.299999952,184,,30
2016-06-22 10:00:00,0.136008814,14.89999962,0.672665656,23.10000038,101.4963379,184.9365234,0.439999998,1.399999976,138,,-70,0.0797875,15.19999981,0.662500501,23,101.5403061,126.3427734,0.670000017,1.399999976,137,,-35,0.113386005,16.5,0.62261045,23.29999924,101.5403061,252.6855469,2.549999952,4.800000191,190,,0,0.202871114,18,0.620380461,24,101.5403061,646.3623047,2.150000095,4.699999809,196,,15,0.206252173,17.70000076,0.622917593,24.20000076,101.4523697,620.7275391,1.889999986,4.599999905,184,,30
2016-06-22 11:00:00,0.136008814,14.89999962,0.622487485,24.29999924,101.4816818,146.484375,0.550000012,1.600000024,138,,-70,0.0797875,15.19999981,0.595549762,24.5,101.5403061,448.6083984,0.779999971,1.899999976,131,,-35,0.113386005,16.79999924,0.58296448,24.29999924,101.5403061,496.2158203,2.890000105,5.900000095,189,,0,0.203248098,18.89999962,0.58148396,24.89999962,101.52565,763.5498047,2.349999905,5,195,,15,0.206252173,18.5,0.590290844,25.10000038,101.4523697,745.2392578,1.99000001,5.900000095,183,,30
2016-06-22 12:00:00,0.13644287,15,0.572639465,25.70000076,101.4816818,331.4208984,0.560000002,1.799999952,158,,-70,0.0797875,15.30000019,0.570279241,25.5,101.5403061,252.6855469,0.649999976,1.700000048,140,,-35,0.113386005,17.10000038,0.559241414,24.89999962,101.52565,562.1337891,2.779999971,5.900000095,194,,0,0.204001084,20.10000038,0.564424932,25.39999962,101.52565,728.7597656,2.49000001,5.800000191,201,,15,0.206626207,19.39999962,0.569951177,25.60000038,101.4523697,719.6044922,2.430000067,5.199999809,191,,30
2016-06-22 13:00:00,0.13644287,15.19999981,0.573677778,25.39999962,101.4816818,177.6123047,0.569999993,1.600000024,137,,-70,0.0797875,15.5,0.564688444,25.29999924,101.5403061,166.6259766,0.670000017,1.600000024,136,,-35,0.113386005,17.5,0.540122867,25,101.52565,100.7080078,3.049999952,7.099999905,192,,0,0.204001084,21.10000038,0.545370877,25.70000076,101.52565,737.9150391,2.450000048,5,201,,15,0.206252173,20.20000076,0.554711878,25.60000038,101.4377136,745.2392578,2.430000067,5.099999905,188,,30
2016-06-22 14:00:00,0.13644287,15.30000019,0.544693589,26,101.4523697,179.4433594,0.589999974,1.700000048,133,,-70,0.0797875,15.69999981,0.541939199,25.89999962,101.510994,186.7675781,0.660000026,1.600000024,133,,-35,0.113838844,17.79999924,0.508993864,25.60000038,101.510994,67.74902344,2.710000038,6.300000191,191,,0,0.204001084,21.60000038,0.517575264,26.29999924,101.510994,686.6455078,2.160000086,5.900000095,199,,15,0.205877811,20.70000076,0.526157379,26.39999962,101.4084015,712.2802734,2.059999943,5.900000095,188,,30
2016-06-22 15:00:00,0.13644287,15.5,0.543892682,26.29999924,101.4230576,164.7949219,0.529999971,1.700000048,131,,-70,0.0797875,15.89999962,0.544693589,26,101.4963379,166.6259766,0.600000024,1.5,138,,-35,0.113838844,18,0.503015399,25.89999962,101.4963379,80.56640625,2.430000067,5.300000191,192,,0,0.204001084,22,0.511504114,26.5,101.4816818,587.7685547,2.190000057,5,201,,15,0.205128103,21.10000038,0.519793153,26.70000076,101.3937454,628.0517578,1.950000048,5,188,,30
2016-06-22 16:00:00,0.13644287,15.60000038,0.612269759,25.10000038,101.4523697,56.76269531,0.50999999,1.299999952,162,,-70,0.0797875,16.20000076,0.590660691,25,101.510994,54.93164063,0.569999993,1.299999952,151,,-35,0.113386005,18.10000038,0.562418878,24.89999962,101.510994,43.9453125,2.869999886,6.099999905,195,,0,0.204001084,22.10000038,0.580871284,25.10000038,101.510994,223.3886719,2.680000067,5.300000191,207,,15,0.204377085,21.5,0.593430698,25.10000038,101.4084015,250.8544922,2.440000057,5.300000191,195,,30
2016-06-22 17:00:00,0.13644287,15.69999981,0.699157774,23.79999924,101.4670258,31.12792969,0.419999987,1.200000048,187,,-70,0.0797875,16.39999962,0.685581863,23.79999924,101.5403061,31.12792969,0.419999987,1.200000048,161,,-35,0.113386005,18.10000038,0.64385432,24,101.5403061,27.46582031,1.799999952,4.5,198,,0,0.203624755,22,0.663974822,24,101.52565,122.6806641,1.919999957,5.199999809,207,,15,0.203248098,21.60000038,0.674724042,23.89999962,101.4377136,135.4980469,1.809999943,4.5,197,,30
2016-06-22 18:00:00,0.13644287,15.89999962,0.728237867,23.60000038,101.4523697,31.12792969,0.319999993,0.899999976,185,,-70,0.0797875,16.5,0.71190542,23.5,101.52565,38.45214844,0.419999987,0.899999976,154,,-35,0.113386005,18.20000076,0.665218055,23.79999924,101.510994,27.46582031,1.549999952,3.400000095,199,,0,0.202871114,21.79999924,0.678097665,23.89999962,101.510994,113.5253906,1.620000005,5,204,,15,0.202493802,21.60000038,0.695763767,23.79999924,101.4230576,153.8085938,1.529999971,3.200000048,194,,30
2016-06-22 19:00:00,0.13644287,15.89999962,0.705086648,23.89999962,101.4377136,29.296875,0.379999995,1.299999952,187,,-70,0.079306856,16.60000038,0.684844911,23.89999962,101.4963379,31.12792969,0.430000007,1.100000024,155,,-35,0.113386005,18.20000076,0.636171103,24.20000076,101.4963379,25.63476563,1.649999976,4.400000095,199,,0,0.202493802,21.60000038,0.645542622,24.29999924,101.4963379,84.22851563,1.710000038,3.400000095,206,,15,0.201359883,21.39999962,0.651508331,24.39999962,101.4084015,131.8359375,1.720000029,3.799999952,195,,30
2016-06-22 20:00:00,0.136008814,16,0.729311228,23.10000038,101.4670258,10.98632813,0.289999992,0.800000012,210,,-70,0.079306856,16.60000038,0.72744292,22.89999962,101.510994,12.81738281,0.289999992,0.899999976,163,,-35,0.113386005,18.10000038,0.681445003,23.39999962,101.510994,10.98632813,0.49000001,3.299999952,235,,0,0.202493802,21.39999962,0.691170335,23.5,101.510994,43.9453125,0.629999995,3.299999952,220,,15,0.200602293,21.29999924,0.687714458,23.5,101.4230576,62.25585938,0.709999979,2.799999952,211,,30
2016-06-22 21:00:00,0.136008814,16,0.779405236,22.39999962,101.4670258,3.662109375,0.219999999,0.600000024,220,,-70,0.078825824,16.70000076,0.773011208,22.29999924,101.52565,3.662109375,0.239999995,0.5,157,,-35,0.113386005,18.10000038,0.760935903,22.39999962,101.52565,5.493164063,0.310000002,0.699999988,260,,0,0.202493802,21.10000038,0.791593194,22.29999924,101.510994,20.14160156,0.409999996,0.800000012,225,,15,0.199843362,21.20000076,0.775711358,22.39999962,101.4230576,25.63476563,0.310000002,0.800000012,203,,30
2016-06-22 22:00:00,0.136008814,16.10000038,0.83584398,21.10000038,101.4963379,0,0.319999993,0.600000024,253,,-70,0.078344405,16.70000076,0.828922689,21,101.5696106,0,0.209999993,0.400000006,190,,-35,0.113386005,18.10000038,0.811848462,21.10000038,101.5549622,0,0.519999981,0.899999976,274,,0,0.201738179,20.89999962,0.847328901,20.79999924,101.5403061,0,0.330000013,0.699999988,260,,15,0.199463412,21,0.845459044,20.60000038,101.4523697,0,0.219999999,0.5,225,,30
2016-06-22 23:00:00,0.136008814,16.10000038,0.879582882,19.39999962,101.52565,0,0.340000004,0.600000024,246,,-70,0.078344405,16.70000076,0.885074019,19.29999924,101.5989227,0,0.25999999,0.400000006,176,,-35,0.113386005,18.10000038,0.898261189,18.89999962,101.5842667,0,0.319999993,0.800000012,252,,0,0.201359883,20.60000038,0.932638884,18.29999924,101.5842667,0,0.469999999,0.800000012,201,,15,0.199083135,20.70000076,0.91836381,18.29999924,101.4670258,0,0.50999999,0.800000012,191,,30
2016-06-23 00:00:00,0.136008814,16.10000038,0.924145997,18.20000076,101.5403061,0,0.400000006,0.600000024,250,,-70,0.078344405,16.60000038,0.920332074,18.10000038,101.6135788,0,0.270000011,0.5,198,,-35,0.113386005,18,0.926135659,18,101.5842667,0,0.469999999,1.100000024,267,,0,0.200981244,20.20000076,0.962862551,17.29999924,101.5842667,0,0.439999998,0.899999976,220,,15,0.198321566,20.39999962,0.948572695,17.20000076,101.4816818,0,0.439999998,0.899999976,200,,30
2016-06-23 01:00:00,0.136008814,16.10000038,0.960780859,17.5,101.5696106,0,0.50999999,0.800000012,254,,-70,0.078344405,16.60000038,0.945768654,17.5,101.6282349,0,0.349999994,0.600000024,228,,-35,0.112932801,17.89999962,0.945768654,17.5,101.5989227,0,0.560000002,0.800000012,275,,0,0.200981244,19.89999962,0.985365331,16.60000038,101.5989227,0,0.430000007,0.899999976,230,,15,0.19794029,20.10000038,0.963331223,16.70000076,101.4963379,0,0.430000007,1.200000048,199,,30
2016-06-23 02:00:00,0.136008814,16,0.976157308,17,101.5696106,0,0.409999996,0.699999988,248,,-70,0.077862591,16.5,0.960662782,17,101.6282349,0,0.370000005,0.600000024,224,,-35,0.112479217,17.89999962,0.955497921,17,101.5989227,0,0.439999998,0.800000012,268,,0,0.200222999,19.5,0.989906192,16.10000038,101.6135788,0,0.460000008,0.899999976,199,,15,0.19794029,19.79999924,0.972742677,16.20000076,101.510994,0,0.529999971,1.200000048,184,,30
2016-06-23 03:00:00,0.136008814,16,0.98006767,16.60000038,101.5549622,0,0.439999998,0.699999988,258,,-70,0.077862591,16.5,0.970325947,16.5,101.6135788,0,0.400000006,0.699999988,238,,-35,0.112479217,17.79999924,0.971155822,16.39999962,101.5696106,0,0.529999971,0.899999976,275,,0,0.199843362,19.20000076,0.999914289,16.20000076,101.5842667,0,0.5,0.899999976,269,,15,0.197558671,19.5,0.980474472,15.89999962,101.4963379,0,0.239999995,0.800000012,266,,30
2016-06-23 04:00:00,0.135574386,15.89999962,0.989906192,16.10000038,101.5549622,0,0.360000014,0.699999988,259,,-70,0.077380389,16.39999962,0.985238075,16,101.6135788,0,0.319999993,0.600000024,225,,-35,0.112025261,17.70000076,0.985238075,16,101.5989227,0,0.400000006,0.699999988,280,,0,0.199463412,19,0.985238075,16,101.6135788,0,0.340000004,0.800000012,270,,15,0.19717674,19.20000076,0.982538939,15.60000038,101.4963379,0,0.209999993,0.699999988,327,,30
2016-06-23 05:00:00,0.135574386,15.89999962,0.997913837,15.80000019,101.5696106,0,0.409999996,0.800000012,256,,-70,0.0768978,16.29999924,0.993098795,15.69999981,101.6428909,0,0.280000001,0.5,210,,-35,0.112025261,17.60000038,0.987488091,15.69999981,101.6135788,1.831054688,0.379999995,0.800000012,271,,0,0.199463412,18.70000076,0.996497154,15.19999981,101.6135788,1.831054688,0.340000004,0.800000012,197,,15,0.196794465,19,0.991262615,15.10000038,101.510994,1.831054688,0.230000004,0.600000024,184,,30
2016-06-23 06:00:00,0.135574386,15.80000019,1.004320264,15.69999981,101.5696106,0,0.219999999,0.600000024,249,,-70,0.0768978,16.20000076,0.999479294,15.60000038,101.657547,5.493164063,0.200000003,0.400000006,165,,-35,0.112025261,17.5,0.929673612,17,101.6135788,65.91796875,0.25,0.600000024,272,,0,0.199463412,18.5,0.957233727,16.79999924,101.6282349,87.890625,0.219999999,0.600000024,157,,15,0.196794465,18.70000076,0.959663033,16.5,101.52565,67.74902344,0.189999998,0.5,111,,30
2016-06-23 07:00:00,0.135574386,15.80000019,0.999914289,16.20000076,101.5696106,9.155273438,0.170000002,0.5,246,,-70,0.0768978,16.10000038,0.969472349,16.60000038,101.6428909,32.95898438,0.209999993,0.400000006,216,,-35,0.112025261,17.39999962,0.852055967,19.5,101.6282349,195.9228516,0.449999988,1.200000048,48,,0,0.199843362,18.29999924,0.852694869,19.89999962,101.6282349,219.7265625,0.300000012,1,19,,15,0.196794465,18.5,0.86432749,19.60000038,101.5403061,184.9365234,0.370000005,1,34,,30
2016-06-23 08:00:00,0.135139614,15.69999981,0.983325005,17.70000076,101.5696106,21.97265625,0.200000003,0.600000024,242,,-70,0.0768978,16.10000038,0.938617468,18.60000038,101.6282349,45.77636719,0.300000012,0.699999988,156,,-35,0.111570932,17.29999924,0.822253764,21.60000038,101.6282349,168.4570313,0.660000026,1.5,93,,0,0.199843362,18.39999962,0.783469021,22.70000076,101.6135788,357.0556641,0.389999986,1.600000024,74,,15,0.196794465,18.39999962,0.793039858,22.5,101.52565,311.2792969,0.430000007,1.299999952,66,,30
2016-06-23 09:00:00,0.135139614,15.69999981,0.81389159,22.29999924,101.5403061,75.07324219,0.340000004,0.899999976,99,,-70,0.0768978,16,0.778876066,23.10000038,101.6135788,91.55273438,0.600000024,1.399999976,116,,-35,0.111570932,17.29999924,0.720450521,23.70000076,101.5989227,223.3886719,1.25,2.900000095,114,,0,0.199843362,18.89999962,0.693647027,24.79999924,101.5989227,503.5400391,0.829999983,2.299999952,109,,15,0.196411848,18.5,0.714707911,24.29999924,101.510994,461.4257813,1.070000052,2.400000095,93,,30
2016-06-23 10:00:00,0.135139614,15.69999981,0.663974345,25.29999924,101.5696106,194.0917969,0.50999999,1.700000048,127,,-70,0.0768978,16,0.662507296,25.10000038,101.6282349,115.3564453,0.730000019,1.700000048,127,,-35,0.111570932,17.5,0.618717074,25.60000038,101.6282349,239.8681641,1.700000048,4.199999809,173,,0,0.200222999,19.60000038,0.60686934,26.5,101.6282349,637.2070313,1.299999952,4.099999905,181,,15,0.196411848,18.89999962,0.618428707,26.5,101.5403061,602.4169922,1.169999957,3.900000095,159,,30
2016-06-23 11:00:00,0.135139614,15.69999981,0.601738036,26.39999962,101.52565,137.3291016,0.699999988,1.600000024,120,,-70,0.0768978,16,0.577970803,26.5,101.6135788,446.7773438,0.879999995,1.700000048,124,,-35,0.111570932,17.79999924,0.555226862,26.39999962,101.6135788,477.9052734,2.660000086,5.800000191,181,,0,0.200981244,20.5,0.557928681,27.10000038,101.5989227,750.7324219,1.99000001,5.400000095,189,,15,0.196411848,19.79999924,0.569087267,27.10000038,101.4963379,726.9287109,1.799999952,5,176,,30
2016-06-23 12:00:00,0.134704471,15.69999981,0.546240151,27.79999924,101.510994,336.9140625,0.649999976,2.099999905,129,,-70,0.0768978,16.10000038,0.547242343,27.60000038,101.5696106,269.1650391,0.75,1.799999952,127,,-35,0.111570932,18.20000076,0.529705167,27.20000076,101.5842667,554.8095703,2.519999981,6.300000191,186,,0,0.200981244,21.60000038,0.535075247,27.89999962,101.5549622,827.6367188,1.850000024,5.599999905,193,,15,0.196411848,20.70000076,0.545196831,28,101.4816818,814.8193359,1.600000024,4.5,175,,30
2016-06-23 13:00:00,0.134704471,15.89999962,0.551961422,28.20000076,101.4523697,206.9091797,0.790000021,2.200000048,110,,-70,0.0768978,16.20000076,0.547843397,28,101.510994,206.9091797,1,2,118,,-35,0.112025261,18.5,0.535973132,27.70000076,101.52565,113.5253906,2.299999952,5,169,,0,0.201359883,22.60000038,0.534704685,28.5,101.510994,864.2578125,1.620000005,4.199999809,173,,15,0.196028918,21.5,0.545577466,28.39999962,101.4230576,862.4267578,1.669999957,5.300000191,153,,30
2016-06-23 14:00:00,0.134704471,16.10000038,0.522443473,28.89999962,101.3937454,175.78125,0.75,2,116,,-70,0.0768978,16.5,0.516274333,28.60000038,101.4523697,210.5712891,1,2.299999952,125,,-35,0.112025261,18.89999962,0.501621008,28.39999962,101.4523697,51.26953125,2.25,5.199999809,176,,0,0.201359883,23.20000076,0.502680242,29.39999962,101.4377136,864.2578125,1.570000052,5,179,,15,0.195645645,22.20000076,0.512952864,29.29999924,101.3644333,869.7509766,1.519999981,4.300000191,160,,30
2016-06-23 15:00:00,0.134704471,16.20000076,0.496917456,29.60000038,101.3351212,289.3066406,0.689999998,1.700000048,111,,-70,0.0768978,16.70000076,0.496175885,29.20000076,101.3937454,234.375,1.019999981,2,123,,-35,0.112025261,19.10000038,0.474223673,29.10000038,101.4084015,95.21484375,2.230000019,5.699999809,174,,0,0.201359883,23.60000038,0.470749676,30.20000076,101.3937454,809.3261719,1.570000052,5.099999905,175,,15,0.19449383,22.89999962,0.480489939,30.10000038,101.3058167,825.8056641,1.549999952,5.400000095,151,,30
2016-06-23 16:00:00,0.134704471,16.39999962,0.487971455,30,101.2765045,93.38378906,0.540000021,1.700000048,123,,-70,0.0768978,17,0.479673833,29.70000076,101.3351212,95.21484375,0.810000002,1.799999952,127,,-35,0.112025261,19.10000038,0.458321929,29.60000038,101.3644333,40.28320313,2.359999895,6.599999905,183,,0,0.200981244,23.70000076,0.460776776,30.39999962,101.3351212,505.3710938,1.789999962,5.099999905,188,,15,0.194109231,23.60000038,0.466118932,30.79999924,101.2618484,739.7460938,1.659999967,5.300000191,169,,30
2016-06-23 17:00:00,0.134704471,16.5,0.499758214,30,101.2178802,120.8496094,0.469999999,1.5,128,,-70,0.077380389,17.20000076,0.47345838,30.10000038,101.2765045,219.7265625,0.730000019,2,132,,-35,0.111570932,19.10000038,0.445539147,30,101.2911606,31.12792969,2.220000029,5.5,188,,0,0.200981244,23.29999924,0.466088772,30.20000076,101.2765045,71.41113281,1.779999971,5.5,197,,15,0.19333902,24.20000076,0.457809478,31.20000076,101.2032242,624.3896484,1.570000052,3.700000048,181,,30
2016-06-23 18:00:00,0.134704471,16.70000076,0.506566346,29.60000038,101.173912,69.58007813,0.419999987,1,115,,-70,0.077380389,17.39999962,0.479306072,29.79999924,101.2325363,86.05957031,0.670000017,1.600000024,124,,-35,0.111570932,19.10000038,0.447676003,30.10000038,101.2325363,23.80371094,1.75999999,4.199999809,183,,0,0.200222999,23,0.474186897,29.89999962,101.2325363,34.79003906,1.269999981,3.400000095,186,,15,0.1921812,24.60000038,0.450064898,31.5,101.159256,490.7226563,1.129999995,3.099999905,166,,30
2016-06-23 19:00:00,0.134704471,16.70000076,0.521925211,29,101.1152878,23.80371094,0.469999999,1.200000048,114,,-70,0.0768978,17.5,0.503135562,29.29999924,101.173912,32.95898438,0.800000012,1.700000048,122,,-35,0.111570932,19.10000038,0.46976763,29.79999924,101.1885681,18.31054688,1.419999957,3,162,,0,0.199843362,22.70000076,0.496917456,29.60000038,101.1885681,25.63476563,0.970000029,3.5,165,,15,0.191020355,24.70000076,0.495525301,29.89999962,101.0859833,87.890625,1.029999971,3.900000095,145,,30
2016-06-23 20:00:00,0.134268954,16.79999924,0.557816207,28.10000038,101.0859833,9.155273438,0.439999998,1,115,,-70,0.0768978,17.60000038,0.543557465,28.29999924,101.1299438,9.155273438,0.75,1.299999952,123,,-35,0.111570932,19.10000038,0.50444448,29,101.1445999,7.32421875,1.039999962,2.799999952,165,,0,0.199463412,22.39999962,0.536720872,28.60000038,101.1299438,18.31054688,0.680000007,2.700000048,174,,15,0.189856514,24.5,0.54498744,28.5,101.0420151,21.97265625,0.600000024,2.099999905,146,,30
2016-06-23 21:00:00,0.134268954,16.89999962,0.623413682,26.60000038,101.027359,1.831054688,0.550000012,1,112,,-70,0.0768978,17.70000076,0.608329356,26.70000076,101.1006317,1.831054688,0.779999971,1.799999952,117,,-35,0.111570932,19.10000038,0.56680274,27.5,101.1006317,1.831054688,0.939999998,2,140,,0,0.198702514,22.10000038,0.604037523,26.89999962,101.0859833,9.155273438,0.50999999,1.899999976,144,,15,0.189078927,24.20000076,0.610438824,26.79999924,100.9980469,10.98632813,0.620000005,2.200000048,127,,30
2016-06-23 22:00:00,0.134268954,16.89999962,0.626110733,25.39999962,101.0420151,0,0.720000029,1.100000024,108,,-70,0.0768978,17.70000076,0.630482793,25.20000076,101.1006317,0,0.790000021,1.200000048,120,,-35,0.111570932,19.10000038,0.586851299,25.89999962,101.1006317,0,1.220000029,2.700000048,179,,0,0.198321566,21.89999962,0.626742125,25.29999924,101.0859833,0,0.829999983,1.899999976,195,,15,0.188299999,23.89999962,0.645034134,24.89999962,100.9980469,0,0.5,2.099999905,184,,30
2016-06-23 23:00:00,0.134268954,17,0.625781119,24.29999924,101.027359,0,0.610000014,1.100000024,109,,-70,0.076414824,17.70000076,0.619193912,24.29999924,101.1006317,0,0.810000002,1.100000024,122,,-35,0.111570932,19.10000038,0.588161528,24.79999924,101.1006317,0,1.730000019,3.099999905,188,,0,0.198321566,21.60000038,0.615495324,24.39999962,101.1006317,0,1.269999981,2.299999952,201,,15,0.187519729,23.5,0.65216136,23.70000076,100.9980469,0,0.790000021,1.799999952,196,,30
2016-06-24 00:00:00,0.134268954,17,0.631674588,23.70000076,101.027359,0,0.49000001,1.200000048,107,,-70,0.076414824,17.70000076,0.621096432,23.79999924,101.0859833,0,0.790000021,1.299999952,123,,-35,0.111570932,19,0.593097031,24.20000076,101.0859833,0,2.200000048,4,189,,0,0.198321566,21.29999924,0.620746136,23.89999962,101.0713272,0,1.629999995,3.599999905,201,,15,0.18712908,23.10000038,0.650592923,23.29999924,100.9833908,0,1.039999962,2.900000095,189,,30
2016-06-24 01:00:00,0.134268954,16.89999962,0.662044644,23.10000038,101.027359,0,0.310000002,0.899999976,101,,-70,0.076414824,17.60000038,0.640099525,23.29999924,101.0859833,0,0.680000007,1.200000048,123,,-35,0.111570932,18.89999962,0.614602327,23.70000076,101.0713272,0,1.879999995,4.199999809,190,,0,0.19794029,21.10000038,0.643597305,23.29999924,101.0713272,0,1.399999976,3.799999952,202,,15,0.186346784,22.70000076,0.666969836,22.79999924,100.9833908,0,0.860000014,2.900000095,195,,30
2016-06-24 02:00:00,0.133833081,16.89999962,0.746003866,21.39999962,101.0127029,0,0.109999999,0.400000006,332,,-70,0.075931452,17.5,0.708307624,21.89999962,101.0713272,0,0.300000012,0.800000012,118,,-35,0.11111623,18.89999962,0.652548909,22.79999924,101.0566711,0,1.080000043,2.700000048,195,,0,0.19717674,20.79999924,0.675552487,22.5,101.0566711,0,1.039999962,2.400000095,214,,15,0.185955137,22.29999924,0.717013359,21.70000076,100.9687347,0,0.560000002,1.600000024,207,,30
2016-06-24 03:00:00,0.133833081,16.89999962,0.794732988,20.20000076,100.9980469,0,0.100000001,0.400000006,196,,-70,0.075447693,17.5,0.782649815,20.10000038,101.0566711,0,0.209999993,0.5,129,,-35,0.11111623,18.79999924,0.784331262,19.79999924,101.0566711,0,0.230000004,0.699999988,296,,0,0.196794465,20.60000038,0.822493017,19.29999924,101.0420151,0,0.230000004,0.800000012,39,,15,0.185563132,22,0.818635762,19.20000076,100.9394226,0,0.310000002,1.100000024,59,,30
2016-06-24 04:00:00,0.133833081,16.89999962,0.829227924,19.60000038,100.9833908,0,0.109999999,0.400000006,276,,-70,0.074963547,17.39999962,0.822493017,19.29999924,101.0713272,0,0.170000002,0.400000006,131,,-35,0.11111623,18.70000076,0.845222712,18.60000038,101.0420151,0,0.25999999,0.899999976,357,,0,0.196794465,20.29999924,0.876965642,18.10000038,101.0420151,0,0.25999999,0.699999988,27,,15,0.185563132,21.60000038,0.872147143,18.10000038,100.9394226,0,0.310000002,0.899999976,34,,30
2016-06-24 05:00:00,0.133833081,16.79999924,0.888979137,18.39999962,100.9540787,0,0.180000007,0.600000024,252,,-70,0.074963547,17.29999924,0.881051123,18.20000076,101.0420151,0,0.219999999,0.5,151,,-35,0.110661156,18.60000038,0.88806504,17.89999962,101.0127029,1.831054688,0.389999986,0.899999976,327,,0,0.196411848,20.10000038,0.914956212,17.60000038,101.027359,1.831054688,0.289999992,1,323,,15,0.185170799,21.29999924,0.917253256,17.29999924,100.9247665,1.831054688,0.25999999,0.800000012,10,,30
2016-06-24 06:00:00,0.133396849,16.70000076,0.910695136,18.10000038,100.9394226,0,0.200000003,0.5,276,,-70,0.074963547,17.29999924,0.901058137,18.10000038,101.027359,5.493164063,0.150000006,0.400000006,158,,-35,0.110661156,18.5,0.840373337,19.29999924,100.9980469,65.91796875,0.340000004,0.800000012,292,,0,0.196411848,19.89999962,0.879929304,18.89999962,100.9980469,76.90429688,0.239999995,0.800000012,355,,15,0.184778139,21,0.882580578,18.60000038,100.9101105,53.10058594,0.25,0.800000012,16,,30
2016-06-24 07:00:00,0.132960245,16.70000076,0.905224502,19.10000038,100.8954544,9.155273438,0.209999993,1.100000024,284,,-70,0.074963547,17.20000076,0.876418531,19.70000076,100.9687347,32.95898438,0.200000003,0.600000024,133,,-35,0.110205702,18.39999962,0.717443228,22.79999924,100.9540787,195.9228516,1.039999962,3.299999952,194,,0,0.195645645,19.70000076,0.731026351,22.89999962,100.9540787,210.5712891,0.930000007,2.900000095,202,,15,0.184385121,20.70000076,0.755394816,22.60000038,100.8661423,166.6259766,0.699999988,2.799999952,178,,30
2016-06-24 08:00:00,0.132960245,16.60000038,0.858326614,20.89999962,100.9394226,21.97265625,0.360000014,1,249,,-70,0.074963547,17.10000038,0.825649202,21.29999924,100.9980469,45.77636719,0.270000011,0.800000012,180,,-35,0.110205702,18.29999924,0.681772053,24.29999924,100.9980469,170.2880859,0.959999979,2.900000095,216,,0,0.195645645,19.79999924,0.685811579,24.60000038,100.9833908,353.3935547,0.930000007,2.5,204,,15,0.184385121,20.60000038,0.689926445,24.5,100.8954544,305.7861328,0.910000026,2.700000048,193,,30
2016-06-24 09:00:00,0.132960245,16.60000038,0.750067294,23.79999924,100.9394226,71.41113281,0.349999994,1.200000048,177,,-70,0.074963547,17,0.711414278,24.29999924,100.9980469,89.72167969,0.50999999,1.100000024,142,,-35,0.110205702,18.29999924,0.616128802,26,100.9833908,214.2333984,1.799999952,3.400000095,193,,0,0.195645645,20.29999924,0.621318579,26.5,100.9833908,503.5400391,1.440000057,3.099999905,198,,15,0.183991775,20.60000038,0.633714437,26.39999962,100.8954544,459.5947266,1.340000033,3.5,185,,30
2016-06-24 10:00:00,0.132523268,16.60000038,0.636977792,27,100.9247665,166.6259766,0.460000008,1.200000048,140,,-70,0.074963547,17,0.634033442,26.70000076,100.9833908,100.7080078,0.629999995,1.399999976,138,,-35,0.110205702,18.5,0.594194055,27.10000038,100.9833908,245.3613281,2.25999999,4.400000095,189,,0,0.196028918,21,0.595226467,27.70000076,100.9540787,640.8691406,1.75999999,3.299999952,197,,15,0.183991775,20.89999962,0.605148375,27.79999924,100.8807983,606.0791016,1.580000043,3.400000095,186,,30
2016-06-24 11:00:00,0.132523268,16.60000038,0.590260684,28.89999962,100.8661423,139.1601563,0.439999998,1.200000048,153,,-70,0.074963547,17,0.565294921,29.20000076,100.9247665,446.7773438,0.639999986,1.5,141,,-35,0.110205702,18.79999924,0.553268552,28.79999924,100.9394226,545.6542969,2.24000001,4.800000191,192,,0,0.196411848,21.89999962,0.558017373,29.5,100.9247665,754.3945313,1.809999943,4,199,,15,0.183991775,21.70000076,0.569284081,29.60000038,100.8514862,730.5908203,1.549999952,3.900000095,190,,30
2016-06-24 12:00:00,0.132523268,16.60000038,0.538176,30.79999924,100.8807983,333.2519531,0.419999987,1.399999976,132,,-70,0.074963547,17,0.530695915,30.60000038,100.9101105,278.3203125,0.660000026,1.399999976,130,,-35,0.110661156,19.20000076,0.51671797,30.29999924,100.9247665,582.2753906,1.99000001,3.799999952,189,,0,0.196794465,23,0.520938098,31,100.9247665,831.2988281,1.590000033,3.400000095,195,,15,0.183991775,22.70000076,0.534295499,31,100.8368378,820.3125,1.340000033,3.200000048,181,,30
2016-06-24 13:00:00,0.132523268,16.79999924,0.478631169,31.79999924,100.8514862,214.2333984,0.460000008,1.299999952,135,,-70,0.074963547,17.20000076,0.474934876,31.70000076,100.8954544,201.4160156,0.620000005,1.600000024,131,,-35,0.110661156,19.60000038,0.46221149,31.20000076,100.9101105,78.73535156,1.799999952,4.900000095,189,,0,0.196794465,24,0.460112512,32.09999847,100.8954544,867.9199219,1.519999981,4.400000095,193,,15,0.183991775,23.60000038,0.479549497,32,100.8075256,866.0888672,1.279999971,4.800000191,187,,30
2016-06-24 14:00:00,0.132085949,16.89999962,0.435521901,32.5,100.8221817,192.2607422,0.430000007,1.200000048,133,,-70,0.074963547,17.39999962,0.442961037,32.20000076,100.8661423,212.4023438,0.610000014,1.5,125,,-35,0.11111623,19.89999962,0.429704428,31.79999924,100.8807983,53.10058594,1.610000014,3.900000095,183,,0,0.196794465,24.70000076,0.429398715,33,100.8807983,856.9335938,1.320000052,3,184,,15,0.183598086,24.39999962,0.444307119,32.79999924,100.8075256,862.4267578,1.100000024,3.400000095,166,,30
2016-06-24 15:00:00,0.132085949,17.10000038,0.423822463,32.90000153,100.7782135,311.2792969,0.50999999,1.5,119,,-70,0.074963547,17.70000076,0.423253685,32.5,100.8368378,208.7402344,0.670000017,1.399999976,123,,-35,0.11111623,20.10000038,0.407607347,32.20000076,100.8514862,115.3564453,1.769999981,4.599999905,184,,0,0.196411848,25.10000038,0.402060539,33.5,100.8368378,807.4951172,1.450000048,3.799999952,183,,15,0.182414994,25.20000076,0.415981591,33.40000153,100.7635574,823.9746094,1.24000001,3.599999905,167,,30
2016-06-24 16:00:00,0.131648242,17.29999924,0.458548546,32.40000153,100.7342453,89.72167969,0.460000008,1.100000024,108,,-70,0.074963547,18,0.447563976,32.09999847,100.7782135,102.5390625,0.629999995,1.399999976,115,,-35,0.110661156,20.10000038,0.416192681,32.09999847,100.7928696,42.11425781,1.330000043,3.400000095,149,,0,0.196028918,25.20000076,0.420672268,33.20000076,100.7782135,455.9326172,1.019999981,3.099999905,150,,15,0.182019949,25.79999924,0.431055278,33.5,100.7195892,741.5771484,1.049999952,2.799999952,121,,30
2016-06-24 17:00:00,0.131210178,17.39999962,0.476503909,31.79999924,100.6902771,120.8496094,0.419999987,1.299999952,107,,-70,0.074963547,18.20000076,0.44842878,31.89999962,100.7342453,199.5849609,0.629999995,1.100000024,114,,-35,0.11111623,20.20000076,0.414101243,32.09999847,100.7489014,29.296875,1.25999999,3.099999905,131,,0,0.195262045,25,0.442961037,32.20000076,100.7342453,51.26953125,0.769999981,2.900000095,132,,15,0.180832773,26.39999962,0.425700784,33.40000153,100.660965,622.5585938,0.99000001,2.5,102,,30
2016-06-24 18:00:00,0.131210178,17.5,0.529168844,30.79999924,100.6463089,76.90429688,0.409999996,1,96,,-70,0.075447693,18.29999924,0.52767086,30.70000076,100.6902771,87.890625,0.600000024,1.299999952,106,,-35,0.11111623,20.20000076,0.484221548,31.20000076,100.6902771,27.46582031,1.409999967,3.099999905,74,,0,0.194878101,24.60000038,0.524618149,31.10000038,100.6902771,36.62109375,0.839999974,2.799999952,51,,15,0.180039614,26.79999924,0.511588812,32.20000076,100.6023483,492.5537109,1.159999967,3,56,,30
2016-06-24 19:00:00,0.131210178,17.70000076,0.60199064,29.70000076,100.6169968,23.80371094,0.280000001,0.699999988,109,,-70,0.075447693,18.39999962,0.583249867,29.89999962,100.675621,34.79003906,0.529999971,0.800000012,110,,-35,0.110661156,20.20000076,0.536729634,30.70000076,100.675621,20.14160156,0.879999995,2,70,,0,0.194109231,24.29999924,0.585963368,30.10000038,100.675621,29.296875,0.50999999,1.299999952,31,,15,0.179245099,27,0.591008842,30.5,100.5730362,97.04589844,0.779999971,1.799999952,43,,30
2016-06-24 20:00:00,0.130771756,17.70000076,0.646743119,28.79999924,100.6316528,9.155273438,0.180000007,0.400000006,123,,-70,0.074963547,18.5,0.601688325,29.5,100.675621,9.155273438,0.449999988,0.899999976,112,,-35,0.110205702,20.10000038,0.552932143,30.39999962,100.675621,7.32421875,0.469999999,1.600000024,75,,0,0.19372429,24,0.592733622,29.89999962,100.675621,21.97265625,0.330000013,1.299999952,20,,15,0.178449214,26.70000076,0.617528498,29.60000038,100.6023483,27.46582031,0.460000008,1.399999976,33,,30
2016-06-24 21:00:00,0.130771756,17.79999924,0.660583675,27.39999962,100.6023483,0,0.180000007,0.400000006,239,,-70,0.074963547,18.60000038,0.630239785,27.70000076,100.675621,0,0.189999998,0.5,208,,-35,0.110661156,20.10000038,0.614008069,28,100.675621,0,0.449999988,0.699999988,276,,0,0.19372429,23.70000076,0.666065693,27.39999962,100.660965,3.662109375,0.449999988,0.800000012,262,,15,0.177651957,26.29999924,0.673918068,27.20000076,100.5730362,3.662109375,0.330000013,0.600000024,263,,30
2016-06-24 22:00:00,0.130771756,17.79999924,0.783409476,25.39999962,100.5876923,0,0.230000004,0.600000024,245,,-70,0.074963547,18.60000038,0.751174271,25.5,100.660965,0,0.230000004,0.5,174,,-35,0.110205702,20.10000038,0.747746825,25.29999924,100.6463089,0,0.389999986,0.899999976,273,,0,0.192953408,23.39999962,0.803829432,24.5,100.6316528,0,0.370000005,1.399999976,243,,15,0.176853344,25.89999962,0.790811956,24.5,100.5437241,0,0.300000012,1.399999976,289,,30
2016-06-24 23:00:00,0.130771756,17.79999924,0.807244778,23.60000038,100.6316528,0,0.419999987,1.700000048,256,,-70,0.074963547,18.5,0.796939552,23.60000038,100.7195892,0,0.300000012,1.200000048,166,,-35,0.110205702,20.10000038,0.786634326,23.60000038,100.7049332,0,0.680000007,2.099999905,279,,0,0.192567468,23.10000038,0.805213451,23.5,100.6902771,0,0.589999974,2,279,,15,0.176453516,25.39999962,0.816409469,23.20000076,100.5876923,0,0.550000012,1.799999952,4,,30
2016-06-25 00:00:00,0.130332962,17.79999924,0.807198822,23.10000038,100.660965,0,0.370000005,1.200000048,254,,-70,0.074963547,18.5,0.799112201,22.89999962,100.7489014,0,0.310000002,0.800000012,169,,-35,0.110205702,20,0.778876066,23.10000038,100.7342453,0,0.50999999,1.5,272,,0,0.192567468,22.70000076,0.803969085,22.79999924,100.7195892,0,0.589999974,1.600000024,276,,15,0.176053345,24.89999962,0.810133576,22.60000038,100.6169968,0,0.579999983,1.600000024,338,,30
2016-06-25 01:00:00,0.130332962,17.79999924,0.82386452,22.10000038,100.660965,0,0.230000004,1,144,,-70,0.074479006,18.39999962,0.813762665,22,100.7195892,0,0.25999999,0.800000012,121,,-35,0.110205702,19.89999962,0.802407861,22,100.7049332,0,0.409999996,1.799999952,31,,0,0.192567468,22.5,0.822550774,21.89999962,100.7049332,0,0.620000005,2.299999952,28,,15,0.175652832,24.5,0.824950874,21.70000076,100.6169968,0,0.730000019,2.099999905,37,,30
2016-06-25 02:00:00,0.12989381,17.70000076,0.866501987,21.20000076,100.6169968,0,0.159999996,0.699999988,146,,-70,0.073994078,18.29999924,0.859839499,21.10000038,100.6902771,0,0.349999994,0.800000012,127,,-35,0.110205702,19.79999924,0.855840206,21.10000038,100.660965,0,0.300000012,0.800000012,70,,0,0.192567468,22.20000076,0.879918456,20.79999924,100.675621,0,0.330000013,0.899999976,38,,15,0.175251976,24.10000038,0.877155185,20.70000076,100.5730362,0,0.449999988,1.5,59,,30
2016-06-25 03:00:00,0.12989381,17.70000076,0.899068773,20.29999924,100.5583801,0,0.129999995,0.5,123,,-70,0.073508754,18.20000076,0.893241644,20.10000038,100.6463089,0,0.270000011,0.600000024,122,,-35,0.110205702,19.70000076,0.900066793,19.89999962,100.6169968,0,0.280000001,0.899999976,50,,0,0.192567468,21.89999962,0.916976929,19.60000038,100.6169968,0,0.389999986,1,29,,15,0.174850777,23.70000076,0.915121555,19.39999962,100.529068,0,0.589999974,1.200000048,45,,30
2016-06-25 04:00:00,0.129454285,17.60000038,0.920834601,19.29999924,100.5144119,0,0.119999997,0.600000024,118,,-70,0.073508754,18.10000038,0.919997752,19,100.5730362,0,0.300000012,0.600000024,121,,-35,0.109749876,19.60000038,0.937403381,18.70000076,100.5583801,0,0.360000014,0.800000012,66,,0,0.1921812,21.60000038,0.955179751,18.39999962,100.5583801,0,0.330000013,0.699999988,41,,15,0.174850777,23.29999924,0.9421556,18.29999924,100.4704437,0,0.439999998,1,55,,30
2016-06-25 05:00:00,0.129454285,17.60000038,0.952626705,18.60000038,100.4557877,0,0.239999995,0.5,83,,-70,0.073508754,18.10000038,0.955179751,18.39999962,100.5144119,0,0.449999988,0.800000012,103,,-35,0.109749876,19.39999962,0.953911602,18.5,100.4997559,0,1.090000033,2.099999905,64,,0,0.1921812,21.29999924,0.979473293,18,100.4997559,1.831054688,0.709999979,1.899999976,37,,15,0.174850777,22.89999962,0.96241796,17.79999924,100.3971634,0,0.819999993,1.5,43,,30
2016-06-25 06:00:00,0.129454285,17.5,0.95923084,18.79999924,100.4118195,1.831054688,0.119999997,0.400000006,19,,-70,0.073023044,17.89999962,0.952626705,18.60000038,100.4850998,5.493164063,0.25,0.600000024,121,,-35,0.109293669,19.29999924,0.916364491,19.29999924,100.4557877,53.10058594,0.430000007,1.200000048,67,,0,0.1921812,21.10000038,0.931085706,19.20000076,100.4557877,67.74902344,0.5,1.399999976,39,,15,0.174449235,22.60000038,0.925758958,18.89999962,100.3678589,53.10058594,0.660000026,2,50,,30
2016-06-25 07:00:00,0.129014403,17.39999962,0.93891418,19.60000038,100.3825073,9.155273438,0.150000006,0.600000024,42,,-70,0.072536938,17.79999924,0.921599507,19.89999962,100.4557877,31.12792969,0.340000004,0.800000012,118,,-35,0.109293669,19.10000038,0.870472729,20.89999962,100.4264755,173.9501953,1.279999971,2.900000095,61,,0,0.1921812,20.89999962,0.875836492,21.10000038,100.4264755,194.0917969,0.970000029,2.400000095,30,,15,0.174449235,22.29999924,0.889451742,20.70000076,100.3385468,157.4707031,0.980000019,2.099999905,38,,30
2016-06-25 08:00:00,0.129014403,17.39999962,0.896757722,21.29999924,100.3385468,23.80371094,0.239999995,0.899999976,27,,-70,0.072536938,17.70000076,0.869734049,21.79999924,100.4264755,43.9453125,0.340000004,1.100000024,111,,-35,0.109293669,19.10000038,0.81248641,22.70000076,100.3971634,172.1191406,1.649999976,2.900000095,61,,0,0.1921812,20.89999962,0.814279497,23.10000038,100.3971634,335.0830078,1.399999976,2.599999905,31,,15,0.174449235,22.10000038,0.827779889,22.89999962,100.2945786,289.3066406,1.389999986,2.599999905,35,,30
2016-06-25 09:00:00,0.128574133,17.29999924,0.817038655,23.39999962,100.3092346,64.08691406,0.460000008,1.299999952,88,,-70,0.072050445,17.70000076,0.79954797,23.89999962,100.3825073,84.22851563,0.589999974,1.200000048,111,,-35,0.109293669,19.10000038,0.779306293,23.89999962,100.3678589,201.4160156,1.940000057,3.799999952,72,,0,0.1921812,21.29999924,0.763450623,24.60000038,100.3532028,466.9189453,1.409999967,2.900000095,49,,15,0.174449235,22.10000038,0.781960368,24.20000076,100.2799225,428.4667969,1.669999957,3.200000048,48,,30
2016-06-25 10:00:00,0.128574133,17.29999924,0.757459581,25.70000076,100.2506104,150.1464844,0.620000005,1.700000048,89,,-70,0.072050445,17.60000038,0.753046334,26,100.3385468,108.0322266,0.600000024,1.600000024,112,,-35,0.109293669,19.20000076,0.74093461,25.79999924,100.3238907,245.3613281,1.799999952,3.299999952,74,,0,0.1921812,21.79999924,0.722569644,26.70000076,100.3092346,595.0927734,1.220000029,3.700000048,55,,15,0.174449235,22.29999924,0.739811003,26.29999924,100.2359543,567.6269531,1.529999971,3.099999905,54,,30
2016-06-25 11:00:00,0.12813352,17.29999924,0.723626912,27.39999962,100.2212982,124.5117188,0.589999974,1.700000048,88,,-70,0.072050445,17.60000038,0.699901462,28.10000038,100.2799225,360.7177734,0.670000017,1.899999976,112,,-35,0.109293669,19.39999962,0.704439819,27.39999962,100.2799225,360.7177734,1.710000038,3,77,,0,0.1921812,22.5,0.68261826,28.39999962,100.2652664,692.1386719,1.179999948,3,59,,15,0.174449235,23,0.703992009,28,100.1919861,673.828125,1.429999948,3.5,59,,30
2016-06-25 12:00:00,0.12813352,17.29999924,0.668613553,29.39999962,100.162674,270.9960938,0.529999971,1.700000048,92,,-70,0.072536938,17.70000076,0.654754758,29.70000076,100.2212982,265.5029297,0.660000026,1.299999952,114,,-35,0.109293669,19.70000076,0.655471444,29.10000038,100.2212982,521.8505859,1.440000057,3.299999952,99,,0,0.192567468,23.39999962,0.638541639,30.20000076,100.2212982,785.5224609,0.930000007,2.900000095,83,,15,0.174850777,23.89999962,0.653382421,29.79999924,100.1333694,778.1982422,1.210000038,2.900000095,78,,30
2016-06-25 13:00:00,0.127692536,17.39999962,0.615715563,30.89999962,100.0747452,190.4296875,0.5,1.299999952,115,,-70,0.072536938,17.79999924,0.607981205,30.79999924,100.162674,199.5849609,0.680000007,1.399999976,122,,-35,0.109749876,20,0.599025905,30.60000038,100.162674,108.0322266,1.539999962,4.199999809,153,,0,0.192567468,24.39999962,0.577457786,31.89999962,100.1333694,829.4677734,1.029999971,4,154,,15,0.174449235,24.79999924,0.596877635,31.70000076,100.0747452,833.1298828,0.959999979,3.5,123,,30
2016-06-25 14:00:00,0.127692536,17.5,0.566908658,31.5,99.97215271,130.0048828,0.550000012,1.399999976,105,,-70,0.073023044,18,0.550554574,31.39999962,100.045433,170.2880859,0.75999999,1.700000048,120,,-35,0.109749876,20.29999924,0.523633182,31.5,100.0600891,76.90429688,2.029999971,5.300000191,164,,0,0.192567468,25.20000076,0.51818043,32.40000153,100.030777,618.8964844,1.480000019,4.199999809,164,,15,0.174449235,25.70000076,0.532385111,32.20000076,99.97215271,644.53125,1.279999971,3.700000048,144,,30
2016-06-25 15:00:00,0.127251178,17.70000076,0.594470561,30.79999924,99.84025574,87.890625,0.379999995,1.299999952,107,,-70,0.073023044,18.29999924,0.554331601,31,99.89888,91.55273438,0.589999974,1.200000048,122,,-35,0.109749876,20.5,0.515736878,31.39999962,99.91352844,69.58007813,1.5,4.199999809,163,,0,0.192567468,25.60000038,0.526692271,31.89999962,99.88422394,360.7177734,1.070000052,5.199999809,169,,15,0.173645124,26.29999924,0.53726846,31.89999962,99.82559967,384.5214844,0.860000014,3.299999952,137,,30
2016-06-25 16:00:00,0.126809448,17.79999924,0.628376126,29.5,99.84025574,67.74902344,0.730000019,3.200000048,103,0.8,-70,0.073508754,18.5,0.600642979,29.60000038,99.91352844,60.42480469,0.889999986,3.099999905,118,1.45,-35,0.110205702,20.60000038,0.573210239,29.70000076,99.91352844,51.26953125,2.369999886,8.199999809,141,0.95,0,0.190632746,25.70000076,0.578931808,30.10000038,99.89888,258.1787109,1.590000033,5.800000191,144,9.8,15,0.172839627,26.60000038,0.585963368,30.10000038,99.82559967,305.7861328,1.669999957,7.699999809,116,9.6,30
2016-06-25 17:00:00,0.112932801,18.10000038,0.934651256,23.10000038,99.88422394,31.12792969,0.790000021,2.299999952,58,0.85,-70,0.073994078,18.60000038,0.93528378,22.89999962,99.97215271,38.45214844,0.649999976,2.5,127,1.25,-35,0.127692536,20.79999924,0.867272139,23.70000076,99.94284058,27.46582031,1.590000033,4.5,73,0.75,0,0.182019949,25.5,0.882432103,23.79999924,99.94284058,119.0185547,,,,5.4,15,0.172839627,26.70000076,0.872250199,23.79999924,99.84025574,177.6123047,,,,5.4,30
2016-06-25 18:00:00,0.127251178,18.29999924,0.979626596,20.70000076,99.91352844,3.662109375,0.569999993,1.700000048,336,0.65,-70,0.071076281,18.79999924,0.977433145,20.60000038,100.0014648,5.493164063,0.379999995,1.200000048,146,0.55,-35,0.131648242,20.70000076,0.95144695,20.89999962,99.97215271,7.32421875,0.769999981,2.599999905,353,,0,0.185170799,25.10000038,0.951822281,21.10000038,99.95749664,34.79003906,,,,2.4,15,0.172436357,26.29999924,0.927826762,21.10000038,99.86956787,31.12792969,,,,2.2,30
2016-06-25 19:00:00,0.135574386,18.29999924,0.987815559,21.10000038,99.91352844,5.493164063,0.519999981,1.700000048,89,0.4,-70,0.071563557,18.89999962,0.981830716,21,100.0014648,7.32421875,0.550000012,1.5,128,0.05,-35,0.133396849,20.60000038,0.904216886,21.79999924,99.97215271,7.32421875,1.620000005,5.300000191,72,,0,0.185170799,24.60000038,0.910137177,21.89999962,99.95749664,42.11425781,,,,0.8,15,0.172436357,25.70000076,0.900385499,21.79999924,99.86956787,36.62109375,,,,1,30
2016-06-25 20:00:00,0.137309894,18.29999924,0.998055637,20.79999924,99.97215271,1.831054688,0.370000005,1.100000024,268,0.25,-70,0.071563557,18.79999924,0.991923153,20.70000076,100.0600891,3.662109375,0.360000014,0.899999976,140,0.05,-35,0.133833081,20.5,0.938048065,21.20000076,100.030777,3.662109375,0.839999974,2.5,64,,0,0.18712908,24.20000076,0.948113859,21.29999924,100.030777,21.97265625,,,,0.2,15,0.172839627,25.20000076,0.930098474,21.20000076,99.92818451,21.97265625,,,,0.2,30
2016-06-25 21:00:00,0.137742862,18.29999924,1.008377314,20.5,99.98680878,1.831054688,0.280000001,1,266,0.1,-70,0.071563557,18.79999924,0.99791795,20.39999962,100.0747452,3.662109375,0.25999999,0.5,198,,-35,0.134268954,20.39999962,0.979329407,20.5,100.045433,1.831054688,0.610000014,1.299999952,279,,0,0.186346784,23.79999924,0.979626596,20.70000076,100.030777,14.6484375,,,,,15,0.173242539,24.70000076,0.955033481,20.70000076,99.92818451,18.31054688,,,,,30
2016-06-25 22:00:00,0.137309894,18.20000076,1.010325432,20.20000076,100.0014648,0,0.319999993,0.800000012,277,0.05,-70,0.071563557,18.70000076,1.003833532,20.10000038,100.0894012,0,0.219999999,0.5,205,,-35,0.134704471,20.29999924,0.999579966,20.10000038,100.0600891,0,0.519999981,1,280,,0,0.186346784,23.5,0.999898911,20.29999924,100.045433,0,,,,,15,0.174449235,24.39999962,0.972279668,20.20000076,99.92818451,0,,,,,30
2016-06-25 23:00:00,0.136876568,18.10000038,1.015947819,19.70000076,100.045433,0,0.180000007,0.600000024,218,0.05,-70,0.071563557,18.60000038,1.009113312,19.60000038,100.1187134,0,0.280000001,0.5,150,,-35,0.134704471,20.20000076,1.009113312,19.60000038,100.0894012,0,0.370000005,1,244,,0,0.186738104,23.10000038,1.005330682,19.79999924,100.0894012,0,,,,,15,0.174850777,24,0.978401184,19.60000038,99.98680878,0,,,,,30
2016-06-26 00:00:00,0.136008814,18.10000038,1.026180029,19.39999962,100.1040573,0,0.310000002,0.800000012,249,0.05,-70,0.070588611,18.5,1.019176126,19.29999924,100.17733,0,0.280000001,0.5,199,,-35,0.135139614,20.10000038,1.012853026,19.39999962,100.1480179,0,0.709999979,1.200000048,265,,0,0.18712908,22.79999924,1.01350081,19.60000038,100.1333694,0,,,,,15,0.175251976,23.60000038,0.984499872,19.5,100.045433,0,,,,,30
2016-06-26 01:00:00,0.135139614,18,1.024233103,19.5,100.0747452,0,0.370000005,0.899999976,254,,-70,0.071076281,18.39999962,1.023646235,19.29999924,100.1333694,0,0.270000011,0.600000024,202,,-35,0.135139614,19.89999962,1.015403509,19.5,100.1187134,0,0.550000012,1.200000048,264,,0,0.186738104,22.5,1.017888188,19.60000038,100.1040573,0,,,,0.2,15,0.176053345,23.29999924,0.984499872,19.5,100.0161209,0,,,,,30
2016-06-26 02:00:00,0.134268954,17.89999962,1.026180029,19.39999962,100.0894012,0,0.330000013,1.200000048,249,,-70,0.070588611,18.29999924,1.02554369,19.20000076,100.1480179,0,0.270000011,0.600000024,200,,-35,0.135139614,19.79999924,1.019176126,19.29999924,100.1187134,0,0.469999999,1.200000048,258,,0,0.186738104,22.29999924,1.015403509,19.5,100.1187134,0,,,,,15,0.176453516,23,0.987885654,19.29999924,100.030777,0,,,,0.2,30
2016-06-26 03:00:00,0.133833081,17.89999962,1.030622363,19.39999962,100.17733,0,0.25,1,258,,-70,0.070588611,18.20000076,1.023646235,19.29999924,100.2359543,0,0.219999999,0.600000024,202,,-35,0.134704471,19.70000076,1.017295361,19.39999962,100.2066422,0,0.349999994,1.700000048,250,,0,0.187519729,22.10000038,1.011587501,19.70000076,100.1919861,0,,,,,15,0.176853344,22.70000076,0.967984617,19.70000076,100.1187134,0,,,,,30
2016-06-26 04:00:00,0.132960245,17.79999924,1.022903681,19.10000038,100.2506104,0,0.349999994,1.100000024,260,0.05,-70,0.070100546,18.10000038,1.015641093,19,100.3238907,0,0.280000001,1,218,,-35,0.135139614,19.60000038,1.011086583,19,100.2945786,0,0.50999999,2.200000048,251,,0,0.187910035,21.89999962,0.992355704,19.29999924,100.2945786,0,,,,0.2,15,0.176853344,22.39999962,0.95357573,19.20000076,100.2066422,0,,,,0.2,30
2016-06-26 05:00:00,0.132085949,17.70000076,1.000813365,17.5,100.2799225,0,0.460000008,1.5,273,,-70,0.070100546,18.10000038,0.992046595,17.39999962,100.3532028,0,0.280000001,1.200000048,234,0.05,-35,0.135139614,19.5,0.992046595,17.39999962,100.3238907,0,0.620000005,2,273,,0,0.188299999,21.70000076,0.98457247,17.60000038,100.3238907,0,,,,0.4,15,0.177252814,22.20000076,0.950772703,17.5,100.2359543,0,,,,0.2,30
2016-06-26 06:00:00,0.131210178,17.70000076,0.985238075,16,100.3532028,0,0.419999987,1.899999976,268,0.05,-70,0.070100546,18,0.98601383,15.89999962,100.4557877,0,0.270000011,1.200000048,213,,-35,0.134704471,19.39999962,0.974229872,16,100.4118195,0,0.579999983,3.799999952,255,,0,0.187519729,21.5,0.967308342,16.20000076,100.4118195,3.662109375,,,,,15,0.177651957,21.89999962,0.941205084,16,100.3092346,1.831054688,,,,0.2,30
2016-06-26 07:00:00,0.130771756,17.60000038,0.990703523,15.19999981,100.5144119,0,0.310000002,1.399999976,270,,-70,0.070588611,17.89999962,0.991792738,15,100.5876923,1.831054688,0.230000004,0.899999976,168,,-35,0.134704471,19.29999924,0.979600728,15.10000038,100.5437241,0,0.439999998,2.299999952,262,,0,0.186346784,21.29999924,0.978602886,15.30000019,100.5437241,12.81738281,,,,,15,0.178050756,21.60000038,0.95044595,15.10000038,100.4557877,10.98632813,,,,,30
2016-06-26 08:00:00,0.12989381,17.60000038,0.991792738,15,100.5730362,9.155273438,0.230000004,1.100000024,252,,-70,0.070588611,17.79999924,0.986819267,14.80000019,100.660965,12.81738281,0.25999999,0.699999988,147,,-35,0.134704471,19.20000076,0.968318343,15,100.6169968,10.98632813,0.349999994,1.5,266,,0,0.186346784,21,0.967529178,15.19999981,100.6169968,56.76269531,,,,,15,0.178449214,21.20000076,0.944843948,15,100.5144119,56.76269531,,,,,30
2016-06-26 09:00:00,0.129454285,17.5,0.971807301,15.5,100.6169968,20.14160156,0.25999999,1.100000024,247,,-70,0.070588611,17.70000076,0.972846389,15.30000019,100.6902771,23.80371094,0.239999995,0.699999988,164,,-35,0.134268954,19.10000038,0.954758048,15.5,100.660965,21.97265625,0.439999998,2.200000048,266,,0,0.184778139,20.79999924,0.941698611,15.89999962,100.660965,98.87695313,,,,,15,0.178449214,21,0.926071227,15.60000038,100.5583801,100.7080078,,,,,30
2016-06-26 10:00:00,0.128574133,17.39999962,0.936159194,15.89999962,100.6902771,49.43847656,0.360000014,1.799999952,253,,-70,0.071563557,17.60000038,0.931014597,15.80000019,100.7635574,54.93164063,0.230000004,0.800000012,169,,-35,0.134268954,18.89999962,0.919188619,16,100.7195892,58.59375,0.540000021,2.200000048,271,,0,0.183598086,20.79999924,0.912135303,16.39999962,100.7195892,214.2333984,,,,,15,0.178449214,20.79999924,0.891227961,16.20000076,100.6316528,208.7402344,,,,,30
2016-06-26 11:00:00,0.12813352,17.29999924,0.85608077,17.39999962,100.7342453,100.7080078,0.430000007,1.700000048,261,,-70,0.072050445,17.5,0.851045012,17.39999962,100.8221817,188.5986328,0.270000011,1.200000048,228,,-35,0.133833081,18.89999962,0.820019364,17.79999924,100.7928696,283.8134766,0.680000007,2.400000095,276,,0,0.183991775,20.89999962,0.803541303,18.5,100.7782135,536.4990234,,,,,15,0.178449214,20.79999924,0.794646382,18.29999924,100.6902771,525.5126953,0.709999979,3.5,129,,30
2016-06-26 12:00:00,0.127692536,17.29999924,0.774981976,18.70000076,100.7782135,111.6943359,0.469999999,2,265,,-70,0.071076281,17.5,0.770506859,18.60000038,100.8661423,117.1875,0.389999986,1.5,250,,-35,0.133833081,18.79999924,0.747023344,18.89999962,100.8368378,137.3291016,0.639999986,3.599999905,277,,0,0.184778139,21.29999924,0.723808348,19.70000076,100.8221817,505.3710938,0.629999995,4.5,219,,15,0.178847328,21.10000038,0.724101007,19.39999962,100.7342453,520.0195313,0.670000017,3.700000048,152,,30
2016-06-26 13:00:00,0.128574133,17.20000076,0.676311553,20.10000038,100.7928696,164.7949219,0.569999993,1.600000024,278,,-70,0.068633996,17.39999962,0.676311553,20.10000038,100.8514862,190.4296875,0.340000004,1.700000048,245,,-35,0.133833081,18.79999924,0.663686574,20.20000076,100.8221817,109.8632813,0.74000001,3.200000048,275,,0,0.185563132,21.79999924,0.635881305,21.10000038,100.8368378,659.1796875,0.730000019,4.099999905,195,,15,0.178847328,21.60000038,0.631422937,20.79999924,100.7489014,664.6728516,0.769999981,6.099999905,167,,30
2016-06-26 14:00:00,0.129014403,17.20000076,0.639570355,20.79999924,100.7928696,223.3886719,0.49000001,2.200000048,236,,-70,0.067163914,17.5,0.635125339,20.60000038,100.8661423,192.2607422,0.330000013,1.399999976,205,,-35,0.133833081,18.89999962,0.622752786,20.60000038,100.8368378,80.56640625,0.839999974,5.099999905,235,,0,0.186346784,22.29999924,0.60096401,21.5,100.8368378,710.4492188,1.299999952,5,193,,15,0.179245099,22.10000038,0.600191772,21.20000076,100.7489014,725.0976563,1.309999943,6,188,,30
2016-06-26 15:00:00,0.130332962,17.20000076,0.582377017,21.79999924,100.7782135,254.5166016,0.519999981,2,236,,-70,0.067163914,17.5,0.585354567,21.5,100.8368378,192.2607422,0.310000002,1.399999976,207,,-35,0.133396849,19,0.588620722,21.29999924,100.8368378,80.56640625,0.970000029,4.599999905,225,,0,0.186346784,22.70000076,0.56146729,22.39999962,100.8221817,684.8144531,1.190000057,5.199999809,183,,15,0.179245099,22.5,0.564602792,22.20000076,100.7342453,708.6181641,1.129999995,6.900000095,186,,30
2016-06-26 16:00:00,0.130332962,17.29999924,0.569745064,21.5,100.7489014,87.890625,0.449999988,1.399999976,272,,-70,0.067163914,17.60000038,0.588620722,21.29999924,100.8221817,82.39746094,0.25999999,1.299999952,223,,-35,0.133396849,19,0.572818816,21.29999924,100.8075256,51.26953125,0.620000005,2.799999952,268,,0,0.186346784,22.89999962,0.541719139,22.10000038,100.7928696,446.7773438,0.910000026,4,189,,15,0.179245099,22.89999962,0.516579628,22.29999924,100.7195892,589.5996094,0.850000024,4.099999905,185,,30
2016-06-26 17:00:00,0.130771756,17.29999924,0.541246831,22,100.7489014,98.87695313,0.409999996,1.799999952,252,,-70,0.067163914,17.70000076,0.548816681,22,100.8075256,161.1328125,0.25999999,1.399999976,206,,-35,0.132960245,19,0.536399841,21.79999924,100.7782135,49.43847656,0.670000017,3.200000048,231,,0,0.186346784,22.70000076,0.523472786,22.20000076,100.7782135,162.9638672,0.970000029,3.799999952,198,,15,0.178847328,23.10000038,0.490934372,22.89999962,100.6902771,483.3984375,0.930000007,4.599999905,188,,30
2016-06-26 18:00:00,0.130771756,17.29999924,0.581452191,21.5,100.7489014,58.59375,0.340000004,1.399999976,253,,-70,0.067163914,17.79999924,0.604422629,21.29999924,100.8075256,75.07324219,0.219999999,1.100000024,191,,-35,0.132960245,19,0.580719769,21.29999924,100.7928696,42.11425781,0.439999998,2.799999952,247,,0,0.186346784,22.5,0.551252186,21.70000076,100.7928696,140.9912109,0.74000001,3,182,,15,0.178847328,23.20000076,0.51225549,22.20000076,100.7049332,355.2246094,0.819999993,4.099999905,174,,30
2016-06-26 19:00:00,0.130771756,17.39999962,0.655865133,20.79999924,100.7342453,25.63476563,0.289999992,1.5,258,,-70,0.067163914,17.79999924,0.659938812,20.79999924,100.8075256,31.12792969,0.189999998,0.800000012,159,,-35,0.132523268,19,0.602907062,20.79999924,100.7782135,23.80371094,0.340000004,1.799999952,280,,0,0.185955137,22.29999924,0.595536649,21,100.7782135,60.42480469,0.449999988,2.5,164,,15,0.178449214,23.20000076,0.531362116,21.60000038,100.6902771,150.1464844,0.460000008,2.599999905,116,,30
2016-06-26 20:00:00,0.130771756,17.39999962,0.759345174,19.5,100.7195892,10.98632813,0.280000001,0.800000012,212,,-70,0.0666731,17.79999924,0.759912014,19.29999924,100.7928696,10.98632813,0.239999995,0.600000024,152,,-35,0.132523268,19,0.64566493,19.79999924,100.7635574,9.155273438,0.270000011,1,238,,0,0.185563132,22,0.633431613,20,100.7635574,27.46582031,0.330000013,2.200000048,205,,15,0.178050756,22.89999962,0.591822445,20.20000076,100.675621,38.45214844,0.319999993,3.200000048,168,,30
2016-06-26 21:00:00,0.130771756,17.39999962,0.784745038,18.5,100.7342453,1.831054688,0.25,0.600000024,241,,-70,0.0666731,17.79999924,0.718749106,18.39999962,100.8221817,1.831054688,0.200000003,0.300000012,168,,-35,0.132523268,19,0.645636141,18.79999924,100.7928696,1.831054688,0.370000005,0.800000012,273,,0,0.185170799,21.70000076,0.66452992,18.89999962,100.7782135,10.98632813,0.349999994,0.800000012,269,,15,0.177651957,22.5,0.664082885,18.79999924,100.6902771,14.6484375,0.300000012,0.600000024,257,,30
2016-06-26 22:00:00,0.130771756,17.29999924,0.784852982,16.89999962,100.7782135,0,0.349999994,0.600000024,251,,-70,0.0666731,17.79999924,0.779655337,16.89999962,100.8514862,0,0.219999999,0.300000012,186,,-35,0.132523268,18.89999962,0.784617782,16.79999924,100.8221817,0,0.479999989,1,267,,0,0.184778139,21.29999924,0.831728578,16.70000076,100.8221817,0,0.379999995,0.899999976,241,,15,0.177252814,22,0.858565986,16.29999924,100.7195892,0,0.349999994,0.800000012,205,,30
2016-06-26 23:00:00,0.130771756,17.29999924,0.839657784,15.10000038,100.8075256,0,0.449999988,0.800000012,255,,-70,0.066181891,17.70000076,0.827995837,15.10000038,100.8807983,0,0.310000002,0.600000024,215,,-35,0.132085949,18.89999962,0.81633395,15.10000038,100.8368378,0,0.5,0.800000012,275,,0,0.184778139,20.89999962,0.839657784,15.10000038,100.8514862,0,0.379999995,0.699999988,259,,15,0.177252814,21.60000038,0.891241431,14.60000038,100.7342453,0,0.289999992,0.600000024,225,,30
2016-06-27 00:00:00,0.130771756,17.20000076,0.914323032,14.10000038,100.8075256,0,0.610000014,0.899999976,258,,-70,0.066181891,17.60000038,0.901883245,14.10000038,100.8807983,0,0.289999992,0.600000024,219,,-35,0.132085949,18.70000076,0.889443517,14.10000038,100.8514862,0,0.610000014,0.899999976,277,,0,0.184778139,20.5,0.884135306,14.30000019,100.8514862,0,0.449999988,0.699999988,269,,15,0.176853344,21.10000038,0.907750905,14,100.7489014,0,0.25999999,0.600000024,259,,30
2016-06-27 01:00:00,0.130771756,17.20000076,0.963606894,13.5,100.7928696,0,0.649999976,1,258,,-70,0.065690286,17.5,0.950377464,13.39999962,100.8661423,0,0.239999995,0.400000006,208,,-35,0.132085949,18.60000038,0.944205403,13.5,100.8221817,0,0.730000019,0.899999976,274,,0,0.184778139,20.10000038,0.925957084,13.80000019,100.8368378,0,0.550000012,0.800000012,271,,15,0.176853344,20.70000076,0.950042725,13.30000019,100.7342453,0,0.25999999,0.600000024,283,,30
2016-06-27 02:00:00,0.130771756,17.10000038,0.975198328,12.89999962,100.7782135,0,0.649999976,1,252,,-70,0.065690286,17.39999962,0.961747348,12.89999962,100.8368378,0,0.25,0.5,194,,-35,0.132085949,18.5,0.955021799,12.89999962,100.8221817,0,0.730000019,1.200000048,273,,0,0.184385121,19.79999924,0.936478019,13.19999981,100.8368378,0,0.579999983,1.100000024,271,,15,0.176853344,20.29999924,0.960798681,12.69999981,100.7342453,0,0.289999992,0.699999988,246,,30
2016-06-27 03:00:00,0.130771756,17,0.973485947,12.5,100.7782135,0,0.579999983,1.299999952,249,,-70,0.065690286,17.29999924,0.966581821,12.5,100.8514862,0,0.25999999,0.5,191,,-35,0.132085949,18.39999962,0.959677637,12.5,100.8221817,0,0.620000005,1.299999952,274,,0,0.183991775,19.39999962,0.947170317,12.69999981,100.8221817,0,0.569999993,1.299999952,271,,15,0.176453516,19.89999962,0.958379328,12.30000019,100.7049332,0,0.379999995,1.200000048,247,,30
2016-06-27 04:00:00,0.130771756,16.89999962,0.985828698,12.19999981,100.7782135,0,0.689999998,1,253,,-70,0.065690286,17.20000076,0.971745431,12.19999981,100.8514862,0,0.270000011,0.5,193,,-35,0.132085949,18.20000076,0.964703798,12.19999981,100.8075256,0,0.670000017,1,269,,0,0.183598086,19.10000038,0.959050953,12.39999962,100.8221817,0,0.540000021,1.299999952,256,,15,0.176453516,19.60000038,0.963223398,12,100.7049332,0,0.460000008,1,221,,30
2016-06-27 05:00:00,0.130771756,16.79999924,0.996320367,11.60000038,100.7928696,0,0.680000007,1,257,,-70,0.065690286,17,0.981668591,11.60000038,100.8661423,0,0.280000001,0.5,199,,-35,0.132085949,18.10000038,0.974342704,11.60000038,100.8221817,1.831054688,0.720000029,1.100000024,269,,0,0.183598086,18.79999924,0.97601366,11.80000019,100.8221817,1.831054688,0.529999971,0.899999976,260,,15,0.176453516,19.20000076,0.973433793,11.5,100.7195892,1.831054688,0.439999998,0.899999976,233,,30
2016-06-27 06:00:00,0.130771756,16.70000076,0.997035325,11.69999981,100.8221817,0,0.75,1.299999952,258,,-70,0.065690286,16.89999962,0.982480109,11.69999981,100.9101105,3.662109375,0.280000001,0.600000024,201,,-35,0.131648242,18,0.950620532,12.19999981,100.8661423,45.77636719,0.699999988,1.600000024,269,,0,0.183598086,18.60000038,0.946542025,12.60000038,100.8661423,64.08691406,0.439999998,1.299999952,244,,15,0.176053345,18.89999962,0.957662165,12.19999981,100.7635574,53.10058594,0.419999987,1.100000024,200,,30
2016-06-27 07:00:00,0.130771756,16.60000038,0.988372922,12.80000019,100.8368378,10.98632813,0.529999971,1.100000024,257,,-70,0.065690286,16.79999924,0.974833608,12.80000019,100.9101105,21.97265625,0.239999995,0.5,180,,-35,0.131648242,17.89999962,0.907360196,13.89999962,100.8661423,106.2011719,0.600000024,1.399999976,276,,0,0.184778139,18.39999962,0.885219514,14.60000038,100.8807983,144.6533203,0.360000014,1.399999976,259,,15,0.176053345,18.70000076,0.890275121,14.30000019,100.7782135,131.8359375,0.300000012,1.200000048,230,,30
2016-06-27 08:00:00,0.131210178,16.5,0.96927166,14.69999981,100.8075256,31.12792969,0.5,1.5,260,,-70,0.065690286,16.70000076,0.951322198,14.69999981,100.8954544,36.62109375,0.239999995,0.899999976,178,,-35,0.131210178,17.70000076,0.897985578,15.39999962,100.8514862,71.41113281,0.469999999,1.299999952,279,,0,0.184778139,18.39999962,0.875055194,16.10000038,100.8661423,168.4570313,0.349999994,1.299999952,264,,15,0.176053345,18.5,0.864117026,16.10000038,100.7635574,168.4570313,0.25999999,1.200000048,228,,30
2016-06-27 09:00:00,0.131210178,16.5,0.842256784,16.70000076,100.8514862,51.26953125,0.689999998,1.5,269,,-70,0.065690286,16.60000038,0.837030768,16.60000038,100.9247665,54.93164063,0.430000007,1.100000024,248,,-35,0.131210178,17.70000076,0.821233273,16.79999924,100.8954544,65.91796875,0.629999995,1.5,279,,0,0.184778139,18.60000038,0.795646608,17.5,100.8954544,225.2197266,0.430000007,1.799999952,264,,15,0.176053345,18.60000038,0.795651555,17.39999962,100.8075256,238.0371094,0.379999995,2.5,172,,30
2016-06-27 10:00:00,0.131210178,16.39999962,0.785671771,17.70000076,100.8954544,78.73535156,0.579999983,1.5,254,,-70,0.065690286,16.60000038,0.775789082,17.70000076,100.9833908,80.56640625,0.330000013,1.100000024,222,,-35,0.130771756,17.70000076,0.751439631,17.89999962,100.9394226,91.55273438,0.680000007,1.799999952,266,,0,0.184778139,18.89999962,0.728575885,18.70000076,100.9540787,322.265625,0.600000024,2.900000095,212,,15,0.176053345,18.89999962,0.723657072,18.5,100.8514862,338.7451172,0.639999986,3.200000048,189,,30
2016-06-27 11:00:00,0.131210178,16.39999962,0.713136911,18.10000038,100.8954544,84.22851563,0.479999989,1.5,257,,-70,0.065690286,16.5,0.707936168,18,100.9980469,93.38378906,0.25999999,1,217,,-35,0.130771756,17.70000076,0.689962447,18.29999924,100.9687347,108.0322266,0.589999974,2.5,263,,0,0.185170799,19.39999962,0.674057722,19,100.9540787,346.0693359,0.689999998,2.799999952,192,,15,0.176053345,19.29999924,0.668247938,18.70000076,100.8661423,357.0556641,0.879999995,4.900000095,173,,30
2016-06-27 12:00:00,0.131210178,16.39999962,0.64566493,19.79999924,100.9101105,216.0644531,0.439999998,1.5,253,,-70,0.065690286,16.5,0.641331613,19.79999924,100.9833908,184.9365234,0.270000011,0.800000012,189,,-35,0.130771756,17.79999924,0.621015608,20.10000038,100.9540787,375.3662109,0.730000019,2.900000095,229,,0,0.185955137,19.89999962,0.59920913,20.89999962,100.9540787,739.7460938,0.980000019,4.400000095,183,,15,0.176053345,19.70000076,0.602131784,20.60000038,100.8661423,747.0703125,0.800000012,3.700000048,175,,30
2016-06-27 13:00:00,0.131648242,16.39999962,0.575892508,21.10000038,100.8661423,186.7675781,0.560000002,1.799999952,255,,-70,0.065690286,16.60000038,0.575892508,21.10000038,100.9394226,201.4160156,0.360000014,1.600000024,194,,-35,0.130771756,17.89999962,0.566819429,20.89999962,100.9101105,97.04589844,1.110000014,4.599999905,228,,0,0.186346784,20.70000076,0.551725566,21.79999924,100.9247665,787.3535156,1.350000024,5.300000191,198,,15,0.176453516,20.29999924,0.550233245,21.5,100.8368378,800.1708984,1.25,6.300000191,188,,30
2016-06-27 14:00:00,0.131648242,16.5,0.545031786,22,100.8368378,172.1191406,0.460000008,1.799999952,241,,-70,0.065690286,16.70000076,0.555983365,21.89999962,100.8954544,177.6123047,0.340000004,1.5,166,,-35,0.130771756,18.10000038,0.538526177,21.5,100.8807983,75.07324219,1.350000024,6.300000191,208,,0,0.18712908,21.39999962,0.528222501,22.39999962,100.8807983,745.2392578,1.649999976,7.699999809,201,,15,0.176453516,21,0.527728796,22.29999924,100.7928696,767.2119141,1.629999995,5.900000095,194,,30
2016-06-27 15:00:00,0.131648242,16.5,0.53524065,21.60000038,100.8221817,195.9228516,0.5,2.099999905,267,,-70,0.065690286,16.79999924,0.553613424,21.39999962,100.8807983,122.6806641,0.270000011,1.5,214,,-35,0.130771756,18.20000076,0.530055404,21.39999962,100.8661423,78.73535156,0.769999981,3.700000048,251,,0,0.187910035,21.79999924,0.513447046,22.39999962,100.8661423,541.9921875,0.980000019,5.099999905,202,,15,0.176453516,21.60000038,0.50914681,22.29999924,100.7782135,578.6132813,1.059999943,5.300000191,196,,30
2016-06-27 16:00:00,0.132085949,16.60000038,0.554633439,21.60000038,100.7928696,86.05957031,0.439999998,1.5,236,,-70,0.065690286,17,0.558037996,21.5,100.8514862,95.21484375,0.289999992,1.100000024,180,,-35,0.130771756,18.29999924,0.530721426,21.5,100.8368378,53.10058594,1.029999971,5.199999809,212,,0,0.187910035,22,0.515385568,22.10000038,100.8221817,355.2246094,1.350000024,4.699999809,192,,15,0.176053345,21.89999962,0.497299135,22.20000076,100.7489014,501.7089844,1.330000043,5.300000191,188,,30
2016-06-27 17:00:00,0.132085949,16.70000076,0.503596544,22.60000038,100.7635574,115.3564453,0.439999998,2,220,,-70,0.066181891,17.10000038,0.500549674,22.70000076,100.8221817,210.5712891,0.360000014,1.299999952,173,,-35,0.130771756,18.29999924,0.478603691,22.20000076,100.8075256,47.60742188,1.269999981,4.900000095,203,,0,0.187910035,21.79999924,0.476508409,22.39999962,100.8075256,102.5390625,1.700000048,5.5,196,,15,0.175652832,22.10000038,0.451978832,23.39999962,100.6902771,628.0517578,1.620000005,6,185,,30
2016-06-27 18:00:00,0.132085949,16.70000076,0.532568455,21.79999924,100.7489014,45.77636719,0.409999996,1.5,252,,-70,0.065690286,17.20000076,0.546876311,21.60000038,100.8075256,62.25585938,0.270000011,1.200000048,165,,-35,0.130771756,18.29999924,0.501138389,21.70000076,100.7782135,32.95898438,0.629999995,3.400000095,223,,0,0.187519729,21.60000038,0.484472662,22,100.7782135,98.87695313,1.00999999,3.400000095,201,,15,0.175251976,22.29999924,0.447932839,22.89999962,100.6902771,362.5488281,0.970000029,4.099999905,180,,30
2016-06-27 19:00:00,0.132085949,16.79999924,0.607608378,21,100.7195892,21.97265625,0.280000001,1.600000024,247,,-70,0.065690286,17.29999924,0.627727866,21,100.7928696,25.63476563,0.189999998,0.699999988,155,,-35,0.130771756,18.29999924,0.548519611,21.20000076,100.7635574,21.97265625,0.310000002,1.299999952,249,,0,0.18712908,21.29999924,0.519014359,21.5,100.7635574,62.25585938,0.579999983,2.400000095,199,,15,0.174850777,22.29999924,0.476902783,22,100.675621,126.3427734,0.579999983,2.5,177,,30
2016-06-27 20:00:00,0.132085949,16.79999924,0.646993399,20.29999924,100.7342453,16.47949219,0.300000012,0.800000012,195,,-70,0.065690286,17.29999924,0.64228332,20.10000038,100.7928696,16.47949219,0.25999999,0.5,154,,-35,0.130771756,18.29999924,0.549246728,20.70000076,100.7782135,12.81738281,0.629999995,1.700000048,203,,0,0.186738104,21,0.554673314,20.89999962,100.7782135,56.76269531,0.99000001,2,203,,15,0.174449235,22.10000038,0.550624609,20.89999962,100.6902771,73.2421875,0.730000019,1.899999976,189,,30
2016-06-27 21:00:00,0.132085949,16.79999924,0.697646618,19.70000076,100.7489014,7.32421875,0.230000004,0.5,236,,-70,0.065690286,17.29999924,0.66689229,19.60000038,100.8075256,7.32421875,0.200000003,0.300000012,158,,-35,0.130771756,18.29999924,0.60722208,19.89999962,100.7782135,7.32421875,0.330000013,1,263,,0,0.186346784,20.79999924,0.591822445,20.20000076,100.7928696,31.12792969,0.419999987,1.200000048,242,,15,0.173645124,21.89999962,0.633061349,19.89999962,100.7049332,38.45214844,0.25999999,0.899999976,228,,30
2016-06-27 22:00:00,0.132085949,16.79999924,0.686451554,18.60000038,100.7489014,0,0.439999998,0.800000012,252,,-70,0.065690286,17.29999924,0.680920184,18.39999962,100.8221817,0,0.219999999,0.400000006,196,,-35,0.130332962,18.29999924,0.676666379,18.5,100.7928696,0,0.550000012,1.200000048,274,,0,0.186346784,20.5,0.65896672,18.70000076,100.7928696,3.662109375,0.439999998,1,273,,15,0.173242539,21.60000038,0.694720805,18.29999924,100.6902771,3.662109375,0.370000005,1,267,,30
2016-06-27 23:00:00,0.132085949,16.79999924,0.75803113,16.70000076,100.7782135,0,0.419999987,0.699999988,247,,-70,0.065690286,17.29999924,0.747502923,16.70000076,100.8368378,0,0.25,0.400000006,194,,-35,0.130332962,18.29999924,0.721848369,16.79999924,100.8075256,0,0.600000024,0.899999976,266,,0,0.186346784,20.29999924,0.703116596,17.10000038,100.8221817,0,0.409999996,0.800000012,268,,15,0.172839627,21.29999924,0.712085187,16.89999962,100.7195892,0,0.409999996,1,263,,30
2016-06-28 00:00:00,0.131648242,16.79999924,0.812190831,15.39999962,100.7782135,0,0.449999988,0.800000012,251,,-70,0.065690286,17.20000076,0.795031846,15.39999962,100.8514862,0,0.239999995,0.400000006,198,,-35,0.130332962,18.20000076,0.783592522,15.39999962,100.8221817,0,0.579999983,1,271,,0,0.186346784,19.89999962,0.817421257,15.30000019,100.8368378,0,0.439999998,0.899999976,254,,15,0.172839627,20.89999962,0.861574829,14.69999981,100.7195892,0,0.379999995,0.800000012,205,,30
2016-06-28 01:00:00,0.131648242,16.70000076,0.820367873,14.80000019,100.7782135,0,0.579999983,1,254,,-70,0.065690286,17.20000076,0.808478475,14.80000019,100.8514862,0,0.330000013,0.699999988,219,,-35,0.12989381,18.10000038,0.796589077,14.80000019,100.8075256,0,0.720000029,1.200000048,275,,0,0.186346784,19.60000038,0.769686282,15.10000038,100.8221817,0,0.680000007,1.100000024,276,,15,0.172436357,20.5,0.813709557,14.69999981,100.7195892,0,0.5,1.200000048,267,,30
2016-06-28 02:00:00,0.131648242,16.70000076,0.857668042,14,100.7635574,0,0.49000001,0.899999976,252,,-70,0.065690286,17.10000038,0.851407707,14,100.8368378,0,0.439999998,0.899999976,221,,-35,0.12989381,18,0.833464563,14.10000038,100.7928696,0,0.649999976,1.299999952,273,,0,0.185955137,19.20000076,0.81743139,14.39999962,100.8075256,0,0.629999995,1.200000048,268,,15,0.172032744,20.10000038,0.845147371,14,100.6902771,0,0.660000026,2,242,,30
2016-06-28 03:00:00,0.131648242,16.60000038,0.870188773,14,100.7489014,0,0.430000007,0.899999976,251,,-70,0.065690286,17,0.869553506,13.89999962,100.8221817,0,0.409999996,0.899999976,210,,-35,0.12989381,17.89999962,0.851407707,14,100.7928696,0,0.479999989,1.200000048,264,,0,0.185563132,18.89999962,0.84662044,14.19999981,100.7928696,0,0.479999989,1.799999952,242,,15,0.172032744,19.70000076,0.834261,14.19999981,100.6902771,0,0.639999986,2.5,224,,30
2016-06-28 04:00:00,0.131210178,16.60000038,0.879533768,13.5,100.7342453,0,0.540000021,1.200000048,251,,-70,0.065198295,16.89999962,0.884522557,13.30000019,100.8075256,0,0.370000005,0.699999988,208,,-35,0.129454285,17.79999924,0.860132337,13.5,100.7635574,0,0.49000001,1,259,,0,0.185170799,18.70000076,0.891792536,13.39999962,100.7782135,0,0.540000021,1.200000048,225,,15,0.171628788,19.39999962,0.877970517,13.30000019,100.675621,0,0.600000024,1.600000024,205,,30
2016-06-28 05:00:00,0.131210178,16.5,0.893694401,13.69999981,100.7342453,0,0.479999989,1.100000024,250,,-70,0.065198295,16.79999924,0.886676669,13.60000038,100.8075256,0,0.379999995,0.800000012,204,,-35,0.129454285,17.70000076,0.873826265,13.60000038,100.7635574,0,0.430000007,0.899999976,259,,0,0.185170799,18.39999962,0.893694401,13.69999981,100.7782135,0,0.50999999,1.100000024,230,,15,0.171628788,19.10000038,0.898935258,13.5,100.675621,0,0.50999999,1.100000024,210,,30
2016-06-28 06:00:00,0.131210178,16.39999962,0.871855676,14.30000019,100.7635574,1.831054688,0.5,1.100000024,251,,-70,0.065198295,16.70000076,0.871339262,14.19999981,100.8221817,3.662109375,0.439999998,0.699999988,213,,-35,0.129454285,17.60000038,0.837044299,14.60000038,100.7928696,16.47949219,0.50999999,1,263,,0,0.185170799,18.20000076,0.856036007,14.80000019,100.8075256,34.79003906,0.460000008,1.299999952,233,,15,0.171628788,18.89999962,0.872773349,14.5,100.6902771,29.296875,0.550000012,1.399999976,199,,30
2016-06-28 07:00:00,0.131210178,16.29999924,0.885976195,14.89999962,100.7635574,9.155273438,0.400000006,1,249,,-70,0.065198295,16.60000038,0.879814804,14.80000019,100.8368378,10.98632813,0.400000006,0.699999988,209,,-35,0.129014403,17.5,0.862350166,14.89999962,100.7928696,12.81738281,0.409999996,0.800000012,260,,0,0.185563132,18.20000076,0.869038224,15.19999981,100.8075256,53.10058594,0.439999998,1.399999976,233,,15,0.171628788,18.70000076,0.868812561,15.10000038,100.7195892,56.76269531,0.529999971,1.700000048,208,,30
2016-06-28 08:00:00,0.130771756,16.29999924,0.920659542,15.5,100.7635574,29.296875,0.25,0.600000024,242,,-70,0.065198295,16.5,0.909293354,15.5,100.8368378,31.12792969,0.330000013,0.699999988,198,,-35,0.129014403,17.5,0.869686365,15.89999962,100.7928696,38.45214844,0.629999995,2.299999952,215,,0,0.185170799,18.20000076,0.863965809,16.29999924,100.8075256,140.9912109,0.819999993,2.299999952,203,,15,0.171628788,18.70000076,0.85318774,16.20000076,100.7049332,148.3154297,0.810000002,2,191,,30
2016-06-28 09:00:00,0.130771756,16.20000076,0.851675451,17.20000076,100.7489014,69.58007813,0.330000013,1.399999976,216,,-70,0.065198295,16.5,0.841475785,17.20000076,100.8368378,65.91796875,0.360000014,1.200000048,175,,-35,0.129014403,17.39999962,0.815899312,17.29999924,100.7928696,95.21484375,1.889999986,4.599999905,195,,0,0.185955137,18.39999962,0.810378432,17.70000076,100.8075256,272.8271484,2.039999962,4,200,,15,0.171628788,18.79999924,0.810378432,17.70000076,100.7195892,276.4892578,1.669999957,4.099999905,192,,30
2016-06-28 10:00:00,0.130771756,16.20000076,0.79782182,18.79999924,100.7489014,86.05957031,0.430000007,1.700000048,254,,-70,0.065198295,16.39999962,0.788598418,18.79999924,100.8368378,82.39746094,0.300000012,1.299999952,200,,-35,0.129014403,17.39999962,0.76944083,19.10000038,100.8075256,102.5390625,1.159999967,5,221,,0,0.186346784,18.70000076,0.759345174,19.5,100.7928696,331.4208984,1.580000043,5,204,,15,0.17122449,19,0.75963974,19.39999962,100.7195892,346.0693359,1.649999976,5.800000191,200,,30
2016-06-28 11:00:00,0.130771756,16.20000076,0.732528925,19.70000076,100.7782135,111.6943359,0.569999993,1.799999952,262,,-70,0.065690286,16.39999962,0.732528925,19.70000076,100.8368378,161.1328125,0.289999992,1.200000048,235,,-35,0.129014403,17.5,0.710339785,20.10000038,100.8075256,155.6396484,0.790000021,3,264,,0,0.186346784,19.29999924,0.692528427,20.79999924,100.8221817,459.5947266,0.870000005,5.099999905,195,,15,0.171628788,19.39999962,0.701465368,20.39999962,100.7342453,468.75,1.00999999,4.599999905,183,,30
2016-06-28 12:00:00,0.130771756,16.20000076,0.723664761,19.79999924,100.8221817,217.8955078,0.689999998,2.299999952,272,,-70,0.065690286,16.5,0.714885592,19.89999962,100.8807983,267.3339844,0.340000004,1.799999952,254,,-35,0.129014403,17.60000038,0.697579205,20.10000038,100.8661423,390.0146484,0.850000024,3.299999952,278,,0,0.186738104,20,0.688607812,20.70000076,100.8661423,657.3486328,0.800000012,5.699999809,186,,15,0.171628788,19.89999962,0.693207204,20.29999924,100.7782135,682.9833984,0.939999998,5.599999905,156,,30
2016-06-28 13:00:00,0.130771756,16.29999924,0.724101007,19.39999962,100.8514862,122.6806641,0.579999983,1.600000024,279,,-70,0.065690286,16.5,0.719612002,19.5,100.9247665,119.0185547,0.270000011,1.299999952,242,,-35,0.129014403,17.70000076,0.710782409,19.5,100.8954544,87.890625,0.699999988,2.900000095,285,,0,0.187910035,20.70000076,0.693277717,20.20000076,100.8954544,551.1474609,0.829999983,5,49,,15,0.171628788,20.5,0.697664797,19.79999924,100.8075256,563.9648438,0.889999986,4.5,51,,30
2016-06-28 14:00:00,0.130771756,16.29999924,0.638322771,20.20000076,100.8368378,148.3154297,0.529999971,1.399999976,283,,-70,0.065690286,16.60000038,0.638322771,20.20000076,100.8954544,144.6533203,0.280000001,1.100000024,242,,-35,0.128574133,17.89999962,0.63409543,20.20000076,100.8661423,73.2421875,0.649999976,2.599999905,283,,0,0.187910035,21.10000038,0.615885019,21.10000038,100.8807983,628.0517578,0.879999995,4.199999809,77,,15,0.171628788,21,0.611355245,20.89999962,100.7928696,628.0517578,0.829999983,4.300000191,58,,30
2016-06-28 15:00:00,0.130771756,16.39999962,0.582037568,20.70000076,100.7928696,225.2197266,0.50999999,1.600000024,274,,-70,0.065690286,16.70000076,0.589257538,20.5,100.8661423,181.2744141,0.25999999,1.100000024,239,,-35,0.128574133,18.10000038,0.584554434,20.39999962,100.8368378,73.2421875,0.620000005,2.900000095,276,,0,0.187910035,21.29999924,0.561940372,21.5,100.8368378,639.0380859,0.649999976,3.299999952,101,,15,0.171628788,21.60000038,0.557539761,21.39999962,100.7635574,650.0244141,0.75,4.300000191,62,,30
2016-06-28 16:00:00,0.130771756,16.5,0.578965604,20.89999962,100.7635574,86.05957031,0.479999989,1.5,256,,-70,0.065690286,16.79999924,0.586136401,20.70000076,100.8368378,78.73535156,0.280000001,1,198,,-35,0.128574133,18.10000038,0.573839843,20.70000076,100.8075256,47.60742188,0.620000005,2.900000095,273,,0,0.187910035,21.39999962,0.543542385,21.70000076,100.8075256,309.4482422,0.779999971,3.200000048,134,,15,0.171628788,22,0.532568455,21.79999924,100.7195892,492.5537109,0.769999981,3.400000095,91,,30
2016-06-28 17:00:00,0.130332962,16.5,0.575892508,21.10000038,100.7195892,86.05957031,0.439999998,1.600000024,268,,-70,0.065690286,16.89999962,0.588267386,21.20000076,100.7928696,131.8359375,0.239999995,0.800000012,164,,-35,0.12813352,18.10000038,0.555896223,21.10000038,100.7782135,54.93164063,0.649999976,2.400000095,179,,0,0.187910035,21.29999924,0.546876311,21.60000038,100.7635574,177.6123047,0.779999971,2.5,118,,15,0.171628788,22.39999962,0.513447046,22.39999962,100.675621,494.3847656,0.75,2.5,80,,30
2016-06-28 18:00:00,0.130332962,16.60000038,0.599560559,21,100.7195892,64.08691406,0.360000014,1,272,,-70,0.065690286,17,0.619452715,20.89999962,100.7782135,75.07324219,0.180000007,0.600000024,166,,-35,0.12813352,18.10000038,0.587063015,20.89999962,100.7782135,43.9453125,0.409999996,1.600000024,286,,0,0.187910035,21.10000038,0.572818816,21.29999924,100.7635574,124.5117188,0.560000002,2.200000048,47,,15,0.17122449,22.70000076,0.517140925,22.39999962,100.675621,366.2109375,0.519999981,2.099999905,57,,30
2016-06-28 19:00:00,0.130332962,16.60000038,0.651360691,20.39999962,100.7049332,25.63476563,0.330000013,0.899999976,256,,-70,0.065690286,17,0.676402211,20.29999924,100.7782135,29.296875,0.209999993,0.800000012,162,,-35,0.127692536,18.20000076,0.626308322,20.39999962,100.7489014,23.80371094,0.360000014,2.099999905,244,,0,0.187910035,20.89999962,0.606256008,20.60000038,100.7635574,65.91796875,0.519999981,2.599999905,182,,15,0.17122449,22.79999924,0.555896223,21.10000038,100.660965,117.1875,0.419999987,3.700000048,141,,30
2016-06-28 20:00:00,0.12989381,16.60000038,0.728168607,19.70000076,100.6902771,14.6484375,0.25,0.800000012,252,,-70,0.065690286,17.10000038,0.732856393,19.5,100.7489014,14.6484375,0.209999993,0.400000006,154,,-35,0.127692536,18.20000076,0.671664894,19.79999924,100.7342453,12.81738281,0.270000011,0.899999976,271,,0,0.18712908,20.70000076,0.6550439,20.10000038,100.7342453,43.9453125,0.319999993,1.600000024,217,,15,0.170819849,22.70000076,0.609182119,20.29999924,100.6463089,60.42480469,0.300000012,1.200000048,85,,30
2016-06-28 21:00:00,0.12989381,16.60000038,0.714654028,18.70000076,100.675621,1.831054688,0.280000001,0.600000024,245,,-70,0.065690286,17.10000038,0.705130517,18.60000038,100.7489014,1.831054688,0.209999993,0.5,169,,-35,0.127692536,18.10000038,0.677529156,18.70000076,100.7342453,1.831054688,0.400000006,1.100000024,273,,0,0.186738104,20.5,0.70537281,18.70000076,100.7195892,12.81738281,0.370000005,1.200000048,266,,15,0.170009524,22.39999962,0.709800243,18.60000038,100.6316528,18.31054688,0.230000004,0.899999976,250,,30
2016-06-28 22:00:00,0.12989381,16.60000038,0.805540919,16.79999924,100.660965,0,0.330000013,0.600000024,246,,-70,0.065690286,17.10000038,0.800143957,16.70000076,100.7489014,0,0.219999999,0.5,179,,-35,0.127692536,18.10000038,0.794649422,16.60000038,100.7195892,0,0.519999981,2.200000048,258,,0,0.186346784,20.20000076,0.836966872,16.29999924,100.7195892,0,0.479999989,1.700000048,228,,15,0.16960384,22,0.847635031,16,100.6169968,0,0.340000004,1.299999952,203,,30
2016-06-28 23:00:00,0.12989381,16.60000038,0.874420822,15,100.675621,0,0.589999974,1,257,,-70,0.065690286,17,0.862683594,15,100.7489014,0,0.330000013,0.600000024,223,,-35,0.127692536,18.10000038,0.856814981,15,100.7049332,0,0.680000007,1.299999952,271,,0,0.186346784,19.79999924,0.867925406,14.80000019,100.7195892,0,0.620000005,1,250,,15,0.169197798,21.5,0.884533942,14.39999962,100.6169968,0,0.430000007,0.899999976,215,,30
2016-06-29 00:00:00,0.129454285,16.60000038,0.914323032,14.10000038,100.6463089,0,0.449999988,0.899999976,264,,-70,0.065690286,17,0.91401124,14,100.7195892,0,0.330000013,0.699999988,220,,-35,0.127692536,18,0.913272738,13.80000019,100.675621,0,0.479999989,0.899999976,274,,0,0.186346784,19.39999962,0.919614911,13.80000019,100.6902771,0,0.460000008,0.899999976,252,,15,0.168791428,21,0.924339712,13.39999962,100.5730362,0,0.300000012,0.899999976,226,,30
2016-06-29 01:00:00,0.129454285,16.5,0.911320865,13.39999962,100.6169968,0,0.280000001,0.800000012,280,,-70,0.065198295,16.89999962,0.904178619,13.30000019,100.6902771,0,0.230000004,0.600000024,161,,-35,0.127251178,17.89999962,0.92269969,13.10000038,100.6463089,0,0.330000013,1.299999952,300,,0,0.186346784,19.10000038,0.935431898,13,100.6463089,0,0.340000004,1.100000024,290,,15,0.168384701,20.60000038,0.940356135,12.69999981,100.5583801,0,0.310000002,1.299999952,18,,30
2016-06-29 02:00:00,0.129014403,16.5,0.942113578,13,100.5730362,0,0.209999993,0.600000024,202,,-70,0.065198295,16.79999924,0.940356135,12.69999981,100.6463089,0,0.25,0.5,138,,-35,0.127251178,17.79999924,0.95210135,12.39999962,100.5876923,0,0.319999993,0.800000012,291,,0,0.185955137,18.70000076,0.95210135,12.39999962,100.6169968,0,0.360000014,1,213,,15,0.167977631,20.20000076,0.949810565,12.10000038,100.5144119,0,0.310000002,0.899999976,47,,30
2016-06-29 03:00:00,0.129014403,16.39999962,0.960798681,12.69999981,100.5144119,0,0.280000001,0.699999988,280,,-70,0.065198295,16.70000076,0.959677637,12.5,100.5876923,0,0.219999999,0.400000006,144,,-35,0.127251178,17.70000076,0.965374827,12.30000019,100.5437241,0,0.400000006,1.100000024,321,,0,0.185563132,18.39999962,0.979365766,12.30000019,100.5730362,0,0.419999987,1,319,,15,0.167977631,19.70000076,0.97601366,11.80000019,100.4704437,0,0.219999999,0.800000012,17,,30
2016-06-29 04:00:00,0.129014403,16.29999924,0.975198328,12.89999962,100.4704437,0,0.180000007,0.5,302,,-70,0.064705901,16.60000038,0.974427044,12.69999981,100.529068,0,0.25999999,0.5,131,,-35,0.127251178,17.60000038,0.981241167,12.69999981,100.4997559,0,0.360000014,1.100000024,46,,0,0.185170799,18.20000076,0.99486953,12.69999981,100.4997559,0,0.379999995,1,28,,15,0.167570204,19.39999962,0.986849546,12.39999962,100.3971634,0,0.310000002,0.800000012,28,,30
2016-06-29 05:00:00,0.129014403,16.20000076,0.975198328,12.89999962,100.4118195,0,0.209999993,0.5,286,,-70,0.064705901,16.5,0.968063891,12.80000019,100.4704437,0,0.25,0.400000006,134,,-35,0.127251178,17.5,0.974833608,12.80000019,100.4411316,0,0.270000011,1.100000024,18,,0,0.185170799,18,0.981923878,12.89999962,100.4411316,0,0.349999994,1.200000048,9,,15,0.167570204,19.10000038,0.974427044,12.69999981,100.3385468,0,0.280000001,1,22,,30
2016-06-29 06:00:00,0.128574133,16.20000076,0.982802868,13.30000019,100.3092346,0,0.170000002,0.800000012,94,,-70,0.064705901,16.39999962,0.96945262,13.19999981,100.3825073,0,0.389999986,0.800000012,119,,-35,0.127251178,17.29999924,0.96945262,13.19999981,100.3532028,0,1.080000043,2.400000095,69,,0,0.185170799,17.79999924,0.982802868,13.30000019,100.3532028,3.662109375,0.769999981,1.899999976,40,,15,0.167570204,18.89999962,0.969166577,13.10000038,100.2652664,1.831054688,0.649999976,1.700000048,48,,30
2016-06-29 07:00:00,0.124151386,16.10000038,0.989475548,13.5,100.3092346,0,0.349999994,0.800000012,269,0.55,-70,0.064705901,16.29999924,0.98292464,13.39999962,100.3971634,0,0.239999995,0.5,149,0.65,-35,0.127251178,17.29999924,0.98292464,13.39999962,100.3532028,0,0.519999981,2,284,0.1,0,0.180832773,17.70000076,0.983054578,13.60000038,100.3532028,1.831054688,0.460000008,1.299999952,289,3.6,15,0.167570204,18.79999924,0.970074058,13.5,100.2652664,1.831054688,0.319999993,1,351,3,30
2016-06-29 08:00:00,0.109293669,16,1.020780206,13.89999962,100.3092346,7.32421875,0.189999998,0.899999976,223,0.25,-70,0.068144366,16.20000076,1.008177996,13.89999962,100.3825073,7.32421875,0.360000014,0.699999988,134,0.15,-35,0.127692536,17.20000076,0.995181561,14.10000038,100.3385468,5.493164063,1.389999986,3.700000048,193,0.25,0,0.176853344,17.60000038,0.988237977,14.39999962,100.3532028,42.11425781,1.230000019,3.299999952,201,1.6,15,0.167977631,18.70000076,0.982574105,14.19999981,100.2506104,42.11425781,0.889999986,2.599999905,179,1.8,30
2016-06-29 09:00:00,0.109749876,16,1.02295506,15.5,100.2799225,71.41113281,0.310000002,1.100000024,186,,-70,0.068633996,16.20000076,1.017271996,15.5,100.3532028,64.08691406,0.419999987,1.100000024,146,,-35,0.127692536,17.10000038,0.981189072,15.80000019,100.3092346,124.5117188,2.390000105,5.300000191,194,,0,0.175652832,17.60000038,0.972742677,16.20000076,100.3092346,307.6171875,2.430000067,5.099999905,201,,15,0.167977631,18.60000038,0.950362384,16.29999924,100.2212982,294.7998047,1.940000057,4.400000095,188,,30
2016-06-29 10:00:00,0.111570932,15.89999962,0.98457247,17.60000038,100.2359543,62.25585938,0.419999987,1.200000048,197,,-70,0.068633996,16.10000038,0.964682102,17.60000038,100.2945786,65.91796875,0.469999999,1.299999952,171,,-35,0.127692536,17.10000038,0.918225288,17.79999924,100.2652664,95.21484375,2.849999905,6.599999905,198,,0,0.177252814,18,0.915513635,18.10000038,100.2652664,309.4482422,3.24000001,7.099999905,208,,15,0.167977631,18.79999924,0.9049927,18.20000076,100.1919861,307.6171875,2.789999962,7,199,,30
2016-06-29 11:00:00,0.112932801,15.89999962,0.938617468,18.60000038,100.2066422,80.56640625,0.430000007,1.600000024,221,0.05,-70,0.068144366,16.10000038,0.919938505,18.60000038,100.2799225,115.3564453,0.469999999,1.299999952,194,,-35,0.127251178,17.10000038,0.885443866,18.79999924,100.2506104,113.5253906,2.329999924,7.099999905,203,,0,0.179642528,18.5,0.877109706,19.20000076,100.2506104,320.4345703,2.980000019,6.199999809,207,,15,0.167977631,19.10000038,0.873541653,19.10000038,100.17733,336.9140625,2.75,6.5,200,,30
2016-06-29 12:00:00,0.114291303,15.89999962,0.824838102,20.60000038,100.2066422,181.2744141,0.469999999,1.600000024,222,,-70,0.067163914,16.10000038,0.822551608,20.39999962,100.2799225,173.9501953,0.389999986,1.700000048,175,,-35,0.127251178,17.20000076,0.787720382,20.60000038,100.2652664,316.7724609,2.059999943,6.400000095,206,,0,0.181228831,19,0.779854417,21.10000038,100.2652664,602.4169922,2.529999971,6.400000095,204,,15,0.168384701,19.5,0.780635893,21,100.162674,615.234375,2.619999886,6.900000095,200,0.2,30
2016-06-29 13:00:00,0.115646444,16,0.818813026,20.79999924,100.2066422,53.10058594,0.389999986,1.600000024,217,0.55,-70,0.066181891,16.20000076,0.807474673,20.70000076,100.2945786,75.07324219,0.340000004,1.100000024,176,0.7,-35,0.127251178,17.29999924,0.778076053,20.79999924,100.2652664,51.26953125,1.289999962,4.900000095,216,0.15,0,0.182019949,19.79999924,0.767856658,21.10000038,100.2652664,225.2197266,1.940000057,5.199999809,208,5.2,15,0.168791428,20.10000038,0.768564224,21,100.162674,239.8681641,2,6,201,5.4,30
2016-06-29 14:00:00,0.119243778,16.10000038,0.922997534,19.79999924,100.2212982,177.6123047,0.409999996,1.299999952,185,0.05,-70,0.068633996,16.29999924,0.916976929,19.60000038,100.3092346,192.2607422,0.370000005,1,171,0.05,-35,0.127692536,17.5,0.892664313,19.79999924,100.2652664,69.58007813,1.299999952,3.900000095,212,,0,0.179245099,20.20000076,0.85954994,20.79999924,100.2652664,834.9609375,1.460000038,4.099999905,211,0.2,15,0.16960384,20.5,0.847328901,20.79999924,100.17733,838.6230469,1.519999981,4,198,,30
2016-06-29 15:00:00,0.121480055,16.10000038,0.708595812,22.5,100.2066422,206.9091797,0.449999988,1.700000048,242,0.05,-70,0.068633996,16.39999962,0.729816079,22.10000038,100.2799225,228.8818359,0.289999992,1.399999976,192,,-35,0.127692536,17.60000038,0.702949166,22.20000076,100.2652664,73.2421875,0.939999998,4.800000191,232,,0,0.180039614,20.60000038,0.653155982,23.5,100.2506104,747.0703125,1.289999962,5.800000191,201,,15,0.16960384,21,0.639332533,23.5,100.17733,763.5498047,1.590000033,7.5,194,0.2,30
2016-06-29 16:00:00,0.12326242,16.29999924,0.614308476,23.79999924,100.2066422,97.04589844,0.419999987,2.099999905,247,,-70,0.068144366,16.60000038,0.636247158,23.39999962,100.2799225,102.5390625,0.25999999,1.200000048,180,,-35,0.127251178,17.79999924,0.598002791,23.39999962,100.2506104,51.26953125,0.889999986,4.199999809,225,,0,0.181624562,20.89999962,0.553242922,24.5,100.2506104,509.0332031,1.25999999,5.099999905,201,,15,0.17041485,21.70000076,0.53382051,24.79999924,100.162674,739.7460938,1.600000024,5.599999905,194,,30
2016-06-29 17:00:00,0.124151386,16.39999962,0.700691402,21.89999962,100.2359543,38.45214844,0.469999999,1.299999952,198,,-70,0.066181891,16.70000076,0.709303558,21.70000076,100.3092346,56.76269531,0.379999995,1.299999952,164,,-35,0.127251178,17.89999962,0.694620728,21.5,100.2799225,27.46582031,1.779999971,6.5,203,,0,0.182019949,21,0.685825527,21.79999924,100.2652664,106.2011719,1.970000029,6.400000095,202,,15,0.17122449,22.20000076,0.654340982,22.20000076,100.1919861,195.9228516,1.730000019,6.900000095,191,,30
2016-06-29 18:00:00,0.124151386,16.5,0.813797772,21.29999924,100.2212982,69.58007813,0.289999992,1,190,0.05,-70,0.065690286,16.79999924,0.794955969,21.20000076,100.2945786,84.22851563,0.330000013,1,148,,-35,0.127251178,17.89999962,0.721937239,21.5,100.2799225,40.28320313,1.279999971,5.599999905,201,,0,0.182019949,20.89999962,0.708814085,21.79999924,100.2652664,104.3701172,1.700000048,5,203,,15,0.17122449,22.29999924,0.666524053,22.89999962,100.1919861,481.5673828,1.470000029,6.099999905,194,,30
2016-06-29 19:00:00,0.124595322,16.5,0.632145524,21.89999962,100.2212982,27.46582031,0.389999986,1.5,259,,-70,0.065690286,17,0.666899502,21.70000076,100.3092346,40.28320313,0.209999993,1.100000024,188,,-35,0.126809448,17.89999962,0.605488777,21.89999962,100.2945786,20.14160156,0.479999989,2.799999952,256,,0,0.182019949,20.70000076,0.56146729,22.39999962,100.2799225,29.296875,0.790000021,4.5,188,,15,0.17122449,22.20000076,0.509341776,23,100.1919861,95.21484375,0.949999988,4.599999905,171,,30
2016-06-29 20:00:00,0.124151386,16.60000038,0.560443938,21.20000076,100.2945786,9.155273438,0.449999988,1.100000024,277,,-70,0.065198295,17,0.62245512,20.5,100.3678589,10.98632813,0.150000006,0.800000012,227,,-35,0.126809448,18,0.590686023,20.79999924,100.3385468,7.32421875,0.419999987,1.5,284,,0,0.182019949,20.5,0.579441071,21,100.3385468,20.14160156,0.389999986,3,351,,15,0.17122449,21.79999924,0.522916734,21.5,100.2359543,25.63476563,0.550000012,4.099999905,63,,30
2016-06-29 21:00:00,0.124151386,16.60000038,0.653729975,19.60000038,100.3385468,1.831054688,0.300000012,1,258,,-70,0.064705901,17.10000038,0.724179626,19.10000038,100.3971634,1.831054688,0.180000007,0.400000006,169,,-35,0.126809448,18,0.639696598,19.39999962,100.3678589,1.831054688,0.239999995,1.100000024,277,,0,0.182019949,20.20000076,0.626901269,19.5,100.3825073,9.155273438,0.389999986,1.700000048,255,,15,0.170819849,21.39999962,0.571998477,19.79999924,100.2799225,12.81738281,0.400000006,1.700000048,62,,30
2016-06-29 22:00:00,0.124151386,16.70000076,0.609991014,18.39999962,100.3825073,0,0.389999986,1.100000024,252,,-70,0.064705901,17.10000038,0.678247452,17.89999962,100.4411316,0,0.230000004,0.600000024,181,,-35,0.12636736,18,0.644900739,18,100.4264755,0,0.300000012,1.200000048,259,,0,0.182019949,19.89999962,0.662889898,17.79999924,100.4264755,1.831054688,0.300000012,2.400000095,220,,15,0.170009524,20.89999962,0.625505209,18,100.3238907,1.831054688,0.319999993,1.5,188,,30
2016-06-29 23:00:00,0.124151386,16.70000076,0.745170474,16.29999924,100.4264755,0,0.409999996,1,233,,-70,0.064213112,17.10000038,0.781585515,16,100.4997559,0,0.270000011,0.400000006,181,,-35,0.12636736,17.89999962,0.748560786,16,100.4557877,0,0.419999987,1.100000024,242,,0,0.182019949,19.5,0.785501897,15.69999981,100.4704437,0,0.50999999,1.200000048,212,,15,0.16960384,20.5,0.767216265,15.5,100.3825073,0,0.529999971,1.100000024,196,,30
2016-06-30 00:00:00,0.123707086,16.60000038,0.81633395,15.10000038,100.4411316,0,0.409999996,0.899999976,246,,-70,0.064213112,17.10000038,0.798841059,15.10000038,100.5144119,0,0.280000001,0.5,195,,-35,0.12636736,17.89999962,0.76475364,15.19999981,100.4850998,0,0.519999981,0.899999976,260,,0,0.182019949,19.20000076,0.781348169,15.10000038,100.4997559,0,0.400000006,1,243,,15,0.16960384,20.10000038,0.779659033,14.89999962,100.3825073,0,0.409999996,1.100000024,234,,30
2016-06-30 01:00:00,0.123707086,16.60000038,0.835016668,14.30000019,100.4411316,0,0.460000008,0.699999988,259,0.05,-70,0.064213112,17,0.822737038,14.30000019,100.5144119,0,0.280000001,0.5,210,,-35,0.12636736,17.79999924,0.799130678,14.39999962,100.4850998,0,0.50999999,0.899999976,270,,0,0.182019949,18.89999962,0.776825309,14.60000038,100.4850998,0,0.389999986,0.600000024,270,,15,0.16960384,19.70000076,0.810457349,14.30000019,100.3825073,0,0.280000001,0.800000012,249,,30
2016-06-30 02:00:00,0.123707086,16.5,0.867401123,13.60000038,100.4264755,0,0.340000004,0.800000012,249,,-70,0.064213112,16.89999962,0.860132337,13.5,100.4997559,0,0.330000013,0.5,204,,-35,0.1259249,17.70000076,0.847198009,13.5,100.4704437,0,0.409999996,0.800000012,261,,0,0.182019949,18.60000038,0.848125517,13.60000038,100.4850998,0,0.379999995,0.800000012,240,,15,0.16960384,19.39999962,0.877123773,13.19999981,100.3678589,0,0.330000013,0.800000012,211,,30
2016-06-30 03:00:00,0.12326242,16.39999962,0.908705294,13,100.4411316,0,0.409999996,1,258,,-70,0.064213112,16.79999924,0.888660312,13,100.4997559,0,0.270000011,0.400000006,212,,-35,0.1259249,17.60000038,0.881978691,13,100.4704437,0,0.49000001,1,272,,0,0.182019949,18.29999924,0.882870972,13.10000038,100.4704437,0,0.409999996,0.800000012,249,,15,0.16960384,19,0.913099468,12.69999981,100.3678589,0,0.280000001,0.800000012,219,,30
2016-06-30 04:00:00,0.12326242,16.39999962,0.926727772,12.69999981,100.4118195,0,0.430000007,0.800000012,262,,-70,0.064213112,16.70000076,0.913099468,12.69999981,100.4850998,0,0.209999993,0.400000006,182,,-35,0.1259249,17.5,0.913099468,12.69999981,100.4557877,0,0.469999999,0.800000012,278,,0,0.182019949,18.10000038,0.907136798,12.80000019,100.4557877,0,0.389999986,0.800000012,269,,15,0.16960384,18.70000076,0.918252707,12.5,100.3532028,0,0.219999999,0.699999988,259,,30
2016-06-30 05:00:00,0.12326242,16.29999924,0.949810565,12.10000038,100.4118195,0,0.430000007,0.800000012,261,,-70,0.063719928,16.60000038,0.935634315,12.10000038,100.4850998,0,0.219999999,0.400000006,160,,-35,0.1259249,17.39999962,0.928546131,12.10000038,100.4411316,0,0.469999999,1,277,,0,0.181624562,17.79999924,0.929495633,12.19999981,100.4557877,1.831054688,0.360000014,0.800000012,261,,15,0.16960384,18.39999962,0.939865053,11.80000019,100.3678589,0,0.170000002,0.5,279,,30
2016-06-30 06:00:00,0.122817382,16.20000076,0.949810565,12.10000038,100.4118195,0,0.379999995,0.600000024,265,,-70,0.063719928,16.5,0.935634315,12.10000038,100.4997559,1.831054688,0.209999993,0.300000012,151,,-35,0.1259249,17.29999924,0.922454,12.19999981,100.4557877,9.155273438,0.379999995,0.699999988,283,,0,0.182019949,17.60000038,0.917353094,12.39999962,100.4557877,25.63476563,0.289999992,0.5,280,,15,0.16960384,18.20000076,0.929495633,12.19999981,100.3532028,23.80371094,0.150000006,0.400000006,344,,30
2016-06-30 07:00:00,0.122817382,16.10000038,0.947170317,12.69999981,100.4264755,12.81738281,0.209999993,0.5,261,,-70,0.063719928,16.39999962,0.933541954,12.69999981,100.5144119,27.46582031,0.189999998,0.300000012,153,,-35,0.1259249,17.20000076,0.853436172,14.30000019,100.4704437,139.1601563,0.319999993,0.699999988,293,,0,0.182019949,17.39999962,0.844146609,14.80000019,100.4850998,177.6123047,0.25,1,288,,15,0.16960384,17.89999962,0.840070248,15.19999981,100.3825073,150.1464844,0.129999995,0.899999976,178,,30
2016-06-30 08:00:00,0.122817382,16.10000038,0.945533633,14.30000019,100.4264755,29.296875,0.100000001,0.400000006,238,,-70,0.063719928,16.29999924,0.909440041,14.69999981,100.4997559,43.9453125,0.209999993,0.5,173,,-35,0.1259249,17.10000038,0.740258098,17.39999962,100.4850998,139.1601563,0.879999995,2,69,,0,0.182019949,17.5,0.736801207,17.89999962,100.4704437,289.3066406,0.560000002,1.5,40,,15,0.16960384,17.79999924,0.75108242,17.70000076,100.3825073,261.8408203,0.469999999,1.200000048,37,,30
2016-06-30 09:00:00,0.12326242,16,0.800495744,17.70000076,100.4118195,60.42480469,0.129999995,0.699999988,105,0.05,-70,0.064213112,16.20000076,0.775837064,17.89999962,100.4850998,67.74902344,0.349999994,0.899999976,128,,-35,0.125482067,17.10000038,0.700161755,18.5,100.4557877,109.8632813,1.110000014,2.200000048,94,,0,0.182019949,17.79999924,0.688390911,19.29999924,100.4557877,296.6308594,0.629999995,1.799999952,81,,15,0.16960384,17.89999962,0.692691803,19.20000076,100.3825073,298.4619141,0.560000002,2,78,,30
2016-06-30 10:00:00,0.12326242,15.89999962,0.693350852,20,100.4118195,113.5253906,0.230000004,0.899999976,124,,-70,0.064213112,16.20000076,0.671951115,20,100.4850998,117.1875,0.460000008,1.100000024,129,,-35,0.125038877,17.10000038,0.606256008,20.60000038,100.4557877,170.2880859,1.399999976,3.700000048,150,,0,0.182414994,18.29999924,0.597061634,21.5,100.4704437,470.5810547,0.99000001,3.200000048,154,,15,0.16960384,18.29999924,0.604422629,21.29999924,100.3678589,461.4257813,0.899999976,2.700000048,136,,30
2016-06-30 11:00:00,0.12326242,15.89999962,0.628071606,22.29999924,100.3971634,137.3291016,0.330000013,1.100000024,161,0.2,-70,0.064213112,16.20000076,0.602122843,22.5,100.4704437,327.7587891,0.430000007,1.200000048,141,,-35,0.124595322,17.29999924,0.56146729,22.39999962,100.4557877,375.3662109,2.230000019,4.400000095,190,,0,0.18320407,19,0.55937463,23.10000038,100.4557877,688.4765625,2.119999886,3.900000095,199,,15,0.16960384,19,0.570079029,23.20000076,100.3678589,679.3212891,1.639999986,3.900000095,187,,30
2016-06-30 12:00:00,0.123707086,16,0.587674022,23.20000076,100.4118195,128.1738281,0.409999996,1.600000024,219,0.25,-70,0.064213112,16.20000076,0.584155023,23.20000076,100.4704437,137.3291016,0.319999993,1.200000048,178,,-35,0.124151386,17.5,0.535656989,23.5,100.4557877,162.9638672,1.25999999,5.099999905,210,,0,0.183598086,19.89999962,0.523131669,24,100.4411316,479.7363281,1.669999957,6.900000095,205,,15,0.170009524,19.79999924,0.519778252,24,100.3678589,507.2021484,1.779999971,5.699999809,199,,30
2016-06-30 13:00:00,0.123707086,16,0.583762765,23.79999924,100.4118195,157.4707031,0.389999986,1.5,218,0.25,-70,0.064213112,16.29999924,0.577094138,23.60000038,100.4704437,155.6396484,0.319999993,1.100000024,175,,-35,0.124151386,17.70000076,0.522911131,23.89999962,100.4557877,111.6943359,1.440000057,5.5,208,,0,0.184385121,20.60000038,0.510936141,24.5,100.4557877,574.9511719,1.769999981,5.5,205,,15,0.17041485,20.39999962,0.510730147,24.39999962,100.3678589,602.4169922,1.769999981,6.300000191,200,,30
2016-06-30 14:00:00,0.123707086,16.10000038,0.573671341,23.5,100.4118195,120.8496094,0.449999988,1.5,226,0.25,-70,0.064213112,16.5,0.57366544,23.39999962,100.4704437,128.1738281,0.330000013,1.100000024,188,,-35,0.124151386,17.89999962,0.508754134,23.70000076,100.4557877,89.72167969,1.320000052,5.800000191,214,,0,0.184778139,21.10000038,0.494037718,24.29999924,100.4557877,468.75,1.799999952,6.199999809,208,,15,0.17041485,20.89999962,0.490381926,24.20000076,100.3678589,507.2021484,2.119999886,7.599999905,202,,30
2016-06-30 15:00:00,0.123707086,16.20000076,0.570188701,23.39999962,100.4118195,113.5253906,0.469999999,1.5,187,0.1,-70,0.064213112,16.60000038,0.559521973,23.20000076,100.4850998,111.6943359,0.439999998,1.299999952,165,,-35,0.124151386,18,0.493699968,23.39999962,100.4557877,91.55273438,2.789999962,6.800000191,196,,0,0.184778139,21.29999924,0.498510778,23.70000076,100.4411316,419.3115234,3.230000019,6.400000095,207,,15,0.170009524,21.20000076,0.502307534,23.79999924,100.3678589,468.75,3.039999962,6.199999809,199,,30
2016-06-30 16:00:00,0.124151386,16.29999924,0.608788073,23.20000076,100.4118195,89.72167969,0.430000007,1.600000024,201,,-70,0.064213112,16.79999924,0.594825745,23,100.4850998,102.5390625,0.379999995,1,169,,-35,0.124151386,18.10000038,0.528169513,23.29999924,100.4557877,76.90429688,2.339999914,8.199999809,198,,0,0.185170799,21.39999962,0.529240906,23.70000076,100.4411316,316.7724609,2.730000019,6.900000095,207,,15,0.170009524,21.39999962,0.529459238,23.79999924,100.3678589,487.0605469,2.559999943,5.699999809,198,,30
2016-06-30 17:00:00,0.124151386,16.39999962,0.622053266,23.5,100.4118195,62.25585938,0.349999994,1.200000048,205,,-70,0.064705901,16.89999962,0.615614831,23.29999924,100.4704437,80.56640625,0.300000012,0.899999976,159,,-35,0.123707086,18.20000076,0.546024561,23.5,100.4557877,53.10058594,1.580000043,5,202,,0,0.185170799,21.39999962,0.54303515,23.79999924,100.4411316,183.1054688,1.980000019,5.599999905,207,,15,0.16960384,21.5,0.536666453,24.10000038,100.3678589,395.5078125,1.850000024,6.599999905,199,,30
2016-06-30 18:00:00,0.124151386,16.5,0.648253202,23,100.3971634,25.63476563,0.340000004,1.200000048,208,,-70,0.064705901,17,0.626882195,23,100.4704437,27.46582031,0.319999993,1.399999976,158,,-35,0.123707086,18.20000076,0.566645443,23.29999924,100.4411316,25.63476563,1.370000005,6.099999905,202,,0,0.185170799,21.20000076,0.563303828,23.5,100.4411316,87.890625,1.649999976,4.5,205,,15,0.16960384,21.60000038,0.560005009,23.79999924,100.3532028,206.9091797,1.600000024,4.400000095,199,,30
2016-06-30 19:00:00,0.124595322,16.60000038,0.712115705,21.89999962,100.4118195,16.47949219,0.209999993,0.699999988,249,,-70,0.064705901,17.10000038,0.708814085,21.79999924,100.4997559,18.31054688,0.180000007,0.5,155,,-35,0.12326242,18.20000076,0.66210115,22.10000038,100.4850998,16.47949219,0.409999996,2.599999905,249,,0,0.184778139,21.10000038,0.657507718,22.39999962,100.4704437,75.07324219,0.550000012,3.900000095,211,,15,0.169197798,21.60000038,0.631494701,22.5,100.3532028,86.05957031,0.589999974,3.400000095,190,,30
2016-06-30 20:00:00,0.124595322,16.60000038,0.708307624,21.89999962,100.4264755,12.81738281,0.25999999,0.699999988,194,,-70,0.064705901,17.20000076,0.685458958,21.89999962,100.4997559,14.6484375,0.319999993,0.800000012,159,,-35,0.12326242,18.20000076,0.639384627,22.20000076,100.4850998,14.6484375,1.549999952,4.900000095,200,,0,0.184778139,20.89999962,0.646653593,22.29999924,100.4850998,58.59375,1.889999986,4.199999809,213,,15,0.169197798,21.39999962,0.658339202,22.10000038,100.3825073,73.2421875,1.5,3.5,198,,30
2016-06-30 21:00:00,0.124595322,16.70000076,0.745991826,20.70000076,100.4704437,0,0.330000013,1,225,,-70,0.064213112,17.29999924,0.755745411,20.39999962,100.529068,0,0.25999999,0.5,174,,-35,0.122817382,18.20000076,0.734105885,20.60000038,100.5144119,0,0.50999999,1.5,240,,0,0.184778139,20.79999924,0.746478498,20.60000038,100.5144119,9.155273438,0.810000002,1.899999976,218,,15,0.168384701,21.29999924,0.764628589,20.29999924,100.4264755,10.98632813,0.560000002,1.200000048,199,,30
2016-06-30 22:00:00,0.124595322,16.70000076,0.801664531,19.79999924,100.5144119,0,0.300000012,0.600000024,227,,-70,0.064213112,17.29999924,0.802903235,19.60000038,100.5876923,0,0.270000011,0.5,172,,-35,0.122817382,18.20000076,0.780492127,19.70000076,100.5730362,0,0.419999987,0.899999976,260,,0,0.184385121,20.5,0.779997945,19.79999924,100.5730362,0,0.430000007,1.100000024,226,,15,0.167977631,21,0.78974086,19.60000038,100.4704437,1.831054688,0.340000004,0.800000012,222,,30
2016-06-30 23:00:00,0.124595322,16.70000076,0.877910852,18.60000038,100.5437241,0,0.280000001,0.600000024,224,,-70,0.064213112,17.29999924,0.879521906,18.39999962,100.6169968,0,0.25999999,0.400000006,161,,-35,0.122817382,18.20000076,0.876262784,18.20000076,100.6023483,0,0.560000002,1.5,223,,0,0.183991775,20.29999924,0.896239638,18.10000038,100.5876923,0,0.540000021,1.100000024,206,,15,0.167977631,20.70000076,0.892944515,17.89999962,100.4997559,0,0.419999987,0.899999976,187,,30
2016-07-01 00:00:00,0.124595322,16.70000076,0.890093267,17.60000038,100.5583801,0,0.379999995,0.800000012,251,,-70,0.064213112,17.20000076,0.885719836,17.5,100.6463089,0,0.25999999,0.5,195,,-35,0.122817382,18.10000038,0.880715787,17.5,100.6316528,0,0.660000026,1.299999952,265,,0,0.183598086,20,0.880148113,17.60000038,100.6023483,0,0.569999993,1.200000048,259,,15,0.167570204,20.5,0.891914785,17.29999924,100.5144119,0,0.479999989,1.299999952,235,,30
2016-07-01 01:00:00,0.124595322,16.70000076,0.930388689,16.89999962,100.5583801,0,0.370000005,0.699999988,250,,-70,0.064213112,17.20000076,0.914795578,16.89999962,100.6463089,0,0.310000002,0.600000024,202,,-35,0.122817382,18.10000038,0.909014225,17,100.6169968,0,0.560000002,1.399999976,266,,0,0.183598086,19.70000076,0.896982491,17.29999924,100.6169968,0,0.600000024,1.799999952,253,,15,0.167570204,20.20000076,0.897574127,17.20000076,100.5144119,0,0.629999995,1.799999952,233,,30
2016-07-01 02:00:00,0.125038877,16.70000076,0.958877027,16.60000038,100.529068,0,0.340000004,0.699999988,243,,-70,0.064213112,17.10000038,0.942983985,16.60000038,100.6316528,0,0.330000013,0.699999988,212,,-35,0.122817382,18,0.937010705,16.70000076,100.6023483,0,0.460000008,1.399999976,258,,0,0.18320407,19.39999962,0.935586393,16.89999962,100.6023483,0,0.589999974,1.899999976,239,,15,0.167162448,19.89999962,0.925848961,16.79999924,100.4997559,0,0.639999986,2.900000095,217,,30
2016-07-01 03:00:00,0.124595322,16.60000038,0.969472349,16.60000038,100.529068,0,0.310000002,0.699999988,231,,-70,0.064213112,17.10000038,0.959663033,16.5,100.6316528,0,0.379999995,0.800000012,208,,-35,0.122817382,17.89999962,0.952803016,16.70000076,100.5876923,0,0.5,1.799999952,243,,0,0.18320407,19.20000076,0.956377208,16.89999962,100.6023483,0,0.779999971,2.5,228,,15,0.167162448,19.60000038,0.947538912,16.70000076,100.4850998,0,0.889999986,2.599999905,212,,30
2016-07-01 04:00:00,0.125038877,16.60000038,0.98904562,16.20000076,100.529068,0,0.270000011,0.899999976,230,,-70,0.064213112,17,0.978968024,16.10000038,100.5876923,0,0.370000005,0.800000012,197,,-35,0.122817382,17.89999962,0.977361321,16.29999924,100.5583801,0,0.560000002,2.5,239,,0,0.18320407,19,0.98098886,16.5,100.5730362,0,0.860000014,2.700000048,222,,15,0.167162448,19.39999962,0.965790331,16.39999962,100.4704437,0,0.939999998,2.700000048,210,,30
2016-07-01 05:00:00,0.125038877,16.5,1.009063721,15.80000019,100.529068,0,0.300000012,0.800000012,234,,-70,0.064213112,16.89999962,0.993098795,15.69999981,100.5876923,0,0.289999992,0.699999988,176,,-35,0.122817382,17.79999924,0.992338896,15.80000019,100.5583801,0,0.479999989,1.899999976,254,,0,0.182809696,18.79999924,0.989906192,16.10000038,100.5730362,0,0.660000026,2.099999905,229,,15,0.167162448,19.20000076,0.974935055,15.89999962,100.4704437,0,0.769999981,2.700000048,213,,30
2016-07-01 06:00:00,0.125038877,16.5,1.005905747,15.5,100.5583801,1.831054688,0.330000013,1,227,,-70,0.064213112,16.79999924,0.995219707,15.39999962,100.6316528,3.662109375,0.330000013,0.800000012,177,,-35,0.122817382,17.70000076,0.968029857,16.10000038,100.5876923,31.12792969,0.649999976,2.700000048,246,,0,0.182809696,18.60000038,0.977361321,16.29999924,100.6023483,49.43847656,0.959999979,3.099999905,222,,15,0.166754335,19,0.961874068,16.20000076,100.4997559,40.28320313,1.049999952,2.900000095,210,,30
2016-07-01 07:00:00,0.125038877,16.5,1.002632022,15.89999962,100.5730362,7.32421875,0.349999994,1.100000024,229,,-70,0.064213112,16.79999924,0.979733944,16,100.6316528,25.63476563,0.389999986,0.899999976,194,,-35,0.122817382,17.60000038,0.909983635,17.60000038,100.6169968,161.1328125,0.800000012,3.099999905,243,,0,0.183598086,18.5,0.923135579,17.79999924,100.6023483,184.9365234,1.159999967,3.200000048,218,,15,0.166754335,18.89999962,0.925752401,17.5,100.5144119,151.9775391,1.49000001,3.200000048,205,,30
2016-07-01 08:00:00,0.125038877,16.39999962,0.965784907,17.5,100.5730362,20.14160156,0.340000004,0.899999976,224,,-70,0.064213112,16.70000076,0.931980312,17.89999962,100.660965,42.11425781,0.389999986,0.899999976,204,,-35,0.122371979,17.60000038,0.826029122,20,100.6316528,184.9365234,1.340000033,3.900000095,217,,0,0.183598086,18.60000038,0.832778692,20.20000076,100.6169968,342.4072266,1.75,3.799999952,206,,15,0.166754335,18.79999924,0.839775264,19.89999962,100.5437241,294.7998047,1.639999986,3.900000095,196,,30
2016-07-01 09:00:00,0.125482067,16.39999962,0.82518518,20.10000038,100.5876923,62.25585938,0.379999995,1.299999952,225,,-70,0.064213112,16.70000076,0.815043628,20.29999924,100.660965,86.05957031,0.289999992,1.299999952,188,,-35,0.121926203,17.60000038,0.715354204,22,100.6316528,177.6123047,1.429999948,4.699999809,215,,0,0.183991775,19.10000038,0.70983243,22.29999924,100.6316528,483.3984375,2.019999981,5.599999905,208,,15,0.166754335,18.79999924,0.715354204,22,100.5437241,441.2841797,2.039999962,5.699999809,200,,30
2016-07-01 10:00:00,0.125482067,16.39999962,0.720981598,22.29999924,100.5730362,170.2880859,0.370000005,1.5,224,,-70,0.064213112,16.60000038,0.714166462,22.20000076,100.6463089,117.1875,0.349999994,1.600000024,178,,-35,0.121480055,17.79999924,0.647497177,23.20000076,100.6316528,227.0507813,1.75,5.699999809,206,,0,0.184778139,19.79999924,0.642360747,23.60000038,100.6169968,609.7412109,2.329999924,7.5,206,,15,0.166754335,19.10000038,0.650154173,23.39999962,100.529068,580.4443359,2.269999981,6.300000191,197,,30
2016-07-01 11:00:00,0.125482067,16.39999962,0.638503492,23.70000076,100.5730362,151.9775391,0.49000001,1.799999952,231,,-70,0.064213112,16.60000038,0.620380461,24,100.6316528,432.1289063,0.360000014,1.299999952,190,,-35,0.121033542,18.10000038,0.589783669,24.20000076,100.6169968,481.5673828,1.529999971,5.800000191,217,,0,0.184778139,20.5,0.578571916,24.79999924,100.6169968,737.9150391,2.079999924,7.300000191,207,,15,0.166754335,19.79999924,0.589040995,24.5,100.529068,715.9423828,2.25999999,6.400000095,201,,30
2016-07-01 12:00:00,0.1259249,16.39999962,0.590660691,25,100.5876923,278.3203125,0.479999989,2.400000095,207,,-70,0.064705901,16.70000076,0.577731431,25.10000038,100.660965,225.2197266,0.419999987,1.5,167,,-35,0.121033542,18.39999962,0.55606389,24.89999962,100.6463089,459.5947266,2.380000114,6.5,202,,0,0.185955137,21.5,0.552277744,25.29999924,100.6316528,725.0976563,2.630000114,7.5,206,,15,0.167570204,20.70000076,0.558483064,25.29999924,100.5583801,732.421875,2.630000114,7.699999809,199,,30
2016-07-01 13:00:00,0.1259249,16.5,0.563549936,25.70000076,100.5876923,199.5849609,0.419999987,1.700000048,194,,-70,0.064705901,16.79999924,0.560807586,25.60000038,100.660965,205.078125,0.400000006,2.200000048,163,,-35,0.121033542,18.70000076,0.533582032,25.39999962,100.6463089,104.3701172,2.160000086,7.099999905,200,,0,0.186346784,22.10000038,0.529962659,25.89999962,100.6316528,748.9013672,2.589999914,6.900000095,207,,15,0.167570204,21.70000076,0.533111453,25.79999924,100.5437241,770.8740234,2.660000086,6.699999809,200,,30
2016-07-01 14:00:00,0.1259249,16.60000038,0.580871284,25.10000038,100.5730362,142.8222656,0.389999986,1.700000048,205,,-70,0.064705901,17,0.581184804,25,100.6316528,119.0185547,0.310000002,1.200000048,168,,-35,0.121033542,19,0.543089151,25.20000076,100.6316528,76.90429688,1.450000048,5.5,207,,0,0.186346784,22.5,0.533111453,25.79999924,100.6169968,531.0058594,1.850000024,5.900000095,203,,15,0.167570204,22.60000038,0.533251524,25.70000076,100.529068,573.1201172,1.99000001,6.400000095,197,,30
2016-07-01 15:00:00,0.1259249,16.70000076,0.555938959,26.20000076,100.5437241,210.5712891,0.430000007,1.799999952,160,,-70,0.065198295,17.20000076,0.550921619,25.89999962,100.6169968,151.9775391,0.460000008,1.799999952,154,,-35,0.121033542,19.10000038,0.511997819,25.89999962,100.6023483,93.38378906,2.5,6.5,198,,0,0.186346784,22.70000076,0.502834558,26.5,100.5876923,604.2480469,2.869999886,6.300000191,205,,15,0.167570204,23.10000038,0.505625844,26.60000038,100.4997559,648.1933594,2.640000105,7.300000191,199,,30
2016-07-01 16:00:00,0.1259249,16.79999924,0.549412966,26.39999962,100.4997559,87.890625,0.419999987,1.700000048,162,,-70,0.065198295,17.39999962,0.532407165,26.20000076,100.5730362,102.5390625,0.460000008,1.600000024,156,,-35,0.121033542,19.10000038,0.49418202,26.29999924,100.5730362,73.2421875,2.130000114,6.800000191,199,,0,0.186346784,22.70000076,0.482643992,27,100.5583801,422.9736328,2.349999905,5.199999809,207,,15,0.167162448,23.60000038,0.479737967,27.29999924,100.4704437,697.6318359,2.420000076,6.800000191,197,,30
2016-07-01 17:00:00,0.12636736,16.89999962,0.576988161,26.10000038,100.4997559,71.41113281,0.300000012,1.399999976,186,,-70,0.065690286,17.5,0.576988161,26.10000038,100.5583801,117.1875,0.300000012,1.600000024,159,,-35,0.120586656,19.20000076,0.514758289,26.20000076,100.5583801,49.43847656,1.620000005,6,202,,0,0.186346784,22.5,0.508614302,26.5,100.5437241,179.4433594,1.74000001,5.400000095,207,,15,0.167162448,24.10000038,0.49395588,26.89999962,100.4557877,336.9140625,1.779999971,6.800000191,196,,30
2016-07-01 18:00:00,0.12636736,17,0.646808028,25.10000038,100.4850998,56.76269531,0.239999995,1,198,,-70,0.065690286,17.60000038,0.628564,25,100.5583801,64.08691406,0.25,1,147,,-35,0.120139405,19.20000076,0.580201864,25.29999924,100.5583801,40.28320313,0.579999983,3.700000048,229,,0,0.186346784,22.39999962,0.545159221,25.79999924,100.529068,135.4980469,0.879999995,4.5,197,,15,0.166754335,24.29999924,0.520499408,26.29999924,100.4411316,305.7861328,0.819999993,4,189,,30
2016-07-01 19:00:00,0.12636736,17.10000038,0.634052217,24.60000038,100.4704437,25.63476563,0.280000001,1.100000024,189,,-70,0.065690286,17.70000076,0.614642441,24.60000038,100.5437241,32.95898438,0.289999992,0.899999976,146,,-35,0.119691774,19.20000076,0.546210349,25.20000076,100.529068,21.97265625,1.059999943,3.700000048,203,,0,0.185955137,22.20000076,0.542834878,25.39999962,100.5144119,73.2421875,1.289999962,3,208,,15,0.165937051,24.29999924,0.539619088,25.5,100.4411316,135.4980469,1.210000038,3.400000095,195,,30
2016-07-01 20:00:00,0.12636736,17.20000076,0.663974822,24,100.4704437,12.81738281,0.239999995,0.699999988,189,,-70,0.065690286,17.79999924,0.633794129,24,100.529068,14.6484375,0.289999992,0.5,141,,-35,0.119691774,19.20000076,0.543281496,25,100.529068,14.6484375,1.179999948,3.900000095,200,,0,0.185170799,22,0.555915892,25,100.5144119,43.9453125,1.230000019,3.599999905,209,,15,0.165527895,24,0.578822494,24.70000076,100.4264755,60.42480469,0.939999998,4.599999905,195,,30
2016-07-01 21:00:00,0.12636736,17.20000076,0.657588542,23.29999924,100.4557877,1.831054688,0.25999999,0.600000024,202,,-70,0.065690286,17.89999962,0.651016176,23.20000076,100.529068,1.831054688,0.25999999,0.400000006,151,,-35,0.119691774,19.10000038,0.618016779,23.70000076,100.5144119,3.662109375,0.569999993,1.5,223,,0,0.184778139,21.79999924,0.657107711,23.39999962,100.5144119,14.6484375,0.680000007,1.799999952,216,,15,0.165118396,23.70000076,0.676747859,23,100.4118195,20.14160156,0.519999981,1.100000024,195,,30
2016-07-01 22:00:00,0.12636736,17.29999924,0.789193571,21.39999962,100.4850998,0,0.239999995,0.600000024,223,,-70,0.065198295,17.89999962,0.791852176,21.10000038,100.5437241,0,0.25,0.400000006,153,,-35,0.119691774,19.10000038,0.777352393,20.89999962,100.529068,0,0.400000006,1,228,,0,0.184778139,21.5,0.823446155,20.29999924,100.529068,0,0.620000005,1.299999952,194,,15,0.164298326,23.29999924,0.820931613,20.10000038,100.4411316,0,0.409999996,0.800000012,171,,30
2016-07-01 23:00:00,0.12636736,17.29999924,0.819734752,19.70000076,100.4850998,0,0.25,0.600000024,216,,-70,0.065198295,17.89999962,0.830717146,19.39999962,100.5437241,0,0.280000001,0.5,158,,-35,0.119691774,19.10000038,0.843265593,18.89999962,100.529068,0,0.579999983,1.299999952,219,,0,0.184778139,21.20000076,0.888979137,18.39999962,100.529068,0,0.670000017,1,196,,15,0.163887769,22.89999962,0.87078017,18.29999924,100.4411316,0,0.529999971,0.899999976,182,,30
2016-07-02 00:00:00,0.12636736,17.29999924,0.865344405,19,100.4411316,0,0.219999999,0.600000024,228,,-70,0.065198295,17.79999924,0.863153577,18.70000076,100.4997559,0,0.239999995,0.400000006,163,,-35,0.119691774,19,0.870064676,18.39999962,100.4850998,0,0.460000008,1.200000048,250,,0,0.184385121,20.89999962,0.902703464,17.89999962,100.4850998,0,0.419999987,1.200000048,218,,15,0.163476869,22.39999962,0.878306091,17.89999962,100.3825073,0,0.430000007,1.200000048,194,,30
2016-07-02 01:00:00,0.12636736,17.20000076,0.869898856,19,100.3971634,0,0.300000012,0.699999988,242,,-70,0.064705901,17.79999924,0.856235504,19,100.4704437,0,0.25,0.5,186,,-35,0.119691774,18.89999962,0.832129717,19.20000076,100.4411316,0,0.730000019,1.899999976,263,,0,0.183991775,20.60000038,0.779483676,19.89999962,100.4557877,0,0.870000005,2.5,237,,15,0.163065612,22,0.808505476,19.39999962,100.3532028,0,0.670000017,2.5,224,,30
2016-07-02 02:00:00,0.12636736,17.20000076,0.872434795,18.70000076,100.3678589,0,0.370000005,0.800000012,227,,-70,0.064705901,17.70000076,0.858512998,18.70000076,100.4411316,0,0.340000004,0.699999988,187,,-35,0.119691774,18.79999924,0.829516709,18.89999962,100.4118195,0,0.769999981,1.799999952,254,,0,0.183991775,20.39999962,0.800142646,19.29999924,100.4264755,0,0.949999988,2.400000095,228,,15,0.162654012,21.60000038,0.810691059,19,100.3238907,0,0.980000019,2.400000095,222,,30
2016-07-02 03:00:00,0.1259249,17.20000076,0.856505096,18.29999924,100.3532028,0,0.389999986,0.800000012,209,,-70,0.064705901,17.60000038,0.842744529,18.20000076,100.4118195,0,0.379999995,0.699999988,176,,-35,0.119691774,18.70000076,0.793544412,18.70000076,100.3971634,0,1.049999952,2.5,211,,0,0.183991775,20.10000038,0.788269997,18.89999962,100.4118195,0,1.720000029,3.099999905,210,,15,0.16224207,21.29999924,0.813321352,18.39999962,100.3092346,0,1.470000029,3.299999952,206,,30
2016-07-02 04:00:00,0.1259249,17.10000038,0.869674385,17.70000076,100.3092346,0,0.370000005,0.699999988,208,,-70,0.064213112,17.60000038,0.855285168,17.60000038,100.3825073,0,0.379999995,0.699999988,171,,-35,0.119691774,18.60000038,0.814325273,18.10000038,100.3532028,0,1.080000043,2.799999952,207,,0,0.183598086,19.89999962,0.814014614,18.20000076,100.3678589,0,1.700000048,3.200000048,210,,15,0.16224207,21,0.840026379,17.70000076,100.2799225,0,1.460000038,3.799999952,203,,30
2016-07-02 05:00:00,0.1259249,17.10000038,0.886847079,17.29999924,100.3092346,0,0.349999994,0.699999988,219,,-70,0.064213112,17.5,0.872074902,17.20000076,100.3825073,0,0.379999995,0.699999988,181,,-35,0.119243778,18.5,0.840683222,17.5,100.3532028,0,0.670000017,2.200000048,235,,0,0.183598086,19.70000076,0.835085034,17.70000076,100.3532028,1.831054688,1.059999943,2.299999952,220,,15,0.16224207,20.70000076,0.846009254,17.39999962,100.2652664,0,1.070000052,2.400000095,211,,30
2016-07-02 06:00:00,0.1259249,17,0.904925823,16.79999924,100.2799225,1.831054688,0.280000001,0.600000024,229,,-70,0.064213112,17.39999962,0.894897819,16.70000076,100.3825073,3.662109375,0.310000002,0.600000024,185,,-35,0.119243778,18.39999962,0.819460332,18,100.3238907,64.08691406,0.829999983,3.099999905,229,,0,0.183598086,19.5,0.82430923,18,100.3385468,75.07324219,1.100000024,3,215,,15,0.161829755,20.39999962,0.840367436,17.60000038,100.2506104,51.26953125,1.120000005,2.200000048,209,,30
2016-07-02 07:00:00,0.1259249,17,0.88512069,17.60000038,100.2506104,9.155273438,0.300000012,0.800000012,217,,-70,0.064213112,17.29999924,0.852873206,18.10000038,100.3238907,31.12792969,0.379999995,0.899999976,172,,-35,0.118795417,18.29999924,0.749337912,19.89999962,100.2945786,188.5986328,2.420000076,4.800000191,199,,0,0.183598086,19.29999924,0.77177155,19.70000076,100.2945786,205.078125,2.5,4.099999905,209,,15,0.161829755,20.10000038,0.785833955,19.5,100.2212982,161.1328125,1.789999962,4.099999905,200,,30
2016-07-02 08:00:00,0.1259249,16.89999962,0.824840486,19.60000038,100.2212982,23.80371094,0.330000013,1,200,,-70,0.064213112,17.29999924,0.78079772,20.39999962,100.2945786,45.77636719,0.419999987,1.100000024,167,,-35,0.118346676,18.29999924,0.690028965,21.70000076,100.2652664,201.4160156,2.980000019,5.900000095,197,,0,0.183598086,19.39999962,0.696883261,21.89999962,100.2652664,347.9003906,2.890000105,4.5,208,,15,0.161829755,20,0.704982698,21.79999924,100.162674,303.9550781,2.349999905,4.699999809,195,,30
2016-07-02 09:00:00,0.125482067,16.89999962,0.75614965,22.10000038,100.1919861,65.91796875,0.270000011,1,203,,-70,0.064213112,17.20000076,0.704305351,22.60000038,100.2652664,76.90429688,0.360000014,1.299999952,158,,-35,0.117897563,18.29999924,0.614880085,23.60000038,100.2506104,146.484375,2.329999924,5.699999809,198,,0,0.183598086,19.79999924,0.617027104,24,100.2359543,421.1425781,2.369999886,5.199999809,209,,15,0.161417112,20,0.627493382,23.89999962,100.162674,390.0146484,1.960000038,4,195,,30
2016-07-02 10:00:00,0.125482067,16.89999962,0.577731431,25.10000038,100.162674,173.9501953,0.439999998,1.600000024,165,,-70,0.064213112,17.20000076,0.558695197,25.20000076,100.2359543,115.3564453,0.50999999,1.399999976,149,,-35,0.117897563,18.39999962,0.508993864,25.60000038,100.2212982,212.4023438,3.609999895,8.5,195,,0,0.183991775,20.29999924,0.514991999,25.89999962,100.2066422,615.234375,3.420000076,6.400000095,207,,15,0.161417112,20.29999924,0.517905414,26,100.1187134,582.2753906,2.910000086,6.699999809,196,,30
2016-07-02 11:00:00,0.125482067,16.89999962,0.551962078,26.5,100.1333694,133.6669922,0.469999999,2,168,,-70,0.064705901,17.20000076,0.537227452,26.60000038,100.1919861,228.8818359,0.469999999,1.399999976,160,,-35,0.117897563,18.70000076,0.499944717,26.5,100.1919861,238.0371094,3.140000105,7.800000191,195,,0,0.184778139,21,0.499480397,27,100.17733,563.9648438,3.130000114,7,204,,15,0.161829755,21.10000038,0.502286494,27,100.1040573,571.2890625,2.950000048,6.400000095,194,,30
2016-07-02 12:00:00,0.125482067,16.89999962,0.627057672,24.70000076,100.162674,124.5117188,0.529999971,2.200000048,264,,-70,0.064705901,17.20000076,0.623842001,24.70000076,100.2359543,126.3427734,0.289999992,1.600000024,239,,-35,0.117897563,18.89999962,0.59697789,25,100.2212982,155.6396484,0.769999981,4.099999905,269,,0,0.184778139,21.70000076,0.579094827,25.60000038,100.2066422,512.6953125,0.870000005,6.5,201,,15,0.161829755,22.10000038,0.579846382,25.39999962,100.1187134,534.6679688,1.120000005,5.900000095,180,,30
2016-07-02 13:00:00,0.125038877,17,0.722551584,22.60000038,100.17733,40.28320313,0.330000013,2.5,244,0.05,-70,0.064705901,17.29999924,0.730624676,22.5,100.2506104,43.9453125,0.239999995,1.399999976,179,,-35,0.117897563,19.10000038,0.700044096,22.70000076,100.2359543,49.43847656,0.629999995,2.299999952,252,,0,0.183598086,22.10000038,0.690367401,23.10000038,100.2212982,195.9228516,0.810000002,4.900000095,203,,15,0.161829755,22.70000076,0.680857897,22.89999962,100.1187134,208.7402344,1,4.199999809,188,,30
2016-07-02 14:00:00,0.124151386,17.10000038,0.828922689,21,100.2212982,53.10058594,0.460000008,1.799999952,265,,-70,0.064705901,17.5,0.825936913,20.89999962,100.3092346,56.76269531,0.270000011,1.399999976,217,,-35,0.117897563,19.20000076,0.77741456,21.39999962,100.2799225,51.26953125,0.959999979,2.5,238,,0,0.182019949,22.29999924,0.770116925,21.79999924,100.2652664,219.7265625,0.959999979,3.700000048,213,,15,0.161829755,22.89999962,0.755562484,21.70000076,100.162674,239.8681641,0.819999993,4.699999809,153,,30
2016-07-02 15:00:00,0.122817382,17.10000038,0.897522748,18.5,100.3238907,20.14160156,0.370000005,1.299999952,275,0.2,-70,0.065198295,17.60000038,0.893707752,18.39999962,100.3971634,21.97265625,0.189999998,1.200000048,214,,-35,0.117897563,19.29999924,0.883425534,18.5,100.3678589,20.14160156,0.540000021,1.799999952,283,0.05,0,0.177651957,22.20000076,0.876220465,18.79999924,100.3678589,91.55273438,0.469999999,3.799999952,281,1.6,15,0.161829755,22.70000076,0.858512998,18.70000076,100.2799225,102.5390625,0.550000012,4.599999905,111,1.4,30
2016-07-02 16:00:00,0.116998233,17.20000076,0.958877027,16.60000038,100.4118195,14.6484375,0.289999992,1.100000024,260,0.15,-70,0.0666731,17.60000038,0.94900012,16.5,100.5144119,16.47949219,0.300000012,1.5,217,,-35,0.117897563,19.29999924,0.942983985,16.60000038,100.4704437,16.47949219,0.479999989,2.400000095,252,0.15,0,0.173242539,21.89999962,0.935586393,16.89999962,100.4557877,75.07324219,0.629999995,3.299999952,195,1.6,15,0.161829755,22.39999962,0.910156608,16.79999924,100.3678589,84.22851563,0.75999999,3.5,177,1.6,30
2016-07-02 17:00:00,0.116548009,17.20000076,0.974935055,15.89999962,100.4704437,25.63476563,0.230000004,1.399999976,223,0.05,-70,0.067163914,17.60000038,0.964464247,15.80000019,100.5437241,27.46582031,0.310000002,0.899999976,196,,-35,0.117897563,19.20000076,0.958316803,15.89999962,100.4997559,27.46582031,0.460000008,2.5,231,,0,0.172436357,21.60000038,0.934163034,16.29999924,100.5144119,115.3564453,0.709999979,4.199999809,189,0.4,15,0.161417112,22,0.918807983,16.10000038,100.4264755,126.3427734,0.819999993,2.799999952,187,0.6,30
2016-07-02 18:00:00,0.116548009,17.20000076,0.959951878,15.60000038,100.4704437,27.46582031,0.219999999,1,215,,-70,0.067163914,17.60000038,0.954758048,15.5,100.5437241,29.296875,0.300000012,0.800000012,181,,-35,0.117897563,19.10000038,0.936991513,15.69999981,100.4997559,25.63476563,0.389999986,2.200000048,228,,0,0.173242539,21.29999924,0.918807983,16.10000038,100.5144119,117.1875,0.540000021,2.299999952,197,,15,0.160590753,21.60000038,0.896931589,16.10000038,100.4118195,131.8359375,0.660000026,2.200000048,191,,30
2016-07-02 19:00:00,0.116548009,17.10000038,0.941698611,15.89999962,100.4997559,21.97265625,0.209999993,0.899999976,221,,-70,0.0666731,17.60000038,0.936589539,15.80000019,100.5583801,23.80371094,0.319999993,0.699999988,188,,-35,0.117897563,19,0.914001584,15.89999962,100.529068,20.14160156,0.430000007,1.899999976,218,,0,0.174850777,21.10000038,0.890964746,16.29999924,100.5437241,93.38378906,0.680000007,2.5,194,,15,0.160177037,21.39999962,0.874924958,16.20000076,100.4411316,100.7080078,0.720000029,3.700000048,190,,30
2016-07-02 20:00:00,0.116998233,17.10000038,0.892105699,15.69999981,100.529068,12.81738281,0.189999998,0.699999988,212,,-70,0.0666731,17.5,0.886543751,15.60000038,100.6023483,14.6484375,0.319999993,0.800000012,189,,-35,0.117897563,18.89999962,0.847390532,15.80000019,100.5730362,10.98632813,0.569999993,2.299999952,205,,0,0.176453516,20.89999962,0.82583338,16.10000038,100.5730362,58.59375,0.879999995,3.400000095,198,,15,0.160177037,21.20000076,0.814610243,16,100.4850998,65.91796875,0.959999979,3.599999905,193,,30
2016-07-02 21:00:00,0.117448084,17,0.897927225,15.5,100.5876923,7.32421875,0.300000012,0.699999988,196,,-70,0.066181891,17.39999962,0.88074261,15.30000019,100.660965,7.32421875,0.419999987,0.899999976,190,,-35,0.117897563,18.79999924,0.818782449,15.60000038,100.6169968,7.32421875,0.790000021,2.700000048,201,,0,0.177651957,20.70000076,0.808366001,15.80000019,100.6316528,31.12792969,1.169999957,3.400000095,205,,15,0.159762979,20.89999962,0.80233407,15.69999981,100.529068,38.45214844,1.210000038,3,198,,30
2016-07-02 22:00:00,0.117448084,17,0.91483444,14.30000019,100.6902771,0,0.239999995,0.699999988,214,,-70,0.066181891,17.39999962,0.914323032,14.10000038,100.7635574,0,0.319999993,0.600000024,178,,-35,0.117448084,18.70000076,0.884135306,14.30000019,100.7195892,0,0.340000004,2,225,,0,0.178050756,20.29999924,0.884135306,14.30000019,100.7195892,0,0.629999995,1.899999976,213,,15,0.159762979,20.5,0.877003729,14.10000038,100.6316528,0,0.720000029,2.200000048,201,,30
2016-07-02 23:00:00,0.117448084,16.89999962,0.956886888,13.39999962,100.7195892,0,0.300000012,0.699999988,205,,-70,0.065690286,17.29999924,0.943072975,13.19999981,100.7928696,0,0.340000004,0.600000024,156,,-35,0.116998233,18.60000038,0.91073066,13.30000019,100.7489014,0,0.5,2,206,,0,0.178449214,19.89999962,0.904811442,13.39999962,100.7635574,0,0.970000029,2.400000095,210,,15,0.159762979,20,0.903503478,13.19999981,100.660965,0,0.980000019,2.099999905,198,,30
2016-07-03 00:00:00,0.117448084,16.79999924,0.961747348,12.89999962,100.7049332,0,0.310000002,0.699999988,230,,-70,0.065690286,17.20000076,0.94775486,12.80000019,100.7782135,0,0.289999992,0.5,156,,-35,0.116998233,18.39999962,0.921394289,12.89999962,100.7489014,0,0.50999999,1.700000048,213,,0,0.178847328,19.5,0.922068596,13,100.7635574,0,0.75,2.099999905,208,,15,0.159348577,19.60000038,0.91991359,12.69999981,100.675621,0,0.709999979,2,194,,30
2016-07-03 01:00:00,0.117448084,16.70000076,0.966000617,12.39999962,100.7489014,0,0.280000001,0.699999988,201,0.05,-70,0.065690286,17.10000038,0.950620532,12.19999981,100.8221817,0,0.360000014,0.600000024,143,,-35,0.116548009,18.29999924,0.930397451,12.30000019,100.8075256,0,0.980000019,2.099999905,197,,0,0.178847328,19.10000038,0.943578899,12.19999981,100.8075256,0,1.169999957,1.899999976,206,,15,0.159348577,19.20000076,0.948048353,11.89999962,100.6902771,0,0.839999974,1.899999976,191,,30
2016-07-03 02:00:00,0.117897563,16.70000076,0.970358372,12,100.8075256,0,0.230000004,0.5,243,0.1,-70,0.065690286,17,0.97601366,11.80000019,100.8661423,0,0.25999999,0.5,147,,-35,0.116548009,18.20000076,0.954324484,11.80000019,100.8368378,0,0.189999998,0.800000012,199,,0,0.178847328,18.70000076,0.948048353,11.89999962,100.8221817,0,0.349999994,1.799999952,202,,15,0.158933818,18.79999924,0.952365041,11.60000038,100.7342453,0,0.340000004,1.200000048,185,,30
2016-07-03 03:00:00,0.117448084,16.60000038,0.971465647,11.30000019,100.8221817,0,0.129999995,0.300000012,234,0.15,-70,0.065690286,16.89999962,0.969292402,11.10000038,100.8954544,0,0.280000001,0.5,131,,-35,0.116548009,18,0.95414722,11.10000038,100.8661423,0,0.159999996,0.899999976,169,,0,0.178449214,18.39999962,0.961719811,11.10000038,100.8661423,0,0.310000002,1.100000024,190,,15,0.158933818,18.5,0.951560497,10.89999962,100.7489014,0,0.319999993,0.899999976,172,,30
2016-07-03 04:00:00,0.117448084,16.5,0.98108542,10.80000019,100.8514862,0,0.189999998,0.699999988,243,,-70,0.065690286,16.79999924,0.970752358,10.60000038,100.9247665,0,0.280000001,0.400000006,144,,-35,0.116548009,17.89999962,0.95653069,10.69999981,100.8807983,0,0.239999995,0.899999976,212,,0,0.178449214,18.10000038,0.964307368,10.69999981,100.8807983,0,0.5,1.299999952,204,,15,0.158933818,18.10000038,0.95998621,10.39999962,100.8075256,0,0.430000007,1.299999952,196,,30
2016-07-03 05:00:00,0.117897563,16.39999962,0.987520337,10.10000038,100.8807983,0,0.360000014,0.699999988,259,,-70,0.065690286,16.60000038,0.97785455,10,100.9687347,0,0.239999995,0.400000006,183,,-35,0.116548009,17.79999924,0.97785455,10,100.9247665,0,0.319999993,0.800000012,258,,0,0.178050756,17.79999924,0.97785455,10,100.9247665,0,0.300000012,0.800000012,219,,15,0.158518702,17.79999924,0.964462638,9.699999809,100.8514862,0,0.349999994,0.899999976,197,,30
2016-07-03 06:00:00,0.117448084,16.29999924,0.997719944,9.699999809,100.9247665,0,0.360000014,0.699999988,253,,-70,0.065198295,16.5,0.981091261,9.699999809,101.0127029,3.662109375,0.270000011,0.600000024,185,,-35,0.116548009,17.60000038,0.963237047,10.10000038,100.9687347,43.9453125,0.49000001,0.899999976,269,,0,0.178050756,17.39999962,0.96641773,10.30000019,100.9687347,58.59375,0.330000013,0.699999988,247,,15,0.158518702,17.39999962,0.968019664,9.899999619,100.8954544,45.77636719,0.310000002,0.800000012,220,,30
2016-07-03 07:00:00,0.117897563,16.20000076,1.014339209,10.30000019,100.9394226,9.155273438,0.270000011,0.600000024,242,,-70,0.065198295,16.39999962,0.9930076,10.5,101.027359,31.12792969,0.25999999,0.400000006,177,,-35,0.116548009,17.5,0.876827776,12.5,100.9980469,192.2607422,0.560000002,1.299999952,273,,0,0.179245099,17.20000076,0.864866495,13.30000019,100.9980469,219.7265625,0.5,2,214,,15,0.158518702,17.20000076,0.88005811,12.80000019,100.8954544,183.1054688,0.49000001,2.299999952,199,,30
2016-07-03 08:00:00,0.117897563,16.10000038,0.950620532,12.19999981,100.9833908,20.14160156,0.319999993,1,250,,-70,0.064705901,16.29999924,0.898528993,12.60000038,101.0713272,42.11425781,0.230000004,0.899999976,180,,-35,0.116097413,17.39999962,0.769686282,15.10000038,101.027359,190.4296875,0.569999993,1.799999952,279,,0,0.180436358,17.29999924,0.761533201,15.5,101.027359,360.7177734,0.639999986,3.400000095,201,,15,0.158518702,17,0.768786073,15,100.9247665,311.2792969,0.75999999,2.700000048,182,,30
2016-07-03 09:00:00,0.117897563,16,0.824285924,14.5,100.9980469,69.58007813,0.330000013,1.399999976,249,,-70,0.064213112,16.20000076,0.806934774,14.60000038,101.0713272,86.05957031,0.300000012,1.299999952,220,,-35,0.115195103,17.29999924,0.709084332,16.5,101.0566711,208.7402344,0.620000005,2.400000095,269,,0,0.180436358,17.70000076,0.684139192,17.29999924,101.0566711,510.8642578,0.720000029,4,188,,15,0.158518702,16.89999962,0.689597726,16.70000076,100.9540787,465.0878906,0.829999983,3.299999952,176,,30
2016-07-03 10:00:00,0.118346676,15.89999962,0.689597726,16.70000076,101.027359,172.1191406,0.360000014,1.600000024,263,,-70,0.06322635,16.10000038,0.692149699,16.39999962,101.0859833,124.5117188,0.289999992,1.200000048,240,,-35,0.115195103,17.39999962,0.613786936,17.79999924,101.0566711,236.2060547,0.870000005,3.400000095,242,,0,0.180832773,18.29999924,0.595805168,18.39999962,101.0566711,602.4169922,1.049999952,4.400000095,198,,15,0.158518702,17.20000076,0.596411943,18,100.9687347,565.7958984,0.970000029,3.900000095,187,,30
2016-07-03 11:00:00,0.119243778,15.89999962,0.625508368,17.5,101.0127029,137.3291016,0.400000006,1.299999952,269,,-70,0.062732384,16.10000038,0.627549112,17.70000076,101.0859833,355.2246094,0.289999992,1.100000024,225,,-35,0.114743389,17.70000076,0.57938689,18.20000076,101.0566711,399.1699219,0.910000026,5.5,248,,0,0.181624562,19,0.560196638,19,101.0566711,628.0517578,1.019999981,5,207,,15,0.158933818,18,0.553402424,18.79999924,100.9687347,613.4033203,1.019999981,4.300000191,189,,30
2016-07-03 12:00:00,0.120586656,15.89999962,0.587383986,18.5,100.9833908,221.5576172,0.400000006,1.899999976,262,,-70,0.062732384,16.10000038,0.588387072,18.60000038,101.0713272,139.1601563,0.300000012,1.100000024,192,,-35,0.114743389,17.89999962,0.539567351,18.79999924,101.0420151,346.0693359,1.190000057,4.800000191,219,,0,0.182019949,19.79999924,0.529775739,19.5,101.027359,565.7958984,1.379999995,5.099999905,203,,15,0.159348577,18.79999924,0.528638184,19.39999962,100.9394226,569.4580078,1.279999971,5.199999809,195,,30
2016-07-03 13:00:00,0.121033542,15.89999962,0.592083097,18.5,100.9540787,95.21484375,0.370000005,1.399999976,241,,-70,0.062732384,16.10000038,0.596782148,18.5,101.0420151,106.2011719,0.300000012,1.100000024,178,,-35,0.114743389,18.10000038,0.553402424,18.79999924,101.0127029,91.55273438,1.129999995,4.5,215,,0,0.182414994,20.39999962,0.534190536,19.5,100.9980469,600.5859375,1.470000029,4.300000191,204,,15,0.159762979,19.60000038,0.528638184,19.39999962,100.9247665,589.5996094,1.429999948,5.099999905,195,,30
2016-07-03 14:00:00,0.121033542,16,0.550849855,19.39999962,100.9101105,126.3427734,0.439999998,1.600000024,259,,-70,0.06322635,16.20000076,0.558758855,19.29999924,100.9980469,98.87695313,0.300000012,1,206,,-35,0.114743389,18.20000076,0.522106469,19.60000038,100.9687347,75.07324219,0.860000014,5.5,234,,0,0.182809696,20.60000038,0.506263494,20.5,100.9540787,569.4580078,1.169999957,4.5,201,,15,0.159762979,20.10000038,0.493814409,20.5,100.8807983,593.2617188,1.029999971,4.199999809,185,,30
2016-07-03 15:00:00,0.121480055,16.10000038,0.484769881,20.79999924,100.8661423,219.7265625,0.400000006,1.5,267,,-70,0.063719928,16.29999924,0.506263494,20.5,100.9247665,210.5712891,0.270000011,1.299999952,184,,-35,0.114743389,18.29999924,0.461909324,20.60000038,100.9101105,86.05957031,0.949999988,6.599999905,212,,0,0.18320407,20.79999924,0.43262291,22.10000038,100.9101105,748.9013672,1.200000048,5,195,,15,0.160177037,20.70000076,0.430315912,21.89999962,100.8221817,772.7050781,1.340000033,6.199999809,185,,30
2016-07-03 16:00:00,0.121480055,16.10000038,0.505033314,20,100.8368378,51.26953125,0.360000014,1.5,232,,-70,0.063719928,16.5,0.514514387,19.70000076,100.8954544,49.43847656,0.280000001,1.200000048,188,,-35,0.114743389,18.29999924,0.472142011,20.10000038,100.8807983,45.77636719,0.689999998,3.799999952,234,,0,0.18320407,20.79999924,0.439959228,20.79999924,100.8807983,276.4892578,1.169999957,4.599999905,192,,15,0.160177037,21.5,0.423664451,20.79999924,100.7928696,311.2792969,1.070000052,4.400000095,190,,30
2016-07-03 17:00:00,0.121033542,16.10000038,0.524185598,20.20000076,100.8221817,75.07324219,0.340000004,1.600000024,229,,-70,0.063719928,16.60000038,0.527437925,20.10000038,100.8807983,115.3564453,0.300000012,1.399999976,172,,-35,0.114291303,18.29999924,0.474741906,20.29999924,100.8661423,54.93164063,1.460000038,5.099999905,201,,0,0.18320407,20.70000076,0.459071875,20.70000076,100.8807983,184.9365234,1.950000048,5,202,,15,0.160177037,21.79999924,0.44517535,21.20000076,100.7928696,503.5400391,1.830000043,5.400000095,196,,30
2016-07-03 18:00:00,0.121033542,16.20000076,0.480169743,20.39999962,100.8075256,34.79003906,0.389999986,1.399999976,251,,-70,0.063719928,16.70000076,0.503049076,20.20000076,100.8807983,31.12792969,0.289999992,1.299999952,187,,-35,0.114291303,18.29999924,0.45094201,20.39999962,100.8514862,25.63476563,1.100000024,5,212,,0,0.18320407,20.5,0.441288382,20.60000038,100.8514862,53.10058594,1.419999957,5.199999809,206,,15,0.159762979,21.79999924,0.399491221,21.60000038,100.7782135,355.2246094,1.480000019,6.5,196,,30
2016-07-03 19:00:00,0.121033542,16.29999924,0.601186633,19,100.8368378,32.95898438,0.280000001,1.200000048,256,,-70,0.064213112,16.70000076,0.622577727,18.79999924,100.9247665,36.62109375,0.189999998,1.100000024,186,,-35,0.113838844,18.29999924,0.57029146,19.10000038,100.8954544,27.46582031,0.330000013,1.799999952,265,,0,0.182809696,20.20000076,0.547434926,19.5,100.8807983,98.87695313,0.430000007,2.599999905,183,,15,0.159762979,21.79999924,0.50579375,19.70000076,100.7928696,117.1875,0.50999999,3.200000048,139,,30
2016-07-03 20:00:00,0.120586656,16.29999924,0.586619556,18.89999962,100.8807983,18.31054688,0.319999993,1.100000024,265,,-70,0.064213112,16.79999924,0.61256063,18.70000076,100.9687347,18.31054688,0.189999998,0.899999976,194,,-35,0.113838844,18.20000076,0.577453613,18.89999962,100.9394226,16.47949219,0.340000004,1.600000024,287,,0,0.182414994,20,0.574817538,19.10000038,100.9101105,64.08691406,0.469999999,2.599999905,144,,15,0.158933818,21.60000038,0.522998273,19.29999924,100.8221817,80.56640625,0.600000024,4.599999905,86,,30
2016-07-03 21:00:00,0.120586656,16.29999924,0.651895523,18.29999924,100.9394226,7.32421875,0.25999999,0.899999976,258,,-70,0.064213112,16.79999924,0.66495198,18.10000038,101.0127029,7.32421875,0.180000007,0.600000024,170,,-35,0.113838844,18.20000076,0.632862091,18.29999924,100.9833908,10.98632813,0.289999992,2.599999905,290,,0,0.182414994,19.79999924,0.628905475,18.39999962,100.9833908,38.45214844,0.430000007,2.599999905,33,,15,0.158518702,21.29999924,0.613828659,18.29999924,100.8954544,42.11425781,0.569999993,3.599999905,39,,30
2016-07-03 22:00:00,0.120586656,16.29999924,0.71065414,16.70000076,100.9980469,0,0.219999999,0.600000024,244,,-70,0.063719928,16.79999924,0.709886849,16.60000038,101.0566711,0,0.189999998,0.400000006,160,,-35,0.113386005,18.10000038,0.700125933,16.70000076,101.027359,0,0.25999999,0.699999988,247,,0,0.182019949,19.60000038,0.709084332,16.5,101.0420151,5.493164063,0.300000012,0.800000012,242,,15,0.158103243,20.89999962,0.712771773,16.29999924,100.9394226,5.493164063,0.239999995,0.800000012,218,,30
2016-07-03 23:00:00,0.120586656,16.29999924,0.758759558,14.60000038,101.0566711,0,0.300000012,0.600000024,261,,-70,0.063719928,16.70000076,0.776825309,14.60000038,101.1299438,0,0.230000004,0.5,182,,-35,0.113386005,18.10000038,0.762529254,14.39999962,101.1006317,0,0.360000014,1.100000024,253,,0,0.182019949,19.29999924,0.789925337,14.10000038,101.1006317,0,0.409999996,1.100000024,208,,15,0.157687426,20.5,0.781337976,13.89999962,100.9980469,0,0.379999995,1,199,,30
2016-07-04 00:00:00,0.120586656,16.29999924,0.841888726,13,101.1006317,0,0.479999989,0.899999976,261,,-70,0.06322635,16.70000076,0.833962739,12.89999962,101.173912,0,0.349999994,0.600000024,221,,-35,0.113386005,18,0.827237189,12.89999962,101.1445999,0,0.529999971,1,270,,0,0.182019949,18.89999962,0.839440048,12.80000019,101.1299438,0,0.379999995,0.899999976,250,,15,0.157271251,20,0.849211156,12.5,101.0420151,0,0.310000002,0.699999988,228,,30
2016-07-04 01:00:00,0.120139405,16.20000076,0.893105447,12.10000038,101.1299438,0,0.540000021,1,263,,-70,0.06322635,16.60000038,0.871841073,12.10000038,101.2032242,0,0.25,0.5,212,,-35,0.113386005,17.89999962,0.864752889,12.10000038,101.173912,0,0.600000024,1.100000024,272,,0,0.182019949,18.60000038,0.860442758,12.30000019,101.173912,0,0.389999986,0.800000012,263,,15,0.157271251,19.60000038,0.877603531,12,101.0859833,0,0.289999992,0.800000012,234,,30
2016-07-04 02:00:00,0.120586656,16.20000076,0.913087249,11.39999962,101.1445999,0,0.600000024,1.299999952,258,,-70,0.06322635,16.60000038,0.898240268,11.39999962,101.2178802,0,0.25999999,0.699999988,200,,-35,0.113386005,17.79999924,0.883393347,11.39999962,101.1885681,0,0.589999974,1.299999952,264,,0,0.182019949,18.20000076,0.892314315,11.5,101.1885681,0,0.469999999,1.299999952,229,,15,0.156854734,19.10000038,0.908711612,11.10000038,101.1152878,0,0.439999998,1.299999952,188,,30
2016-07-04 03:00:00,0.120139405,16.10000038,0.916284263,11.10000038,101.1445999,0,0.50999999,1.100000024,256,,-70,0.062732384,16.5,0.901139021,11.10000038,101.2325363,0,0.239999995,0.400000006,188,,-35,0.113386005,17.60000038,0.89356643,11.10000038,101.2032242,0,0.449999988,1.100000024,262,,0,0.181624562,17.89999962,0.939437747,10.60000038,101.1885681,0,0.75999999,1.5,199,,15,0.156854734,18.70000076,0.92207849,10.5,101.1006317,0,0.569999993,1.399999976,179,,30
2016-07-04 04:00:00,0.120139405,16,0.92207849,10.5,101.1299438,0,0.550000012,1,252,,-70,0.062732384,16.29999924,0.912383556,10.39999962,101.2178802,0,0.270000011,0.5,197,,-35,0.113386005,17.5,0.906316459,10.5,101.173912,0,0.49000001,1,261,,0,0.181624562,17.60000038,0.951612532,9.899999619,101.173912,0,0.839999974,1.5,196,,15,0.156437859,18.29999924,0.939519584,9.699999809,101.1006317,0,0.620000005,1.5,183,,30
2016-07-04 05:00:00,0.120139405,16,0.947048187,10.10000038,101.159256,0,0.540000021,1,255,,-70,0.062732384,16.20000076,0.937110662,10,101.2178802,0,0.280000001,0.5,204,,-35,0.113386005,17.39999962,0.930859327,10.10000038,101.1885681,0,0.519999981,1.100000024,264,,0,0.181228831,17.29999924,0.966272235,9.800000191,101.173912,1.831054688,0.649999976,1.299999952,208,,15,0.156437859,18,0.954219699,9.600000381,101.1006317,0,0.569999993,1.200000048,190,,30
2016-07-04 06:00:00,0.119691774,15.89999962,0.961557031,10,101.173912,0,0.49000001,0.899999976,254,,-70,0.062732384,16.10000038,0.945259452,10,101.2325363,1.831054688,0.289999992,0.600000024,195,,-35,0.113386005,17.29999924,0.909870625,10.69999981,101.2032242,40.28320313,0.569999993,1.200000048,266,,0,0.181228831,17,0.937840521,10.5,101.2032242,56.76269531,0.680000007,1.399999976,206,,15,0.156437859,17.60000038,0.932695091,10.19999981,101.1299438,42.11425781,0.610000014,1.399999976,189,,30
2016-07-04 07:00:00,0.119691774,15.80000019,0.964307368,10.69999981,101.1885681,9.155273438,0.400000006,0.800000012,255,,-70,0.062732384,16,0.936212778,10.89999962,101.2765045,29.296875,0.25,0.5,190,,-35,0.112932801,17.10000038,0.849211156,12.5,101.2471924,179.4433594,0.670000017,1.200000048,274,,0,0.181624562,16.79999924,0.837554276,13.19999981,101.2325363,201.4160156,0.379999995,1.100000024,238,,15,0.156020626,17.29999924,0.852979422,12.80000019,101.1445999,161.1328125,0.409999996,1.899999976,203,,30
2016-07-04 08:00:00,0.119243778,15.69999981,0.913906515,12.80000019,101.2178802,21.97265625,0.409999996,1.299999952,247,,-70,0.062732384,15.89999962,0.881978691,13,101.2911606,43.9453125,0.330000013,0.899999976,207,,-35,0.112479217,17.10000038,0.780523241,15,101.2471924,188.5986328,0.699999988,2.099999905,274,,0,0.181624562,16.89999962,0.743796945,16.10000038,101.2618484,357.0556641,0.479999989,3,217,,15,0.156020626,17.10000038,0.762314737,15.60000038,101.159256,307.6171875,0.680000007,3.099999905,190,,30
2016-07-04 09:00:00,0.119243778,15.60000038,0.793721557,15.19999981,101.2325363,69.58007813,0.379999995,1.299999952,260,,-70,0.062732384,15.80000019,0.771369338,15.30000019,101.3058167,78.73535156,0.319999993,1,232,,-35,0.112025261,17.10000038,0.687719882,17.10000038,101.2765045,208.7402344,0.629999995,1.799999952,277,,0,0.181624562,17.39999962,0.651211679,18.20000076,101.2765045,507.2021484,0.600000024,3.900000095,213,,15,0.156020626,17.10000038,0.652255774,17.70000076,101.1885681,461.4257813,0.680000007,3.200000048,166,,30
2016-07-04 10:00:00,0.119243778,15.60000038,0.645524621,17.5,101.2471924,173.9501953,0.460000008,1.700000048,259,,-70,0.062732384,15.80000019,0.648665309,17.29999924,101.3204727,122.6806641,0.310000002,1.200000048,230,,-35,0.111570932,17.10000038,0.584716976,18.70000076,101.2911606,241.6992188,0.75999999,3.099999905,274,,0,0.182019949,18,0.557206035,19.60000038,101.2911606,653.6865234,0.75999999,3.5,205,,15,0.156020626,17.39999962,0.556713104,19.10000038,101.2032242,617.0654297,0.779999971,4,168,,30
2016-07-04 11:00:00,0.119243778,15.5,0.570795119,18.70000076,101.2471924,166.6259766,0.469999999,1.700000048,259,,-70,0.06322635,15.69999981,0.556713104,19.10000038,101.3204727,391.8457031,0.300000012,1.200000048,227,,-35,0.111570932,17.39999962,0.526493907,19.60000038,101.2911606,424.8046875,0.860000014,4.699999809,251,,0,0.182019949,18.79999924,0.497964114,20.5,101.2765045,728.7597656,1.00999999,6.099999905,188,,15,0.156437859,18.20000076,0.493409693,20.10000038,101.1885681,706.7871094,1.049999952,5.5,173,,30
2016-07-04 12:00:00,0.119243778,15.60000038,0.569305539,19,101.2178802,111.6943359,0.389999986,1.399999976,252,,-70,0.06322635,15.69999981,0.565765321,19.10000038,101.2911606,113.5253906,0.280000001,1,203,,-35,0.111570932,17.60000038,0.516531348,19.5,101.2765045,188.5986328,0.939999998,4.5,231,,0,0.182809696,19.79999924,0.496473461,20,101.2618484,397.3388672,1.24000001,4.5,198,,15,0.156854734,19.39999962,0.490945518,19.89999962,101.173912,408.3251953,1.090000033,3.799999952,189,,30
2016-07-04 13:00:00,0.118795417,15.60000038,0.577453613,18.89999962,101.2032242,84.22851563,0.370000005,1.5,268,,-70,0.063719928,15.80000019,0.586619556,18.89999962,101.2765045,80.56640625,0.239999995,1.399999976,196,,-35,0.111570932,17.79999924,0.531938434,19.29999924,101.2618484,75.07324219,0.689999998,6.300000191,239,,0,0.182809696,20.20000076,0.4976632,20.10000038,101.2471924,432.1289063,0.910000026,6.199999809,200,,15,0.157271251,20.10000038,0.479353666,20,101.159256,452.2705078,0.939999998,4.800000191,183,,30
2016-07-04 14:00:00,0.118795417,15.69999981,0.557206035,19.60000038,101.173912,100.7080078,0.360000014,1.899999976,268,,-70,0.063719928,15.89999962,0.547434926,19.5,101.2471924,108.0322266,0.270000011,1.299999952,194,,-35,0.111570932,17.89999962,0.487913549,20,101.2178802,69.58007813,0.810000002,4.900000095,240,,0,0.182809696,20.39999962,0.450676411,21,101.2032242,485.2294922,1.039999962,5.400000095,203,,15,0.157271251,20.39999962,0.437260717,20.89999962,101.1152878,510.8642578,0.980000019,4.300000191,184,,30
2016-07-04 15:00:00,0.118346676,15.69999981,0.438604712,21,101.159256,212.4023438,0.5,2,252,,-70,0.064213112,16,0.444032907,20.79999924,101.2178802,190.4296875,0.349999994,1.299999952,228,,-35,0.111570932,18,0.421065897,20.89999962,101.2032242,89.72167969,0.829999983,5.099999905,242,,0,0.182414994,20.5,0.385126412,22.20000076,101.2032242,686.6455078,1.159999967,5.099999905,191,,15,0.157271251,21,0.376193851,22.10000038,101.1152878,723.2666016,1.269999981,5.199999809,173,,30
2016-07-04 16:00:00,0.117897563,15.80000019,0.493942678,20.89999962,101.1152878,82.39746094,0.340000004,1.100000024,267,,-70,0.064213112,16.20000076,0.501064658,20.79999924,101.173912,102.5390625,0.25999999,1.200000048,174,,-35,0.111570932,18,0.435918629,21.10000038,101.159256,62.25585938,0.639999986,3.599999905,255,,0,0.182414994,20.60000038,0.397418976,22,101.159256,331.4208984,0.930000007,5.099999905,174,,15,0.157271251,21.70000076,0.373080224,22.39999962,101.0713272,507.2021484,0.850000024,4.900000095,166,,30
2016-07-04 17:00:00,0.117897563,15.89999962,0.522862315,20.5,101.1006317,49.43847656,0.270000011,1.100000024,262,,-70,0.064213112,16.29999924,0.537760735,20.29999924,101.173912,51.26953125,0.180000007,0.800000012,183,,-35,0.111570932,18,0.475467294,20.70000076,101.1445999,47.60742188,0.379999995,1.5,286,,0,0.182019949,20.60000038,0.437064737,21.5,101.1445999,190.4296875,0.469999999,2.099999905,202,,15,0.157271251,22.29999924,0.393200874,21.70000076,101.0566711,230.7128906,0.589999974,3,77,,30
2016-07-04 18:00:00,0.117448084,15.89999962,0.608731627,20.20000076,101.0713272,43.9453125,0.209999993,0.699999988,232,,-70,0.064213112,16.39999962,0.612508595,20.10000038,101.1445999,43.9453125,0.209999993,0.5,166,,-35,0.11111623,18,0.512356997,20.70000076,101.1152878,36.62109375,0.289999992,1.299999952,237,,0,0.182019949,20.60000038,0.458255053,21.29999924,101.1152878,151.9775391,0.49000001,1.600000024,176,,15,0.156854734,22.39999962,0.41379419,21.79999924,101.027359,216.0644531,0.360000014,1.899999976,132,,30
2016-07-04 19:00:00,0.117448084,16,0.573512435,20,101.0420151,32.95898438,0.219999999,0.800000012,199,,-70,0.064213112,16.39999962,0.564156711,19.89999962,101.1299438,32.95898438,0.270000011,0.600000024,157,,-35,0.11111623,18,0.442676455,20.70000076,101.1006317,25.63476563,1.059999943,2.900000095,192,,0,0.182019949,20.60000038,0.430556923,21,101.0859833,84.22851563,1.230000019,2.900000095,197,,15,0.156437859,22.29999924,0.425301433,21.20000076,100.9980469,124.5117188,0.74000001,2.599999905,178,,30
2016-07-04 20:00:00,0.117448084,16,0.623958886,19,101.0127029,9.155273438,0.219999999,0.5,238,,-70,0.064213112,16.5,0.582968891,19,101.1006317,9.155273438,0.200000003,0.400000006,167,,-35,0.110661156,18,0.480998725,19.79999924,101.0713272,9.155273438,0.50999999,1.799999952,243,,0,0.182019949,20.39999962,0.485332042,19.79999924,101.0566711,29.296875,0.600000024,1.799999952,238,,15,0.156020626,22.10000038,0.51771903,19.60000038,100.9687347,42.11425781,0.300000012,1.200000048,209,,30
2016-07-04 21:00:00,0.116998233,16.10000038,0.683126926,17.89999962,100.9980469,1.831054688,0.239999995,0.5,238,,-70,0.064213112,16.5,0.662889898,17.79999924,101.0713272,1.831054688,0.200000003,0.300000012,172,,-35,0.110661156,18,0.592674613,18.10000038,101.0420151,1.831054688,0.349999994,1.200000048,272,,0,0.181624562,20.10000038,0.658729553,17.89999962,101.0566711,14.6484375,0.349999994,1,244,,15,0.155603051,21.70000076,0.661354244,17.60000038,100.9540787,20.14160156,0.219999999,0.800000012,215,,30
2016-07-04 22:00:00,0.116998233,16.10000038,0.733632743,16.20000076,100.9980469,0,0.360000014,0.699999988,257,,-70,0.064213112,16.5,0.7173298,16.20000076,101.0566711,0,0.200000003,0.300000012,191,,-35,0.110661156,17.89999962,0.701026857,16.20000076,101.027359,0,0.550000012,0.899999976,272,,0,0.181624562,19.70000076,0.767961502,15.60000038,101.027359,0,0.430000007,0.899999976,227,,15,0.155185118,21.20000076,0.755850136,15.5,100.9247665,0,0.289999992,0.699999988,205,,30
2016-07-04 23:00:00,0.116998233,16.10000038,0.788869083,14.60000038,100.9833908,0,0.270000011,0.800000012,235,,-70,0.064213112,16.5,0.793030441,14.39999962,101.0566711,0,0.289999992,0.800000012,177,,-35,0.111570932,17.89999962,0.787639081,13.89999962,101.027359,0,0.560000002,2.5,222,,0,0.181228831,19.29999924,0.821329355,13.5,101.027359,0,0.800000012,1.899999976,201,,15,0.154766828,20.70000076,0.829765916,13.10000038,100.9247665,0,0.709999979,1.299999952,187,,30
2016-07-05 00:00:00,0.116548009,16.10000038,0.800241292,13.89999962,100.9833908,0,0.340000004,1,248,,-70,0.064213112,16.5,0.821329355,13.5,101.0420151,0,0.379999995,0.800000012,203,,-35,0.110661156,17.79999924,0.816489697,13.10000038,101.0420151,0,0.50999999,1.799999952,257,,0,0.180832773,18.89999962,0.844957709,12.69999981,101.027359,0,0.660000026,1.5,217,,15,0.15434818,20.20000076,0.854806304,12.39999962,100.9247665,0,0.569999993,1.5,194,,30
2016-07-05 01:00:00,0.116548009,16,0.817769527,13.19999981,100.9833908,0,0.409999996,0.899999976,254,,-70,0.064213112,16.39999962,0.811174631,13.19999981,101.0566711,0,0.419999987,0.800000012,219,,-35,0.110205702,17.70000076,0.786242306,13.30000019,101.027359,0,0.660000026,1.299999952,273,,0,0.180832773,18.60000038,0.833962739,12.89999962,101.027359,0,0.49000001,1.100000024,261,,15,0.15434818,19.70000076,0.854806304,12.39999962,100.9247665,0,0.469999999,1.5,212,,30
2016-07-05 02:00:00,0.116548009,16,0.863019466,12.5,100.9540787,0,0.439999998,0.899999976,253,,-70,0.063719928,16.29999924,0.842307031,12.5,101.027359,0,0.360000014,0.800000012,220,,-35,0.110205702,17.60000038,0.835402846,12.5,100.9980469,0,0.709999979,1.399999976,275,,0,0.180832773,18.20000076,0.831329346,12.69999981,100.9980469,0,0.600000024,1.200000048,271,,15,0.153929189,19.29999924,0.853447318,12.30000019,100.8807983,0,0.449999988,1.700000048,233,,30
2016-07-05 03:00:00,0.116097413,15.89999962,0.873162568,12.19999981,100.8954544,0,0.389999986,0.899999976,256,,-70,0.063719928,16.20000076,0.859079301,12.19999981,100.9687347,0,0.270000011,0.600000024,214,,-35,0.110205702,17.5,0.852037668,12.19999981,100.9394226,0,0.589999974,1.100000024,278,,0,0.180436358,18,0.859079301,12.19999981,100.9394226,0,0.5,1.100000024,266,,15,0.153929189,18.89999962,0.887870908,11.69999981,100.8221817,0,0.310000002,1,217,,30
2016-07-05 04:00:00,0.116097413,15.80000019,0.875655234,12.39999962,100.8368378,0,0.270000011,0.899999976,250,,-70,0.063719928,16.10000038,0.868705571,12.39999962,100.9101105,0,0.289999992,0.800000012,207,,-35,0.110205702,17.39999962,0.856115341,12.5,100.8807983,0,0.540000021,1.5,270,,0,0.180436358,17.70000076,0.811174631,13.19999981,100.8807983,0,0.660000026,2,245,,15,0.153929189,18.60000038,0.833962739,12.89999962,100.7782135,0,0.610000014,2.299999952,226,,30
2016-07-05 05:00:00,0.115646444,15.80000019,0.881041288,12.89999962,100.7635574,0,0.25999999,0.600000024,258,,-70,0.063719928,16.10000038,0.873288453,12.80000019,100.8221817,0,0.270000011,0.699999988,211,,-35,0.110205702,17.29999924,0.860864758,12.89999962,100.8075256,0,0.460000008,1,276,,0,0.180436358,17.5,0.844149232,13.19999981,100.8221817,0,0.439999998,1.200000048,269,,15,0.15350984,18.39999962,0.848570406,13,100.7195892,0,0.360000014,1.899999976,234,,30
2016-07-05 06:00:00,0.115646444,15.69999981,0.905387998,12.60000038,100.7195892,1.831054688,0.119999997,0.5,200,,-70,0.06322635,16,0.903453827,12.39999962,100.7928696,3.662109375,0.219999999,0.400000006,141,,-35,0.110205702,17.20000076,0.889554501,12.39999962,100.7635574,18.31054688,0.389999986,1.200000048,40,,0,0.180436358,17.39999962,0.902415574,12.30000019,100.7635574,34.79003906,0.379999995,1.200000048,38,,15,0.15350984,18.10000038,0.900193632,12.10000038,100.660965,29.296875,0.330000013,1.200000048,46,,30
2016-07-05 07:00:00,0.115646444,15.69999981,0.898301959,13.39999962,100.660965,12.81738281,0.079999998,0.300000012,276,,-70,0.06322635,15.89999962,0.891074598,13.30000019,100.7342453,14.6484375,0.180000007,0.400000006,172,,-35,0.109293669,17.10000038,0.844349086,13.89999962,100.7049332,27.46582031,0.349999994,1,67,,0,0.180436358,17.29999924,0.834261,14.19999981,100.7049332,78.73535156,0.270000011,1.100000024,38,,15,0.15350984,18,0.839684427,14.10000038,100.6169968,78.73535156,0.200000003,0.600000024,53,,30
2016-07-05 08:00:00,0.115195103,15.60000038,0.861980736,14.80000019,100.6316528,27.46582031,0.140000001,0.600000024,230,,-70,0.06322635,15.80000019,0.832817614,14.89999962,100.7049332,42.11425781,0.289999992,0.699999988,168,,-35,0.10883709,17,0.746226788,15.69999981,100.660965,137.3291016,1.389999986,4,186,,0,0.180436358,17.29999924,0.743796945,16.10000038,100.675621,243.5302734,1.25999999,3.400000095,199,,15,0.15350984,17.89999962,0.749266028,16.10000038,100.5730362,225.2197266,0.959999979,3.200000048,189,,30
2016-07-05 09:00:00,0.115195103,15.5,0.785377383,17.20000076,100.5437241,51.26953125,0.280000001,0.899999976,212,,-70,0.063719928,15.80000019,0.725997865,17.60000038,100.6463089,64.08691406,0.389999986,0.899999976,166,,-35,0.108380139,17,0.64642334,18.20000076,100.6023483,109.8632813,2.799999952,6.199999809,196,,0,0.180832773,17.5,0.644423962,18.60000038,100.6023483,292.96875,2.75,5.5,205,,15,0.15350984,18,0.645044923,18.70000076,100.5144119,291.1376953,2.160000086,5.400000095,195,,30
2016-07-05 10:00:00,0.114743389,15.5,0.687721074,19,100.5144119,89.72167969,0.379999995,1.200000048,191,,-70,0.063719928,15.80000019,0.656707823,19.20000076,100.5730362,89.72167969,0.460000008,1.100000024,160,,-35,0.108380139,17,0.607929647,19.29999924,100.5437241,120.8496094,3.349999905,6.199999809,194,,0,0.180832773,17.89999962,0.606080472,19.70000076,100.5583801,377.1972656,3.140000105,6.5,202,,15,0.15350984,18.29999924,0.602915585,19.89999962,100.4704437,379.0283203,2.599999905,5,190,,30
2016-07-05 11:00:00,0.114743389,15.5,0.607608378,21,100.4850998,173.9501953,0.400000006,1.399999976,214,,-70,0.064213112,15.80000019,0.581452191,21.5,100.5437241,340.5761719,0.409999996,1.299999952,177,,-35,0.108380139,17.10000038,0.542428553,21.5,100.529068,426.6357422,2.519999981,6.099999905,198,,0,0.181228831,18.39999962,0.530950963,22.20000076,100.529068,725.0976563,2.670000076,5.300000191,201,,15,0.15350984,18.79999924,0.534195244,22.10000038,100.4118195,704.9560547,2.390000105,5.699999809,193,,30
2016-07-05 12:00:00,0.114291303,15.60000038,0.55208379,23,100.4118195,333.2519531,0.460000008,1.700000048,222,,-70,0.064213112,15.80000019,0.545213223,23.10000038,100.4850998,210.5712891,0.360000014,1.100000024,182,,-35,0.107922807,17.20000076,0.510680497,23.29999924,100.4704437,574.9511719,1.75999999,7.699999809,210,,0,0.181624562,19.39999962,0.499295801,23.89999962,100.4557877,845.9472656,2.049999952,6,207,,15,0.15434818,19.89999962,0.505339682,23.70000076,100.3678589,836.7919922,2.220000029,6.400000095,200,,30
2016-07-05 13:00:00,0.114291303,15.60000038,0.562769234,23,100.3678589,122.6806641,0.379999995,1.399999976,209,,-70,0.064213112,15.89999962,0.548964977,23.20000076,100.4411316,172.1191406,0.360000014,1.200000048,170,,-35,0.107922807,17.39999962,0.509809792,23.10000038,100.4264755,86.05957031,2.220000029,6,201,,0,0.182019949,20.39999962,0.50192523,23.70000076,100.4118195,448.6083984,2.359999895,6.699999809,208,,15,0.155185118,21.20000076,0.505339682,23.70000076,100.3238907,468.75,2.390000105,6.300000191,196,,30
2016-07-05 14:00:00,0.114291303,15.69999981,0.563041031,23.20000076,100.3092346,93.38378906,0.389999986,1.399999976,201,,-70,0.064213112,16.10000038,0.548964977,23.20000076,100.3678589,89.72167969,0.370000005,1.200000048,167,,-35,0.107922807,17.70000076,0.500653505,23.39999962,100.3532028,78.73535156,2.269999981,6.099999905,199,,0,0.182019949,21,0.486244172,24,100.3532028,408.3251953,2.680000067,5.300000191,204,,15,0.155603051,22,0.489597589,24,100.2652664,439.453125,2.549999952,5.400000095,198,,30
2016-07-05 15:00:00,0.113838844,15.80000019,0.587601781,22.70000076,100.2359543,67.74902344,0.349999994,1.5,210,,-70,0.065198295,16.29999924,0.562417805,22.79999924,100.3092346,71.41113281,0.340000004,1.299999952,175,0.05,-35,0.107922807,17.89999962,0.510255933,23.20000076,100.2799225,62.25585938,1.649999976,6.400000095,206,,0,0.182019949,21.20000076,0.498087227,23.60000038,100.2799225,287.4755859,2.200000048,6.699999809,210,,15,0.155603051,22.39999962,0.494652122,23.60000038,100.1919861,316.7724609,2.230000019,5.5,201,,30
2016-07-05 16:00:00,0.113838844,15.89999962,0.702814162,21.39999962,100.2066422,36.62109375,0.409999996,1.700000048,243,0.05,-70,0.065198295,16.5,0.698887825,21.39999962,100.2799225,38.45214844,0.280000001,1,194,,-35,0.107465103,18,0.655174136,21.79999924,100.2506104,38.45214844,0.930000007,4.400000095,243,,0,0.180832773,21.29999924,0.628071606,22.29999924,100.2506104,162.9638672,1.169999957,6.099999905,222,,15,0.155185118,22.5,0.620638788,22.29999924,100.162674,177.6123047,1.399999976,5.699999809,205,,30
2016-07-05 17:00:00,0.113838844,16,0.779854417,21.10000038,100.162674,106.2011719,0.310000002,1.100000024,246,0.05,-70,0.064705901,16.60000038,0.790981174,21.20000076,100.2359543,216.0644531,0.25,0.800000012,155,,-35,0.107465103,18,0.718519509,21.39999962,100.2066422,60.42480469,0.75,5.199999809,215,,0,0.178449214,21.29999924,0.685458958,21.89999962,100.2066422,159.3017578,0.99000001,4.300000191,192,,15,0.154766828,22.39999962,0.633421123,23.20000076,100.1187134,578.6132813,0.819999993,3.799999952,185,,30
2016-07-05 18:00:00,0.113386005,16.10000038,0.700214386,22,100.0747452,31.12792969,0.319999993,1.100000024,224,0.05,-70,0.065198295,16.60000038,0.677504778,22,100.1480179,31.12792969,0.310000002,1.299999952,172,,-35,0.107465103,18.10000038,0.605793655,22.39999962,100.1333694,23.80371094,1.409999967,5.5,210,,0,0.180039614,21.10000038,0.594827831,22.60000038,100.1333694,86.05957031,1.860000014,4.900000095,212,,15,0.15434818,22.39999962,0.577117026,23.20000076,100.030777,265.5029297,1.779999971,4.400000095,204,,30
2016-07-05 19:00:00,0.107922807,16.20000076,0.929969072,18.10000038,100.0600891,10.98632813,0.349999994,1.100000024,208,2.25,-70,0.065690286,16.70000076,0.921286762,18,100.1333694,12.81738281,0.319999993,1,193,,-35,0.108380139,18.10000038,0.917341888,17.89999962,100.1040573,12.81738281,0.75999999,2.299999952,264,1.35,0,0.174850777,20.79999924,0.9049927,18.20000076,100.1040573,53.10058594,0.790000021,2.5,254,9.4,15,0.155185118,22.39999962,0.889813602,18.29999924,100.0161209,60.42480469,0.529999971,1.799999952,244,9.6,30
2016-07-05 20:00:00,0.130771756,16.29999924,0.994517624,17.60000038,100.030777,16.47949219,0.239999995,1,199,0.7,-70,0.065690286,16.79999924,0.987010777,17.39999962,100.1040573,18.31054688,0.349999994,1.100000024,210,,-35,0.109749876,18.10000038,0.974627316,17.60000038,100.0600891,20.14160156,0.629999995,2.200000048,258,0.15,0,0.178847328,20.5,0.961257219,17.89999962,100.0600891,67.74902344,0.75,2.400000095,243,3.4,15,0.154766828,22,0.925150573,18.10000038,99.97215271,86.05957031,0.769999981,2.299999952,226,3.2,30
2016-07-05 21:00:00,0.136008814,16.29999924,0.995809317,17.5,100.030777,1.831054688,0.119999997,0.600000024,182,,-70,0.065690286,16.79999924,0.988201022,17.29999924,100.0894012,3.662109375,0.239999995,0.600000024,200,,-35,0.109749876,18.10000038,0.981975019,17.39999962,100.0600891,3.662109375,0.230000004,1.200000048,246,,0,0.176453516,20.29999924,0.948735714,17.70000076,100.0600891,18.31054688,0.400000006,1.799999952,215,,15,0.15434818,21.60000038,0.892193496,18,99.97215271,23.80371094,0.560000002,1.700000048,185,,30
2016-07-05 22:00:00,0.13644287,16.29999924,0.98904562,16.20000076,100.045433,0,0.150000006,0.899999976,196,,-70,0.066181891,16.79999924,0.984437108,16.10000038,100.1187134,0,0.25999999,0.800000012,183,,-35,0.109293669,18,0.956439734,16.20000076,100.0894012,0,0.239999995,1.600000024,241,,0,0.175251976,20.10000038,0.899695039,16.79999924,100.0747452,1.831054688,0.5,4,213,,15,0.15434818,21.20000076,0.831102371,17.29999924,99.98680878,1.831054688,0.769999981,3.5,189,,30
2016-07-05 23:00:00,0.136008814,16.29999924,0.942164481,15.80000019,100.045433,0,0.239999995,1.299999952,244,,-70,0.0666731,16.79999924,0.948658288,15.60000038,100.1333694,0,0.330000013,1.100000024,185,,-35,0.109293669,18,0.902922809,15.89999962,100.1040573,0,0.340000004,1.799999952,241,,0,0.174047351,19.79999924,0.837030768,16.60000038,100.1040573,0,0.649999976,3.200000048,209,0.2,15,0.15434818,20.70000076,0.779892862,17,100.0014648,0,0.839999974,4.5,188,,30
2016-07-06 00:00:00,0.135574386,16.29999924,0.985924125,15,100.0161209,0,0.119999997,0.600000024,183,,-70,0.067163914,16.79999924,0.986386776,14.89999962,100.1040573,0,0.270000011,0.600000024,155,,-35,0.10883709,17.89999962,0.927122116,15.10000038,100.0747452,0,0.200000003,1,240,,0,0.174047351,19.39999962,0.869662821,15.69999981,100.0600891,0,0.49000001,2.400000095,212,,15,0.15434818,20.20000076,0.830910563,15.89999962,99.97215271,0,0.689999998,2.200000048,194,,30
2016-07-06 01:00:00,0.135139614,16.29999924,0.96793884,15.10000038,100.0014648,0,0.280000001,1.299999952,226,,-70,0.067163914,16.70000076,0.962760746,14.89999962,100.0894012,0,0.300000012,1.399999976,178,,-35,0.10883709,17.89999962,0.892265975,15.39999962,100.0600891,0,0.529999971,2.900000095,226,,0,0.173645124,19.10000038,0.836626768,16,100.045433,0,0.949999988,4,207,,15,0.15434818,19.79999924,0.803956985,16.10000038,99.95749664,0,1.220000029,3.700000048,198,,30
2016-07-06 02:00:00,0.134268954,16.20000076,0.84078908,15.39999962,100.030777,0,0.50999999,2.900000095,262,,-70,0.067163914,16.60000038,0.840070248,15.19999981,100.1187134,0,0.419999987,1.700000048,237,,-35,0.10883709,17.70000076,0.823177755,15.30000019,100.0894012,0,0.560000002,3.700000048,254,,0,0.174047351,18.79999924,0.791112602,15.69999981,100.0600891,0,0.879999995,4.599999905,197,,15,0.15434818,19.39999962,0.758898318,15.89999962,99.97215271,0,1.440000057,6.400000095,186,0.2,30
2016-07-06 03:00:00,0.133396849,16.20000076,0.805308759,15.19999981,100.0161209,0,0.529999971,2.299999952,261,,-70,0.067163914,16.60000038,0.80986625,15,100.1187134,0,0.449999988,1.799999952,237,,-35,0.10883709,17.70000076,0.787179172,15.10000038,100.0747452,0,0.709999979,4.800000191,240,,0,0.175251976,18.5,0.772153199,15.39999962,100.0600891,0,1.090000033,5.599999905,196,,15,0.15434818,19,0.750167012,15.5,99.97215271,0,1.519999981,6,183,,30
2016-07-06 04:00:00,0.132523268,16.10000038,0.848529637,14.5,100.045433,0,0.529999971,2.200000048,262,,-70,0.0666731,16.5,0.84183234,14.39999962,100.1187134,0,0.460000008,1.799999952,231,,-35,0.108380139,17.60000038,0.830346882,14.5,100.0894012,0,0.720000029,5,237,,0,0.176053345,18.29999924,0.825000465,14.60000038,100.0894012,0,1.330000043,6,197,,15,0.154766828,18.70000076,0.806934774,14.60000038,99.98680878,0,1.889999986,9.300000191,193,,30
2016-07-06 05:00:00,0.131210178,16.10000038,0.857668042,14,100.0747452,0,0.589999974,2.5,263,,-70,0.066181891,16.39999962,0.850650191,13.89999962,100.1480179,0,0.469999999,1.700000048,242,,-35,0.108380139,17.5,0.850650191,13.89999962,100.1187134,0,0.660000026,4.400000095,250,,0,0.176853344,18.10000038,0.845147371,14,100.1333694,0,1.120000005,7.099999905,185,,15,0.154766828,18.39999962,0.838047981,13.89999962,100.030777,0,1.700000048,9.5,187,,30
2016-07-06 06:00:00,0.130332962,16,0.891074598,13.30000019,100.1333694,0,0.589999974,2.700000048,271,,-70,0.065690286,16.29999924,0.883718729,13.19999981,100.2066422,0,0.330000013,1.700000048,238,,-35,0.108380139,17.39999962,0.871418536,13.30000019,100.162674,0,0.610000014,2.799999952,264,,0,0.176453516,17.89999962,0.872264266,13.39999962,100.17733,1.831054688,0.920000017,5.300000191,189,,15,0.154766828,18.10000038,0.86393398,13.19999981,100.0747452,1.831054688,1.269999981,6.300000191,179,,30
2016-07-06 07:00:00,0.129454285,15.89999962,0.93968302,12.60000038,100.1480179,5.493164063,0.469999999,1.799999952,270,,-70,0.065690286,16.29999924,0.932061017,12.5,100.2359543,5.493164063,0.200000003,1.299999952,200,,-35,0.108380139,17.29999924,0.932061017,12.5,100.1919861,5.493164063,0.430000007,2.799999952,261,,0,0.175652832,17.70000076,0.907136798,12.80000019,100.2066422,31.12792969,0.829999983,5.599999905,183,,15,0.155185118,17.89999962,0.885842741,12.69999981,100.1040573,32.95898438,1.200000048,6,183,,30
2016-07-06 08:00:00,0.129014403,15.89999962,0.877123773,13.19999981,100.1919861,9.155273438,0.479999989,2.400000095,273,,-70,0.065690286,16.20000076,0.862956583,13.10000038,100.2652664,12.81738281,0.280000001,1.899999976,232,,-35,0.107922807,17.29999924,0.857339025,13.19999981,100.2212982,12.81738281,0.540000021,3.099999905,267,,0,0.176453516,17.5,0.840730846,13.5,100.2212982,56.76269531,0.870000005,5.900000095,186,,15,0.155185118,17.70000076,0.826698184,13.39999962,100.1187134,60.42480469,1.279999971,6,176,,30
2016-07-06 09:00:00,0.12813352,15.80000019,0.883718729,13.19999981,100.2359543,32.95898438,0.560000002,3,284,,-70,0.065690286,16.10000038,0.882870972,13.10000038,100.3092346,36.62109375,0.25,1.899999976,243,,-35,0.107465103,17.20000076,0.864866495,13.30000019,100.2652664,38.45214844,0.50999999,3.200000048,273,,0,0.176053345,17.39999962,0.848125517,13.60000038,100.2652664,144.6533203,0.779999971,5.599999905,154,,15,0.155185118,17.60000038,0.827796519,13.5,100.17733,157.4707031,1.200000048,6.5,173,,30
2016-07-06 10:00:00,0.127692536,15.69999981,0.772463918,14.19999981,100.2506104,172.1191406,0.74000001,3,269,,-70,0.065198295,16.10000038,0.771265686,14.10000038,100.3238907,130.0048828,0.569999993,2.700000048,253,,-35,0.107007027,17.10000038,0.731197417,14.80000019,100.2945786,195.9228516,0.810000002,4.300000191,269,,0,0.177252814,17.5,0.713804483,15.30000019,100.2945786,514.5263672,0.949999988,8.399999619,184,,15,0.155603051,17.60000038,0.710100114,15,100.2066422,494.3847656,1.570000052,8.600000381,180,,30
2016-07-06 11:00:00,0.127251178,15.69999981,0.711376727,15.10000038,100.2945786,86.05957031,0.790000021,2.599999905,275,,-70,0.063719928,16,0.711376727,15.10000038,100.3678589,175.78125,0.560000002,2.200000048,266,,-35,0.107007027,17.10000038,0.686358452,15.39999962,100.3385468,148.3154297,0.870000005,3.799999952,276,,0,0.178050756,17.89999962,0.671503067,16,100.3238907,401.0009766,0.959999979,9.899999619,189,,15,0.156020626,17.89999962,0.662065864,15.69999981,100.2359543,406.4941406,1.429999948,7.699999809,177,,30
2016-07-06 12:00:00,0.12636736,15.69999981,0.712611318,15.19999981,100.3238907,108.0322266,0.680000007,3.400000095,277,,-70,0.062732384,16,0.711376727,15.10000038,100.3971634,73.2421875,0.5,2.5,266,,-35,0.107007027,17.20000076,0.690778494,15.30000019,100.3678589,161.1328125,0.850000024,3.799999952,273,,0,0.178449214,18.39999962,0.674567461,15.80000019,100.3678589,318.6035156,0.899999976,7.699999809,189,,15,0.156020626,18.29999924,0.662065864,15.69999981,100.2799225,331.4208984,1.399999976,7.599999905,180,,30
2016-07-06 13:00:00,0.125482067,15.69999981,0.792260468,15,100.3532028,133.6669922,0.639999986,2.799999952,275,0.05,-70,0.06322635,16,0.79737854,14.89999962,100.4264755,135.4980469,0.460000008,2.099999905,259,,-35,0.107007027,17.29999924,0.774654686,15,100.3825073,78.73535156,0.74000001,3.299999952,272,,0,0.174449235,18.60000038,0.736740708,15.89999962,100.3825073,563.9648438,0.769999981,7.900000095,185,,15,0.156437859,18.60000038,0.719166994,15.80000019,100.2945786,563.9648438,1.220000029,6.300000191,154,,30
2016-07-06 14:00:00,0.124595322,15.69999981,0.674771309,16.79999924,100.3532028,109.8632813,0.730000019,3.099999905,268,,-70,0.062732384,16,0.683398545,16.60000038,100.4411316,104.3701172,0.5,2.400000095,257,,-35,0.106548563,17.29999924,0.659078956,16.79999924,100.4118195,76.90429688,0.779999971,4.400000095,270,,0,0.177252814,18.89999962,0.627549112,17.70000076,100.3971634,521.8505859,0.920000017,8,188,,15,0.156854734,19,0.62050432,17.5,100.3092346,541.9921875,1.590000033,8.399999619,180,,30
2016-07-06 15:00:00,0.124151386,15.69999981,0.723079503,17,100.3825073,153.8085938,0.699999988,2.400000095,274,0.05,-70,0.06322635,16,0.732309937,16.79999924,100.4557877,113.5253906,0.449999988,2.5,259,,-35,0.106548563,17.39999962,0.716617584,16.79999924,100.4264755,82.39746094,0.819999993,3.900000095,274,,0,0.176453516,19.10000038,0.682531118,17.79999924,100.4264755,690.3076172,0.879999995,6.5,192,,15,0.157687426,19.5,0.671299398,17.60000038,100.3385468,703.125,1.25,6.800000191,170,0.2,30
2016-07-06 16:00:00,0.123707086,15.69999981,0.75803113,16.70000076,100.3971634,126.3427734,0.709999979,4.099999905,277,,-70,0.063719928,16.10000038,0.767730415,16.5,100.4850998,95.21484375,0.50999999,2.700000048,268,,-35,0.106548563,17.39999962,0.751736045,16.5,100.4557877,65.91796875,0.829999983,4.5,280,,0,0.174449235,19.29999924,0.715079248,17.39999962,100.4411316,373.5351563,0.75999999,8.399999619,228,0.2,15,0.158103243,20,0.686217189,17.60000038,100.3532028,607.9101563,1.220000029,7.400000095,143,,30
2016-07-06 17:00:00,0.123707086,15.69999981,0.639211655,17.89999962,100.3825073,67.74902344,0.769999981,2.700000048,282,,-70,0.062732384,16.10000038,0.648159027,17.79999924,100.4557877,144.6533203,0.449999988,2.200000048,271,,-35,0.106089734,17.39999962,0.624573231,17.89999962,100.4411316,43.9453125,0.889999986,4.400000095,284,,0,0.176853344,19.29999924,0.609991014,18.39999962,100.4264755,131.8359375,0.779999971,6.5,272,,15,0.158518702,20.39999962,0.572870612,18.89999962,100.3385468,353.3935547,1,7.300000191,134,,30
2016-07-06 18:00:00,0.123707086,15.69999981,0.613786936,17.79999924,100.4264755,51.26953125,0.629999995,2.400000095,281,,-70,0.062732384,16.20000076,0.626546144,17.60000038,100.4997559,56.76269531,0.340000004,1.700000048,264,,-35,0.105630517,17.5,0.606655777,17.60000038,100.4704437,25.63476563,0.709999979,3.099999905,285,,0,0.177252814,19.10000038,0.596411943,18,100.4704437,82.39746094,0.689999998,5.5,10,,15,0.158518702,20.39999962,0.555698872,18.60000038,100.3825073,281.9824219,0.870000005,5.599999905,96,,30
2016-07-06 19:00:00,0.12326242,15.69999981,0.590416849,17.89999962,100.4557877,27.46582031,0.649999976,2.400000095,286,,-70,0.062732384,16.20000076,0.594145775,17.79999924,100.529068,31.12792969,0.379999995,2.799999952,275,,-35,0.105630517,17.5,0.57089895,17.89999962,100.5144119,25.63476563,0.800000012,2.700000048,290,,0,0.177651957,19,0.568582118,18.10000038,100.4997559,82.39746094,0.720000029,5.800000191,17,,15,0.158103243,20.10000038,0.54379046,18.39999962,100.4118195,102.5390625,1.059999943,9.399999619,111,,30
2016-07-06 20:00:00,0.122817382,15.69999981,0.579113483,17.39999962,100.529068,10.98632813,0.649999976,2.5,282,,-70,0.062732384,16.29999924,0.591582954,17.20000076,100.6169968,10.98632813,0.340000004,2.099999905,261,,-35,0.105630517,17.39999962,0.572649837,17.29999924,100.5876923,10.98632813,0.730000019,3.200000048,286,,0,0.177651957,18.79999924,0.575467706,17.5,100.5730362,40.28320313,0.50999999,9,41,,15,0.157687426,19.70000076,0.548487842,17.70000076,100.4850998,51.26953125,0.850000024,5.599999905,92,,30
2016-07-06 21:00:00,0.122371979,15.69999981,0.598635912,16.60000038,100.5876923,1.831054688,0.629999995,2.599999905,280,,-70,0.062732384,16.29999924,0.606301665,16.39999962,100.660965,3.662109375,0.319999993,2,263,,-35,0.105630517,17.39999962,0.591792226,16.5,100.6316528,3.662109375,0.649999976,2.799999952,285,,0,0.177651957,18.5,0.598635912,16.60000038,100.6463089,18.31054688,0.560000002,4,17,,15,0.157271251,19.29999924,0.570155621,16.79999924,100.5437241,21.97265625,0.769999981,4.900000095,98,,30
2016-07-06 22:00:00,0.122371979,15.69999981,0.622790754,15.69999981,100.675621,0,0.529999971,1.899999976,280,,-70,0.062732384,16.29999924,0.640601218,15.39999962,100.7489014,0,0.219999999,1.299999952,254,,-35,0.105630517,17.39999962,0.625139177,15.5,100.7195892,0,0.49000001,3.299999952,282,,0,0.177651957,18.29999924,0.636505365,15.5,100.7195892,0,0.469999999,3.299999952,96,,15,0.156854734,18.89999962,0.605958581,15.69999981,100.6169968,0,0.709999979,4.400000095,124,,30
2016-07-06 23:00:00,0.121926203,15.69999981,0.677695155,14.80000019,100.7342453,0,0.519999981,1.799999952,276,,-70,0.062732384,16.29999924,0.686496735,14.60000038,100.7928696,0,0.270000011,1.5,249,,-35,0.105630517,17.29999924,0.67445296,14.60000038,100.7635574,0,0.569999993,3.099999905,276,,0,0.177651957,18,0.686496735,14.60000038,100.7782135,0,0.460000008,4.800000191,156,,15,0.156437859,18.39999962,0.653916419,14.80000019,100.675621,0,0.74000001,4.800000191,146,,30
2016-07-07 00:00:00,0.121926203,15.69999981,0.724627912,13.89999962,100.7782135,0,0.449999988,1.299999952,277,,-70,0.062732384,16.20000076,0.734106123,13.69999981,100.8368378,0,0.270000011,1.100000024,244,,-35,0.105170928,17.29999924,0.716665447,13.80000019,100.8075256,0,0.439999998,1.799999952,274,,0,0.177651957,17.70000076,0.727722585,13.69999981,100.8075256,0,0.389999986,3.099999905,162,,15,0.156437859,18,0.699423492,13.89999962,100.7049332,0,0.680000007,4.300000191,145,,30
2016-07-07 01:00:00,0.121480055,15.60000038,0.76338464,13.10000038,100.7928696,0,0.50999999,1.399999976,271,,-70,0.062238012,16.10000038,0.766707659,12.89999962,100.8514862,0,0.349999994,1.200000048,247,,-35,0.105170928,17.20000076,0.755027175,13,100.8368378,0,0.469999999,1.700000048,275,,0,0.177651957,17.39999962,0.778512955,12.80000019,100.8514862,0,0.379999995,2.400000095,163,,15,0.156437859,17.60000038,0.748345554,13,100.7489014,0,0.600000024,3.299999952,152,,30
2016-07-07 02:00:00,0.121480055,15.60000038,0.797258496,12.69999981,100.8221817,0,0.360000014,1.100000024,269,,-70,0.062238012,16.10000038,0.806158781,12.39999962,100.8954544,0,0.230000004,0.899999976,214,,-35,0.105170928,17.10000038,0.787073731,12.5,100.8661423,0,0.25999999,1.299999952,273,,0,0.177252814,17.10000038,0.793977916,12.5,100.8661423,0,0.419999987,2.5,160,,15,0.156437859,17.29999924,0.770001769,12.69999981,100.7635574,0,0.649999976,4.599999905,149,,30
2016-07-07 03:00:00,0.121033542,15.5,0.827658594,12,100.8221817,0,0.5,1.200000048,263,,-70,0.062238012,16,0.825951219,11.89999962,100.8954544,0,0.25,0.899999976,221,,-35,0.105170928,17,0.818769038,11.89999962,100.8661423,0,0.430000007,1.399999976,269,,0,0.177252814,16.79999924,0.844205081,11.69999981,100.8514862,0,0.419999987,2.200000048,188,,15,0.156020626,17,0.81695962,11.80000019,100.7489014,0,0.629999995,3,170,,30
2016-07-07 04:00:00,0.121033542,15.5,0.857128561,11.60000038,100.8368378,0,0.360000014,1.299999952,275,,-70,0.062238012,15.89999962,0.861122906,11.39999962,100.9247665,0,0.170000002,0.800000012,201,,-35,0.105170928,16.89999962,0.848067343,11.5,100.8807983,0,0.370000005,1.5,271,,0,0.177252814,16.60000038,0.861122906,11.39999962,100.8807983,0,0.379999995,3.099999905,172,,15,0.156020626,16.70000076,0.846275985,11.39999962,100.7782135,0,0.519999981,3.299999952,141,,30
2016-07-07 05:00:00,0.121033542,15.39999962,0.887657344,11.19999981,100.8807983,0,0.209999993,0.899999976,239,,-70,0.062238012,15.80000019,0.891896605,11,100.9687347,0,0.230000004,0.5,164,,-35,0.105170928,16.79999924,0.890169501,10.89999962,100.9247665,0,0.270000011,1,235,,0,0.177252814,16.29999924,0.882495642,10.89999962,100.9101105,0,0.529999971,2.5,186,,15,0.156020626,16.39999962,0.874821782,10.89999962,100.8221817,0,0.629999995,2.599999905,161,,30
2016-07-07 06:00:00,0.120586656,15.30000019,0.92542398,10.69999981,100.9247665,0,0.360000014,0.800000012,235,,-70,0.062238012,15.69999981,0.915951788,10.60000038,101.0127029,3.662109375,0.25999999,0.600000024,178,,-35,0.105170928,16.70000076,0.870190799,11.5,100.9833908,54.93164063,0.430000007,1.100000024,254,,0,0.177252814,16.10000038,0.883393347,11.39999962,100.9687347,64.08691406,0.660000026,3.099999905,183,,15,0.156020626,16.10000038,0.880134821,11.19999981,100.8807983,42.11425781,0.720000029,3.299999952,167,,30
2016-07-07 07:00:00,0.120586656,15.30000019,0.936212778,10.89999962,100.9687347,9.155273438,0.409999996,1,244,,-70,0.062238012,15.60000038,0.914765716,11,101.0566711,32.95898438,0.270000011,0.699999988,191,,-35,0.105170928,16.60000038,0.819131017,12.80000019,101.027359,186.7675781,0.629999995,1.600000024,272,,0,0.177252814,16,0.811174631,13.19999981,101.027359,199.5849609,0.579999983,2.599999905,214,,15,0.155603051,15.89999962,0.824515164,12.69999981,100.9101105,157.4707031,0.920000017,3.599999905,188,,30
2016-07-07 08:00:00,0.120586656,15.19999981,0.880204201,12.19999981,101.027359,20.14160156,0.49000001,1.600000024,265,,-70,0.062238012,15.5,0.867438257,12.30000019,101.1152878,40.28320313,0.270000011,1.100000024,216,,-35,0.104710966,16.5,0.766284227,14.19999981,101.0566711,197.7539063,0.660000026,2.299999952,278,,0,0.177651957,16.10000038,0.744219959,14.89999962,101.0713272,353.3935547,0.479999989,2.5,225,,15,0.155603051,15.80000019,0.756429076,14.39999962,100.9833908,302.1240234,0.720000029,4.300000191,163,,30
2016-07-07 09:00:00,0.120586656,15.19999981,0.782543838,14,101.0713272,67.74902344,0.50999999,1.700000048,268,,-70,0.062238012,15.5,0.771265686,14.10000038,101.159256,84.22851563,0.409999996,1.200000048,244,,-35,0.104250617,16.5,0.691292286,15.80000019,101.1299438,201.4160156,0.680000007,3.799999952,272,,0,0.178050756,16.60000038,0.662207901,16.60000038,101.1299438,509.0332031,0.629999995,4.699999809,207,,15,0.155603051,15.80000019,0.667229593,16.10000038,101.027359,466.9189453,0.889999986,5,164,,30
2016-07-07 10:00:00,0.121033542,15.10000038,0.683259845,15.60000038,101.1445999,161.1328125,0.550000012,2.400000095,279,,-70,0.062238012,15.39999962,0.686358452,15.39999962,101.2178802,130.0048828,0.360000014,1.700000048,260,,-35,0.103789896,16.60000038,0.634443879,16.5,101.1885681,195.9228516,0.680000007,2.5,281,,0,0.178847328,17.20000076,0.615868509,17.10000038,101.1885681,541.9921875,0.699999988,3.700000048,180,,15,0.155603051,16.10000038,0.612001896,16.79999924,101.0859833,523.6816406,0.870000005,5.5,127,,30
2016-07-07 11:00:00,0.121033542,15.10000038,0.626428485,16.70000076,101.159256,155.6396484,0.50999999,1.700000048,278,,-70,0.062732384,15.39999962,0.618526518,16.89999962,101.2178802,287.4755859,0.330000013,1.799999952,255,,-35,0.104250617,16.89999962,0.589184999,17.39999962,101.1885681,357.0556641,0.709999979,2.700000048,280,,0,0.178847328,17.89999962,0.566245019,18.29999924,101.2032242,633.5449219,0.639999986,4,232,,15,0.156020626,16.89999962,0.561140001,17.89999962,101.1006317,624.3896484,0.889999986,6.5,137,,30
2016-07-07 12:00:00,0.121033542,15.10000038,0.583077133,17.70000076,101.159256,230.7128906,0.550000012,1.899999976,272,,-70,0.062238012,15.39999962,0.588018477,17.70000076,101.2325363,172.1191406,0.340000004,1.399999976,248,,-35,0.103789896,17.10000038,0.557620943,18,101.2032242,404.6630859,0.850000024,2.900000095,275,,0,0.180039614,18.60000038,0.538310826,18.70000076,101.2032242,631.7138672,0.870000005,4.400000095,181,,15,0.156437859,17.70000076,0.530995131,18.5,101.1152878,631.7138672,0.980000019,5.900000095,161,,30
2016-07-07 13:00:00,0.121033542,15.10000038,0.568582118,18.10000038,101.1445999,170.2880859,0.49000001,1.799999952,268,,-70,0.062732384,15.39999962,0.572167575,18,101.2032242,188.5986328,0.280000001,1.600000024,237,,-35,0.103789896,17.29999924,0.549308181,18.10000038,101.1885681,80.56640625,0.680000007,3.200000048,270,,0,0.180436358,19.20000076,0.525030196,19.10000038,101.173912,520.0195313,0.850000024,5.300000191,182,,15,0.157271251,18.5,0.516508937,18.79999924,101.0859833,532.8369141,1.029999971,6.300000191,163,,30
2016-07-07 14:00:00,0.121033542,15.19999981,0.580520093,18.29999924,101.1299438,115.3564453,0.449999988,1.600000024,274,,-70,0.062732384,15.5,0.584175169,18.20000076,101.1885681,91.55273438,0.239999995,1.100000024,241,,-35,0.103789896,17.5,0.557976246,18.39999962,101.173912,64.08691406,0.600000024,3.200000048,272,,0,0.180436358,19.60000038,0.531938434,19.29999924,101.173912,507.2021484,0.810000002,3.599999905,188,,15,0.157687426,19.10000038,0.51726985,19.20000076,101.0713272,534.6679688,0.930000007,5,167,,30
2016-07-07 15:00:00,0.121480055,15.19999981,0.533080518,19.39999962,101.1006317,162.9638672,0.479999989,2.400000095,269,,-70,0.062732384,15.69999981,0.540878594,19.29999924,101.173912,135.4980469,0.280000001,1.399999976,238,,-35,0.103789896,17.5,0.519753516,19.39999962,101.159256,91.55273438,0.639999986,3.5,275,,0,0.180436358,19.60000038,0.485515028,20.5,101.1445999,640.8691406,0.829999983,5.5,197,,15,0.157687426,19.5,0.466033518,20.60000038,101.0566711,675.6591797,0.949999988,6.5,176,,30
2016-07-07 16:00:00,0.121480055,15.30000019,0.519753516,19.39999962,101.0566711,75.07324219,0.449999988,1.899999976,273,,-70,0.062732384,15.80000019,0.522998273,19.29999924,101.1445999,65.91796875,0.239999995,1.200000048,233,,-35,0.103328802,17.60000038,0.501984179,19.39999962,101.1299438,47.60742188,0.540000021,2.700000048,272,,0,0.180832773,19.79999924,0.463468164,20.39999962,101.1152878,390.0146484,0.74000001,4.400000095,174,,15,0.158103243,20,0.438577592,20.70000076,101.027359,492.5537109,0.879999995,5.599999905,131,,30
2016-07-07 17:00:00,0.121480055,15.39999962,0.510154068,19.70000076,101.0420151,84.22851563,0.419999987,1.5,254,,-70,0.062732384,15.89999962,0.523234963,19.70000076,101.1299438,173.9501953,0.25,1.100000024,217,,-35,0.103328802,17.60000038,0.500169218,19.60000038,101.1152878,43.9453125,0.569999993,3.400000095,255,,0,0.180436358,19.60000038,0.467888504,20.10000038,101.0859833,130.0048828,0.850000024,4.699999809,188,,15,0.158103243,20.29999924,0.427920103,21.10000038,101.0127029,510.8642578,0.910000026,4.699999809,160,,30
2016-07-07 18:00:00,0.121480055,15.39999962,0.521091282,19.89999962,101.027359,71.41113281,0.400000006,1.5,262,,-70,0.062732384,15.89999962,0.525397837,19.89999962,101.1006317,80.56640625,0.25,1.5,223,,-35,0.10286732,17.60000038,0.511331975,19.79999924,101.0859833,31.12792969,0.5,4.400000095,266,0.05,0,0.180436358,19.39999962,0.473457932,20.20000076,101.0713272,86.05957031,0.829999983,4.900000095,163,,15,0.157687426,20.5,0.424044311,21.39999962,100.9833908,443.1152344,0.829999983,4.099999905,139,,30
2016-07-07 19:00:00,0.121480055,15.5,0.51771903,19.60000038,101.0127029,29.296875,0.409999996,1.200000048,268,,-70,0.062732384,16,0.539656281,19.60000038,101.1006317,51.26953125,0.209999993,0.899999976,222,,-35,0.102405466,17.60000038,0.520946145,19.5,101.0859833,23.80371094,0.430000007,2.099999905,282,,0,0.180436358,19.20000076,0.510154068,19.70000076,101.0566711,42.11425781,0.579999983,3.299999952,168,0.4,15,0.157271251,20.5,0.457936883,20.29999924,100.9687347,100.7080078,0.639999986,3.599999905,103,,30
2016-07-07 20:00:00,0.121033542,15.5,0.597726524,18.60000038,101.0127029,9.155273438,0.280000001,1.100000024,272,,-70,0.062732384,16.10000038,0.651211679,18.20000076,101.1006317,9.155273438,0.159999996,0.899999976,160,,-35,0.102405466,17.60000038,0.552232683,18.70000076,101.0713272,7.32421875,0.25999999,2.400000095,292,,0,0.180436358,18.89999962,0.532869995,19,101.0713272,27.46582031,0.460000008,2.599999905,27,,15,0.156854734,20.20000076,0.491707802,19.29999924,100.9687347,36.62109375,0.469999999,2.599999905,96,,30
2016-07-07 21:00:00,0.121033542,15.5,0.694274545,17.29999924,101.0420151,0,0.25999999,0.600000024,247,,-70,0.062732384,16.20000076,0.733910024,17.10000038,101.1152878,1.831054688,0.200000003,0.400000006,163,,-35,0.102405466,17.60000038,0.645524621,17.5,101.0859833,1.831054688,0.25999999,0.899999976,266,,0,0.180436358,18.70000076,0.636491299,17.60000038,101.0859833,7.32421875,0.270000011,1.200000048,247,,15,0.156437859,19.79999924,0.594145775,17.79999924,100.9833908,10.98632813,0.280000001,1.399999976,225,,30
2016-07-07 22:00:00,0.121033542,15.5,0.720122457,15.89999962,101.0420151,0,0.310000002,0.600000024,247,,-70,0.062732384,16.20000076,0.723783851,15.69999981,101.1152878,0,0.230000004,0.300000012,179,,-35,0.102405466,17.5,0.702442169,15.80000019,101.0713272,0,0.419999987,1.200000048,254,,0,0.180436358,18.39999962,0.708017111,15.80000019,101.0859833,0,0.409999996,1.200000048,223,,15,0.156020626,19.39999962,0.695730269,15.69999981,100.9687347,0,0.400000006,1.100000024,217,,30
2016-07-07 23:00:00,0.121033542,15.60000038,0.76475364,15.19999981,101.0420151,0,0.379999995,0.699999988,252,,-70,0.062732384,16.20000076,0.758960009,15.19999981,101.1006317,0,0.230000004,0.400000006,193,,-35,0.102405466,17.5,0.729992092,15.19999981,101.0713272,0,0.540000021,0.899999976,270,,0,0.180436358,18.20000076,0.769686282,15.10000038,101.0713272,0,0.479999989,0.800000012,251,,15,0.155603051,19,0.814423144,14.80000019,100.9687347,0,0.449999988,0.800000012,222,,30
2016-07-08 00:00:00,0.121033542,15.5,0.7718274,14.69999981,101.027359,0,0.389999986,0.800000012,251,,-70,0.062732384,16.10000038,0.765844285,14.69999981,101.0859833,0,0.239999995,0.5,196,,-35,0.102405466,17.39999962,0.743086815,14.80000019,101.0566711,0,0.600000024,1,270,,0,0.180039614,18,0.73357451,15,101.0566711,0,0.469999999,0.899999976,264,,15,0.155185118,18.70000076,0.793981314,14.5,100.9540787,0,0.400000006,1.100000024,224,,30
2016-07-08 01:00:00,0.121033542,15.5,0.787920356,14.5,100.9980469,0,0.389999986,0.899999976,257,,-70,0.062732384,16.10000038,0.7757985,14.5,101.0713272,0,0.239999995,0.5,203,,-35,0.102405466,17.29999924,0.757615745,14.5,101.0420151,0,0.479999989,1.100000024,272,,0,0.180039614,17.79999924,0.781859457,14.5,101.0566711,0,0.419999987,1.200000048,246,,15,0.155185118,18.5,0.797182739,14.19999981,100.9394226,0,0.349999994,1.100000024,208,,30
2016-07-08 02:00:00,0.120586656,15.5,0.820188761,13.39999962,100.9833908,0,0.389999986,0.800000012,256,,-70,0.062238012,16,0.813679338,13.39999962,101.0420151,0,0.360000014,0.699999988,215,,-35,0.102405466,17.29999924,0.794151008,13.39999962,101.027359,0,0.5,1.399999976,273,,0,0.179642528,17.60000038,0.837554276,13.19999981,101.0420151,0,0.449999988,1.5,242,,15,0.154766828,18.20000076,0.859749079,12.80000019,100.9101105,0,0.409999996,1.399999976,193,,30
2016-07-08 03:00:00,0.120586656,15.5,0.860864758,12.89999962,100.9540787,0,0.340000004,0.800000012,251,,-70,0.062238012,16,0.847413719,12.89999962,101.027359,0,0.370000005,0.800000012,212,,-35,0.102405466,17.20000076,0.840688229,12.89999962,100.9980469,0,0.5,1.299999952,265,,0,0.179642528,17.29999924,0.866518736,12.80000019,100.9980469,0,0.569999993,1.299999952,239,,15,0.154766828,17.89999962,0.871093035,12.60000038,100.8807983,0,0.49000001,1.200000048,216,,30
2016-07-08 04:00:00,0.120586656,15.39999962,0.871418536,13.30000019,100.9247665,0,0.330000013,0.699999988,256,,-70,0.062238012,15.89999962,0.86393398,13.19999981,100.9980469,0,0.340000004,0.899999976,214,,-35,0.102405466,17.10000038,0.845210433,13.30000019,100.9833908,0,0.519999981,1.299999952,272,,0,0.179642528,17.10000038,0.834263682,13.5,100.9833908,0,0.550000012,1.399999976,270,,15,0.154766828,17.70000076,0.834263682,13.5,100.8807983,0,0.579999983,1.799999952,252,,30
2016-07-08 05:00:00,0.120586656,15.39999962,0.860132337,13.5,100.8807983,0,0.319999993,0.800000012,224,,-70,0.062238012,15.80000019,0.852735937,13.39999962,100.9394226,0,0.49000001,0.899999976,199,,-35,0.102405466,17,0.810708463,13.69999981,100.9247665,0,0.5,2.400000095,240,,0,0.179642528,17,0.777485549,14.10000038,100.9394226,0,0.949999988,2.799999952,221,,15,0.154766828,17.5,0.765045822,14.10000038,100.8221817,0,1.24000001,3.200000048,211,,30
2016-07-08 06:00:00,0.120139405,15.30000019,0.865754783,13.39999962,100.8514862,1.831054688,0.300000012,0.800000012,229,,-70,0.062238012,15.80000019,0.851762474,13.30000019,100.9247665,3.662109375,0.469999999,0.899999976,202,,-35,0.102405466,16.89999962,0.804324925,13.69999981,100.8807983,9.155273438,0.579999983,2.599999905,246,,0,0.180039614,16.89999962,0.777485549,14.10000038,100.8954544,25.63476563,0.970000029,3.5,225,,15,0.15434818,17.29999924,0.776283503,14,100.7928696,23.80371094,1.289999962,3.599999905,212,,30
2016-07-08 07:00:00,0.120139405,15.30000019,0.851407707,14,100.8368378,10.98632813,0.360000014,0.699999988,244,,-70,0.062238012,15.69999981,0.850650191,13.89999962,100.9101105,12.81738281,0.469999999,0.899999976,209,,-35,0.102405466,16.89999962,0.821024776,14.10000038,100.8661423,16.47949219,0.540000021,2.200000048,257,,0,0.179642528,16.70000076,0.781859457,14.5,100.8807983,64.08691406,0.779999971,2.599999905,234,,15,0.15434818,17.10000038,0.7757985,14.5,100.7782135,65.91796875,1.059999943,2.700000048,218,,30
2016-07-08 08:00:00,0.120139405,15.30000019,0.856814981,15,100.8221817,29.296875,0.289999992,0.699999988,232,,-70,0.062732384,15.69999981,0.838724136,14.89999962,100.8954544,32.95898438,0.379999995,0.899999976,197,,-35,0.102405466,16.79999924,0.772153199,15.39999962,100.8514862,47.60742188,0.870000005,3.299999952,218,,0,0.180039614,16.79999924,0.731201291,15.89999962,100.8661423,148.3154297,1.370000005,4.099999905,213,,15,0.15434818,17.10000038,0.720122457,15.89999962,100.7635574,155.6396484,1.570000052,3.5,209,,30
2016-07-08 09:00:00,0.119691774,15.19999981,0.794879854,16.70000076,100.7782135,51.26953125,0.349999994,0.800000012,213,,-70,0.062732384,15.60000038,0.763295233,16.70000076,100.8514862,54.93164063,0.389999986,0.800000012,182,,-35,0.101943232,16.79999924,0.641463876,17.60000038,100.8221817,76.90429688,2.420000076,5,197,,0,0.180436358,16.89999962,0.639211655,17.89999962,100.8221817,241.6992188,2.710000038,4.199999809,208,,15,0.15434818,17.10000038,0.640051842,18,100.7342453,250.8544922,2.24000001,4.300000191,201,,30
2016-07-08 10:00:00,0.119691774,15.19999981,0.723657072,18.5,100.7195892,98.87695313,0.310000002,1,226,,-70,0.062732384,15.60000038,0.69112134,18.60000038,100.8075256,89.72167969,0.340000004,0.899999976,180,,-35,0.101480618,16.79999924,0.595273256,19.39999962,100.7782135,119.0185547,1.879999995,4.699999809,201,,0,0.180436358,17.20000076,0.589331746,19.79999924,100.7635574,364.3798828,2.279999971,5.199999809,207,,15,0.15434818,17.29999924,0.580665112,19.79999924,100.6902771,369.8730469,2.24000001,5.800000191,196,,30
2016-07-08 11:00:00,0.120139405,15.19999981,0.635496676,20.79999924,100.660965,151.9775391,0.330000013,1.299999952,221,,-70,0.062732384,15.60000038,0.599888027,21.10000038,100.7342453,283.8134766,0.340000004,1.100000024,182,,-35,0.101480618,16.79999924,0.528122723,21.70000076,100.7195892,349.7314453,2.109999895,5.900000095,201,,0,0.180436358,17.70000076,0.519147515,22.10000038,100.7049332,589.5996094,2.569999933,5.5,205,,15,0.15434818,17.79999924,0.515385568,22.10000038,100.6316528,580.4443359,2.50999999,5.699999809,195,,30
2016-07-08 12:00:00,0.120139405,15.30000019,0.548269808,22.89999962,100.6316528,195.9228516,0.379999995,1.5,213,,-70,0.062732384,15.69999981,0.541102886,22.89999962,100.7049332,175.78125,0.319999993,1.299999952,184,,-35,0.101017632,16.89999962,0.483269691,23.39999962,100.7049332,324.0966797,1.730000019,5.699999809,207,,0,0.180436358,18.5,0.46612373,24,100.6902771,657.3486328,2.25999999,7,204,,15,0.154766828,18.60000038,0.462185979,23.89999962,100.5876923,655.5175781,2.369999886,6.400000095,196,,30
2016-07-08 13:00:00,0.120139405,15.30000019,0.529838443,24,100.5876923,119.0185547,0.379999995,2,212,,-70,0.062732384,15.69999981,0.516424835,24,100.6463089,170.2880859,0.370000005,1.399999976,177,,-35,0.101017632,17.10000038,0.45179975,24.39999962,100.6463089,97.04589844,1.830000043,6.300000191,205,,0,0.181228831,19.29999924,0.438496083,24.89999962,100.6316528,521.8505859,2.309999943,6.800000191,206,,15,0.155603051,19.60000038,0.435318589,24.89999962,100.5437241,543.8232422,2.440000057,7.300000191,200,,30
2016-07-08 14:00:00,0.119691774,15.39999962,0.566725969,24,100.529068,108.0322266,0.349999994,1.100000024,209,,-70,0.062732384,15.89999962,0.543333113,24.10000038,100.6023483,119.0185547,0.319999993,1.299999952,170,,-35,0.101017632,17.39999962,0.456626624,24.70000076,100.6023483,84.22851563,1.620000005,4.400000095,204,,0,0.181624562,19.79999924,0.443683773,25.29999924,100.5730362,463.2568359,2.079999924,5.099999905,203,,15,0.156020626,20.39999962,0.434375733,25.29999924,100.4997559,503.5400391,2.25,5.5,196,,30
2016-07-08 15:00:00,0.119691774,15.5,0.580529273,23.60000038,100.5144119,71.41113281,0.409999996,1.399999976,196,,-70,0.062732384,16.10000038,0.549613476,23.60000038,100.5730362,69.58007813,0.379999995,1.100000024,172,,-35,0.101017632,17.5,0.464895397,24.39999962,100.5730362,62.25585938,2.00999999,4.900000095,201,,0,0.181624562,20.10000038,0.453907251,24.79999924,100.5583801,274.6582031,2.539999962,5.900000095,208,,15,0.156020626,20.89999962,0.450710744,24.79999924,100.4704437,300.2929688,2.680000067,6.599999905,197,,30
2016-07-08 16:00:00,0.119691774,15.69999981,0.647883236,23.10000038,100.4557877,51.26953125,0.289999992,0.899999976,219,,-70,0.06322635,16.20000076,0.633721888,23.10000038,100.529068,53.10058594,0.25999999,1.100000024,166,,-35,0.101017632,17.60000038,0.519778252,24,100.5144119,51.26953125,0.879999995,4.400000095,219,,0,0.181624562,20.20000076,0.48490116,24.5,100.5144119,208.7402344,1.309999943,5.099999905,211,,15,0.156020626,21.10000038,0.465374917,24.5,100.4118195,230.7128906,1.590000033,5,201,,30
2016-07-08 17:00:00,0.119243778,15.80000019,0.76634258,22.60000038,100.3971634,32.95898438,0.180000007,0.699999988,217,,-70,0.06322635,16.39999962,0.726200819,22.60000038,100.4704437,34.79003906,0.219999999,0.400000006,145,,-35,0.101017632,17.70000076,0.605121374,23.29999924,100.4557877,31.12792969,0.360000014,1.100000024,254,,0,0.181624562,20.29999924,0.556666434,24.10000038,100.4557877,135.4980469,0.449999988,1.799999952,214,,15,0.155603051,21.20000076,0.543441474,24.29999924,100.3678589,150.1464844,0.400000006,2.200000048,192,,30
2016-07-08 18:00:00,0.119243778,15.89999962,0.657195032,22.5,100.3238907,34.79003906,0.300000012,0.800000012,208,,-70,0.06322635,16.5,0.609424829,22.60000038,100.3971634,34.79003906,0.310000002,1.100000024,167,,-35,0.101017632,17.79999924,0.482427686,23.89999962,100.3825073,31.12792969,1.299999952,3.900000095,204,,0,0.181228831,20.29999924,0.46110186,24.29999924,100.3825073,137.3291016,1.889999986,4.300000191,211,,15,0.155185118,21.10000038,0.46110186,24.29999924,100.2945786,157.4707031,1.840000033,4,202,,30
2016-07-08 19:00:00,0.119243778,15.89999962,0.605775595,22.60000038,100.2652664,18.31054688,0.319999993,1,199,,-70,0.06322635,16.60000038,0.55543673,22.89999962,100.3238907,20.14160156,0.340000004,0.800000012,164,,-35,0.100554258,17.79999924,0.468367815,23.79999924,100.3238907,18.31054688,1.340000033,3.400000095,202,,0,0.181228831,20.20000076,0.46612373,24,100.3238907,86.05957031,1.799999952,3.599999905,210,,15,0.155185118,21.10000038,0.462770313,24,100.2212982,97.04589844,1.809999943,4.800000191,200,,30
2016-07-08 20:00:00,0.118795417,16,0.591108382,22.5,100.2212982,10.98632813,0.360000014,1.200000048,200,,-70,0.06322635,16.60000038,0.572750986,22.5,100.2945786,10.98632813,0.319999993,0.899999976,171,,-35,0.100554258,17.89999962,0.490223199,23.39999962,100.2799225,10.98632813,1.029999971,4.099999905,207,,0,0.180832773,20.10000038,0.480911791,23.60000038,100.2799225,51.26953125,1.639999986,3.900000095,211,,15,0.154766828,21,0.480911791,23.60000038,100.1919861,56.76269531,1.730000019,4.199999809,201,,30
2016-07-08 21:00:00,0.114291303,16.10000038,0.840026379,17.70000076,100.3238907,0,0.469999999,1.600000024,245,0.5,-70,0.065198295,16.70000076,0.840367436,17.60000038,100.4118195,0,0.370000005,1.200000048,211,,-35,0.101943232,17.89999962,0.815109074,17.79999924,100.3825073,0,0.939999998,3.200000048,235,0.25,0,0.172032744,19.89999962,0.814872861,17.89999962,100.3825073,3.662109375,1.110000014,4.099999905,216,3.2,15,0.155185118,20.79999924,0.790475488,17.89999962,100.2799225,3.662109375,1.299999952,4,191,3,30
2016-07-08 22:00:00,0.110661156,16.10000038,0.986763954,15.80000019,100.3238907,0,0.219999999,0.800000012,214,,-70,0.066181891,16.70000076,0.982538939,15.60000038,100.4118195,0,0.330000013,0.899999976,180,,-35,0.102405466,17.89999962,0.964464247,15.80000019,100.3825073,0,0.5,2.799999952,232,,0,0.16960384,19.70000076,0.952213347,16,100.3825073,5.493164063,0.879999995,3.700000048,217,,15,0.154766828,20.5,0.930196881,16,100.2799225,5.493164063,1.110000014,3.200000048,209,,30
2016-07-08 23:00:00,0.110661156,16.10000038,1.000222683,15.5,100.3532028,0,0.180000007,0.800000012,244,0.05,-70,0.065690286,16.70000076,0.995219707,15.39999962,100.4264755,0,0.280000001,0.5,155,,-35,0.102405466,17.79999924,0.988856554,15.5,100.3825073,0,0.25999999,1.100000024,255,,0,0.16960384,19.29999924,0.976266623,15.69999981,100.3825073,0,0.430000007,2,216,,15,0.15434818,20.10000038,0.948212981,15.69999981,100.2945786,0,0.730000019,2.299999952,190,,30
2016-07-09 00:00:00,0.110205702,16.10000038,1.005905747,15.5,100.3532028,0,0.200000003,0.800000012,243,,-70,0.065690286,16.70000076,1.001628876,15.30000019,100.4264755,0,0.289999992,0.5,149,,-35,0.102405466,17.79999924,0.994539618,15.5,100.3825073,0,0.289999992,1.299999952,227,,0,0.16960384,19,0.970039189,15.80000019,100.3971634,0,0.600000024,2.5,199,,15,0.15434818,19.70000076,0.942164481,15.80000019,100.2945786,0,0.810000002,2.700000048,181,,30
2016-07-09 01:00:00,0.110205702,16.10000038,1.013877869,15.19999981,100.3825073,0,0.170000002,0.899999976,249,,-70,0.066181891,16.60000038,1.002924562,15.10000038,100.4411316,0,0.239999995,0.699999988,146,,-35,0.102405466,17.70000076,0.984359384,15.30000019,100.4264755,0,0.289999992,1.799999952,234,,0,0.16960384,18.70000076,0.954305112,15.60000038,100.4264755,0,0.660000026,2.400000095,196,,15,0.153929189,19.29999924,0.92015934,15.69999981,100.3385468,0,0.99000001,3.700000048,183,,30
2016-07-09 02:00:00,0.110205702,16,0.986386776,14.89999962,100.4264755,0,0.209999993,1.200000048,253,,-70,0.065690286,16.5,0.987221122,14.69999981,100.4850998,0,0.219999999,0.600000024,150,,-35,0.102405466,17.60000038,0.962760746,14.89999962,100.4557877,0,0.310000002,1.899999976,226,,0,0.16960384,18.5,0.932767689,15.19999981,100.4704437,0,0.680000007,3.099999905,181,,15,0.15350984,19.10000038,0.903768539,15.30000019,100.3678589,0,1.029999971,4.900000095,179,,30
2016-07-09 03:00:00,0.109749876,16,0.981237948,14.69999981,100.4411316,0,0.25,1.399999976,270,,-70,0.065690286,16.5,0.987930954,14.5,100.4997559,0,0.200000003,1,155,,-35,0.102405466,17.5,0.963288486,14.69999981,100.4704437,0,0.270000011,2.200000048,264,,0,0.17041485,18.20000076,0.93295306,15.10000038,100.4850998,0,0.550000012,4.5,180,,15,0.15350984,18.70000076,0.903798282,15.10000038,100.3825073,0,0.860000014,3.200000048,181,,30
2016-07-09 04:00:00,0.109749876,15.89999962,0.986819267,14.80000019,100.4557877,0,0.25,1.299999952,241,,-70,0.065690286,16.39999962,0.987591803,14.60000038,100.5144119,0,0.25,0.899999976,159,,-35,0.102405466,17.39999962,0.956854284,14.89999962,100.4850998,0,0.449999988,2.799999952,223,,0,0.170819849,18,0.932767689,15.19999981,100.4997559,0,0.819999993,3.400000095,192,,15,0.153090134,18.5,0.915460229,15.10000038,100.3971634,0,1.169999957,4.300000191,189,,30
2016-07-09 05:00:00,0.109293669,15.89999962,0.981869996,14.5,100.4557877,0,0.300000012,1.200000048,254,,-70,0.065690286,16.29999924,0.976037502,14.39999962,100.5144119,0,0.239999995,0.899999976,166,,-35,0.102405466,17.39999962,0.963687241,14.5,100.4850998,0,0.370000005,1.700000048,241,,0,0.17122449,17.79999924,0.939261734,14.80000019,100.4997559,0,0.75999999,3.299999952,200,,15,0.153090134,18.29999924,0.915482938,14.80000019,100.3971634,0,1.200000048,4.699999809,187,,30
2016-07-09 06:00:00,0.109293669,15.80000019,0.957482338,14.60000038,100.4704437,0,0.400000006,1.600000024,261,,-70,0.065690286,16.29999924,0.963953078,14.30000019,100.5437241,1.831054688,0.25,1.100000024,188,,-35,0.102405466,17.29999924,0.945504427,14.5,100.5144119,1.831054688,0.409999996,2.5,253,,0,0.172032744,17.60000038,0.927372336,14.80000019,100.5144119,10.98632813,0.730000019,4.199999809,195,,15,0.153090134,18,0.9035936,14.80000019,100.4118195,10.98632813,1.049999952,3.700000048,184,,30
2016-07-09 07:00:00,0.109293669,15.80000019,0.93310678,15,100.5144119,1.831054688,0.419999987,1.399999976,263,,-70,0.065690286,16.20000076,0.933317065,14.80000019,100.5876923,3.662109375,0.25999999,1.100000024,208,,-35,0.101943232,17.20000076,0.927321732,14.89999962,100.5583801,5.493164063,0.419999987,2.400000095,254,,0,0.173242539,17.5,0.903799713,15.19999981,100.5583801,27.46582031,0.610000014,5.199999809,174,,15,0.153090134,17.89999962,0.892136395,15.10000038,100.4557877,29.296875,0.810000002,4.099999905,178,,30
2016-07-09 08:00:00,0.10883709,15.69999981,0.909525037,15.30000019,100.5437241,21.97265625,0.479999989,1.899999976,264,,-70,0.065690286,16.10000038,0.909593284,15.19999981,100.6169968,29.296875,0.349999994,1.299999952,234,,-35,0.101480618,17.10000038,0.864147365,16,100.5730362,65.91796875,0.5,2.799999952,270,,0,0.174850777,17.5,0.847766459,16.29999924,100.5876923,192.2607422,0.670000017,4.400000095,179,,15,0.153090134,17.79999924,0.836771548,16.10000038,100.4850998,177.6123047,0.959999979,4.5,177,,30
2016-07-09 09:00:00,0.10883709,15.69999981,0.836966872,16.29999924,100.5437241,51.26953125,0.529999971,2,273,,-70,0.065198295,16.10000038,0.836884797,16.20000076,100.6169968,54.93164063,0.400000006,1.700000048,255,,-35,0.100554258,17.10000038,0.790050685,16.89999962,100.6023483,91.55273438,0.639999986,4.099999905,276,,0,0.176853344,17.60000038,0.775357723,17.29999924,100.5876923,267.3339844,0.629999995,4.800000191,193,,15,0.153090134,17.79999924,0.759878099,17.20000076,100.4997559,267.3339844,0.949999988,7.199999809,175,0.2,30
2016-07-09 10:00:00,0.109293669,15.69999981,0.815713584,16.5,100.6023483,56.76269531,0.560000002,2.299999952,267,,-70,0.064705901,16.10000038,0.810190737,16.39999962,100.675621,60.42480469,0.400000006,1.700000048,251,,-35,0.100554258,17.10000038,0.789351761,16.60000038,100.6463089,65.91796875,0.75,3.200000048,275,,0,0.177252814,17.89999962,0.769835651,17.10000038,100.6463089,230.7128906,0.660000026,7.699999809,187,,15,0.153090134,17.89999962,0.764062226,16.89999962,100.5583801,245.3613281,1.149999976,6.699999809,168,,30
2016-07-09 11:00:00,0.109293669,15.69999981,0.826376498,16.5,100.675621,54.93164063,0.550000012,2.400000095,284,,-70,0.064213112,16,0.82628727,16.39999962,100.7342453,56.76269531,0.340000004,1.5,257,,-35,0.100090511,17.20000076,0.800143957,16.70000076,100.7049332,54.93164063,0.569999993,2.299999952,276,,0,0.177651957,18.20000076,0.780277491,17.20000076,100.7195892,221.5576172,0.660000026,3.799999952,181,,15,0.153090134,18.20000076,0.774728,17,100.6169968,239.8681641,0.889999986,5.400000095,148,,30
2016-07-09 12:00:00,0.109293669,15.69999981,0.962449729,15,100.7489014,47.60742188,0.360000014,1.200000048,265,0.1,-70,0.064213112,16,0.956854284,14.89999962,100.8075256,53.10058594,0.25999999,1,227,,-35,0.100090511,17.29999924,0.944615006,15.10000038,100.7782135,53.10058594,0.389999986,2.599999905,278,,0,0.17122449,18.39999962,0.926071227,15.60000038,100.7782135,217.8955078,0.50999999,5.5,190,0.2,15,0.153929189,18.39999962,0.915144563,15.39999962,100.6902771,228.8818359,0.620000005,3.799999952,156,,30
2016-07-09 13:00:00,0.109749876,15.69999981,0.867695391,17,100.7489014,100.7080078,0.50999999,2.400000095,274,,-70,0.063719928,16.10000038,0.868016243,16.89999962,99.15144348,161.1328125,0.389999986,1.700000048,250,,-35,0.100090511,17.29999924,0.846819222,17.10000038,100.8075256,73.2421875,0.629999995,2.700000048,277,,0,0.173645124,18.5,0.814872861,17.89999962,100.7928696,421.1425781,0.550000012,6.400000095,216,0.2,15,0.153929189,18.5,0.800378203,17.79999924,100.7049332,441.2841797,0.839999974,5,173,,30
2016-07-09 14:00:00,0.110205702,15.69999981,0.810831606,17.29999924,100.7782135,62.25585938,0.419999987,1.299999952,275,,-70,0.06322635,16.10000038,0.816025794,17.10000038,100.8661423,64.08691406,0.270000011,1.100000024,244,,-35,0.101017632,17.29999924,0.795628488,17.29999924,100.8368378,54.93164063,0.519999981,1.899999976,272,,0,0.176453516,18.89999962,0.766122699,18,100.8221817,239.8681641,0.519999981,3.099999905,193,,15,0.15434818,19,0.741878331,18,100.7342453,269.1650391,0.629999995,3.5,154,,30
2016-07-09 15:00:00,0.110661156,15.69999981,0.728206336,18.39999962,100.7928696,80.56640625,0.529999971,1.700000048,269,,-70,0.062732384,16.10000038,0.732613146,18.20000076,100.8661423,78.73535156,0.330000013,2.099999905,247,,-35,0.100090511,17.29999924,0.709559858,18.5,100.8514862,71.41113281,0.699999988,2.5,273,,0,0.177252814,19.10000038,0.679197788,19.20000076,100.8368378,307.6171875,0.620000005,4.5,186,,15,0.15434818,19.20000076,0.656707823,19.20000076,100.7489014,344.2382813,0.899999976,5.599999905,148,,30
2016-07-09 16:00:00,0.111570932,15.69999981,0.710683763,19.20000076,100.7928696,87.890625,0.469999999,1.600000024,271,,-70,0.062732384,16.20000076,0.719602168,19,100.8661423,86.05957031,0.270000011,1.700000048,239,,-35,0.099626377,17.39999962,0.68392086,19.29999924,100.8514862,69.58007813,0.680000007,2.5,275,,0,0.177651957,19.29999924,0.65483135,20,100.8368378,322.265625,0.629999995,4.5,174,,15,0.15434818,19.39999962,0.625640869,20.20000076,100.7489014,410.15625,0.730000019,5.800000191,128,,30
2016-07-09 17:00:00,0.112479217,15.69999981,0.706185758,19.20000076,100.7928696,49.43847656,0.400000006,1.600000024,279,,-70,0.062732384,16.20000076,0.715127349,19.10000038,100.8807983,53.10058594,0.219999999,1.200000048,242,,-35,0.099626377,17.39999962,0.688390911,19.29999924,100.8514862,42.11425781,0.569999993,2.5,278,,0,0.178449214,19.5,0.654594064,19.89999962,100.8368378,184.9365234,0.629999995,4.400000095,67,,15,0.15434818,19.70000076,0.629522681,20.10000038,100.7635574,234.375,0.800000012,4.900000095,112,,30
2016-07-09 18:00:00,0.112932801,15.69999981,0.723929167,19.60000038,100.7928696,38.45214844,0.319999993,1.200000048,258,,-70,0.062732384,16.29999924,0.728441596,19.5,100.8514862,38.45214844,0.200000003,0.699999988,194,,-35,0.099161871,17.5,0.697646618,19.70000076,100.8368378,32.95898438,0.479999989,2.5,276,,0,0.178449214,19.60000038,0.655536056,20.39999962,100.8368378,137.3291016,0.550000012,3.099999905,175,,15,0.15434818,19.79999924,0.623026133,20.70000076,100.7489014,206.9091797,0.529999971,2.599999905,138,,30
2016-07-09 19:00:00,0.113386005,15.80000019,0.767803609,19.60000038,100.7782135,27.46582031,0.219999999,0.800000012,246,,-70,0.062732384,16.39999962,0.777004361,19.5,100.8368378,32.95898438,0.209999993,0.600000024,159,,-35,0.099161871,17.5,0.706331432,19.79999924,100.8221817,25.63476563,0.409999996,1.600000024,265,,0,0.178449214,19.60000038,0.66806221,20.39999962,100.8221817,91.55273438,0.540000021,2.700000048,155,,15,0.15434818,19.89999962,0.631223857,20.70000076,100.7342453,119.0185547,0.419999987,1.899999976,125,,30
2016-07-09 20:00:00,0.113386005,15.80000019,0.809639752,19.20000076,100.7635574,10.98632813,0.230000004,0.600000024,227,,-70,0.062732384,16.39999962,0.828908861,19,100.8514862,12.81738281,0.230000004,0.400000006,160,,-35,0.099161871,17.5,0.746501803,19.29999924,100.8368378,10.98632813,0.349999994,0.899999976,264,,0,0.178449214,19.5,0.732528925,19.70000076,100.8221817,53.10058594,0.280000001,1.100000024,233,,15,0.15434818,19.79999924,0.714750588,20,100.7342453,69.58007813,0.209999993,0.899999976,206,,30
2016-07-09 21:00:00,0.113386005,15.89999962,0.822337627,18.5,100.7782135,1.831054688,0.25999999,0.5,237,,-70,0.062732384,16.5,0.827954948,18.29999924,100.8661423,1.831054688,0.230000004,0.300000012,173,,-35,0.099161871,17.5,0.780045927,18.5,100.8368378,1.831054688,0.469999999,0.800000012,267,,0,0.178449214,19.29999924,0.760928333,18.79999924,100.8221817,16.47949219,0.330000013,0.600000024,262,,15,0.15434818,19.70000076,0.774981976,18.70000076,100.7342453,21.97265625,0.310000002,0.699999988,256,,30
2016-07-09 22:00:00,0.113386005,15.89999962,0.867348194,17.10000038,100.7635574,0,0.370000005,0.600000024,249,,-70,0.062732384,16.5,0.872860253,17,100.8368378,0,0.239999995,0.400000006,185,,-35,0.099161871,17.5,0.841687024,17.10000038,100.8221817,0,0.550000012,0.800000012,268,0.05,0,0.178050756,19.10000038,0.841237783,17.29999924,100.8221817,0,0.360000014,0.600000024,263,,15,0.153929189,19.60000038,0.857365668,17,100.7342453,0,0.370000005,0.600000024,227,,30
2016-07-09 23:00:00,0.113386005,15.89999962,0.895685494,16.5,100.7635574,0,0.289999992,0.600000024,247,,-70,0.062732384,16.5,0.885022581,16.5,100.8368378,0,0.239999995,0.5,189,,-35,0.099161871,17.5,0.869028211,16.5,100.8075256,0,0.50999999,1,268,,0,0.177651957,18.89999962,0.868577302,16.70000076,100.8221817,0,0.479999989,0.899999976,257,,15,0.153929189,19.29999924,0.89067328,16.39999962,100.7195892,0,0.400000006,0.899999976,230,,30
2016-07-10 00:00:00,0.113386005,15.89999962,0.90209657,16.20000076,100.7489014,0,0.389999986,0.699999988,248,,-70,0.062732384,16.5,0.891227961,16.20000076,100.8221817,0,0.289999992,0.600000024,200,,-35,0.099161871,17.5,0.869365573,16.29999924,100.7928696,0,0.540000021,1.100000024,271,,0,0.177651957,18.70000076,0.874576807,16.39999962,100.8075256,0,0.5,1.100000024,257,,15,0.15350984,19.10000038,0.891462505,16.10000038,100.6902771,0,0.479999989,1.200000048,212,,30
2016-07-10 01:00:00,0.113386005,15.89999962,0.907869816,16.10000038,100.7342453,0,0.300000012,0.699999988,246,,-70,0.062732384,16.39999962,0.897172093,16,100.8075256,0,0.270000011,0.600000024,199,,-35,0.099161871,17.5,0.880524337,16.10000038,100.7635574,0,0.469999999,1.100000024,271,,0,0.177651957,18.5,0.869365573,16.29999924,100.7782135,0,0.49000001,1,257,,15,0.15350984,18.89999962,0.891668022,16,100.675621,0,0.469999999,1.200000048,227,,30
2016-07-10 02:00:00,0.113386005,15.89999962,0.908180356,16,100.7342453,0,0.25,0.800000012,235,,-70,0.062732384,16.39999962,0.897172093,16,100.7928696,0,0.25999999,0.5,181,,-35,0.099161871,17.39999962,0.880524337,16.10000038,100.7635574,0,0.370000005,1.600000024,258,,0,0.177651957,18.39999962,0.853114784,16.39999962,100.7782135,0,0.5,1.600000024,235,,15,0.15350984,18.70000076,0.847766459,16.29999924,100.675621,0,0.649999976,2.099999905,216,,30
2016-07-10 03:00:00,0.112932801,15.89999962,0.919188619,16,100.7195892,0,0.200000003,0.400000006,215,,-70,0.062732384,16.39999962,0.902676225,16,100.7928696,0,0.25999999,0.5,165,,-35,0.099161871,17.29999924,0.864117026,16.10000038,100.7635574,0,0.419999987,1.5,206,,0,0.177651957,18.20000076,0.853166223,16.29999924,100.7782135,0,0.670000017,1.5,209,,15,0.153090134,18.60000038,0.853178859,16.10000038,100.675621,0,0.720000029,1.299999952,200,,30
2016-07-10 04:00:00,0.112932801,15.80000019,0.907869816,16.10000038,100.7342453,0,0.230000004,0.600000024,209,,-70,0.062732384,16.29999924,0.891668022,16,100.8075256,0,0.310000002,0.800000012,174,,-35,0.099161871,17.29999924,0.864117026,16.10000038,100.7635574,0,0.479999989,1.899999976,211,,0,0.177651957,18.10000038,0.858622015,16.20000076,100.7782135,0,0.779999971,1.799999952,211,,15,0.153090134,18.39999962,0.858647943,16.10000038,100.675621,0,0.939999998,2.200000048,198,,30
2016-07-10 05:00:00,0.112932801,15.80000019,0.931014597,15.80000019,100.6902771,0,0.200000003,1.200000048,217,,-70,0.062732384,16.29999924,0.914548635,15.69999981,100.7489014,0,0.289999992,0.800000012,190,,-35,0.099161871,17.29999924,0.886304557,15.89999962,100.7195892,0,0.370000005,1.399999976,220,,0,0.177651957,18,0.874924958,16.20000076,100.7342453,0,0.550000012,2.700000048,212,,15,0.153090134,18.29999924,0.869490683,16.20000076,100.6316528,0,0.639999986,2.799999952,196,,30
2016-07-10 06:00:00,0.112479217,15.80000019,0.923833847,16.20000076,100.6316528,1.831054688,0.189999998,0.400000006,211,,-70,0.062732384,16.20000076,0.90209657,16.20000076,100.7049332,3.662109375,0.25,0.5,165,,-35,0.099161871,17.20000076,0.863519073,16.60000038,100.660965,1.831054688,0.439999998,1.299999952,208,,0,0.177651957,17.89999962,0.863079548,16.79999924,100.675621,16.47949219,0.550000012,1.100000024,216,,15,0.153090134,18.20000076,0.868577302,16.70000076,100.5876923,18.31054688,0.439999998,1,208,,30
2016-07-10 07:00:00,0.112479217,15.80000019,0.910690129,16.70000076,100.6023483,9.155273438,0.209999993,0.5,221,,-70,0.062732384,16.20000076,0.895305037,16.60000038,100.6902771,12.81738281,0.25,0.5,179,,-35,0.099161871,17.20000076,0.846819222,17.10000038,100.660965,23.80371094,0.720000029,2.200000048,206,,0,0.177651957,17.89999962,0.836170077,17.29999924,100.6463089,69.58007813,0.949999988,2.200000048,215,,15,0.153090134,18.10000038,0.85195148,17.10000038,100.5583801,69.58007813,0.75,2.700000048,207,,30
2016-07-10 08:00:00,0.112479217,15.69999981,0.891914785,17.29999924,100.5876923,23.80371094,0.300000012,0.899999976,216,,-70,0.062732384,16.20000076,0.876711667,17.29999924,100.675621,32.95898438,0.340000004,0.899999976,187,,-35,0.099161871,17.20000076,0.765837133,18.60000038,100.6463089,89.72167969,1.450000048,4.300000191,206,,0,0.178050756,17.89999962,0.756316602,18.79999924,100.6316528,173.9501953,1.840000033,4.300000191,210,,15,0.153090134,18.10000038,0.760928333,18.79999924,100.5583801,166.6259766,1.690000057,4.099999905,204,,30
2016-07-10 09:00:00,0.112479217,15.69999981,0.772589564,19.5,100.5730362,76.90429688,0.349999994,1.100000024,222,,-70,0.062732384,16.20000076,0.732111752,19.89999962,100.6316528,73.2421875,0.360000014,1,191,,-35,0.099161871,17.10000038,0.616945684,22,100.6316528,173.9501953,1.440000057,4.5,215,,0,0.178449214,18.10000038,0.605773211,22.29999924,100.6169968,477.9052734,2.140000105,5.099999905,209,,15,0.153090134,18.20000076,0.609375775,22,100.529068,437.6220703,2.339999914,5.599999905,200,,30
2016-07-10 10:00:00,0.112479217,15.69999981,0.678760588,22.60000038,100.529068,234.375,0.349999994,1.299999952,213,,-70,0.062732384,16.20000076,0.668589294,22.39999962,100.6023483,135.4980469,0.360000014,1.200000048,177,,-35,0.098696984,17.20000076,0.57678616,24,100.5876923,238.0371094,1.480000019,5,209,,0,0.178847328,18.70000076,0.566496551,24.29999924,100.5876923,600.5859375,2.24000001,5.699999809,203,,15,0.153090134,18.5,0.570079386,24,100.4997559,567.6269531,2.410000086,6.900000095,198,,30
2016-07-10 11:00:00,0.112479217,15.80000019,0.628093421,24.5,100.5144119,139.1601563,0.439999998,1.899999976,236,,-70,0.06322635,16.20000076,0.621112347,24.60000038,100.5876923,355.2246094,0.300000012,1.299999952,192,,-35,0.098696984,17.5,0.564688444,25.29999924,100.5876923,454.1015625,1.110000014,4.199999809,227,,0,0.179245099,19.60000038,0.544440091,26.10000038,100.5730362,717.7734375,1.519999981,5.400000095,208,,15,0.153929189,19.20000076,0.545159221,25.79999924,100.4850998,693.9697266,1.919999957,6.199999809,197,,30
2016-07-10 12:00:00,0.112025261,15.80000019,0.621119201,25.20000076,100.4850998,208.7402344,0.370000005,1.5,237,,-70,0.06322635,16.20000076,0.61175561,25.20000076,100.5583801,131.8359375,0.319999993,1.700000048,178,,-35,0.098696984,17.79999924,0.551183045,25.79999924,100.5583801,371.7041016,1.25,5.400000095,217,,0,0.180436358,20.60000038,0.529064357,26.39999962,100.5437241,571.2890625,1.74000001,7.699999809,200,,15,0.15434818,20.20000076,0.523582697,26.20000076,100.4411316,576.7822266,2.24000001,9,197,,30
2016-07-10 13:00:00,0.112025261,15.89999962,0.663166821,24.60000038,100.4704437,89.72167969,0.340000004,1.399999976,242,,-70,0.06322635,16.39999962,0.66063714,24.5,100.5437241,89.72167969,0.25,1,174,,-35,0.098696984,18.10000038,0.592612624,25.29999924,100.5437241,82.39746094,0.819999993,4.099999905,231,,0,0.180436358,21.29999924,0.556275785,26.10000038,100.529068,404.6630859,1.070000052,4.400000095,207,,15,0.154766828,21.10000038,0.544440091,26.10000038,100.4264755,422.9736328,1.309999943,5.400000095,196,,30
2016-07-10 14:00:00,0.112025261,16.10000038,0.639295876,25.70000076,100.4264755,102.5390625,0.370000005,1.299999952,195,,-70,0.063719928,16.5,0.64005214,25.60000038,100.4997559,115.3564453,0.379999995,1.200000048,158,,-35,0.098696984,18.29999924,0.552665114,26.29999924,100.4850998,73.2421875,1.610000014,6.5,204,,0,0.180436358,21.5,0.527242601,27.10000038,100.4850998,481.5673828,1.850000024,6.699999809,205,,15,0.154766828,21.5,0.521663308,27.10000038,100.3971634,512.6953125,2.019999981,6.800000191,197,,30
2016-07-10 15:00:00,0.112025261,16.10000038,0.586066306,26.60000038,100.3825073,122.6806641,0.370000005,1.399999976,165,,-70,0.063719928,16.70000076,0.586640358,26.5,100.4411316,98.87695313,0.340000004,1,168,,-35,0.098696984,18.5,0.510704696,27,100.4411316,73.2421875,1.659999967,6.099999905,201,,0,0.180436358,21.70000076,0.492879808,27.70000076,100.4264755,498.046875,2.079999924,6.400000095,202,,15,0.154766828,22,0.487331897,27.79999924,100.3532028,549.3164063,2.24000001,6.300000191,196,,30
2016-07-10 16:00:00,0.111570932,16.29999924,0.60686934,26.5,100.3238907,113.5253906,0.289999992,1.899999976,190,,-70,0.064213112,16.89999962,0.595924139,26.39999962,100.3825073,80.56640625,0.319999993,1.100000024,175,,-35,0.098696984,18.60000038,0.496425241,27.20000076,100.3825073,47.60742188,1.379999995,5.199999809,204,,0,0.180436358,21.79999924,0.471185684,27.89999962,100.3678589,329.5898438,1.75999999,4.900000095,204,,15,0.155185118,22.60000038,0.457787931,28.20000076,100.2945786,510.8642578,1.980000019,6.800000191,200,,30
2016-07-10 17:00:00,0.111570932,16.39999962,0.563497066,27.60000038,100.2652664,106.2011719,0.379999995,1.5,174,,-70,0.064213112,17.10000038,0.529317319,28,100.3092346,214.2333984,0.409999996,1.299999952,167,,-35,0.09823171,18.60000038,0.47871536,28.20000076,100.3238907,45.77636719,1.970000029,6.199999809,199,,0,0.180436358,21.79999924,0.462320298,28.79999924,100.3238907,144.6533203,2.039999962,6.099999905,203,,15,0.155185118,23,0.436503172,29.70000076,100.2359543,600.5859375,2.24000001,6.5,194,,30
2016-07-10 18:00:00,0.111570932,16.5,0.521377563,28,100.2212982,56.76269531,0.370000005,1.299999952,163,,-70,0.064213112,17.20000076,0.48634091,28.29999924,100.2506104,69.58007813,0.439999998,1.5,164,,-35,0.09823171,18.70000076,0.42947787,28.79999924,100.2506104,32.95898438,2.140000105,6,198,,0,0.180436358,21.60000038,0.427049577,29.10000038,100.2506104,108.0322266,2.349999905,5.099999905,207,,15,0.155185118,23.5,0.4101789,30,100.162674,421.1425781,2.299999952,6,198,,30
2016-07-10 19:00:00,0.111570932,16.60000038,0.516440809,27.89999962,100.1333694,40.28320313,0.330000013,1.399999976,189,,-70,0.064213112,17.39999962,0.478538632,28.29999924,100.17733,43.9453125,0.389999986,1.899999976,170,,-35,0.09823171,18.70000076,0.402221113,29.10000038,100.17733,31.12792969,1.779999971,6.199999809,200,,0,0.180436358,21.39999962,0.400054157,29.29999924,100.1919861,98.87695313,2.349999905,6,207,,15,0.154766828,23.79999924,0.393191963,29.60000038,100.0894012,195.9228516,2.430000067,6.5,202,,30
2016-07-10 20:00:00,0.11111623,16.70000076,0.533153236,27,100.1040573,12.81738281,0.340000004,1.100000024,166,,-70,0.064213112,17.5,0.493381977,27.39999962,100.1480179,14.6484375,0.370000005,0.899999976,175,,-35,0.09823171,18.70000076,0.431876838,28.5,100.162674,12.81738281,1.75999999,5.099999905,200,,0,0.180436358,21.39999962,0.434447557,28.5,100.162674,42.11425781,2.150000095,5.300000191,212,,15,0.154766828,23.70000076,0.442150474,28.39999962,100.0600891,58.59375,2.029999971,5,204,,30
2016-07-10 21:00:00,0.11111623,16.79999924,0.563549936,25.70000076,100.0747452,0,0.330000013,0.800000012,173,,-70,0.064213112,17.60000038,0.547927499,25.89999962,100.1333694,1.831054688,0.340000004,0.600000024,161,,-35,0.09823171,18.79999924,0.496945113,26.70000076,100.1333694,1.831054688,1.330000043,3,202,,0,0.180436358,21.20000076,0.508498728,26.60000038,100.1333694,12.81738281,1.700000048,3.400000095,212,,15,0.15434818,23.5,0.529645562,26.10000038,100.045433,16.47949219,1.519999981,3.900000095,203,,30
2016-07-10 22:00:00,0.11111623,16.89999962,0.637147546,24,100.0747452,0,0.360000014,0.800000012,197,,-70,0.064213112,17.70000076,0.641918004,23.70000076,100.1333694,0,0.280000001,0.5,156,,-35,0.097766064,18.79999924,0.61399889,23.89999962,100.1333694,0,0.449999988,1.799999952,235,,0,0.180436358,21,0.61032027,24,100.1187134,0,0.899999976,1.899999976,214,,15,0.15434818,23.10000038,0.639723897,23.39999962,100.0161209,0,0.860000014,1.600000024,197,,30
2016-07-10 23:00:00,0.110661156,16.89999962,0.710925579,22.70000076,100.030777,0,0.349999994,0.899999976,201,,-70,0.064213112,17.70000076,0.717265189,22.29999924,100.1040573,0,0.270000011,0.5,165,,-35,0.09823171,18.70000076,0.675977051,22.39999962,100.0894012,0,0.460000008,1.600000024,244,,0,0.180039614,20.79999924,0.664538026,22.5,100.0894012,0,0.920000017,2.700000048,218,,15,0.153929189,22.79999924,0.688859582,22,99.98680878,0,0.910000026,1.899999976,200,,30
2016-07-11 00:00:00,0.110661156,16.89999962,0.720308363,21.79999924,100.0014648,0,0.340000004,0.699999988,209,,-70,0.064213112,17.70000076,0.725289881,21.60000038,100.0600891,0,0.289999992,0.600000024,172,,-35,0.09823171,18.70000076,0.642268062,22.60000038,100.045433,0,0.720000029,2.200000048,221,,0,0.180039614,20.60000038,0.619758546,23,100.045433,0,1.360000014,3.299999952,221,,15,0.15350984,22.39999962,0.669934869,22,99.94284058,0,1.210000038,2.599999905,207,,30
2016-07-11 01:00:00,0.110661156,16.89999962,0.764540315,21,99.94284058,0,0.360000014,0.899999976,213,,-70,0.064213112,17.70000076,0.752468646,21,100.0014648,0,0.310000002,0.800000012,181,,-35,0.09823171,18.70000076,0.669625044,22.10000038,99.98680878,0,0.779999971,2.799999952,225,,0,0.179642528,20.29999924,0.638382137,22.70000076,100.0014648,0,1.429999948,3,223,,15,0.153090134,22,0.669625044,22.10000038,99.89888,0,1.320000052,2.900000095,214,,30
2016-07-11 02:00:00,0.110205702,16.89999962,0.795968771,20.60000038,99.86956787,0,0.349999994,0.800000012,216,,-70,0.064213112,17.70000076,0.779471993,20.60000038,99.94284058,0,0.330000013,0.699999988,183,,-35,0.097766064,18.60000038,0.714593172,21.39999962,99.92818451,0,0.709999979,2.400000095,237,,0,0.179642528,20.10000038,0.689267099,21.89999962,99.92818451,0,1.320000052,3.099999905,222,,15,0.153090134,21.70000076,0.710230172,21.5,99.84025574,0,1.269999981,2.700000048,210,,30
2016-07-11 03:00:00,0.110205702,16.89999962,0.820931613,20.10000038,99.82559967,0,0.349999994,0.699999988,217,,-70,0.064213112,17.60000038,0.798960268,20.20000076,99.89888,0,0.349999994,0.800000012,186,,-35,0.097766064,18.60000038,0.753633857,20.79999924,99.88422394,0,0.709999979,2.200000048,250,,0,0.179245099,20,0.718034923,21.5,99.88422394,0,1.179999948,2.799999952,230,,15,0.152670071,21.39999962,0.722445846,21.39999962,99.79628754,0,1.279999971,3.200000048,217,,30
2016-07-11 04:00:00,0.110205702,16.89999962,0.831162155,19.89999962,99.78163147,0,0.400000006,0.899999976,239,,-70,0.064213112,17.60000038,0.8189978,19.79999924,99.8549118,0,0.319999993,0.600000024,200,,-35,0.097766064,18.5,0.791156888,20.10000038,99.84025574,0,0.730000019,1.5,268,,0,0.179245099,19.79999924,0.771223605,20.60000038,99.84025574,0,0.810000002,2.5,246,,15,0.152670071,21.20000076,0.76709944,20.60000038,99.73766327,0,0.889999986,3.799999952,231,,30
2016-07-11 05:00:00,0.110205702,16.89999962,0.842390299,19.60000038,99.7669754,0,0.300000012,0.800000012,224,,-70,0.064213112,17.5,0.83439678,19.5,99.82559967,0,0.310000002,0.5,186,,-35,0.097766064,18.39999962,0.805997849,19.79999924,99.8109436,0,0.639999986,1.5,261,,0,0.178847328,19.70000076,0.804629385,20,99.8109436,0,0.819999993,2.200000048,225,,15,0.152249649,21,0.791156888,20.10000038,99.70835114,0,0.860000014,3.299999952,216,,30
2016-07-11 06:00:00,0.109749876,16.89999962,0.86625582,19.39999962,99.7669754,0,0.25999999,0.600000024,217,,-70,0.064213112,17.5,0.853783548,19.29999924,99.82559967,1.831054688,0.270000011,0.5,167,,-35,0.097766064,18.39999962,0.813935995,19.89999962,99.8109436,7.32421875,0.589999974,2.099999905,230,,0,0.178847328,19.5,0.803917527,20.10000038,99.8109436,21.97265625,1.129999995,2.200000048,212,,15,0.152249649,20.79999924,0.814664483,19.79999924,99.70835114,18.31054688,1,2.400000095,206,,30
2016-07-11 07:00:00,0.109749876,16.79999924,0.875330985,19.79999924,99.78163147,10.98632813,0.209999993,0.5,218,,-70,0.064213112,17.39999962,0.862331033,19.79999924,99.8549118,10.98632813,0.270000011,0.400000006,162,,-35,0.097766064,18.29999924,0.800892293,20.5,99.82559967,16.47949219,0.720000029,2,213,,0,0.178847328,19.39999962,0.800092936,20.60000038,99.82559967,64.08691406,1.110000014,2.099999905,209,,15,0.152249649,20.60000038,0.791844547,20.60000038,99.73766327,62.25585938,0.930000007,2.200000048,194,,30
2016-07-11 08:00:00,0.109749876,16.79999924,0.847328901,20.79999924,99.8109436,23.80371094,0.25999999,0.5,215,,-70,0.064213112,17.39999962,0.829985619,20.89999962,99.88422394,31.12792969,0.280000001,0.5,167,,-35,0.097766064,18.29999924,0.75614965,22.10000038,99.86956787,87.890625,0.790000021,2.200000048,220,,0,0.178847328,19.39999962,0.73796761,22.5,99.8549118,181.2744141,1.129999995,2.599999905,208,,15,0.152249649,20.60000038,0.735078871,22.39999962,99.78163147,166.6259766,1.139999986,3,190,,30
2016-07-11 09:00:00,0.109293669,16.79999924,0.81017524,22.29999924,99.8109436,49.43847656,0.239999995,0.899999976,234,,-70,0.064213112,17.29999924,0.780939579,22.60000038,99.89888,64.08691406,0.239999995,0.699999988,170,,-35,0.097766064,18.29999924,0.676106691,24.60000038,99.86956787,130.0048828,0.649999976,2.200000048,252,,0,0.179245099,19.70000076,0.645358264,25.29999924,99.86956787,399.1699219,0.910000026,2.900000095,209,,15,0.152249649,20.60000038,0.640528381,25.10000038,99.79628754,366.2109375,1.100000024,3.900000095,192,,30
2016-07-11 10:00:00,0.109293669,16.79999924,0.729639649,25,99.82559967,153.8085938,0.25999999,1.399999976,219,,-70,0.064213112,17.29999924,0.721294284,24.89999962,99.89888,108.0322266,0.25999999,0.899999976,159,,-35,0.09730003,18.39999962,0.631617248,26.29999924,99.88422394,175.78125,0.709999979,3.099999905,245,,0,0.179642528,20.20000076,0.593491614,27.20000076,99.88422394,487.0605469,0.75,2.700000048,200,,15,0.152249649,20.89999962,0.585825086,27.10000038,99.79628754,476.0742188,0.980000019,3.799999952,191,,30
2016-07-11 11:00:00,0.109293669,16.79999924,0.727575839,25.89999962,99.8549118,89.72167969,0.25999999,1.200000048,227,,-70,0.064213112,17.29999924,0.712605178,25.89999962,99.89888,120.8496094,0.280000001,1,176,,-35,0.096833624,18.5,0.633152843,26.79999924,99.89888,148.3154297,0.819999993,3.200000048,227,,0,0.180039614,20.89999962,0.589082479,27.79999924,99.91352844,393.6767578,0.910000026,3.400000095,205,,15,0.152670071,21.5,0.581759751,27.70000076,99.82559967,408.3251953,1.190000057,3.799999952,196,,30
2016-07-11 12:00:00,0.10883709,16.79999924,0.676873505,26.70000076,99.88422394,151.9775391,0.370000005,1.299999952,248,,-70,0.064705901,17.39999962,0.672902346,26.79999924,99.92818451,157.4707031,0.280000001,1.700000048,211,,-35,0.09730003,18.79999924,0.601424754,27.60000038,99.92818451,307.6171875,0.939999998,3.900000095,224,,0,0.180436358,21.5,0.56884855,28.39999962,99.92818451,545.6542969,1.179999948,4.699999809,202,,15,0.153090134,22.20000076,0.564363539,28.29999924,99.84025574,545.6542969,1.330000043,5.300000191,198,,30
2016-07-11 13:00:00,0.10883709,16.89999962,0.622209489,27.39999962,99.89888,170.2880859,0.409999996,1.899999976,249,,-70,0.064705901,17.5,0.625865042,27.29999924,99.94284058,161.1328125,0.349999994,1.399999976,239,,-35,0.096833624,19,0.578371882,27.79999924,99.94284058,102.5390625,0.790000021,5.199999809,256,,0,0.180436358,22.10000038,0.54253751,28.89999962,99.94284058,655.5175781,0.970000029,8.199999809,196,,15,0.15350984,23,0.529978752,28.89999962,99.8549118,677.4902344,1.049999952,6.699999809,187,,30
2016-07-11 14:00:00,0.10883709,17,0.575694263,27.79999924,99.91352844,155.6396484,0.400000006,1.899999976,270,,-70,0.065198295,17.60000038,0.581759751,27.70000076,99.95749664,137.3291016,0.319999993,1.399999976,246,,-35,0.096833624,19.10000038,0.533649921,28.20000076,99.97215271,87.890625,0.819999993,3.400000095,250,,0,0.180436358,22.60000038,0.492919475,29.39999962,99.95749664,706.7871094,1.100000024,6.199999809,200,,15,0.153929189,23.89999962,0.485955328,29.29999924,99.88422394,734.2529297,1.450000048,7.099999905,193,,30
2016-07-11 15:00:00,0.10883709,17.10000038,0.567020059,27.89999962,99.91352844,120.8496094,0.360000014,1.399999976,259,,-70,0.065690286,17.79999924,0.567020059,27.89999962,99.95749664,97.04589844,0.289999992,1.200000048,237,,-35,0.096833624,19.29999924,0.528872907,28.10000038,99.97215271,76.90429688,0.629999995,3.700000048,269,,0,0.180832773,23.10000038,0.493707329,29.20000076,99.95749664,455.9326172,0.720000029,5.400000095,187,,15,0.153929189,24.70000076,0.473397911,29.39999962,99.86956787,501.7089844,1.059999943,4.599999905,185,,30
2016-07-11 16:00:00,0.108380139,17.20000076,0.576237023,27.29999924,99.89888,89.72167969,0.310000002,1.700000048,259,,-70,0.065690286,18,0.582398295,27.20000076,99.95749664,84.22851563,0.289999992,1.799999952,236,,-35,0.096833624,19.39999962,0.535973132,27.70000076,99.94284058,67.74902344,0.579999983,3.5,252,,0,0.180832773,23.29999924,0.492959589,28.70000076,99.94284058,327.7587891,0.899999976,5.5,193,,15,0.153929189,25.29999924,0.471980214,29,99.8549118,415.6494141,1.24000001,7.199999809,192,,30
2016-07-11 17:00:00,0.108380139,17.29999924,0.585825086,27.10000038,99.86956787,75.07324219,0.300000012,1.700000048,258,,-70,0.065690286,18.10000038,0.589274645,27,99.92818451,95.21484375,0.25999999,1.100000024,238,,-35,0.096833624,19.5,0.548202217,27.39999962,99.91352844,54.93164063,0.5,4,265,,0,0.180832773,23.5,0.507146955,28.29999924,99.92818451,219.7265625,0.589999974,4.800000191,203,,15,0.153929189,25.5,0.477713406,28.70000076,99.84025574,358.8867188,0.899999976,6.099999905,185,,30
2016-07-11 18:00:00,0.108380139,17.39999962,0.598199785,26.5,99.89888,42.11425781,0.289999992,1.5,281,,-70,0.065690286,18.29999924,0.619920671,26.29999924,99.94284058,40.28320313,0.219999999,1,246,,-35,0.096833624,19.60000038,0.565010846,26.79999924,99.92818451,34.79003906,0.449999988,2.5,284,,0,0.180436358,23.5,0.53997916,27.39999962,99.94284058,144.6533203,0.479999989,4.400000095,227,,15,0.153929189,25.60000038,0.502851427,28,99.84025574,234.375,0.639999986,3.700000048,139,,30
2016-07-11 19:00:00,0.107922807,17.5,0.596361995,25.79999924,99.89888,27.46582031,0.270000011,1.299999952,273,,-70,0.065690286,18.39999962,0.610137463,25.5,99.95749664,27.46582031,0.189999998,0.899999976,216,,-35,0.096833624,19.60000038,0.577868879,25.89999962,99.94284058,23.80371094,0.449999988,1.5,283,,0,0.180436358,23.39999962,0.551962078,26.5,99.94284058,106.2011719,0.430000007,4.300000191,220,,15,0.15350984,25.60000038,0.525505185,26.70000076,99.8549118,130.0048828,0.600000024,3.900000095,139,,30
2016-07-11 20:00:00,0.107922807,17.5,0.639306009,24.79999924,99.91352844,14.6484375,0.209999993,0.800000012,260,,-70,0.065690286,18.39999962,0.65022701,24.60000038,100.0014648,16.47949219,0.180000007,0.800000012,156,,-35,0.096833624,19.60000038,0.59697789,25,99.98680878,14.6484375,0.330000013,1.399999976,274,,0,0.180436358,23.20000076,0.57676208,25.39999962,99.97215271,64.08691406,0.379999995,3,190,,15,0.153090134,25.29999924,0.551663995,25.60000038,99.89888,82.39746094,0.469999999,3.099999905,163,,30
2016-07-11 21:00:00,0.107465103,17.5,0.682891488,23.70000076,99.97215271,0,0.239999995,0.699999988,251,,-70,0.065690286,18.39999962,0.708449602,23.5,100.045433,1.831054688,0.170000002,0.400000006,151,,-35,0.096833624,19.60000038,0.661824107,23.79999924,100.030777,0,0.270000011,0.800000012,275,,0,0.180436358,23,0.639999747,24.10000038,100.0161209,10.98632813,0.300000012,1.5,200,,15,0.152670071,25,0.606350601,24.20000076,99.92818451,10.98632813,0.379999995,2,96,,30
2016-07-11 22:00:00,0.107465103,17.60000038,0.684996068,22.79999924,100.0161209,0,0.25999999,1,248,,-70,0.065690286,18.39999962,0.704924285,22.5,100.0894012,0,0.180000007,0.600000024,167,,-35,0.096833624,19.60000038,0.659759402,22.79999924,100.0747452,0,0.300000012,1.100000024,268,,0,0.180436358,22.70000076,0.652190208,22.89999962,100.0600891,0,0.389999986,2.299999952,191,,15,0.152249649,24.60000038,0.612479806,23.10000038,99.97215271,0,0.449999988,2.5,90,,30
2016-07-11 23:00:00,0.107465103,17.60000038,0.681650877,21.89999962,100.0747452,0,0.189999998,0.600000024,238,,-70,0.065690286,18.39999962,0.678162694,21.79999924,100.1333694,0,0.209999993,0.5,148,,-35,0.096833624,19.60000038,0.616945684,22,100.1187134,0,0.25999999,1.100000024,243,,0,0.180436358,22.39999962,0.605672061,22.10000038,100.1187134,0,0.330000013,1.899999976,201,,15,0.152249649,24.20000076,0.583298266,22.20000076,100.030777,0,0.340000004,2.200000048,106,,30
2016-07-12 00:00:00,0.107007027,17.60000038,0.66811353,20.70000076,100.1187134,0,0.289999992,0.600000024,252,,-70,0.065690286,18.39999962,0.718166888,20.39999962,100.2066422,0,0.189999998,0.400000006,169,,-35,0.096833624,19.39999962,0.688850343,20.5,100.17733,0,0.230000004,0.600000024,254,,0,0.180039614,22.10000038,0.688939154,20.39999962,100.17733,0,0.319999993,0.899999976,200,,15,0.151828885,23.79999924,0.667913854,20.20000076,100.0747452,0,0.280000001,0.899999976,129,,30
2016-07-12 01:00:00,0.107007027,17.5,0.671951115,20,100.1919861,0,0.25,0.5,225,,-70,0.065690286,18.29999924,0.706367195,19.70000076,100.2506104,0,0.239999995,0.5,160,,-35,0.09636683,19.29999924,0.671484828,19.70000076,100.2359543,0,0.319999993,1,220,,0,0.180039614,21.70000076,0.675667167,19.60000038,100.2359543,0,0.579999983,1.399999976,202,,15,0.151407763,23.39999962,0.66663444,19.5,100.1480179,0,0.430000007,0.899999976,180,,30
2016-07-12 02:00:00,0.107007027,17.5,0.705776632,18.89999962,100.1919861,0,0.330000013,0.800000012,248,,-70,0.065198295,18.29999924,0.710199773,18.79999924,100.2652664,0,0.219999999,0.400000006,184,,-35,0.09636683,19.20000076,0.705588102,18.79999924,100.2506104,0,0.330000013,0.800000012,265,,0,0.179642528,21.39999962,0.766035199,18.39999962,100.2506104,0,0.419999987,1.200000048,223,,15,0.150986269,23,0.756554723,18.20000076,100.1480179,0,0.400000006,1.100000024,208,,30
2016-07-12 03:00:00,0.107007027,17.5,0.76119858,17.89999962,100.2066422,0,0.370000005,0.899999976,243,,-70,0.065198295,18.20000076,0.761095822,17.79999924,100.2652664,0,0.270000011,0.400000006,188,,-35,0.09636683,19.10000038,0.731921732,17.89999962,100.2359543,0,0.439999998,1,263,,0,0.179245099,21.10000038,0.751439631,17.89999962,100.2506104,0,0.430000007,0.800000012,240,,15,0.150986269,22.70000076,0.746364951,17.79999924,100.162674,0,0.409999996,0.800000012,227,,30
2016-07-12 04:00:00,0.106548563,17.39999962,0.756185532,17.79999924,100.2066422,0,0.330000013,0.699999988,245,,-70,0.065198295,18.10000038,0.75108242,17.70000076,100.2652664,0,0.25,0.5,191,,-35,0.09636683,19.10000038,0.717283309,17.89999962,100.2212982,0,0.430000007,0.800000012,271,,0,0.179245099,20.89999962,0.708318412,18.10000038,100.2506104,0,0.409999996,0.800000012,259,,15,0.150564432,22.29999924,0.731921732,17.89999962,100.1480179,0,0.430000007,0.800000012,246,,30
2016-07-12 05:00:00,0.106548563,17.29999924,0.75108242,17.70000076,100.1919861,0,0.340000004,0.699999988,248,,-70,0.064705901,18,0.746141076,17.70000076,100.2506104,0,0.230000004,0.400000006,195,,-35,0.09636683,18.89999962,0.72181344,17.79999924,100.2212982,0,0.449999988,0.899999976,274,,0,0.179245099,20.60000038,0.722162783,17.89999962,100.2359543,0,0.439999998,1.200000048,264,,15,0.150564432,22,0.746141076,17.70000076,100.1480179,0,0.400000006,0.899999976,242,,30
2016-07-12 06:00:00,0.106548563,17.29999924,0.770472705,17.39999962,100.1919861,0,0.379999995,0.699999988,252,,-70,0.064705901,17.89999962,0.760401189,17.39999962,100.2506104,1.831054688,0.230000004,0.5,202,,-35,0.09636683,18.89999962,0.740601897,17.5,100.2212982,1.831054688,0.540000021,1.200000048,275,,0,0.179245099,20.39999962,0.71690315,17.79999924,100.2359543,12.81738281,0.529999971,1.399999976,272,,15,0.150564432,21.79999924,0.735943079,17.60000038,100.1480179,12.81738281,0.519999981,1.399999976,261,,30
2016-07-12 07:00:00,0.106089734,17.20000076,0.815794647,17.39999962,100.2212982,5.493164063,0.349999994,0.800000012,247,,-70,0.064705901,17.79999924,0.810758889,17.39999962,100.2799225,7.32421875,0.239999995,0.400000006,188,,-35,0.09636683,18.79999924,0.780634403,17.5,100.2506104,7.32421875,0.469999999,1,268,,0,0.179245099,20.20000076,0.766078055,17.89999962,100.2652664,40.28320313,0.400000006,1,254,,15,0.150564432,21.5,0.770916402,17.79999924,100.17733,42.11425781,0.419999987,1.100000024,239,,30
2016-07-12 08:00:00,0.106089734,17.10000038,0.808921456,18.29999924,100.2652664,10.98632813,0.419999987,0.899999976,252,,-70,0.064705901,17.70000076,0.809506774,18.10000038,100.3238907,12.81738281,0.239999995,0.400000006,195,,-35,0.09636683,18.70000076,0.780371308,18.29999924,100.2945786,10.98632813,0.5,1.100000024,265,,0,0.179245099,20.10000038,0.770341396,18.70000076,100.3092346,60.42480469,0.389999986,1.600000024,237,,15,0.150564432,21.39999962,0.756419539,18.70000076,100.2212982,64.08691406,0.479999989,1.399999976,209,,30
2016-07-12 09:00:00,0.106089734,17.10000038,0.751606286,18.89999962,100.2652664,23.80371094,0.439999998,1,257,,-70,0.064705901,17.70000076,0.756316602,18.79999924,100.3385468,25.63476563,0.239999995,0.5,222,,-35,0.095899656,18.60000038,0.73781997,19,100.3092346,27.46582031,0.569999993,1.299999952,274,,0,0.179245099,20.10000038,0.706367612,19.5,100.3092346,108.0322266,0.400000006,2.5,246,,15,0.150564432,21.29999924,0.69321698,19.60000038,100.2359543,117.1875,0.389999986,2.099999905,168,,30
2016-07-12 10:00:00,0.105630517,17.10000038,0.741870403,19.39999962,100.2945786,38.45214844,0.25,0.699999988,252,,-70,0.064705901,17.60000038,0.737428069,19.39999962,100.3678589,40.28320313,0.189999998,0.600000024,179,,-35,0.095899656,18.5,0.706367195,19.70000076,100.3532028,45.77636719,0.409999996,1.299999952,277,,0,0.179245099,20.20000076,0.667999685,20.29999924,100.3385468,170.2880859,0.50999999,2.900000095,197,,15,0.150564432,21.29999924,0.651360691,20.39999962,100.2652664,183.1054688,0.469999999,3.599999905,153,,30
2016-07-12 11:00:00,0.105630517,17,0.676311255,20.70000076,100.2799225,95.21484375,0.349999994,1.5,251,,-70,0.064705901,17.60000038,0.66811353,20.70000076,100.3532028,131.8359375,0.239999995,0.800000012,201,,-35,0.095899656,18.5,0.620361149,21.39999962,100.3385468,159.3017578,0.540000021,2.400000095,270,,0,0.179245099,20.29999924,0.583474815,22.29999924,100.3238907,430.2978516,0.649999976,3.099999905,170,,15,0.150564432,21.39999962,0.57208097,22.20000076,100.2359543,444.9462891,0.730000019,3.200000048,151,,30
2016-07-12 12:00:00,0.105630517,17,0.620640576,21.70000076,100.2652664,106.2011719,0.300000012,1.100000024,260,,-70,0.065198295,17.5,0.616785705,21.70000076,100.3385468,102.5390625,0.219999999,1.100000024,188,,-35,0.095899656,18.5,0.575820029,22.20000076,100.3238907,139.1601563,0.620000005,2.900000095,250,,0,0.180039614,20.70000076,0.534592211,23.10000038,100.3092346,426.6357422,0.75,3.200000048,195,,15,0.150564432,21.89999962,0.52397114,23.10000038,100.2359543,450.4394531,0.829999983,4.199999809,181,,30
2016-07-12 13:00:00,0.105170928,17,0.541672885,23.10000038,100.2506104,155.6396484,0.409999996,1.799999952,237,,-70,0.065198295,17.60000038,0.54192698,23.20000076,100.3238907,177.6123047,0.319999993,1.399999976,188,,-35,0.095899656,18.60000038,0.494186789,23.5,100.3092346,113.5253906,1.419999957,5.800000191,210,,0,0.180039614,21.29999924,0.462599307,24.60000038,100.3092346,770.8740234,1.730000019,5.199999809,204,,15,0.150986269,22.60000038,0.456129372,24.60000038,100.2212982,781.8603516,1.860000014,6.699999809,200,,30
2016-07-12 14:00:00,0.105170928,17,0.471883684,24.5,100.2506104,144.6533203,0.439999998,1.799999952,219,,-70,0.065690286,17.60000038,0.462599307,24.60000038,100.3092346,162.9638672,0.330000013,1.299999952,183,,-35,0.095899656,18.70000076,0.436085612,24.5,100.3092346,69.58007813,1.269999981,5.400000095,217,,0,0.180436358,21.89999962,0.406610459,25.79999924,100.2945786,833.1298828,1.450000048,5.699999809,205,,15,0.151828885,23.5,0.403598517,25.79999924,100.2066422,845.9472656,1.570000052,6,194,,30
2016-07-12 15:00:00,0.104710966,17.10000038,0.426701427,25.60000038,100.2066422,221.5576172,0.439999998,2,200,,-70,0.065690286,17.70000076,0.426176429,25.5,100.2652664,135.4980469,0.419999987,2,169,,-35,0.095899656,18.70000076,0.38938421,25.5,100.2652664,124.5117188,1.870000005,6.599999905,201,,0,0.180436358,22.39999962,0.367727876,26.60000038,100.2506104,765.3808594,2.25999999,6.699999809,200,,15,0.152249649,24.5,0.364854991,26.60000038,100.17733,814.8193359,2.450000048,6.400000095,195,,30
2016-07-12 16:00:00,0.104710966,17.10000038,0.469069213,24.60000038,100.2066422,75.07324219,0.310000002,1.600000024,239,,-70,0.065690286,17.79999924,0.465374917,24.5,100.2652664,64.08691406,0.25,1.5,189,,-35,0.095899656,18.79999924,0.425786048,24.89999962,100.2652664,58.59375,0.75999999,4.5,238,,0,0.180436358,22.79999924,0.39690882,25.70000076,100.2652664,276.4892578,0.920000017,4.400000095,210,,15,0.152670071,25.39999962,0.382515013,25.79999924,100.162674,335.0830078,1.210000038,5,191,,30
2016-07-12 17:00:00,0.104250617,17.20000076,0.512790263,23.89999962,100.2066422,54.93164063,0.319999993,1.100000024,266,,-70,0.065690286,17.89999962,0.512790263,23.89999962,100.2652664,56.76269531,0.189999998,1.299999952,187,,-35,0.095432103,18.79999924,0.461621493,24.39999962,100.2652664,51.26953125,0.49000001,2.400000095,274,,0,0.180436358,23,0.421362281,25.20000076,100.2506104,210.5712891,0.589999974,2.599999905,213,,15,0.152670071,25.60000038,0.397873312,25.39999962,100.1480179,258.1787109,0.699999988,4.099999905,182,,30
2016-07-12 18:00:00,0.104250617,17.20000076,0.535873175,23.60000038,100.162674,43.9453125,0.280000001,1.200000048,260,,-70,0.065690286,18,0.546024561,23.5,100.2506104,43.9453125,0.170000002,0.600000024,182,,-35,0.095899656,18.89999962,0.486244172,24,100.2359543,40.28320313,0.419999987,1.600000024,279,,0,0.180436358,23,0.450710744,24.79999924,100.2212982,172.1191406,0.409999996,2.799999952,222,,15,0.152249649,25.5,0.416936934,25,100.1187134,208.7402344,0.519999981,2.799999952,165,,30
2016-07-12 19:00:00,0.103789896,17.29999924,0.587702096,23,100.162674,27.46582031,0.230000004,0.800000012,242,,-70,0.065690286,18,0.609073043,23,100.2359543,29.296875,0.170000002,0.5,167,,-35,0.095432103,18.89999962,0.542374611,23.39999962,100.2212982,25.63476563,0.330000013,1.100000024,278,,0,0.180436358,23,0.499999821,24.10000038,100.2066422,109.8632813,0.370000005,1.5,227,,15,0.152249649,25.29999924,0.455073684,24.39999962,100.1187134,131.8359375,0.419999987,2.099999905,173,,30
2016-07-12 20:00:00,0.103789896,17.29999924,0.635344565,22.39999962,100.1919861,5.493164063,0.180000007,0.400000006,226,,-70,0.065690286,18.10000038,0.635645509,22.20000076,100.2506104,7.32421875,0.200000003,0.300000012,157,,-35,0.095432103,18.89999962,0.551036835,22.60000038,100.2359543,5.493164063,0.289999992,0.699999988,265,,0,0.180039614,22.79999924,0.52397114,23.10000038,100.2359543,38.45214844,0.330000013,0.899999976,247,,15,0.151828885,25,0.527511477,23.10000038,100.1480179,42.11425781,0.270000011,1.299999952,236,,30
2016-07-12 21:00:00,0.103789896,17.29999924,0.663788199,21.20000076,100.2066422,0,0.25999999,0.5,251,,-70,0.065690286,18.10000038,0.663876057,21.10000038,100.2799225,1.831054688,0.170000002,0.300000012,180,,-35,0.095432103,18.89999962,0.620065629,21.20000076,100.2652664,0,0.379999995,0.699999988,279,,0,0.180039614,22.60000038,0.589540422,21.60000038,100.2506104,9.155273438,0.439999998,0.800000012,273,,15,0.151828885,24.70000076,0.604866385,21.5,100.1480179,9.155273438,0.25,0.800000012,297,,30
2016-07-12 22:00:00,0.103328802,17.29999924,0.675998211,19.79999924,100.1919861,0,0.370000005,0.699999988,249,,-70,0.065690286,18.10000038,0.680205405,19.70000076,100.2652664,0,0.219999999,0.300000012,190,,-35,0.095432103,18.89999962,0.662998259,19.79999924,100.2359543,0,0.460000008,0.800000012,271,,0,0.179642528,22.29999924,0.684664845,19.79999924,100.2359543,0,0.540000021,1.100000024,239,,15,0.151407763,24.29999924,0.733091593,19.29999924,100.1480179,0,0.370000005,0.899999976,195,,30
2016-07-12 23:00:00,0.103328802,17.29999924,0.710013449,18.70000076,100.1919861,0,0.469999999,0.699999988,256,,-70,0.065690286,18,0.700732231,18.70000076,100.2652664,0,0.230000004,0.400000006,211,,-35,0.095432103,18.79999924,0.682169795,18.70000076,100.2506104,0,0.579999983,0.899999976,280,,0,0.179245099,22,0.656287789,19.10000038,100.2506104,0,0.569999993,1,275,,15,0.150986269,23.79999924,0.696091592,18.70000076,100.1480179,0,0.460000008,0.899999976,265,,30
2016-07-13 00:00:00,0.103328802,17.29999924,0.780736983,17.79999924,100.2212982,0,0.479999989,1,257,,-70,0.065690286,18,0.770916402,17.79999924,100.2799225,0,0.239999995,0.699999988,207,,-35,0.095432103,18.79999924,0.746560156,17.89999962,100.2652664,0,0.529999971,1.100000024,274,,0,0.178847328,21.70000076,0.742047846,18.10000038,100.2652664,0,0.419999987,1.399999976,267,,15,0.150564432,23.39999962,0.751439631,17.89999962,100.17733,0,0.379999995,1.299999952,260,,30
2016-07-13 01:00:00,0.10286732,17.29999924,0.805559278,17.60000038,100.2359543,0,0.230000004,0.800000012,245,,-70,0.065690286,17.89999962,0.785668969,17.60000038,100.2799225,0,0.200000003,0.400000006,165,,-35,0.094964169,18.70000076,0.741680682,17.89999962,100.2652664,0,0.280000001,1.100000024,295,,0,0.178847328,21.29999924,0.737229407,18.10000038,100.2799225,0,0.379999995,2.5,327,,15,0.150564432,23,0.737029433,18,100.17733,0,0.469999999,2.200000048,358,,30
2016-07-13 02:00:00,0.10286732,17.20000076,0.815794647,17.39999962,100.2066422,0,0.239999995,0.5,264,,-70,0.065690286,17.79999924,0.810831606,17.29999924,100.2652664,0,0.150000006,0.400000006,175,,-35,0.094964169,18.60000038,0.790615797,17.39999962,100.2506104,0,0.289999992,0.699999988,288,,0,0.178847328,21.10000038,0.79064256,17.5,100.2506104,0,0.300000012,0.899999976,292,,15,0.150564432,22.60000038,0.795628488,17.29999924,100.162674,0,0.270000011,1,322,,30
2016-07-13 03:00:00,0.102405466,17.20000076,0.842370868,16.5,100.2066422,0,0.360000014,1,261,,-70,0.065690286,17.70000076,0.837018251,16.39999962,100.2945786,0,0.209999993,0.600000024,201,,-35,0.094964169,18.5,0.836966872,16.29999924,100.2652664,0,0.430000007,1,272,,0,0.178847328,20.79999924,0.842366636,16.29999924,100.2506104,0,0.419999987,1.100000024,264,,15,0.150142252,22.29999924,0.85860759,15.89999962,100.1480179,0,0.340000004,1,258,,30
2016-07-13 04:00:00,0.102405466,17.10000038,0.897985578,15.39999962,100.17733,0,0.270000011,0.699999988,261,,-70,0.065690286,17.70000076,0.886499107,15.30000019,100.2799225,0,0.230000004,0.5,191,,-35,0.094964169,18.39999962,0.886305392,15.10000038,100.2359543,0,0.319999993,0.800000012,264,,0,0.178847328,20.5,0.891882658,14.89999962,100.2506104,0,0.319999993,0.899999976,227,,15,0.150142252,21.89999962,0.891704202,14.80000019,100.1480179,0,0.280000001,0.800000012,189,,30
2016-07-13 05:00:00,0.102405466,17.10000038,0.903798282,15.10000038,100.2066422,0,0.300000012,0.800000012,264,,-70,0.065690286,17.60000038,0.897895157,15,100.2945786,0,0.25,0.600000024,224,,-35,0.094964169,18.39999962,0.89778918,14.89999962,100.2506104,0,0.280000001,0.800000012,288,,0,0.178847328,20.20000076,0.915423214,14.69999981,100.2652664,0,0.340000004,0.899999976,280,,15,0.150142252,21.5,0.915035129,14.39999962,100.162674,0,0.280000001,0.800000012,307,,30
2016-07-13 06:00:00,0.102405466,17,0.921291173,15.10000038,100.2212982,1.831054688,0.209999993,0.5,272,,-70,0.065690286,17.5,0.915508687,14.89999962,100.2945786,3.662109375,0.209999993,0.5,214,,-35,0.094964169,18.29999924,0.903763771,15,100.2652664,27.46582031,0.239999995,1,332,,0,0.178847328,19.89999962,0.921406388,14.69999981,100.2652664,43.9453125,0.239999995,1.100000024,36,,15,0.1497197,21.20000076,0.915329039,14.60000038,100.162674,36.62109375,0.280000001,1.200000048,33,,30
2016-07-13 07:00:00,0.101943232,16.89999962,0.925080419,15.89999962,100.2066422,14.6484375,0.119999997,0.400000006,263,,-70,0.065690286,17.39999962,0.908462226,15.89999962,100.3092346,18.31054688,0.159999996,0.5,183,,-35,0.094495848,18.20000076,0.852423131,16.89999962,100.2799225,53.10058594,0.330000013,1.799999952,21,,0,,,,,,,,,,,15,,,,,,,,,,,30
2016-07-13 08:00:00,0.101943232,16.89999962,0.887374461,17.20000076,100.2506104,29.296875,0.119999997,0.800000012,273,,-70,0.065198295,17.29999924,0.872074902,17.20000076,100.3238907,32.95898438,0.200000003,0.800000012,138,,-35,0.094495848,18.10000038,0.814872861,17.89999962,100.2945786,54.93164063,1.419999957,3.200000048,59,,0,,,,,,,,,,,15,,,,,,,,,,,30
2016-07-13 09:00:00,0.101943232,16.79999924,0.784745038,18.5,100.2359543,49.43847656,0.170000002,0.899999976,243,,-70,0.065198295,17.29999924,0.770506859,18.60000038,100.3238907,54.93164063,0.25999999,0.899999976,129,,-35,0.094495848,18.10000038,0.714942575,18.89999962,100.2945786,78.73535156,1.580000043,3.799999952,58,,0,,,,,,,,,,,15,,,,,,,,,,,30
2016-07-13 10:00:00,0.101480618,16.79999924,0.73727119,19.5,100.2506104,130.0048828,0.230000004,1.299999952,248,,-70,0.065690286,17.20000076,0.728316605,19.60000038,100.3385468,84.22851563,0.219999999,1,126,,-35,0.094495848,18.10000038,0.680565059,20.10000038,100.3092346,175.78125,1.539999962,4.5,61,,0,,,,,,,,,,,15,,,,,,,,,,,30
2016-07-13 11:00:00,0.101480618,16.79999924,0.667630196,21.29999924,100.2652664,124.5117188,0.270000011,1,152,,-70,0.065690286,17.20000076,0.647624969,21.70000076,100.3385468,214.2333984,0.379999995,1.200000048,124,,-35,0.094964169,18.10000038,0.616434813,21.39999962,100.3238907,314.9414063,1.620000005,3.5,79,,0,,,,,,,,,,,15,,,,,,,,,,,30
2016-08-19 13:00:00,0.094964169,15.30000019,0.659813464,21.20000076,100.2799225,97.04589844,0.340000004,0.899999976,187,,-70,0.073023044,15.69999981,0.651878297,21.10000038,100.3678589,95.21484375,0.379999995,1,149,,-35,0.091677912,17.10000038,0.604166508,21.20000076,100.3678589,100.7080078,1.25999999,4.099999905,168,,0,0.213670999,19.70000076,0.557773411,22.39999962,100.3532028,613.4033203,1.200000048,3.599999905,151,,15,0.140763521,19.29999924,0.544075727,22.70000076,100.2799225,628.0517578,0.99000001,2.299999952,99,0.4,30
2016-08-19 14:00:00,0.094964169,15.30000019,0.609465837,22.5,100.2652664,214.2333984,0.389999986,1.700000048,241,,-70,0.072536938,15.80000019,0.620730639,22,100.3532028,206.9091797,0.319999993,1,167,,-35,0.091206916,17.29999924,0.579096258,22,100.3532028,65.91796875,0.910000026,5.199999809,209,,0,0.213670999,20.39999962,0.525289416,23.5,100.3385468,659.1796875,0.99000001,4.400000095,184,,15,0.140763521,19.70000076,0.515262663,23.60000038,100.2652664,695.8007813,1.110000014,5,166,,30
2016-08-19 15:00:00,0.094495848,15.39999962,0.562769234,23,100.2506104,164.7949219,0.460000008,1.200000048,267,,-70,0.072050445,15.89999962,0.569770575,22.89999962,100.3238907,117.1875,0.289999992,1.299999952,213,,-35,0.091206916,17.5,0.52397114,23.10000038,100.3238907,49.43847656,0.939999998,4.699999809,228,,0,0.213303134,21.29999924,0.478392422,24.5,100.3238907,635.3759766,1.080000043,5.400000095,197,,15,0.141193599,20.29999924,0.456626624,24.70000076,100.2506104,690.3076172,1.169999957,5,192,,30
2016-08-19 16:00:00,0.094027147,15.5,0.602075517,22.79999924,100.2212982,91.55273438,0.280000001,1,243,,-70,0.072050445,16.10000038,0.598477066,22.60000038,100.3092346,89.72167969,0.280000001,1,142,,-35,0.091206916,17.5,0.505779982,23,100.3092346,34.79003906,0.779999971,2.599999905,168,,0,0.213303134,22.10000038,0.460561395,24.20000076,100.2945786,303.9550781,0.850000024,3.099999905,169,,15,0.141193599,20.79999924,0.432730019,25,100.2212982,536.4990234,1.00999999,4.5,146,,30
2016-08-19 17:00:00,0.094027147,15.60000038,0.562914968,23.10000038,100.2066422,49.43847656,0.330000013,1.299999952,253,,-70,0.072050445,16.20000076,0.580520928,22.89999962,100.2945786,53.10058594,0.280000001,1.100000024,158,,-35,0.091206916,17.60000038,0.480911791,23.60000038,100.2945786,32.95898438,0.779999971,4.400000095,215,,0,0.213303134,22.29999924,0.437367648,24.20000076,100.2945786,60.42480469,1.080000043,4.099999905,191,,15,0.141193599,21.20000076,0.385526955,25.79999924,100.2066422,505.3710938,1.120000005,4,203,,30
2016-08-19 18:00:00,0.094027147,15.60000038,0.612772107,22.89999962,100.2066422,43.9453125,0.310000002,1.399999976,231,,-70,0.072050445,16.29999924,0.598477066,22.60000038,100.2799225,32.95898438,0.300000012,1.399999976,166,,-35,0.09073554,17.60000038,0.504130244,23.39999962,100.2945786,34.79003906,0.430000007,2.5,260,,0,0.213303134,22,0.468367815,23.79999924,100.2799225,36.62109375,0.680000007,3,199,,15,0.141193599,21.39999962,0.410619706,25,100.1919861,232.5439453,0.850000024,3.5,199,,30
2016-08-19 19:00:00,0.093558066,15.69999981,0.662836969,21.79999924,100.1919861,10.98632813,0.230000004,0.800000012,213,,-70,0.072050445,16.39999962,0.605488777,21.89999962,100.2799225,9.155273438,0.230000004,0.800000012,151,,-35,0.09073554,17.70000076,0.501128733,22.79999924,100.2799225,7.32421875,0.449999988,1.799999952,240,,0,0.213303134,21.5,0.451978832,23.39999962,100.2799225,25.63476563,0.709999979,2.400000095,211,,15,0.140763521,21.5,0.439690799,23.60000038,100.1919861,32.95898438,0.75,3.299999952,226,,30
2016-08-19 20:00:00,0.093558066,15.80000019,0.784293473,20.5,100.2359543,1.831054688,0.25999999,0.5,250,,-70,0.072050445,16.5,0.725857496,20.60000038,100.3092346,1.831054688,0.159999996,0.400000006,198,,-35,0.09073554,17.70000076,0.624040425,21.20000076,100.3092346,1.831054688,0.50999999,0.800000012,288,,0,0.213303134,21.10000038,0.559388459,21.79999924,100.2945786,12.81738281,0.75,1.299999952,271,,15,0.140763521,21.29999924,0.570526779,21.70000076,100.2066422,14.6484375,0.529999971,1.100000024,305,,30
2016-08-19 21:00:00,0.093558066,15.80000019,0.747023344,18.89999962,100.2652664,0,0.310000002,0.699999988,243,,-70,0.072050445,16.5,0.715047717,19,100.3385468,0,0.230000004,0.5,193,,-35,0.09073554,17.70000076,0.652630329,19.29999924,100.3385468,0,0.639999986,1.600000024,263,,0,0.213303134,20.70000076,0.65339005,19.5,100.3385468,0,0.779999971,1.5,245,,15,0.140333071,21,0.670201778,19.20000076,100.2506104,0,0.550000012,1.200000048,250,,30
2016-08-19 22:00:00,0.093558066,15.89999962,0.785668969,17.60000038,100.2799225,0,0.200000003,0.5,248,,-70,0.072536938,16.5,0.75108242,17.70000076,100.3678589,0,0.180000007,0.5,166,,-35,0.09073554,17.70000076,0.712403834,17.89999962,100.3532028,0,0.360000014,0.899999976,301,,0,0.213303134,20.20000076,0.727042258,17.89999962,100.3532028,0,0.349999994,0.899999976,275,,15,0.140333071,20.60000038,0.755614102,17.5,100.2652664,0,0.25,0.699999988,301,,30
2016-08-19 23:00:00,0.093558066,15.89999962,0.821200371,16.70000076,100.2945786,0,0.159999996,0.400000006,268,,-70,0.072536938,16.5,0.784617782,16.79999924,100.3825073,0,0.159999996,0.400000006,146,,-35,0.090263776,17.70000076,0.763694644,16.79999924,100.3678589,0,0.280000001,0.699999988,5,,0,0.213303134,19.79999924,0.810542464,16.60000038,100.3532028,0,0.25999999,0.600000024,7,,15,0.139902279,20.20000076,0.809967935,16.29999924,100.2652664,0,0.280000001,0.699999988,44,,30
2016-08-20 00:00:00,0.093088605,15.89999962,0.842240632,16.10000038,100.2799225,0,0.129999995,0.400000006,59,,-70,0.072050445,16.5,0.814895153,16.10000038,100.3971634,0,0.270000011,0.600000024,113,,-35,0.090263776,17.70000076,0.773061872,16.5,100.3825073,0,0.75,1.600000024,73,,0,0.213303134,19.29999924,0.793768585,16.29999924,100.3678589,0,0.579999983,1.200000048,35,,15,0.139471114,19.89999962,0.787975907,16.20000076,100.2652664,0,0.660000026,1.200000048,50,,30
2016-08-20 01:00:00,0.093088605,15.89999962,0.820364296,16.10000038,100.2652664,0,0.230000004,0.5,81,,-70,0.072050445,16.5,0.782968998,16.29999924,100.3825073,0,0.439999998,0.600000024,106,,-35,0.090263776,17.60000038,0.728777766,17.10000038,100.3678589,0,1.090000033,2,68,,0,0.213670999,19,0.75803113,16.70000076,100.3385468,0,0.689999998,1.5,21,,15,0.139471114,19.5,0.762398958,16.5,100.2506104,0,0.75999999,1.200000048,37,,30
2016-08-20 02:00:00,0.092618756,15.89999962,0.847390532,15.80000019,100.2506104,0,0.170000002,0.5,297,,-70,0.071563557,16.39999962,0.819831729,15.89999962,100.3532028,0,0.280000001,0.600000024,123,,-35,0.090263776,17.60000038,0.777997732,16.39999962,100.3385468,0,0.639999986,1.600000024,57,,0,0.213670999,18.60000038,0.777997732,16.39999962,100.3092346,0,0.660000026,1.100000024,354,,15,0.139039591,19.20000076,0.787549675,16.10000038,100.2359543,0,0.689999998,1.399999976,15,,30
2016-08-20 03:00:00,0.092618756,15.89999962,0.89221257,15.19999981,100.2359543,0,0.109999999,0.400000006,253,,-70,0.071563557,16.39999962,0.85771668,15.30000019,100.3385468,0,0.200000003,0.600000024,166,,-35,0.090263776,17.5,0.797674119,15.89999962,100.3092346,0,0.439999998,1.299999952,61,,0,0.213670999,18.29999924,0.808752954,15.89999962,100.3092346,0,0.519999981,1.399999976,1,,15,0.139039591,19,0.807944775,15.69999981,100.2066422,0,0.639999986,1.299999952,19,,30
2016-08-20 04:00:00,0.092618756,15.80000019,0.868812561,15.10000038,100.2212982,0,0.170000002,0.5,276,,-70,0.071563557,16.29999924,0.850946426,15,100.3092346,0,0.189999998,0.5,202,,-35,0.089791626,17.5,0.823177755,15.30000019,100.2799225,0,0.300000012,1.100000024,343,,0,0.213670999,18.10000038,0.83469069,15.30000019,100.2945786,0,0.340000004,0.899999976,316,,15,0.139039591,18.79999924,0.83382678,15.10000038,100.2066422,0,0.349999994,0.800000012,353,,30
2016-08-20 05:00:00,0.092618756,15.80000019,0.90255481,14.30000019,100.2066422,0,0.189999998,0.5,256,,-70,0.071563557,16.29999924,0.877995491,14.30000019,100.2945786,0,0.200000003,0.400000006,207,,-35,0.089791626,17.39999962,0.877995491,14.30000019,100.2652664,0,0.25,0.600000024,289,,0,0.213670999,17.79999924,0.872333527,14.39999962,100.2799225,0,0.289999992,0.699999988,266,,15,0.139039591,18.60000038,0.871339262,14.19999981,100.1919861,0,0.230000004,0.600000024,269,,30
2016-08-20 06:00:00,0.092148528,15.80000019,0.915035129,14.39999962,100.2212982,0,0.360000014,1.5,253,,-70,0.071563557,16.20000076,0.896734416,14.39999962,100.2945786,0,0.360000014,1.100000024,216,,-35,0.089791626,17.29999924,0.867153823,14.60000038,100.2799225,0,0.519999981,2.599999905,266,,0,0.213670999,17.60000038,0.845077813,15,100.2799225,0,0.75,3.900000095,233,,15,0.139039591,18.39999962,0.827472031,15,100.1919861,0,0.860000014,3.200000048,242,,30
2016-08-20 07:00:00,0.092148528,15.69999981,0.885976195,14.89999962,100.2506104,1.831054688,0.50999999,1.100000024,253,,-70,0.071076281,16.20000076,0.868256629,14.89999962,100.3238907,1.831054688,0.529999971,1,224,,-35,0.089791626,17.29999924,0.850946426,15,100.2945786,1.831054688,0.74000001,1.5,270,,0,0.213670999,17.5,0.817910433,15.39999962,100.3092346,14.6484375,0.75,2.200000048,247,,15,0.139039591,18.29999924,0.801314771,15.5,100.2212982,14.6484375,1.00999999,2.700000048,249,,30
2016-08-20 08:00:00,0.092148528,15.69999981,0.852965474,15.80000019,100.3092346,1.831054688,0.49000001,1.299999952,234,,-70,0.070588611,16.10000038,0.847016335,15.60000038,100.4118195,1.831054688,0.610000014,1.399999976,207,,-35,0.089791626,17.29999924,0.814292312,15.89999962,100.3971634,1.831054688,0.829999983,5,235,,0,0.213670999,17.39999962,0.788368762,16.29999924,100.3971634,20.14160156,1.230000019,4.800000191,205,,15,0.139039591,18.20000076,0.76726675,16.39999962,100.2945786,20.14160156,1.639999986,4.900000095,217,,30
2016-08-20 09:00:00,0.092618756,15.69999981,0.961735606,15.19999981,100.3678589,12.81738281,0.689999998,1.299999952,260,0.15,-70,0.069612086,16.10000038,0.95044595,15.10000038,100.4411316,16.47949219,0.379999995,0.899999976,231,,-35,0.089791626,17.20000076,0.938561261,15.19999981,100.4264755,16.47949219,0.680000007,1.200000048,273,,0,0.214038536,17.29999924,0.920659542,15.5,100.4264755,75.07324219,0.529999971,1.600000024,248,0.6,15,0.138175473,18.10000038,0.892244101,15.5,100.3532028,80.56640625,0.519999981,2.099999905,238,0.4,30
2016-08-20 10:00:00,0.092618756,15.69999981,0.998960435,16.29999924,100.3532028,34.79003906,0.319999993,1,203,,-70,0.069612086,16.10000038,0.983611345,16.20000076,100.4411316,38.45214844,0.349999994,0.800000012,157,,-35,0.089791626,17.20000076,0.948281646,16.60000038,100.4264755,45.77636719,0.649999976,1.799999952,185,,0,0.214038536,17.39999962,0.928935051,17.10000038,100.4264755,164.7949219,0.579999983,1.700000048,177,,15,0.138175473,18.10000038,0.898684502,17,100.3385468,173.9501953,0.660000026,1.600000024,181,,30
2016-08-20 11:00:00,0.092618756,15.60000038,0.937403381,18.70000076,100.3532028,65.91796875,0.270000011,1.100000024,161,,-70,0.069612086,16.10000038,0.924608231,18.60000038,100.4411316,71.41113281,0.469999999,1.100000024,152,,-35,0.089791626,17.20000076,0.879007757,19,100.4118195,89.72167969,1.600000024,3,182,,0,0.214038536,17.70000076,0.860885561,19.5,100.4264755,318.6035156,1.539999962,3.200000048,175,,15,0.138607711,18.29999924,0.843226373,19.5,100.3532028,336.9140625,1.399999976,2.799999952,180,,30
2016-08-20 12:00:00,0.092148528,15.60000038,0.871437192,20.5,100.3678589,62.25585938,0.310000002,1,156,,-70,0.070100546,16.10000038,0.851779342,20.39999962,100.4411316,64.08691406,0.529999971,1.200000048,139,,-35,0.089791626,17.20000076,0.816589713,20.60000038,100.4264755,71.41113281,2.160000086,4.400000095,186,,0,0.213303134,18.20000076,0.803849936,21.10000038,100.4264755,274.6582031,2.019999981,4.300000191,179,,15,0.139039591,18.60000038,0.795851409,21.10000038,100.3532028,292.96875,1.809999943,4.099999905,181,,30
2016-08-20 13:00:00,0.092148528,15.69999981,0.832383275,21.39999962,100.3678589,91.55273438,0.330000013,1,152,,-70,0.070100546,16.10000038,0.829599679,21.29999924,100.4557877,87.890625,0.569999993,1.299999952,140,,-35,0.089319095,17.20000076,0.773488224,21.39999962,100.4411316,91.55273438,2.980000019,5.400000095,193,,0,0.212934956,18.79999924,0.756988525,22,100.4411316,498.046875,2.940000057,5,187,,15,0.139039591,19.10000038,0.749418676,22,100.3678589,520.0195313,2.660000086,4.900000095,192,,30
2016-08-20 14:00:00,0.091677912,15.69999981,0.686666429,24.10000038,100.3532028,205.078125,0.430000007,1.799999952,162,,-70,0.070100546,16.20000076,0.678793907,23.79999924,100.4411316,232.5439453,0.560000002,1.600000024,152,,-35,0.088846177,17.29999924,0.64146024,23.79999924,100.4411316,82.39746094,3.089999914,7.199999809,195,,0,0.21256645,19.5,0.617877364,24.60000038,100.4264755,736.0839844,3.25,6.5,190,,15,0.139039591,19.5,0.614642441,24.60000038,100.3532028,763.5498047,3.299999952,7.099999905,197,,30
2016-08-20 15:00:00,0.091206916,15.80000019,0.629716396,24.79999924,100.3385468,126.3427734,0.439999998,1.700000048,229,,-70,0.069612086,16.29999924,0.630273342,24.70000076,100.4264755,100.7080078,0.379999995,1.399999976,171,,-35,0.088846177,17.39999962,0.575128913,24.89999962,100.4264755,58.59375,1.610000014,5.599999905,207,,0,0.212197617,20.5,0.538740695,26,100.4118195,598.7548828,2.059999943,6.199999809,191,,15,0.139471114,20.20000076,0.535950959,25.89999962,100.3238907,650.0244141,2.329999924,5.900000095,204,,30
2016-08-20 16:00:00,0.09073554,15.89999962,0.668074787,24.79999924,100.3532028,80.56640625,0.360000014,1.5,204,,-70,0.069612086,16.5,0.629716396,24.79999924,100.4411316,65.91796875,0.400000006,1.200000048,164,,-35,0.088846177,17.5,0.539866984,25.29999924,100.4411316,51.26953125,2.24000001,6.5,198,,0,0.212197617,21.5,0.527087629,25.79999924,100.4264755,289.3066406,2.779999971,5.699999809,192,,15,0.139902279,20.79999924,0.517986119,25.89999962,100.3385468,373.5351563,2.869999886,5.699999809,201,,30
2016-08-20 17:00:00,0.090263776,16,0.6580562,24.39999962,100.3532028,45.77636719,0.300000012,1.200000048,205,,-70,0.070100546,16.60000038,0.652738094,24.20000076,100.4411316,43.9453125,0.289999992,0.899999976,159,,-35,0.088846177,17.60000038,0.539967954,25.20000076,100.4557877,38.45214844,0.899999976,3.700000048,213,,0,0.212197617,21.89999962,0.502992213,25.79999924,100.4411316,166.6259766,1.429999948,4,192,,15,0.139902279,21.29999924,0.494033009,25.89999962,100.3532028,247.1923828,1.730000019,4.699999809,205,,30
2016-08-20 18:00:00,0.090263776,16,0.747766137,23.70000076,100.3385468,29.296875,0.25999999,0.800000012,205,,-70,0.070100546,16.70000076,0.707627356,23.60000038,100.4264755,31.12792969,0.289999992,0.800000012,151,,-35,0.088372879,17.70000076,0.549708843,24.89999962,100.4411316,29.296875,1.070000052,3,204,,0,0.212197617,22,0.53049773,25.39999962,100.4118195,128.1738281,1.399999976,3.099999905,193,,15,0.139902279,21.5,0.524329185,25.39999962,100.3385468,161.1328125,1.429999948,3.400000095,202,,30
2016-08-20 19:00:00,0.090263776,16.10000038,0.78004092,23,100.3385468,12.81738281,0.189999998,0.600000024,219,,-70,0.070100546,16.79999924,0.737298965,23,100.4264755,14.6484375,0.25,0.400000006,148,,-35,0.088372879,17.70000076,0.626666427,24.10000038,100.4264755,12.81738281,0.49000001,1.5,233,,0,0.212197617,22,0.595549762,24.5,100.4118195,65.91796875,0.529999971,1.899999976,209,,15,0.139902279,21.60000038,0.591997683,24.60000038,100.3385468,73.2421875,0.529999971,1.700000048,214,,30
2016-08-20 20:00:00,0.090263776,16.20000076,0.766513705,22.20000076,100.3532028,1.831054688,0.230000004,0.400000006,240,,-70,0.070100546,16.89999962,0.744863808,22.10000038,100.4557877,1.831054688,0.200000003,0.400000006,177,,-35,0.088372879,17.79999924,0.682409823,22.60000038,100.4411316,1.831054688,0.540000021,0.800000012,277,,0,0.212197617,21.79999924,0.658938706,23,100.4411316,12.81738281,0.529999971,1,267,,15,0.139471114,21.5,0.670107543,22.89999962,100.3532028,12.81738281,0.469999999,0.800000012,305,,30
2016-08-20 21:00:00,0.090263776,16.29999924,0.847603977,20.39999962,100.4704437,0,0.589999974,1.600000024,258,,-70,0.070100546,17,0.836049914,20.29999924,100.5583801,0,0.349999994,1.299999952,232,,-35,0.088372879,17.89999962,0.813341379,20.5,100.5437241,0,0.810000002,3.5,270,,0,0.212197617,21.60000038,0.799276948,20.70000076,100.5437241,0,0.790000021,4.300000191,221,,15,0.139471114,21.29999924,0.787720382,20.60000038,100.4557877,0,0.939999998,5.300000191,201,,30
2016-08-20 22:00:00,0.09073554,16.29999924,0.958610713,18.5,100.5437241,0,0.349999994,1.100000024,244,0.2,-70,0.067654334,17,0.950451136,18.39999962,100.6316528,0,0.360000014,0.800000012,207,,-35,0.088372879,17.89999962,0.94572252,18.39999962,100.6169968,0,0.600000024,4,258,,0,0.212197617,21.20000076,0.943287194,18.60000038,100.6023483,0,0.660000026,5,221,1.4,15,0.137742862,21.10000038,0.90692091,18.5,100.529068,0,0.769999981,3.299999952,212,1,30
2016-08-20 23:00:00,0.091206916,16.39999962,0.998868823,18,100.4997559,0,0.479999989,1.200000048,265,0.2,-70,0.067163914,17,0.985654593,17.89999962,100.5876923,0,0.400000006,1.200000048,240,,-35,0.088372879,17.89999962,0.985654593,17.89999962,100.5876923,0,0.600000024,1.600000024,276,0.1,0,0.212197617,20.89999962,0.982972503,18.10000038,100.5730362,0,0.550000012,1.700000048,266,1.8,15,0.137742862,20.79999924,0.940682292,18,100.4704437,0,0.469999999,2.200000048,240,1.8,30
2016-08-21 00:00:00,0.092148528,16.39999962,1.005172491,17.89999962,100.5437241,0,0.300000012,0.899999976,267,1.05,-70,0.068144366,17,0.996789992,17.79999924,100.6316528,0,0.310000002,0.800000012,233,,-35,0.089319095,17.89999962,1.001700282,17.79999924,100.6169968,0,0.379999995,1.5,272,,0,0.212934956,20.5,0.998868823,18,100.6023483,0,0.349999994,1.700000048,244,6.8,15,0.139039591,20.60000038,0.945531189,18,100.5144119,0,0.460000008,2,167,6,30
2016-08-21 01:00:00,0.092148528,16.39999962,1.008471847,17.29999924,100.5730362,0,0.25999999,0.800000012,243,0.25,-70,0.0666731,17,0.994471371,17.20000076,100.6902771,0,0.310000002,0.699999988,183,,-35,0.090263776,17.89999962,0.999571204,17.20000076,100.660965,0,0.300000012,1,268,,0,0.212934956,20.20000076,0.98580116,17.5,100.6463089,0,0.289999992,1.799999952,246,2.6,15,0.139471114,20.39999962,0.93161732,17.39999962,100.5583801,0,0.400000006,2.700000048,83,2.4,30
2016-08-21 02:00:00,0.092618756,16.39999962,1.009541512,16.79999924,100.529068,0,0.180000007,0.600000024,131,0.4,-70,0.066181891,17,1.000179887,16.70000076,100.6463089,0,0.319999993,0.600000024,131,,-35,0.090263776,17.89999962,1.00544405,16.70000076,100.6169968,0,0.519999981,1.899999976,130,,0,0.213670999,20,0.997958779,16.89999962,100.6169968,0,0.49000001,1.399999976,122,2.2,15,0.139471114,20.20000076,0.952002943,16.79999924,100.529068,0,0.560000002,1.799999952,120,1.8,30
2016-08-21 03:00:00,0.094495848,16.39999962,1.015972257,16.70000076,100.529068,0,0.25,0.699999988,212,0.05,-70,0.067163914,16.89999962,1.001258254,16.60000038,100.6316528,0,0.280000001,0.600000024,157,,-35,0.09073554,17.89999962,1.001258254,16.60000038,100.6023483,0,0.349999994,1,258,,0,0.213303134,19.70000076,0.999080002,16.79999924,100.6169968,0,0.430000007,1.5,224,0.2,15,0.139902279,20,0.952803016,16.70000076,100.529068,0,0.439999998,1.5,219,0.2,30
2016-08-21 04:00:00,0.095432103,16.29999924,1.015159845,16.29999924,100.5583801,0,0.219999999,0.600000024,196,,-70,0.067163914,16.89999962,0.999914289,16.20000076,100.6316528,0,0.310000002,0.699999988,158,,-35,0.09073554,17.79999924,1.010782957,16.20000076,100.6023483,0,0.430000007,1.5,250,,0,0.212934956,19.39999962,1.003348827,16.39999962,100.6169968,0,0.560000002,2.299999952,212,,15,0.139471114,19.79999924,0.961161971,16.29999924,100.529068,0,0.689999998,2.400000095,216,,30
2016-08-21 05:00:00,0.095899656,16.29999924,1.0194453,16.39999962,100.5437241,0,0.189999998,0.5,169,0.1,-70,0.067163914,16.89999962,1.010782957,16.20000076,100.6463089,0,0.319999993,0.600000024,151,,-35,0.09073554,17.79999924,1.015159845,16.29999924,100.6169968,0,0.560000002,2.799999952,230,,0,0.213670999,19.20000076,1.0129776,16.5,100.6169968,0,0.879999995,2.5,200,0.4,15,0.139471114,19.60000038,0.971155822,16.39999962,100.529068,0,1.080000043,3,213,0.4,30
2016-08-21 06:00:00,0.095899656,16.29999924,1.018309116,16.5,100.6023483,0,0.200000003,0.600000024,191,,-70,0.067163914,16.79999924,1.008714318,16.39999962,100.675621,0,0.349999994,0.699999988,154,,-35,0.09073554,17.70000076,1.014079809,16.39999962,100.6463089,0,0.560000002,2.299999952,237,,0,0.213670999,19,1.011853576,16.60000038,100.660965,0,0.959999979,2.799999952,202,,15,0.139039591,19.39999962,0.96499449,16.5,100.5730362,0,1.210000038,3,215,,30
2016-08-21 07:00:00,0.095899656,16.29999924,1.021651506,16.20000076,100.6023483,0,0.239999995,0.699999988,217,,-70,0.067163914,16.79999924,1.006313443,16.10000038,100.675621,0,0.300000012,0.699999988,160,,-35,0.09073554,17.70000076,1.01725173,16.10000038,100.660965,0,0.449999988,1.5,258,,0,0.214038536,18.79999924,1.009760022,16.29999924,100.660965,3.662109375,0.649999976,2.099999905,203,0.2,15,0.139039591,19.29999924,0.961874068,16.20000076,100.5730362,3.662109375,0.949999988,2.200000048,217,,30
2016-08-21 08:00:00,0.095899656,16.29999924,1.023766994,16,100.6169968,1.831054688,0.230000004,0.899999976,221,,-70,0.067163914,16.79999924,1.013710856,15.89999962,100.7049332,3.662109375,0.289999992,0.600000024,158,,-35,0.090263776,17.70000076,1.012758732,16,100.6902771,1.831054688,0.460000008,2.099999905,247,,0,0.214405745,18.60000038,1.011782646,16.10000038,100.6902771,25.63476563,0.75,2.5,192,,15,0.138607711,19.10000038,0.962560713,16.10000038,100.6023483,27.46582031,1.129999995,3.299999952,205,,30
2016-08-21 09:00:00,0.095899656,16.29999924,1.0270859,16.20000076,100.6463089,14.6484375,0.280000001,0.800000012,242,,-70,0.067163914,16.70000076,1.011782646,16.10000038,100.7342453,16.47949219,0.25,0.800000012,172,,-35,0.090263776,17.60000038,1.01725173,16.10000038,100.7049332,14.6484375,0.469999999,1.700000048,258,,0,0.214772642,18.5,1.008714318,16.39999962,100.7195892,76.90429688,0.620000005,2.299999952,197,,15,0.138607711,19,0.955762148,16.29999924,100.6316528,86.05957031,1.039999962,2.900000095,203,,30
2016-08-21 10:00:00,0.095899656,16.20000076,1.023640513,16.5,100.6463089,20.14160156,0.219999999,0.600000024,233,,-70,0.067654334,16.70000076,1.008714318,16.39999962,100.7195892,23.80371094,0.230000004,0.400000006,183,,-35,0.090263776,17.60000038,1.014079809,16.39999962,100.7049332,27.46582031,0.409999996,1,264,,0,0.214772642,18.39999962,0.999080002,16.79999924,100.7049332,108.0322266,0.49000001,1.899999976,207,,15,0.138607711,19,0.947538912,16.70000076,100.6316528,115.3564453,0.699999988,2.900000095,204,,30
2016-08-21 11:00:00,0.095899656,16.20000076,1.014870763,17.20000076,100.675621,71.41113281,0.289999992,0.899999976,241,,-70,0.068144366,16.70000076,1.000786424,17.10000038,100.7635574,69.58007813,0.289999992,0.800000012,194,,-35,0.090263776,17.60000038,0.987010777,17.39999962,100.7489014,115.3564453,0.649999976,2.799999952,258,,0,0.215505451,18.60000038,0.954061568,18.10000038,100.7342453,358.8867188,0.850000024,3.400000095,207,,15,0.137742862,19,0.912462413,17.89999962,100.660965,364.3798828,1.220000029,4.099999905,209,0.2,30
2016-08-21 12:00:00,0.095899656,16.20000076,0.945395768,18.79999924,100.675621,71.41113281,0.239999995,0.800000012,161,,-70,0.069123238,16.60000038,0.94204396,18.70000076,100.7782135,82.39746094,0.319999993,1,144,,-35,0.089791626,17.60000038,0.899599731,19.20000076,100.7635574,100.7080078,0.610000014,2.700000048,221,,0,0.215505451,19,0.870997667,19.79999924,100.7489014,349.7314453,0.99000001,3.5,186,,15,0.138607711,19.29999924,0.852055967,19.5,100.6902771,371.7041016,1.080000043,3.700000048,200,,30
2016-08-21 13:00:00,0.095899656,16.20000076,0.898220003,19.70000076,100.675621,86.05957031,0.349999994,1.200000048,206,,-70,0.069123238,16.70000076,0.900618732,19.5,100.7635574,84.22851563,0.340000004,1.100000024,197,,-35,0.089319095,17.60000038,0.885139108,19.70000076,100.7489014,80.56640625,0.75999999,3.5,241,,0,0.215505451,19.70000076,0.846539021,20.5,100.7635574,413.8183594,0.850000024,3.299999952,196,,15,0.139039591,19.70000076,0.830902398,20.39999962,100.6902771,444.9462891,0.939999998,3.799999952,207,,30
2016-08-21 14:00:00,0.095432103,16.20000076,0.819846928,21.10000038,100.660965,159.3017578,0.409999996,1.100000024,163,,-70,0.068144366,16.70000076,0.814739287,20.79999924,100.7635574,146.484375,0.49000001,1.200000048,160,,-35,0.088846177,17.70000076,0.782149732,20.79999924,100.7489014,86.05957031,2.210000038,5.400000095,199,,0,0.215505451,20.29999924,0.76563555,21.39999962,100.7489014,576.7822266,2.539999962,5,189,,15,0.139039591,20.20000076,0.757782876,21.39999962,100.675621,607.9101563,2.390000105,5.199999809,198,,30
2016-08-21 15:00:00,0.094964169,16.29999924,0.720303416,22.39999962,100.660965,117.1875,0.370000005,1.200000048,181,,-70,0.066181891,16.79999924,0.722924054,22,100.7489014,78.73535156,0.469999999,1.200000048,158,,-35,0.088372879,17.70000076,0.669934869,22,100.7489014,56.76269531,2.390000105,5.300000191,199,,0,0.215505451,21,0.648943663,22.79999924,100.7489014,606.0791016,2.75999999,5.800000191,191,,15,0.139471114,20.60000038,0.64926368,22.70000076,100.660965,650.0244141,2.859999895,5.800000191,200,,30
2016-08-21 16:00:00,0.094495848,16.29999924,0.820261061,17.70000076,100.7342453,9.155273438,0.550000012,3.599999905,258,0.05,-70,0.065690286,16.79999924,0.820477068,17.60000038,100.8368378,10.98632813,0.460000008,2.900000095,251,,-35,0.088372879,17.79999924,0.805559278,17.60000038,100.8221817,10.98632813,0.75999999,12,266,,0,0.21513921,21.60000038,0.795354962,17.89999962,100.8221817,54.93164063,0.670000017,13.10000038,208,0.4,15,0.139471114,21.10000038,0.775826693,17.79999924,100.7342453,58.59375,0.860000014,10.89999962,177,,30
2016-08-21 17:00:00,0.094964169,16.29999924,0.971155822,16.39999962,100.7635574,40.28320313,0.300000012,1,172,0.05,-70,0.065690286,17,0.950362384,16.29999924,100.8514862,38.45214844,0.300000012,0.600000024,159,,-35,0.088372879,17.89999962,0.894897819,16.70000076,100.8368378,34.79003906,0.649999976,2.099999905,206,,0,0.214772642,21.5,0.872074902,17.20000076,100.8368378,146.484375,0.74000001,1.899999976,198,,15,0.139471114,21.10000038,0.846009254,17.39999962,100.7489014,238.0371094,0.730000019,1.799999952,197,,30
2016-08-21 18:00:00,0.094495848,16.39999962,0.90020436,18.20000076,100.7342453,34.79003906,0.239999995,0.600000024,164,,-70,0.065690286,17,0.878306091,17.89999962,100.8514862,25.63476563,0.319999993,0.800000012,167,,-35,0.088372879,17.89999962,0.746928871,19,100.8368378,40.28320313,1.149999976,2.599999905,199,,0,0.215505451,21.20000076,0.746810198,19.10000038,100.8221817,42.11425781,1.269999981,2.599999905,194,0.2,15,0.139471114,20.89999962,0.723664761,19.79999924,100.7489014,228.8818359,1.129999995,2.400000095,202,,30
2016-08-21 19:00:00,0.094495848,16.39999962,0.925150573,18.10000038,100.7635574,5.493164063,0.239999995,0.699999988,215,,-70,0.065690286,17,0.902703464,17.89999962,100.8807983,5.493164063,0.289999992,0.699999988,208,,-35,0.088372879,17.89999962,0.817204237,18.60000038,100.8661423,3.662109375,0.519999981,1.299999952,263,,0,0.215871379,20.79999924,0.783364415,19,100.8514862,16.47949219,0.5,1.200000048,246,,15,0.139471114,20.79999924,0.778809965,19,100.7635574,21.97265625,0.50999999,1.299999952,253,,30
2016-08-21 20:00:00,0.094964169,16.39999962,0.973859429,16.70000076,100.8661423,0,0.389999986,1.200000048,227,0.25,-70,0.0666731,17,0.958877027,16.60000038,100.9687347,0,0.360000014,1.299999952,186,,-35,0.088372879,17.89999962,0.942274809,16.70000076,100.9394226,0,0.540000021,3.299999952,256,,0,0.215871379,20.39999962,0.92450881,17,100.9394226,0,0.75999999,4.800000191,221,1.4,15,0.138607711,20.5,0.883189976,17,100.8661423,0,0.910000026,4.599999905,210,1,30
2016-08-21 21:00:00,0.094964169,16.39999962,0.983780384,15.39999962,100.9101105,0,0.25,0.899999976,192,0.05,-70,0.067163914,17,0.972846389,15.30000019,101.0127029,0,0.280000001,0.699999988,153,,-35,0.088372879,17.89999962,0.967089951,15.30000019,100.9833908,0,0.419999987,1.399999976,261,,0,0.216236979,20,0.954305112,15.60000038,100.9980469,0,0.629999995,1.799999952,236,0.2,15,0.138607711,20.20000076,0.914976478,15.5,100.8954544,0,0.620000005,1.899999976,244,0.2,30
2016-08-21 22:00:00,0.094964169,16.39999962,1.003529906,15,100.9687347,0,0.5,1,254,,-70,0.067163914,17,0.992293298,14.89999962,101.0566711,0,0.25999999,0.600000024,212,,-35,0.088372879,17.89999962,0.998199821,14.89999962,101.027359,0,0.800000012,1.700000048,276,,0,0.216236979,19.70000076,0.985431671,15.10000038,101.027359,0,0.639999986,1.600000024,260,0.2,15,0.138607711,20,0.944843948,15,100.9394226,0,0.670000017,1.600000024,267,,30
2016-08-21 23:00:00,0.094964169,16.39999962,1.005657554,14.60000038,101.0127029,0,0.5,0.899999976,247,,-70,0.067163914,16.89999962,1.000438452,14.39999962,101.1006317,0,0.289999992,0.5,189,,-35,0.088372879,17.79999924,1.00005281,14.5,101.0566711,0,0.660000026,1.100000024,267,,0,0.216236979,19.29999924,0.99361372,14.60000038,101.0713272,0,0.460000008,0.899999976,236,,15,0.138175473,19.70000076,0.951565385,14.5,100.9833908,0,0.589999974,1.5,246,,30
2016-08-22 00:00:00,0.094495848,16.29999924,1.0147475,13.80000019,101.0127029,0,0.409999996,0.800000012,247,,-70,0.0666731,16.89999962,1.002214432,13.69999981,101.1006317,0,0.270000011,0.600000024,183,,-35,0.088372879,17.79999924,1.002063155,13.80000019,101.0859833,0,0.5,1.200000048,264,,0,0.216602266,18.89999962,0.995575786,13.89999962,101.0859833,0,0.419999987,1.299999952,216,,15,0.138175473,19.5,0.951325774,13.80000019,100.9980469,0,0.600000024,1.899999976,237,,30
2016-08-22 01:00:00,0.094495848,16.29999924,1.015471816,13.39999962,101.0420151,0,0.419999987,0.800000012,255,,-70,0.066181891,16.79999924,1.00245893,13.30000019,101.1445999,0,0.239999995,0.600000024,177,,-35,0.087899193,17.70000076,1.009010911,13.30000019,101.1152878,0,0.439999998,1.100000024,263,,0,0.217331856,18.5,1.002409816,13.5,101.1152878,0,0.360000014,1.399999976,211,,15,0.137742862,19.10000038,0.956886888,13.39999962,101.0127029,0,0.50999999,2.5,232,,30
2016-08-22 02:00:00,0.094495848,16.29999924,1.015617013,13.19999981,101.0859833,0,0.340000004,0.800000012,239,,-70,0.066181891,16.79999924,1.008930087,13,101.173912,0,0.289999992,0.600000024,169,,-35,0.087899193,17.60000038,1.008995414,13.10000038,101.159256,0,0.409999996,0.899999976,254,,0,0.217331856,18.20000076,1.00245893,13.30000019,101.159256,0,0.469999999,1.299999952,210,,15,0.137742862,18.79999924,0.950042725,13.30000019,101.0566711,0,0.519999981,2,226,,30
2016-08-22 03:00:00,0.094495848,16.20000076,1.015611768,13,101.1152878,0,0.300000012,0.5,238,,-70,0.066181891,16.70000076,1.008682013,12.80000019,101.2032242,0,0.25999999,0.5,170,,-35,0.087899193,17.60000038,1.008825898,12.89999962,101.173912,0,0.330000013,0.800000012,263,,0,0.217331856,17.79999924,1.002248526,13,101.173912,0,0.25999999,0.600000024,232,,15,0.137742862,18.5,0.961294234,12.80000019,101.0859833,0,0.330000013,0.699999988,243,,30
2016-08-22 04:00:00,0.094495848,16.10000038,1.021815062,12.5,101.1152878,0,0.289999992,0.699999988,234,,-70,0.066181891,16.60000038,1.007698536,12.39999962,101.2325363,0,0.289999992,0.5,161,,-35,0.087899193,17.5,1.008006692,12.5,101.2032242,0,0.340000004,0.899999976,260,,0,0.217696175,17.5,1.008273005,12.60000038,101.2032242,0,0.349999994,1.200000048,223,,15,0.137309894,18.29999924,0.966581821,12.5,101.1006317,0,0.460000008,1.200000048,232,,30
2016-08-22 05:00:00,0.094495848,16.10000038,1.021597743,12.39999962,101.159256,0,0.389999986,0.899999976,246,,-70,0.066181891,16.5,1.014343143,12.30000019,101.2618484,0,0.25999999,0.5,173,,-35,0.087899193,17.39999962,1.021338582,12.30000019,101.2471924,0,0.379999995,0.899999976,264,,0,0.218423858,17.20000076,1.008006692,12.5,101.2471924,0,0.370000005,1.100000024,204,,15,0.137309894,18,0.972370267,12.30000019,101.1445999,0,0.460000008,1.100000024,211,,30
2016-08-22 06:00:00,0.094495848,16,1.021036863,12.19999981,101.2325363,0,0.419999987,0.800000012,244,,-70,0.065690286,16.5,1.013603806,12.10000038,101.3351212,0,0.280000001,0.5,174,,-35,0.087899193,17.39999962,1.020691991,12.10000038,101.3058167,0,0.370000005,0.800000012,259,,0,0.218787208,16.89999962,1.013995171,12.19999981,101.2911606,0,0.529999971,1.200000048,194,,15,0.137309894,17.79999924,0.977493346,12,101.2325363,0,0.649999976,1.100000024,205,,30
2016-08-22 07:00:00,0.094027147,16,1.027438283,12,101.2911606,1.831054688,0.400000006,0.899999976,237,,-70,0.065690286,16.39999962,1.019870162,11.89999962,101.3937454,3.662109375,0.319999993,0.699999988,172,,-35,0.087899193,17.29999924,1.013995171,12.19999981,101.3644333,27.46582031,0.5,1.100000024,262,,0,0.218787208,16.70000076,1.021338582,12.30000019,101.3644333,42.11425781,0.579999983,1.600000024,202,,15,0.137309894,17.5,0.985251248,12.10000038,101.2911606,36.62109375,0.829999983,2,213,,30
2016-08-22 08:00:00,0.094027147,15.89999962,1.028990984,12.80000019,101.3351212,14.6484375,0.49000001,1,247,,-70,0.065690286,16.29999924,1.022126198,12.69999981,101.4377136,29.296875,0.270000011,0.600000024,192,,-35,0.087899193,17.20000076,0.983008385,13.5,101.4230576,111.6943359,0.689999998,1.399999976,272,,0,0.218787208,16.39999962,0.976672411,13.89999962,101.4084015,164.7949219,0.439999998,1.700000048,214,0.2,15,0.138175473,17.39999962,0.944503427,13.60000038,101.3204727,153.8085938,0.689999998,2.900000095,211,,30
2016-08-22 09:00:00,0.094027147,15.89999962,1.032011747,14.19999981,101.3790894,38.45214844,0.460000008,1,246,,-70,0.065690286,16.20000076,1.013071775,14.30000019,101.4816818,58.59375,0.270000011,0.699999988,207,,-35,0.087899193,17.10000038,0.931717992,15.60000038,101.4377136,183.1054688,0.699999988,1.600000024,272,,0,0.218787208,16.60000038,0.901764274,16.29999924,101.4523697,307.6171875,0.589999974,2.400000095,211,,15,0.139039591,17.29999924,0.891843975,15.89999962,101.3644333,298.4619141,0.819999993,3.200000048,204,0.2,30
2016-08-22 10:00:00,0.094027147,15.80000019,0.989906192,16.10000038,101.3937454,58.59375,0.419999987,1.399999976,249,,-70,0.065690286,16.20000076,0.968725741,16,101.4816818,65.91796875,0.25999999,1,211,,-35,0.087425128,17.10000038,0.938337207,16.5,101.4670258,135.4980469,0.589999974,2.099999905,271,,0,0.218787208,17,0.914179087,17,101.4670258,294.7998047,0.819999993,3.400000095,191,,15,0.139039591,17.5,0.884002686,16.79999924,101.3790894,309.4482422,1.269999981,5,195,,30
2016-08-22 11:00:00,0.094027147,15.80000019,0.90073204,17.5,101.4523697,93.38378906,0.479999989,1.700000048,262,,-70,0.065198295,16.20000076,0.885719836,17.5,101.5403061,98.87695313,0.330000013,1.399999976,232,,-35,0.087425128,17.20000076,0.842744529,18.20000076,101.52565,184.9365234,0.699999988,3.400000095,269,,0,0.218787208,17.60000038,0.826028705,18.70000076,101.52565,470.5810547,0.790000021,6,188,,15,0.139471114,17.79999924,0.808592737,18.39999962,101.4523697,483.3984375,1.220000029,6.400000095,191,,30
2016-08-22 12:00:00,0.093558066,15.80000019,0.837471664,18.29999924,101.4816818,111.6943359,0.409999996,1.399999976,261,,-70,0.064213112,16.20000076,0.833167911,18.20000076,101.5696106,113.5253906,0.379999995,1.299999952,242,,-35,0.087425128,17.29999924,0.802825689,18.70000076,101.5549622,104.3701172,0.75999999,3.299999952,243,,0,0.218060181,18.5,0.763759971,19.5,101.5696106,558.4716797,1.059999943,4.199999809,172,,15,0.139471114,18.39999962,0.760161757,19.20000076,101.4816818,574.9511719,1.179999948,5.199999809,189,,30
2016-08-22 13:00:00,0.093558066,15.80000019,0.762257516,19.89999962,101.4670258,84.22851563,0.460000008,1.799999952,273,,-70,0.064213112,16.20000076,0.758331299,19.79999924,101.5696106,71.41113281,0.340000004,1.5,260,,-35,0.087425128,17.39999962,0.735861003,20.10000038,101.5549622,75.07324219,0.639999986,3.200000048,274,,0,0.217696175,19.29999924,0.700158,21,101.5549622,611.5722656,0.930000007,5.699999809,162,,15,0.139471114,19,0.70111239,20.60000038,101.4816818,637.2070313,1.129999995,4.400000095,176,,30
2016-08-22 14:00:00,0.093088605,15.89999962,0.712229669,21,101.4670258,161.1328125,0.419999987,1.5,252,,-70,0.064213112,16.29999924,0.721398652,20.70000076,101.5696106,170.2880859,0.300000012,1.399999976,198,,-35,0.087425128,17.5,0.688280761,20.89999962,101.5549622,65.91796875,0.949999988,4.900000095,230,,0,0.217331856,20.29999924,0.655174136,21.79999924,101.5403061,628.0517578,1.379999995,5.300000191,186,,15,0.139902279,19.60000038,0.651597321,21.60000038,101.4670258,659.1796875,1.590000033,6.300000191,195,,30
2016-08-22 15:00:00,0.092618756,15.89999962,0.662610352,21.89999962,101.4670258,128.1738281,0.409999996,1.700000048,247,,-70,0.064213112,16.39999962,0.670754433,21.70000076,101.5696106,102.5390625,0.340000004,1.700000048,190,,-35,0.086950675,17.60000038,0.639848411,21.79999924,101.5696106,56.76269531,0.800000012,3.400000095,228,,0,0.217331856,21,0.602075517,22.79999924,101.5549622,642.7001953,1.299999952,5.400000095,176,,15,0.140333071,20.10000038,0.580520928,22.89999962,101.4816818,688.4765625,1.440000057,5,193,,30
2016-08-22 16:00:00,0.092148528,16,0.623706937,22.79999924,101.4670258,208.7402344,0.409999996,1.5,239,,-70,0.064213112,16.5,0.631788015,22.29999924,101.5696106,82.39746094,0.340000004,1.200000048,202,,-35,0.086950675,17.70000076,0.605793655,22.39999962,101.5696106,54.93164063,0.850000024,3.700000048,226,,0,0.216602266,21.70000076,0.573641121,23.29999924,101.5549622,452.2705078,1.320000052,5.099999905,186,,15,0.140763521,20.5,0.542898715,23.70000076,101.4816818,681.1523438,1.669999957,6.400000095,195,,30
2016-08-22 17:00:00,0.091677912,16,0.639384627,22.20000076,101.4816818,49.43847656,0.400000006,1.5,240,,-70,0.064213112,16.60000038,0.662610352,21.89999962,101.5842667,45.77636719,0.300000012,1.100000024,181,,-35,0.086950675,17.79999924,0.598254621,22.20000076,101.5842667,31.12792969,0.720000029,3.299999952,224,,0,0.216602266,21.79999924,0.562211573,22.70000076,101.5696106,67.74902344,1.269999981,4.400000095,178,,15,0.140763521,21,0.506043017,23.89999962,101.4963379,509.0332031,1.419999957,5.199999809,190,,30
2016-08-22 18:00:00,0.091677912,16.10000038,0.678747237,21.60000038,101.4816818,31.12792969,0.280000001,1.100000024,231,,-70,0.064213112,16.79999924,0.707867861,21.10000038,101.6135788,23.80371094,0.270000011,1.299999952,158,,-35,0.086950675,17.89999962,0.605488777,21.89999962,101.5989227,29.296875,0.560000002,2.799999952,222,,0,0.216602266,21.5,0.57208097,22.20000076,101.5842667,42.11425781,0.959999979,3.700000048,180,,15,0.140763521,21.20000076,0.520812929,23.20000076,101.510994,210.5712891,0.99000001,3.599999905,194,,30
2016-08-22 19:00:00,0.091677912,16.20000076,0.762975216,20.60000038,101.4963379,9.155273438,0.239999995,1,207,,-70,0.064213112,16.79999924,0.743219256,20.39999962,101.6135788,7.32421875,0.239999995,0.899999976,156,,-35,0.086950675,17.89999962,0.639939547,21.20000076,101.6135788,7.32421875,0.430000007,2.200000048,242,,0,0.216602266,21,0.597511113,21.70000076,101.5989227,25.63476563,0.680000007,3,204,,15,0.140763521,21.10000038,0.57883203,21.89999962,101.510994,38.45214844,0.639999986,3.299999952,213,,30
2016-08-22 20:00:00,0.091677912,16.29999924,0.781851411,19.39999962,101.52565,0,0.289999992,0.699999988,226,,-70,0.064213112,16.89999962,0.768852174,19.29999924,101.6135788,0,0.25999999,0.5,173,,-35,0.086950675,17.89999962,0.719541669,19.60000038,101.6135788,0,0.560000002,1.399999976,258,,0,0.216602266,20.60000038,0.684790969,20,101.6135788,9.155273438,0.560000002,1.5,230,,15,0.140333071,20.79999924,0.693352878,19.89999962,101.52565,10.98632813,0.589999974,1.600000024,240,,30
2016-08-22 21:00:00,0.091677912,16.29999924,0.842744529,18.20000076,101.5403061,0,0.330000013,0.600000024,239,,-70,0.064213112,17,0.828379571,18.20000076,101.6428909,0,0.25999999,0.600000024,204,,-35,0.086950675,18,0.79940474,18.29999924,101.6282349,0,0.680000007,1.299999952,271,,0,0.216602266,20.20000076,0.789444089,18.5,101.6428909,0,0.479999989,0.899999976,258,,15,0.139902279,20.5,0.789678276,18.39999962,101.5403061,0,0.479999989,1.200000048,252,,30
2016-08-22 22:00:00,0.091677912,16.29999924,0.863667667,17.89999962,101.5842667,0,0.300000012,0.699999988,236,,-70,0.064213112,17,0.854391456,17.79999924,101.6868591,0,0.289999992,0.600000024,208,,-35,0.086475834,18,0.814611495,18,101.6722031,0,0.660000026,1.100000024,268,,0,0.216602266,19.79999924,0.780045927,18.5,101.6722031,0,0.50999999,1.200000048,245,,15,0.139471114,20.20000076,0.780221045,18.39999962,101.5842667,0,0.639999986,1.200000048,245,,30
2016-08-22 23:00:00,0.091206916,16.29999924,0.859301746,17.79999924,101.5989227,0,0.360000014,0.800000012,239,,-70,0.064213112,17,0.839660525,17.79999924,101.7015152,0,0.340000004,0.699999988,215,,-35,0.086475834,17.89999962,0.809993386,17.89999962,101.6868591,0,0.649999976,1.200000048,268,,0,0.216602266,19.5,0.770763814,18.39999962,101.6868591,0,0.529999971,1.5,247,,15,0.139471114,20,0.780371308,18.29999924,101.5842667,0,0.620000005,1.799999952,249,,30
2016-08-23 00:00:00,0.091206916,16.29999924,0.880715787,17.5,101.5989227,0,0.280000001,0.600000024,221,,-70,0.064213112,16.89999962,0.861116588,17.39999962,101.7015152,0,0.319999993,0.699999988,201,,-35,0.086475834,17.89999962,0.830422223,17.60000038,101.6868591,0,0.409999996,0.800000012,266,,0,0.216967225,19.29999924,0.809993386,17.89999962,101.6868591,0,0.400000006,0.899999976,234,,15,0.139471114,19.79999924,0.805113912,17.89999962,101.5842667,0,0.5,1.5,235,,30
2016-08-23 01:00:00,0.091206916,16.29999924,0.895727992,17.5,101.5842667,0,0.25,0.600000024,220,,-70,0.064213112,16.89999962,0.88125962,17.39999962,101.6868591,0,0.330000013,0.600000024,199,,-35,0.086950675,17.89999962,0.855695426,17.5,101.6722031,0,0.379999995,1.100000024,264,,0,0.216967225,19.10000038,0.829839945,17.79999924,101.6868591,0,0.370000005,1,227,,15,0.139471114,19.60000038,0.820019364,17.79999924,101.5842667,0,0.540000021,2.400000095,226,,30
2016-08-23 02:00:00,0.091206916,16.29999924,0.891331196,17.39999962,101.5989227,0,0.270000011,0.600000024,227,,-70,0.064213112,16.89999962,0.881779373,17.29999924,101.6868591,0,0.319999993,0.800000012,195,,-35,0.086950675,17.89999962,0.840367436,17.60000038,101.6722031,0,0.409999996,1.600000024,238,,0,0.216967225,19,0.814872861,17.89999962,101.6868591,0,0.649999976,2.200000048,196,,15,0.139471114,19.5,0.790367067,18,101.5842667,0,0.870000005,2.799999952,202,,30
2016-08-23 03:00:00,0.091206916,16.29999924,0.880715787,17.5,101.5842667,0,0.200000003,0.600000024,215,,-70,0.064213112,16.89999962,0.871188104,17.39999962,101.6868591,0,0.239999995,0.800000012,181,,-35,0.086950675,17.89999962,0.840026379,17.70000076,101.6722031,0,0.460000008,1.700000048,206,,0,0.216967225,18.79999924,0.829511285,17.89999962,101.6868591,0,0.720000029,2.799999952,178,,15,0.139471114,19.29999924,0.809993386,17.89999962,101.5842667,0,0.839999974,3.299999952,192,,30
2016-08-23 04:00:00,0.09073554,16.29999924,0.905736089,17.5,101.5842667,0,0.330000013,1.299999952,250,,-70,0.064213112,16.79999924,0.891331196,17.39999962,101.6868591,0,0.360000014,1.100000024,229,,-35,0.086950675,17.79999924,0.885719836,17.5,101.6722031,0,0.519999981,2.599999905,234,,0,0.216967225,18.70000076,0.880148113,17.60000038,101.6722031,0,0.790000021,3.400000095,182,,15,0.139471114,19.20000076,0.860699475,17.5,101.5842667,0,1.049999952,3.900000095,198,,30
2016-08-23 05:00:00,0.09073554,16.29999924,0.97292608,16.79999924,101.5842667,0,0.25,0.699999988,226,,-70,0.064213112,16.79999924,0.963331223,16.70000076,101.6868591,0,0.340000004,1,180,,-35,0.086950675,17.79999924,0.963331223,16.70000076,101.6428909,0,0.74000001,2.5,204,,0,0.216967225,18.5,0.962464511,16.79999924,101.657547,0,1.379999995,3.400000095,190,,15,0.139471114,19.10000038,0.927091002,16.60000038,101.5842667,0,1.580000043,3.900000095,199,,30
2016-08-23 06:00:00,0.09073554,16.29999924,0.978156865,16.79999924,101.5842667,0,0.25999999,0.899999976,213,,-70,0.064213112,16.79999924,0.963331223,16.70000076,101.6722031,0,0.349999994,0.899999976,174,,-35,0.086475834,17.79999924,0.962464511,16.79999924,101.6428909,0,0.560000002,2.400000095,216,,0,0.216967225,18.39999962,0.961574852,16.89999962,101.657547,0,1.110000014,2.799999952,192,,15,0.139471114,19,0.915387392,16.79999924,101.5842667,0,1.25,4,200,,30
2016-08-23 07:00:00,0.09073554,16.29999924,0.978156865,16.79999924,101.5842667,0,0.280000001,0.699999988,212,,-70,0.064213112,16.79999924,0.962464511,16.79999924,101.6868591,0,0.430000007,1,178,,-35,0.086475834,17.70000076,0.956377208,16.89999962,101.6428909,3.662109375,0.629999995,2.299999952,213,,0,0.216967225,18.29999924,0.955497921,17,101.657547,10.98632813,1.340000033,2.799999952,196,,15,0.139471114,18.89999962,0.914795578,16.89999962,101.5842667,10.98632813,1.539999962,3.200000048,203,,30
2016-08-23 08:00:00,0.090263776,16.29999924,0.970992446,17,101.5989227,14.6484375,0.360000014,1.299999952,217,,-70,0.064213112,16.70000076,0.950333059,17,101.6868591,23.80371094,0.50999999,1.200000048,194,,-35,0.086475834,17.70000076,0.919087708,17.70000076,101.6722031,82.39746094,0.779999971,2.900000095,226,,0,0.216967225,18.20000076,0.918225288,17.79999924,101.6722031,133.6669922,1.600000024,4.699999809,196,,15,0.139471114,18.79999924,0.895727992,17.5,101.5842667,120.8496094,2.059999943,4.599999905,205,,30
2016-08-23 09:00:00,0.090263776,16.29999924,0.927100837,17.89999962,101.6282349,27.46582031,0.360000014,1,246,,-70,0.063719928,16.70000076,0.906740129,18,101.7161713,45.77636719,0.389999986,1.200000048,225,,-35,0.086000606,17.70000076,0.844843388,19.29999924,101.7015152,179.4433594,0.800000012,3.400000095,250,,0,0.216602266,18.29999924,0.838811576,19.5,101.7015152,272.8271484,1.25,3.799999952,189,,15,0.139471114,18.79999924,0.828280449,19.10000038,101.6135788,250.8544922,1.559999943,6.099999905,201,,30
2016-08-23 10:00:00,0.090263776,16.29999924,0.873541653,19.10000038,101.6428909,42.11425781,0.419999987,1.299999952,249,,-70,0.064213112,16.70000076,0.865344405,19,101.7454834,49.43847656,0.349999994,1.200000048,228,,-35,0.086000606,17.70000076,0.828455329,19.70000076,101.7308273,109.8632813,0.670000017,2.900000095,259,,0,0.216602266,18.60000038,0.817469239,20,101.7308273,239.8681641,0.970000029,4.400000095,174,,15,0.139471114,18.89999962,0.801664531,19.79999924,101.6428909,241.6992188,1.340000033,5.400000095,188,,30
2016-08-23 11:00:00,0.090263776,16.29999924,0.852694869,19.89999962,101.657547,40.28320313,0.330000013,1.399999976,264,,-70,0.064213112,16.70000076,0.844997764,19.79999924,101.7601395,42.11425781,0.219999999,1.100000024,197,,-35,0.085524991,17.79999924,0.815869451,20.20000076,101.7454834,42.11425781,0.519999981,2,269,,0,0.216236979,19,0.795968771,20.60000038,101.7601395,179.4433594,0.75,4.400000095,175,,15,0.139471114,19.10000038,0.78079772,20.39999962,101.6722031,194.0917969,0.980000019,5.199999809,180,,30
2016-08-23 12:00:00,0.090263776,16.29999924,0.852694869,19.89999962,101.6722031,60.42480469,0.5,1.399999976,264,,-70,0.064213112,16.70000076,0.849331081,19.79999924,101.7747955,64.08691406,0.289999992,1.299999952,227,,-35,0.085524991,17.89999962,0.839775264,19.89999962,101.7601395,62.25585938,0.699999988,2,268,,0,0.216236979,19.29999924,0.823446155,20.29999924,101.7601395,265.5029297,0.810000002,3.599999905,182,,15,0.139471114,19.29999924,0.812424541,20.10000038,101.6722031,289.3066406,0.99000001,4.099999905,185,,30
2016-08-23 13:00:00,0.089791626,16.29999924,0.837210655,20.60000038,101.6428909,73.2421875,0.419999987,1.299999952,270,,-70,0.064213112,16.79999924,0.8299402,20.5,101.7601395,71.41113281,0.239999995,1.100000024,240,,-35,0.085524991,17.89999962,0.814739287,20.79999924,101.7454834,71.41113281,0.579999983,2.200000048,278,,0,0.216236979,19.79999924,0.798930764,21.20000076,101.7601395,313.1103516,0.779999971,4.199999809,135,,15,0.139471114,19.60000038,0.78385365,21.10000038,101.6722031,336.9140625,0.839999974,4.800000191,140,,30
2016-08-23 14:00:00,0.089791626,16.29999924,0.833086491,20.60000038,101.6722031,51.26953125,0.529999971,1.399999976,260,,-70,0.064213112,16.79999924,0.835077822,20.39999962,101.7747955,53.10058594,0.289999992,1,223,,-35,0.085524991,18,0.816589713,20.60000038,101.7747955,49.43847656,0.649999976,2.400000095,273,,0,0.215871379,20.29999924,0.795851409,21.10000038,101.7601395,219.7265625,0.74000001,3.099999905,40,,15,0.139902279,19.89999962,0.784659803,21,101.7015152,238.0371094,0.839999974,5.5,63,,30
2016-08-23 15:00:00,0.089319095,16.39999962,0.817839503,20.89999962,101.6722031,86.05957031,0.349999994,1.299999952,290,,-70,0.064213112,16.89999962,0.823870063,20.70000076,101.7747955,67.74902344,0.230000004,1.100000024,185,,-35,0.085524991,18.10000038,0.801644683,20.89999962,101.7747955,47.60742188,0.50999999,2.700000048,301,,0,0.215505451,20.60000038,0.77657038,21.5,101.7601395,344.2382813,0.939999998,3.900000095,44,,15,0.139902279,20.20000076,0.757058561,21.5,101.6868591,380.859375,1.049999952,4.900000095,60,,30
2016-08-23 16:00:00,0.089319095,16.39999962,0.823398709,21.5,101.657547,47.60742188,0.280000001,1.100000024,249,,-70,0.064213112,17,0.816677928,21.39999962,101.7601395,45.77636719,0.230000004,0.800000012,160,,-35,0.085524991,18.10000038,0.786401749,21.70000076,101.7601395,42.11425781,0.430000007,2.200000048,285,,0,0.21513921,21,0.746996403,22.29999924,101.7308273,197.7539063,0.779999971,2.900000095,41,,15,0.140333071,20.39999962,0.728414416,22.29999924,101.657547,225.2197266,1.00999999,3.299999952,43,,30
2016-08-23 17:00:00,0.089319095,16.39999962,0.819925487,21.79999924,101.657547,38.45214844,0.25999999,0.899999976,255,,-70,0.064213112,17,0.817241013,21.70000076,101.7747955,38.45214844,0.219999999,0.699999988,166,,-35,0.085524991,18.20000076,0.775913239,22,101.7601395,34.79003906,0.419999987,2,298,,0,0.21513921,21.29999924,0.741639137,22.5,101.7454834,161.1328125,0.75999999,3.299999952,26,,15,0.140763521,20.70000076,0.722551584,22.60000038,101.6722031,199.5849609,1.070000052,3.900000095,40,,30
2016-08-23 18:00:00,0.089319095,16.5,0.852014959,21.39999962,101.6722031,27.46582031,0.230000004,0.899999976,238,,-70,0.064213112,17.10000038,0.845401525,21.29999924,101.7747955,27.46582031,0.25,0.899999976,146,,-35,0.085048996,18.29999924,0.773948371,21.79999924,101.7747955,23.80371094,0.419999987,2.900000095,351,,0,0.214772642,21.39999962,0.75614965,22.10000038,101.7454834,98.87695313,0.800000012,3,20,,15,0.140763521,20.79999924,0.737339914,22.10000038,101.6722031,122.6806641,1.25,3.700000048,33,,30
2016-08-23 19:00:00,0.088846177,16.5,0.846628129,21.20000076,101.6722031,12.81738281,0.230000004,0.899999976,213,,-70,0.064213112,17.20000076,0.819846928,21.10000038,101.7747955,12.81738281,0.289999992,0.899999976,141,,-35,0.085048996,18.29999924,0.732433021,21.70000076,101.7747955,10.98632813,0.540000021,2.799999952,46,,0,0.214772642,21.29999924,0.72413981,21.79999924,101.7601395,40.28320313,0.920000017,3.299999952,15,,15,0.140763521,20.79999924,0.704499483,21.89999962,101.6868591,53.10058594,1.269999981,4.800000191,32,,30
2016-08-23 20:00:00,0.088846177,16.60000038,0.848388314,19.89999962,101.7015152,0,0.25999999,0.5,254,,-70,0.064213112,17.29999924,0.850256801,19.70000076,101.7894516,1.831054688,0.180000007,0.5,172,,-35,0.085048996,18.29999924,0.786903381,20.10000038,101.7747955,0,0.569999993,0.899999976,275,,0,0.214772642,21.10000038,0.759920776,20.39999962,101.7747955,9.155273438,0.469999999,0.899999976,270,,15,0.140763521,20.70000076,0.752024829,20.29999924,101.6868591,10.98632813,0.479999989,1.700000048,293,,30
2016-08-23 21:00:00,0.088846177,16.60000038,0.880296886,18.29999924,101.7308273,0,0.349999994,0.600000024,251,,-70,0.064213112,17.29999924,0.871474445,18.20000076,101.8187561,0,0.270000011,0.5,211,,-35,0.085048996,18.39999962,0.851746738,18.29999924,101.8041,0,0.579999983,0.899999976,274,,0,0.214772642,20.70000076,0.84698838,18.29999924,101.8041,0,0.649999976,1,235,,15,0.140763521,20.5,0.843236208,18.10000038,101.7161713,0,0.550000012,1,232,,30
2016-08-23 22:00:00,0.088846177,16.70000076,0.931746602,16.70000076,101.7308273,0,0.389999986,0.600000024,254,,-70,0.064213112,17.29999924,0.915954232,16.70000076,101.8334122,0,0.340000004,0.5,226,,-35,0.084572613,18.39999962,0.899695039,16.79999924,101.8187561,0,0.49000001,0.800000012,278,,0,0.214772642,20.29999924,0.899202466,16.89999962,101.8187561,0,0.430000007,0.800000012,257,,15,0.140333071,20.20000076,0.895685494,16.5,101.7161713,0,0.340000004,0.600000024,260,,30
2016-08-23 23:00:00,0.088846177,16.70000076,0.96385622,15.89999962,101.7454834,0,0.379999995,1,252,,-70,0.064213112,17.29999924,0.947238028,15.89999962,101.8480682,0,0.230000004,0.400000006,200,,-35,0.084572613,18.29999924,0.947238028,15.89999962,101.8334122,0,0.439999998,0.699999988,278,,0,0.21513921,19.79999924,0.935701013,16,101.8334122,0,0.400000006,0.899999976,253,,15,0.139902279,19.79999924,0.914289773,15.80000019,101.7308273,0,0.300000012,0.5,260,,30
2016-08-24 00:00:00,0.088372879,16.60000038,0.984359384,15.30000019,101.7601395,0,0.49000001,0.899999976,256,,-70,0.064213112,17.20000076,0.967089951,15.30000019,101.8627243,0,0.200000003,0.400000006,194,,-35,0.084572613,18.29999924,0.967089951,15.30000019,101.8334122,0,0.519999981,0.800000012,279,,0,0.21513921,19.39999962,0.954758048,15.5,101.8187561,0,0.49000001,0.800000012,260,,15,0.139902279,19.5,0.926794529,15.30000019,101.7308273,0,0.300000012,0.600000024,289,,30
2016-08-24 01:00:00,0.088372879,16.60000038,0.982538939,15.60000038,101.7601395,0,0.319999993,0.899999976,254,,-70,0.064213112,17.20000076,0.965598643,15.60000038,101.8627243,0,0.209999993,0.5,177,,-35,0.084572613,18.20000076,0.965598643,15.60000038,101.8480682,0,0.430000007,1,274,,0,0.21513921,19.10000038,0.965045154,15.69999981,101.8334122,0,0.5,0.899999976,248,,15,0.139471114,19.29999924,0.932025731,15.5,101.7308273,0,0.370000005,0.800000012,268,,30
2016-08-24 02:00:00,0.088372879,16.60000038,0.997093618,15.10000038,101.7601395,0,0.310000002,0.600000024,250,,-70,0.063719928,17.10000038,0.979600728,15.10000038,101.8627243,0,0.209999993,0.5,161,,-35,0.084095843,18.20000076,0.979600728,15.10000038,101.8334122,0,0.389999986,1.100000024,272,,0,0.21513921,18.79999924,0.972846389,15.30000019,101.8334122,0,0.439999998,1.100000024,241,,15,0.139471114,19.10000038,0.938784003,15.10000038,101.7454834,0,0.289999992,0.899999976,261,,30
2016-08-24 03:00:00,0.088372879,16.5,0.994539618,15.5,101.7747955,0,0.219999999,0.600000024,251,,-70,0.063719928,17,0.978060782,15.39999962,101.8627243,0,0.209999993,0.400000006,157,,-35,0.084095843,18.10000038,0.977490366,15.5,101.8480682,0,0.340000004,0.699999988,280,,0,0.215505451,18.60000038,0.976892173,15.60000038,101.8334122,0,0.360000014,0.800000012,261,,15,0.139471114,18.89999962,0.943742812,15.39999962,101.7308273,0,0.319999993,0.800000012,329,,30
2016-08-24 04:00:00,0.088372879,16.5,0.997093618,15.10000038,101.7601395,0,0.409999996,0.800000012,257,,-70,0.063719928,17,0.973769784,15.10000038,101.8627243,0,0.200000003,0.400000006,178,,-35,0.084572613,18,0.979600728,15.10000038,101.8334122,0,0.519999981,1,279,,0,0.215505451,18.39999962,0.97911638,15.19999981,101.8334122,0,0.50999999,1.299999952,264,,15,0.139471114,18.70000076,0.938784003,15.10000038,101.7308273,0,0.389999986,1,309,,30
2016-08-24 05:00:00,0.087899193,16.39999962,1.005170584,14.69999981,101.7454834,0,0.310000002,0.699999988,256,,-70,0.063719928,16.89999962,0.99361372,14.60000038,101.8627243,0,0.200000003,0.400000006,170,,-35,0.084572613,18,0.987221122,14.69999981,101.8187561,0,0.400000006,0.800000012,280,,0,0.215505451,18.20000076,0.986819267,14.80000019,101.8334122,0,0.349999994,0.699999988,265,,15,0.139471114,18.60000038,0.951322198,14.69999981,101.7454834,0,0.239999995,0.5,327,,30
2016-08-24 06:00:00,0.087899193,16.39999962,1.001628876,15.30000019,101.7601395,0,0.270000011,0.600000024,253,,-70,0.06322635,16.89999962,0.984909952,15.19999981,101.8627243,0,0.230000004,0.400000006,154,,-35,0.084095843,17.89999962,0.984359384,15.30000019,101.8334122,0,0.389999986,1,289,,0,0.215505451,18,0.977490366,15.5,101.8187561,0,0.379999995,1.200000048,278,,15,0.139471114,18.39999962,0.944063962,15.30000019,101.7308273,0,0.300000012,1,349,,30
2016-08-24 07:00:00,0.087899193,16.39999962,0.997913837,15.80000019,101.7601395,1.831054688,0.150000006,0.400000006,208,,-70,0.06322635,16.79999924,0.987488091,15.69999981,101.8627243,1.831054688,0.270000011,0.400000006,133,,-35,0.084572613,17.89999962,0.981189072,15.80000019,101.8334122,5.493164063,0.289999992,0.899999976,74,,0,0.215505451,17.89999962,0.979733944,16,101.8334122,16.47949219,0.280000001,0.899999976,23,,15,0.139471114,18.39999962,0.942164481,15.80000019,101.7454834,16.47949219,0.340000004,0.899999976,46,,30
2016-08-24 08:00:00,0.087899193,16.29999924,0.999914289,16.20000076,101.7747955,12.81738281,0.209999993,0.699999988,250,,-70,0.06322635,16.79999924,0.978177011,16.20000076,101.8773804,23.80371094,0.170000002,0.400000006,156,,-35,0.084572613,17.79999924,0.939199507,17.10000038,101.8480682,86.05957031,0.330000013,0.899999976,289,,0,0.21513921,17.89999962,0.925752401,17.5,101.8627243,137.3291016,0.300000012,0.699999988,267,,15,0.139471114,18.29999924,0.896366954,17.39999962,101.7601395,126.3427734,0.239999995,0.800000012,343,,30
2016-08-24 09:00:00,0.087899193,16.29999924,0.957664251,18.20000076,101.7894516,36.62109375,0.189999998,0.899999976,199,,-70,0.06322635,16.70000076,0.90177995,19,101.8773804,71.41113281,0.319999993,1,139,,-35,0.084095843,17.79999924,0.795968771,20.60000038,101.8627243,260.0097656,1.090000033,2.799999952,118,,0,0.21513921,18,0.775082052,21.20000076,101.8773804,386.3525391,0.769999981,2.700000048,116,,15,0.139471114,18.39999962,0.772588134,21,101.7894516,347.9003906,0.790000021,2.299999952,118,,30
2016-08-24 10:00:00,0.087425128,16.29999924,0.813341379,20.5,101.7747955,73.2421875,0.25999999,0.899999976,147,,-70,0.06322635,16.70000076,0.747258604,21.20000076,101.8773804,122.6806641,0.569999993,1,132,,-35,0.084095843,17.79999924,0.69307518,21.89999962,101.8773804,474.2431641,1.980000019,3.900000095,177,,0,0.214772642,18.60000038,0.687534034,22.29999924,101.8480682,487.0605469,1.700000048,3.599999905,164,,15,0.139471114,18.60000038,0.684253693,22.20000076,101.7894516,463.2568359,1.519999981,3.400000095,163,,30
2016-08-24 11:00:00,0.087425128,16.29999924,0.756988525,22,101.7747955,86.05957031,0.300000012,0.899999976,144,,-70,0.06322635,16.70000076,0.733578026,22.10000038,101.8920364,111.6943359,0.479999989,1.100000024,134,,-35,0.084095843,17.89999962,0.690238416,22.5,101.8773804,267.3339844,1.49000001,3.299999952,174,,0,0.214772642,19.29999924,0.672130227,23.20000076,101.8627243,514.5263672,1.360000014,3.299999952,169,,15,0.139471114,19,0.672665656,23.10000038,101.7894516,518.1884766,1.200000048,3.700000048,164,,30
2016-08-24 12:00:00,0.087425128,16.29999924,0.805676281,21.70000076,101.7454834,82.39746094,0.340000004,1.100000024,221,,-70,0.06322635,16.79999924,0.790256679,21.70000076,101.8627243,97.04589844,0.340000004,1.299999952,151,,-35,0.083618686,18.10000038,0.720981598,22.29999924,101.8627243,120.8496094,0.949999988,3.700000048,211,,0,0.214405745,20.20000076,0.675077617,23.29999924,101.8334122,481.5673828,1.039999962,3,190,,15,0.139902279,19.60000038,0.669125319,23.10000038,101.7601395,501.7089844,1.039999962,4,198,,30
2016-08-24 13:00:00,0.087425128,16.29999924,0.68425864,23.5,101.7308273,109.8632813,0.360000014,1,124,,-70,0.063719928,16.79999924,0.667537987,23.39999962,101.8187561,76.90429688,0.550000012,1.200000048,123,,-35,0.083618686,18.29999924,0.622053266,23.5,101.8187561,87.890625,1.5,4.199999809,155,,0,0.213670999,21,0.588469505,24.70000076,101.8187561,692.1386719,1.200000048,3.5,147,,15,0.139902279,20.20000076,0.585527778,24.60000038,101.7454834,715.9423828,1.320000052,4,146,,30
2016-08-24 14:00:00,0.086950675,16.39999962,0.648836195,24.29999924,101.6868591,206.9091797,0.360000014,1.100000024,120,,-70,0.063719928,16.89999962,0.644361436,23.89999962,101.7747955,146.484375,0.519999981,1.200000048,120,,-35,0.083618686,18.5,0.600504398,23.89999962,101.7747955,47.60742188,1.299999952,3.799999952,129,,0,0.213670999,22,0.571708977,25,101.7747955,600.5859375,1,3.599999905,118,,15,0.140333071,20.89999962,0.565391779,25,101.7015152,628.0517578,1.279999971,3.5,118,,30
2016-08-24 15:00:00,0.086475834,16.39999962,0.634052217,24.60000038,101.657547,108.0322266,0.409999996,1.399999976,128,,-70,0.063719928,17,0.621584713,24.5,101.7454834,84.22851563,0.50999999,1.299999952,121,,-35,0.083141148,18.60000038,0.579482317,24.39999962,101.7454834,32.95898438,1.440000057,4.800000191,125,,0,0.213303134,22.70000076,0.551883101,25.5,101.7308273,563.9648438,1.080000043,4.599999905,113,,15,0.140763521,21.39999962,0.539135337,25.79999924,101.6722031,607.9101563,1.299999952,3.299999952,113,,30
2016-08-24 16:00:00,0.086000606,16.5,0.633489072,24.70000076,101.6282349,133.6669922,0.360000014,1.299999952,130,,-70,0.063719928,17.20000076,0.608172536,24.60000038,101.7161713,49.43847656,0.529999971,1,121,,-35,0.083141148,18.70000076,0.559241414,24.89999962,101.7161713,29.296875,1.570000052,4.900000095,140,,0,0.213303134,23.29999924,0.542341053,25.70000076,101.7015152,270.9960938,1.25,3.5,132,,15,0.140763521,21.70000076,0.523423553,26.29999924,101.6428909,545.6542969,1.440000057,5.400000095,126,,30
2016-08-24 17:00:00,0.086000606,16.70000076,0.627582252,24.60000038,101.5989227,42.11425781,0.340000004,1.100000024,142,,-70,0.063719928,17.29999924,0.595232666,24.60000038,101.6868591,38.45214844,0.49000001,0.899999976,125,,-35,0.082663216,18.70000076,0.543193161,25.10000038,101.6868591,23.80371094,1.419999957,4.199999809,155,,0,0.212934956,23.29999924,0.539619088,25.5,101.6868591,38.45214844,1.25999999,4,150,,15,0.140763521,22,0.502547324,26.79999924,101.6135788,477.9052734,1.299999952,4,143,,30
2016-08-24 18:00:00,0.086000606,16.70000076,0.616290808,24.20000076,101.5696106,21.97265625,0.300000012,1.200000048,114,,-70,0.063719928,17.39999962,0.586030126,24.39999962,101.6722031,20.14160156,0.519999981,0.899999976,117,,-35,0.082663216,18.70000076,0.53372556,25.20000076,101.6722031,12.81738281,1.379999995,3,118,,0,0.212934956,22.89999962,0.533582032,25.39999962,101.657547,23.80371094,1.080000043,3.099999905,101,,15,0.140763521,22.10000038,0.51195246,26,101.5989227,168.4570313,1.409999967,3.799999952,104,,30
2016-08-24 19:00:00,0.086000606,16.79999924,0.628260136,23.70000076,101.5403061,9.155273438,0.180000007,0.699999988,136,,-70,0.063719928,17.5,0.596906662,24,101.6428909,7.32421875,0.469999999,0.800000012,124,,-35,0.082663216,18.70000076,0.540122867,25,101.6282349,3.662109375,1.210000038,2.900000095,147,,0,0.213303134,22.39999962,0.549598694,25,101.6282349,16.47949219,0.860000014,3,133,,15,0.140333071,22.10000038,0.543193161,25.10000038,101.5549622,20.14160156,1.100000024,2.5,129,,30
2016-08-24 20:00:00,0.086000606,16.89999962,0.68190819,22.70000076,101.5403061,0,0.209999993,0.699999988,120,,-70,0.063719928,17.60000038,0.651423573,23.10000038,101.6282349,0,0.479999989,0.699999988,117,,-35,0.082663216,18.70000076,0.600504398,23.89999962,101.6135788,0,0.920000017,1.899999976,122,,0,0.213303134,21.89999962,0.607251644,23.89999962,101.6282349,7.32421875,0.600000024,1.600000024,103,,15,0.139902279,21.79999924,0.607251644,23.89999962,101.5403061,7.32421875,0.910000026,2.400000095,96,,30
2016-08-24 21:00:00,0.085524991,16.89999962,0.726372182,21.39999962,101.5403061,0,0.159999996,0.5,144,,-70,0.063719928,17.60000038,0.685825527,21.79999924,101.6428909,0,0.460000008,0.800000012,125,,-35,0.082663216,18.70000076,0.650370002,22.29999924,101.6428909,0,0.550000012,1.100000024,153,,0,0.213303134,21.5,0.669934869,22,101.6282349,0,0.460000008,1.200000048,162,,15,0.139471114,21.5,0.678162694,21.79999924,101.5403061,0,0.389999986,1,136,,30
2016-08-24 22:00:00,0.085524991,16.89999962,0.783229649,20,101.5696106,0,0.150000006,0.400000006,143,,-70,0.063719928,17.60000038,0.722047985,20.5,101.657547,0,0.449999988,0.699999988,124,,-35,0.082663216,18.70000076,0.684062421,21,101.657547,0,0.610000014,1.399999976,141,,0,0.213303134,21.10000038,0.705003262,20.70000076,101.657547,0,0.389999986,1.5,150,,15,0.139039591,21.20000076,0.709598839,20.5,101.5696106,0,0.409999996,1.399999976,130,,30
2016-08-24 23:00:00,0.085524991,16.89999962,0.833463311,19,101.5842667,0,0.170000002,0.400000006,233,,-70,0.063719928,17.60000038,0.805141747,19.20000076,101.6722031,0,0.230000004,0.5,136,,-35,0.082184896,18.70000076,0.763416171,19.60000038,101.657547,0,0.5,1.399999976,40,,0,0.213303134,20.70000076,0.777792335,19.29999924,101.657547,0,0.469999999,1,345,,15,0.139039591,20.89999962,0.773966968,19.10000038,101.5696106,0,0.389999986,1.100000024,21,,30
2016-08-25 00:00:00,0.085524991,16.89999962,0.870707631,17.5,101.5696106,0,0.159999996,0.5,272,,-70,0.063719928,17.60000038,0.870707631,17.5,101.6722031,0,0.180000007,0.5,152,,-35,0.082184896,18.70000076,0.866152346,17.39999962,101.6428909,0,0.310000002,0.899999976,32,,0,0.213303134,20.29999924,0.881779373,17.29999924,101.657547,0,0.319999993,1,1,,15,0.138607711,20.5,0.862215936,17.10000038,101.5549622,0,0.319999993,0.699999988,43,,30
2016-08-25 01:00:00,0.085524991,16.89999962,0.905426025,16.70000076,101.5696106,0,0.189999998,0.400000006,256,,-70,0.06322635,17.5,0.890007377,16.60000038,101.6722031,0,0.270000011,0.5,232,,-35,0.082184896,18.60000038,0.895305037,16.60000038,101.6282349,0,0.280000001,0.699999988,292,,0,0.213303134,19.89999962,0.906348407,16.5,101.6428909,0,0.330000013,1,273,,15,0.138175473,20.20000076,0.891227961,16.20000076,101.5696106,0,0.219999999,0.800000012,298,,30
[truncated: 2,131,823 more chars]
